# Supplementary material
Source: PubMed Central journal article supplement (PMC3779841)
Supplement: NIHMS477806-supplement-Figure_S1.pdf [file NIHMS477806-supplement-Figure_S1.pdf]

**Figure S1 – Additional sites phosphorylated by ERK2 on IRS2, CDC42EP1 and ETV3**

**a. Insulin receptor substrate 2 (GI: 124487073)**

1 masaplpgpp asagdggnl nnnnnnnhs vrkcgylrkq khghkrffvl rgpgtgqdea  
 61 saaggsppqp prleyvesek kwrskagapk rvialdccln inkradakhk ylialytkde  
 121 yfavaaeneq eqegwyralt dlvsegrsge gsgtggsc saslpqvlvg sagaagcddn  
 181 yglvtpatav yrevwgvnlk pkglgqsknl tgvyrlclsa rtigfvklnc egpsvtlqlm  
 241 nirrcghsds fffievgrsa vtgpgelwmq addsvvaqni hetileamka lkelfefrpr  
 301 sksgssgssa thpivpgar rhhhlvnlpp sqtglvrrsr tdslaatppa akctscrvt  
 361 asegdggaag gtagtagrpm svagsplsp pvrapsrsh tlasagcgrp skvtlapagg  
 421 alghsrmsm pvahsppaat spgslssssg hsgsyplpp gshphlphpl hhpqgqrps  
 481 gsasasgsp dpgfmsldey gsspgdlraf sshrntpes iaetpardg sggelygyms  
 541 mdrplshcgr pyrrvsqdg qdldrglkr tyslttparq rgvpqpsas ldeytlmrat  
 601 fsqssgrlcp sfpaspkva ynpypedvq ieigshksss snlgaddgym pmtpgaalrs  
 661 gpnscsdd ympmtpsvs apqilqprl aaalppsaa vpappsgvr tfpvnqgyk  
 721 astpaesspe dsqymrmwcc sklsmenpd klpnpqdyn mspseagtag tpdfsaalr  
 781 ggsegkqip ghcysslprs ykapcscsgd ndqyvlmssp vgrileeerl epqatpgagt  
 841 fgaaggshtq phhsavpssm rpsaigrpe gflgqrcrav rptrlsleql gtlpsmqeyp  
 901 lptekspge vinidfgeag trlspapp lasaasssl lsasspassl gsqtpqtssd  
 961 srqrspldsy mnldfsspks pkpstrsgdt vgsmdgllsp easspyplp prpstpsl  
 1021 qqplppapgd lyrlppasaa tsqgtagss mssepqngd ytemafgva tppqipvapp  
 1081 kpegarvatp tsqlkrlsim dqvsqveafl qvsqppdphr gakviradpq grrrhssst  
 1141 fsstttvtpv spsfahnskr hnsasvens lrkssegst lgggdeppts pgqaqplvav  
 1201 ppvpqarpwn pgqgaligc pggsspmrr etsvgfngl nyiaidvrge qgslaagqpq  
 1261 pdgknsrswrt rslgllgtv ggsgasvcg pggtgalpsa styasidfls hhlkeatvvk  
 1321 e

**b. Ets variant gene 3 (PE1, METS) (GI: 134031941)**

1 mkaacsivek peggqgvqfp dwaykaestp gsrqqlwhf ilellqkeef rhviawqqge  
 61 ygefvikdpd evarlwgrrk ckpqmnydkl sralryyynk rilhktkqkr ftykfnfnk  
 121 ympnyfjni rsggvpcsa ppvptassrf hfppldshtp tgdvqqrfs asslsasgpe  
 181 sqvttdrkve psdledqas dwhrqmdfmp srnalggav ghqkrkdil lpftrpamy  
 241 pdphtpfais pvpqrqgvln vpispalslt ptmfsysp glspftssc fsfnpeemkh  
 301 ylhsqacsvf nyhlsprtfp rypglmvppl qcqmhppeps qfsiklqppp agrknrerve  
 361 sreeavrgsv pasapvpsri kvepatekdp dslrqstqgk eeqtqevdsi rsrtieegkg  
 421 tqfahptp psvsistpsd eplegtedse drsarepgvp ekkedalmp klrlkrrwnd  
 481 dpearelntk gkflwngagp qglattataa ada

**c. CDC42 effector protein 1 (GI: 21312428)**

1 mpqpgqatga ptmslqkltp vqvwssshqk rrltadmisp plqdfrrhth vqrgqdvfgd  
 61 tsflsnhgqr sgnthrsprs flarklqqvr rvqvpprrma spaapsapp pitpiiknai  
 121 slpqlngaty dslvmgklsf dstpasstdg hsgyglesgf ctisrlprve khsnrdrdrd  
 181 pdhsqdreqs sfpseptpnp elrrsdsls frfdldlgs llsellgvms lseapaaetp  
 241 vptanppapa anpaptakpp ahaittdav tslpasavts lpapavassp srghfpngvt  
 301 svlgpaaeak pspvgegpqv psnmafdrhg aswgasrasw gasrasrhyt emdarrelag  
 361 vlpqvhgswe slnedwsapp asvrapvpts vqvnafefad aeddevkv

Recombinant proteins were phosphorylated by ERK2 in *in vitro* kinase reactions, digested with trypsin or chymotrypsin, phosphorylated peptides enriched by IMAC and identified by HPLC-MS/MS.

Underline indicates peptides observed in phospho-mapping experiments and phosphorylated residues are highlighted. IRS2 and CDC42EP1 were analyzed with tryptic digest; ETV3 was analyzed with trypsin and with chymotrypsin. Phosphorylation sites detected on IRS2 are: T524, T576, T653, S675, S723, S980, S1089. Phosphorylation sites on ETV3 are: S29, S139, S159, S181, S245, S250, S373, S427. Phosphorylation sites on CDC42EP1 are: S19, S113, T197. None of these sites were detected in mock kinase reactions.
