# Supplementary material
Source: PubMed Central journal article supplement (PMC3779841)

**Figure S3 – HA-tagged ETV3 exhibits MEK-dependent gel shift which is reduced in the phosphosite mutants, and anti-HA antibody captures both the phosphorylated and non-phosphorylated protein in CHIP**

**A)** HA-tagged ETV3 expressed in HEK 293T cells recapitulates the gel shift seen for endogenous ETV3. Treatments are 40 minutes U0126 (10  $\mu$ M) and 20 minutes PMA (100 nM). **B)** IP with anti-HA antibody pulls down HA-tagged ETV3 regardless of phosphorylation state (10% of several samples used for ChIP-PCR experiments in Fig. 3E). **C)** Gel shift of wild-type and serine to alanine ETV3 mutants expressed in HEK 293T cells. Red is HA-tag, green is  $\beta$ -actin. Lane 1: WT ETV3 (U0126), 2: WT ETV3 (PMA), 3: S29A (PMA), 4: S139A (PMA), 5: S139/159/245/250A (PMA).

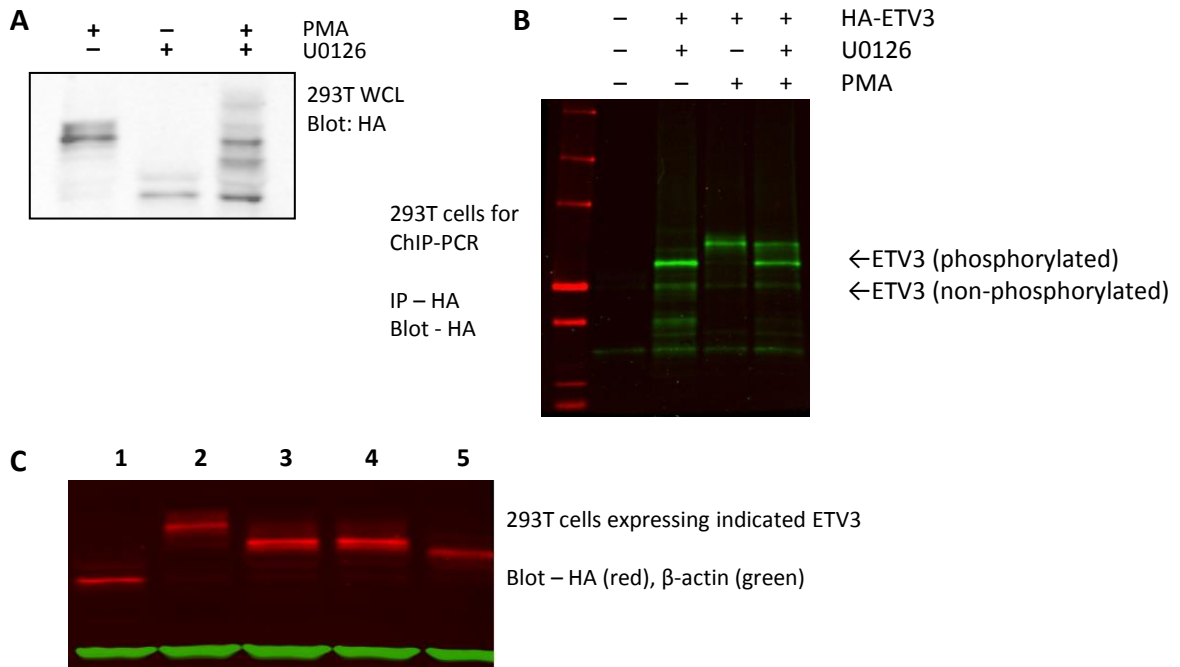

Supplement: NIHMS477806-supplement-Figure_S3.pdf [file NIHMS477806-supplement-Figure_S3.pdf]
