# Supplementary material
Source: PubMed Central journal article supplement (PMC3779841)

**Figure S4 – Immunofluorescence for HA-tagged ETV3 expressed in HEK 293T cells showing nuclear localization regardless of ERK activity**

Direct immunofluorescence with an Alexa488-conjugated anti-HA antibody of HEK 293T cells expressing HA-tagged ETV3 shows the same results as staining for endogenous ETV3. Treatments were 20 minutes U0126 at 10  $\mu$ M or PMA at 100 nM. Samples were processed in parallel and images were collected and processed identically.

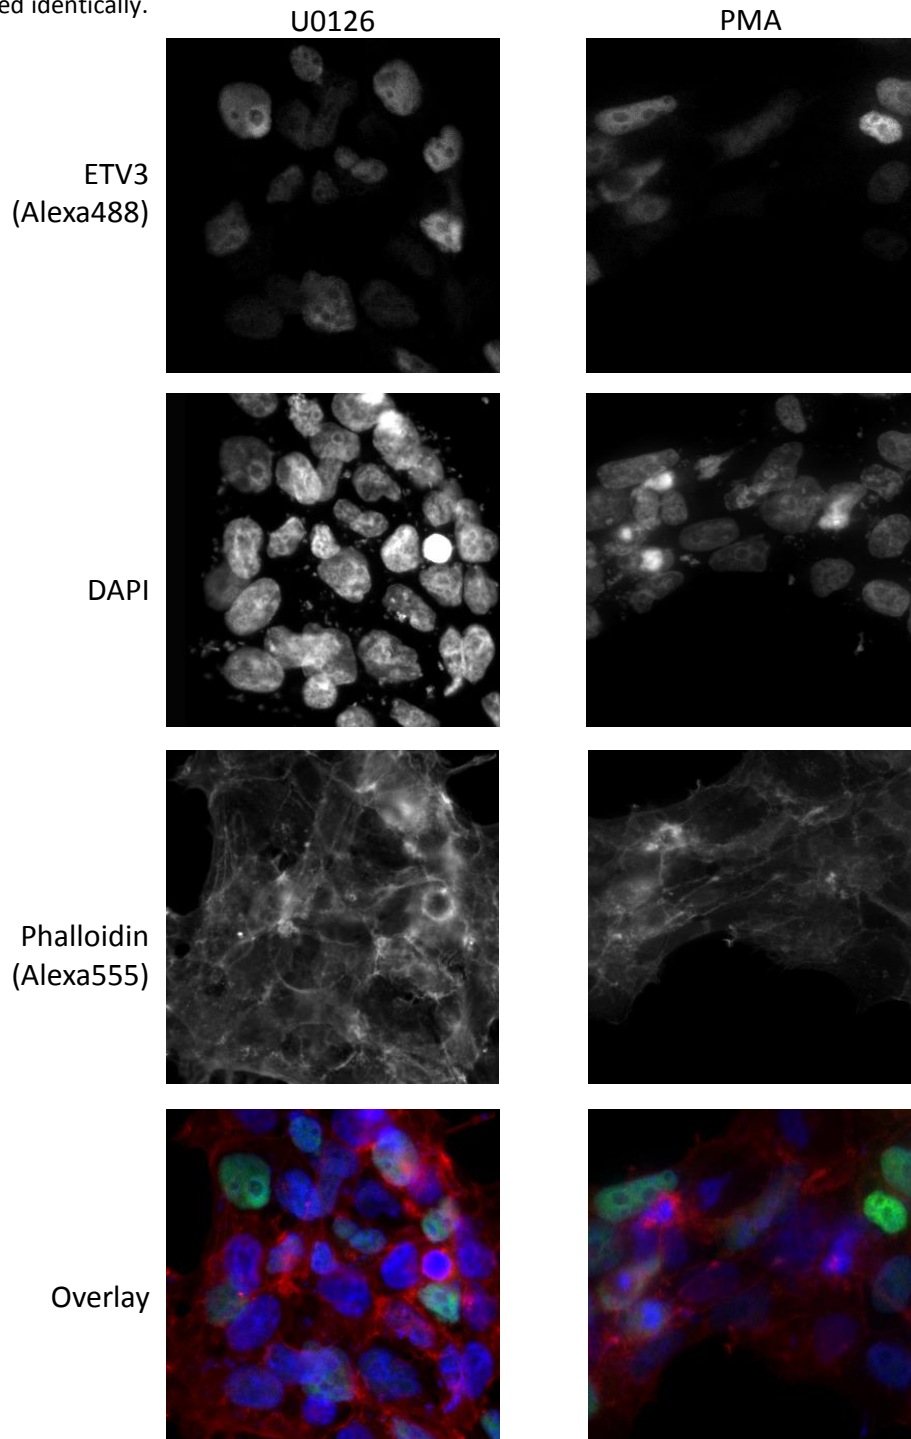

Supplement: NIHMS477806-supplement-Figure_S4.pdf [file NIHMS477806-supplement-Figure_S4.pdf]
