# Supplementary material
Source: PubMed Central journal article supplement (PMC3779841)

**Figure S5 – Immunofluorescence for endogenous ETV3 in DLD1 cells showing primarily nuclear localization regardless of ERK activity**

Indirect immunofluorescence indicates that, unlike the related protein ERF, phosphorylated ETV3 remains primarily nuclear, although concentrated fluorescence intensity is reduced. DLD1 cells treated with U0126 (10  $\mu$ M) or PMA (100 nM) for 30 minutes and then stained with anti-ETV3 antibody or an equal amount of normal rabbit IgG, followed by Alexa488 conjugated goat anti-rabbit secondary.

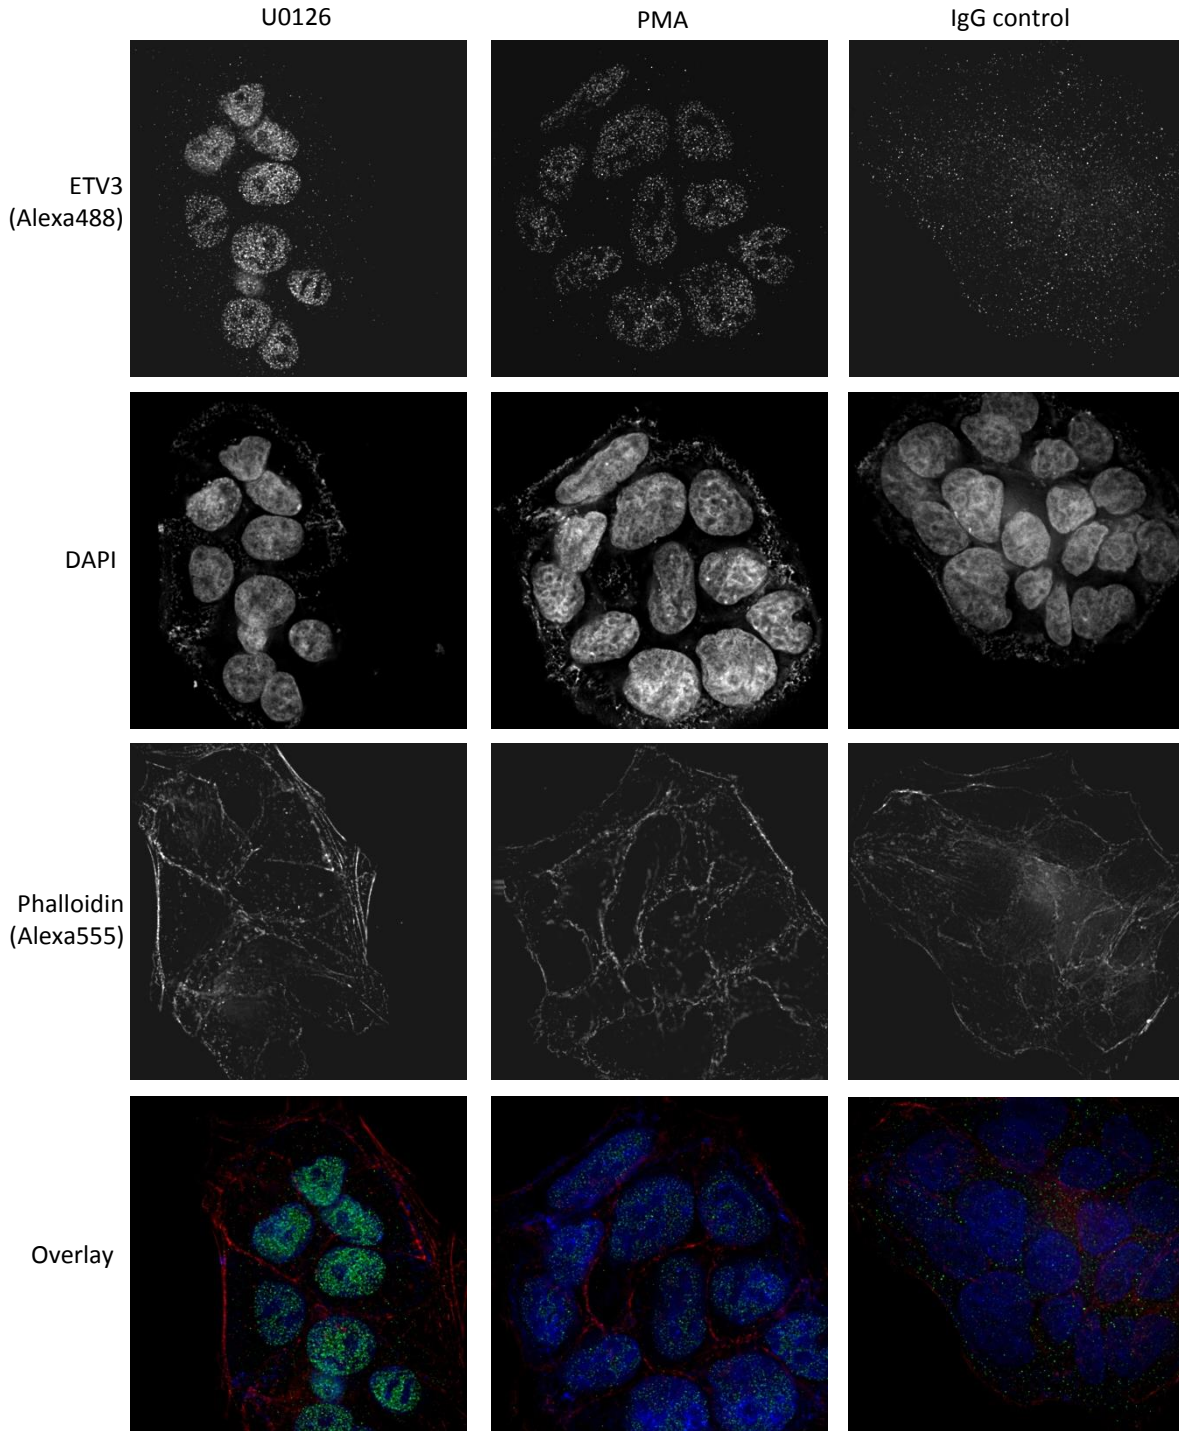

Supplement: NIHMS477806-supplement-Figure_S5.pdf [file NIHMS477806-supplement-Figure_S5.pdf]
