# Supplementary material
Source: PubMed Central journal article supplement (PMC3779841)

**Figure S6 - ETV3 binding sites occur near known transcriptional start sites**

Distribution of peak positions relative to the closest known transcriptional start site showing that most ETV3 binding sites fall immediately before or soon after the start of known genes.

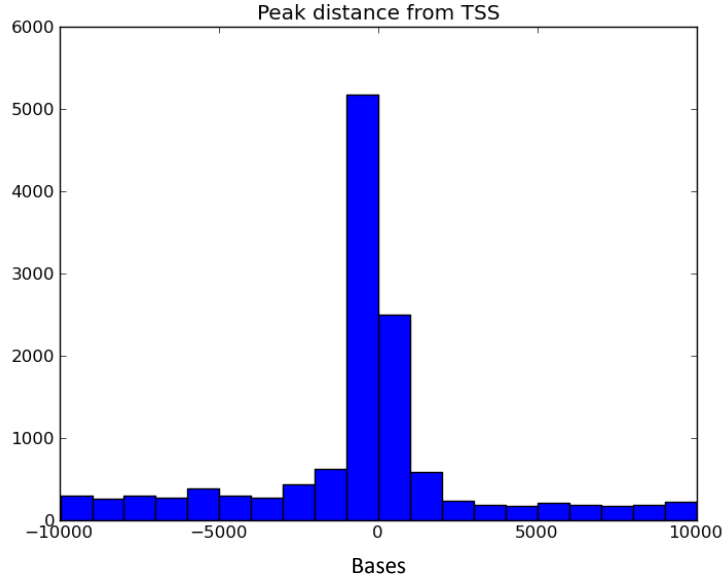

**Figure S7 – Phosphorylation by ERK2 does not affect stability of ETV3**

ETV3 stability is independent of ERK activation. 293T cells transfected with HA-tagged ETV3 were treated with cycloheximide (75 µg/mL) for up to six hours and ETV3 abundance was analyzed by Western blot with near-IR fluorescent antibodies (N = 3, error bars indicate S.E.M.).

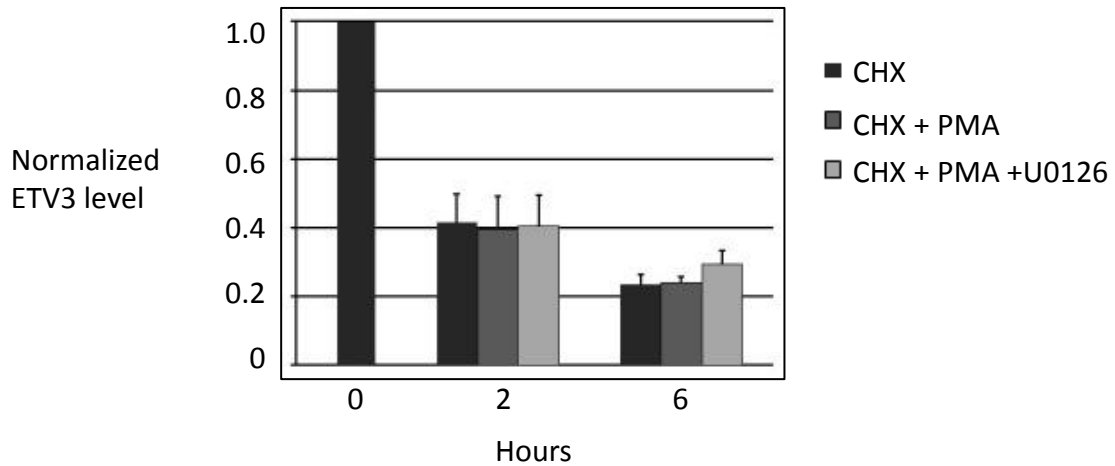

Supplement: NIHMS477806-supplement-Figure_S6.pdf [file NIHMS477806-supplement-Figure_S6.pdf]
