# Supplementary material
Source: PubMed Central journal article supplement (PMC3779841)
Supplement: NIHMS477806-supplement-Supplemental_Spectra.pdf [file NIHMS477806-supplement-Supplemental_Spectra.pdf]

Peaks constraining the position of the phosphorylation site are underlined in red

5'-3' exoribonuclease 2  
 GI 117606214, m/z 684.34 (+3), Mascot score 33  
 SILAC K6 R6

Peptide: DQPAFTPSGILpTPHALGSR

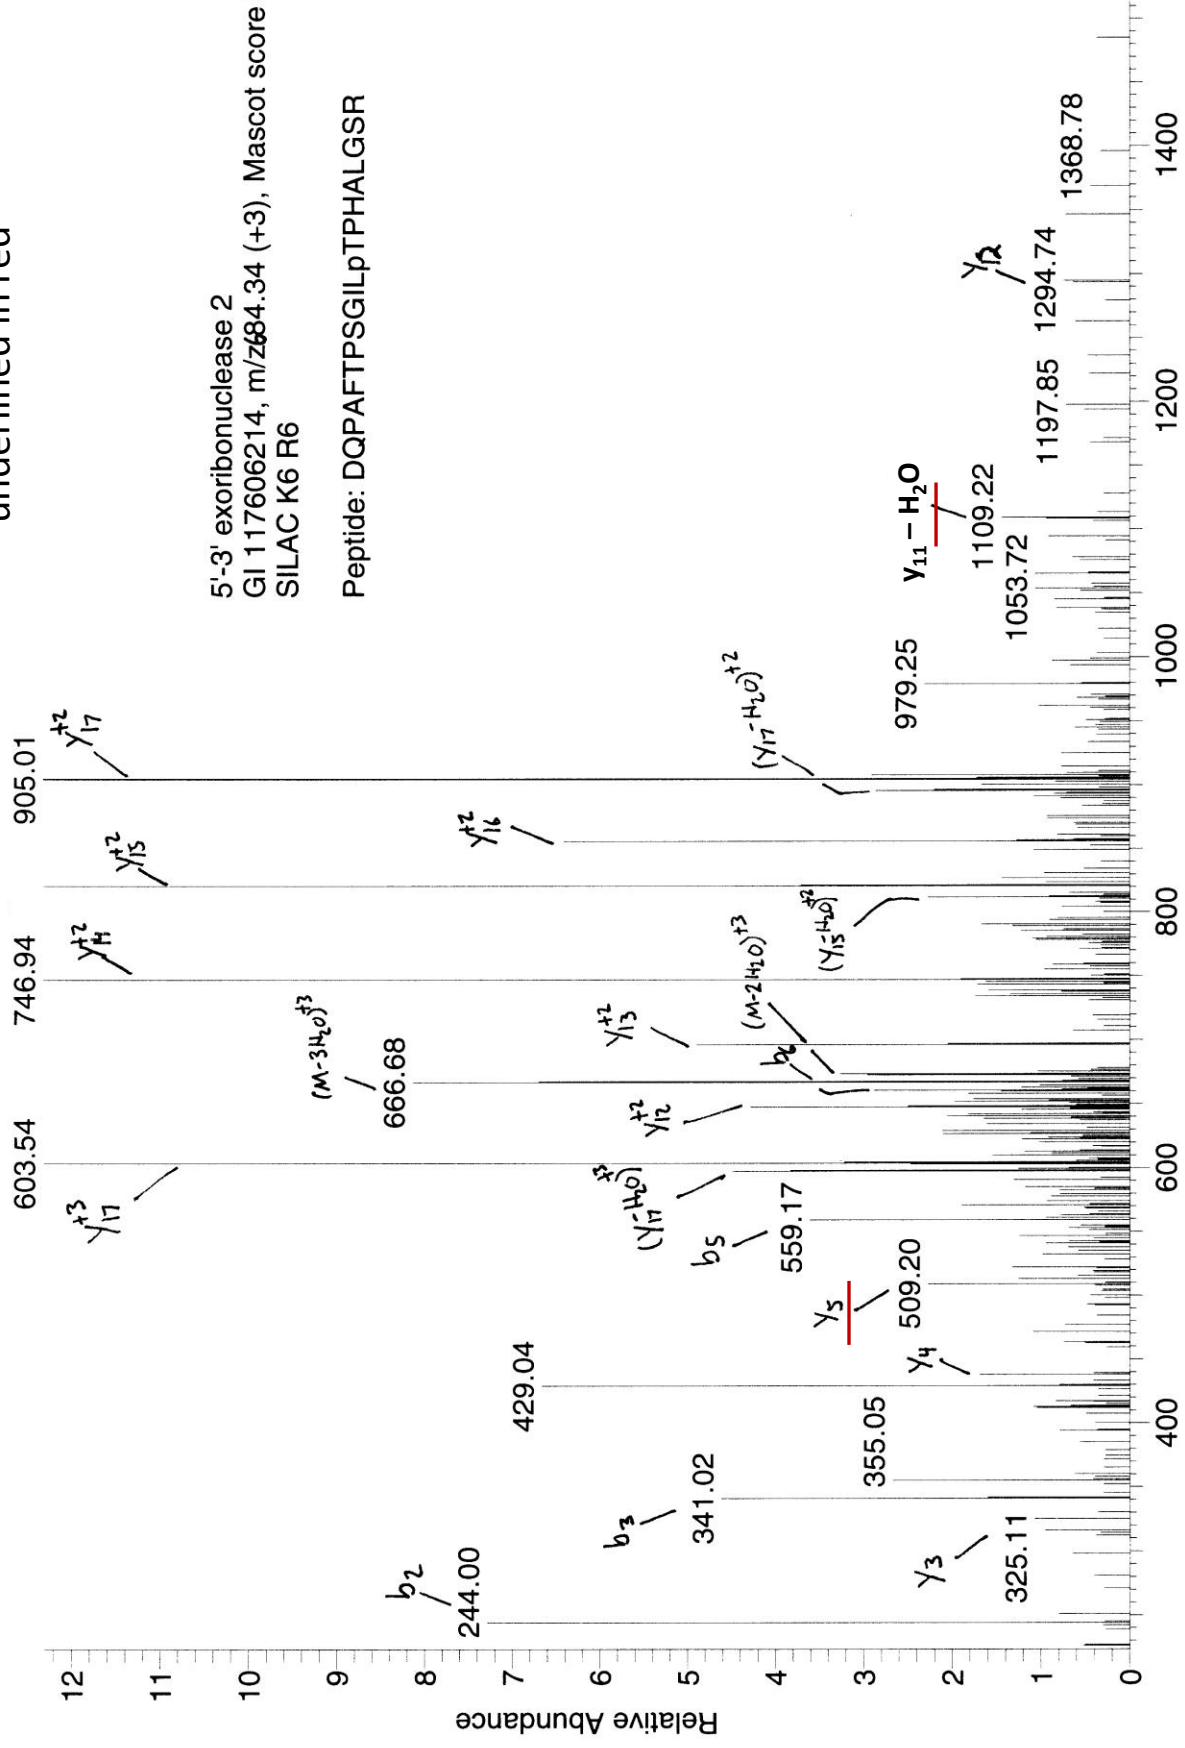

**A kinase (PKRA) anchor protein (gravin) 12**  
 GI 13626040, m/z 908.77, Mascot score 57  
 SILAC K8 R10  
 Peptide: EKEPTKPLE(pS)PTSPVSNETTSSFK

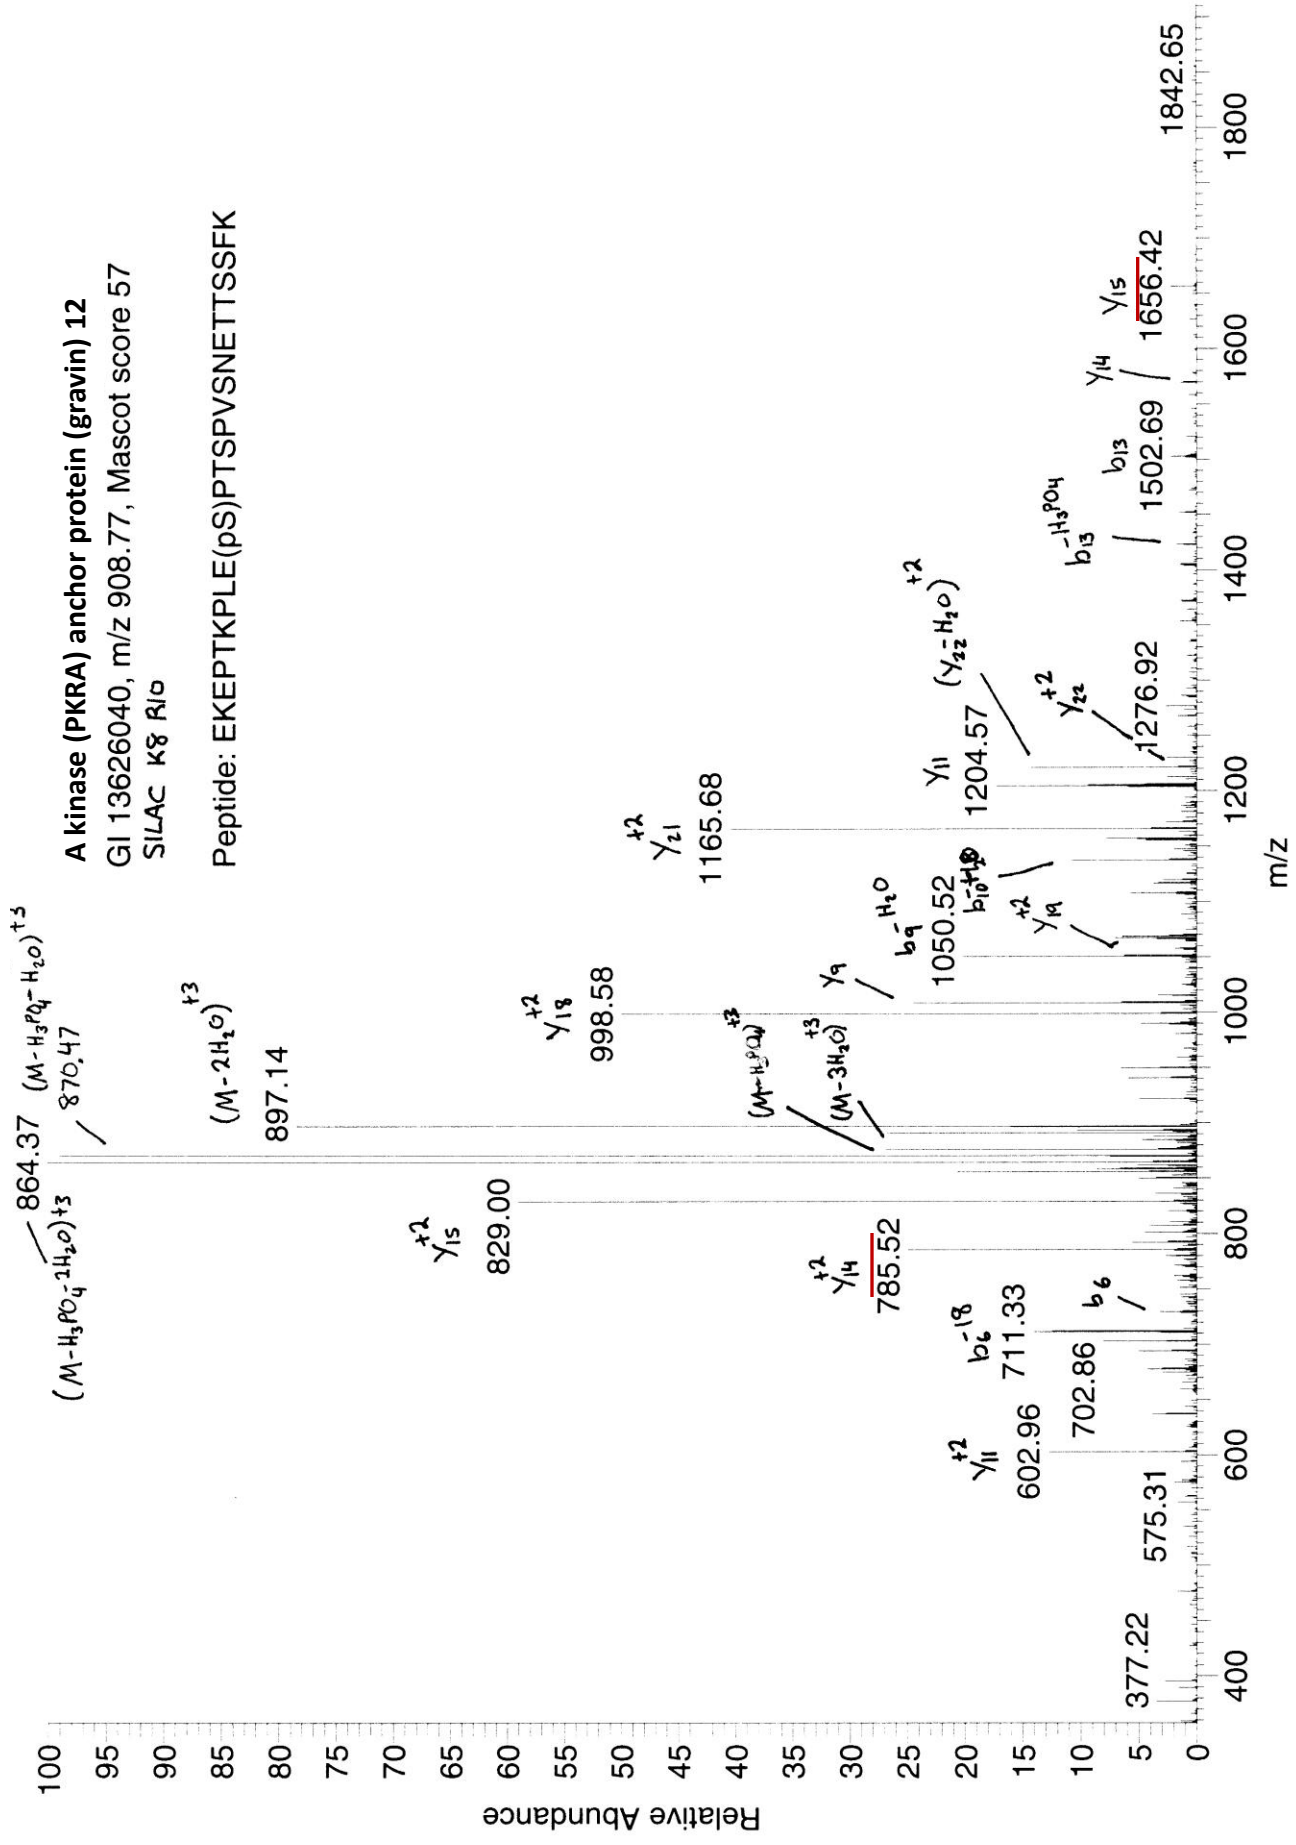

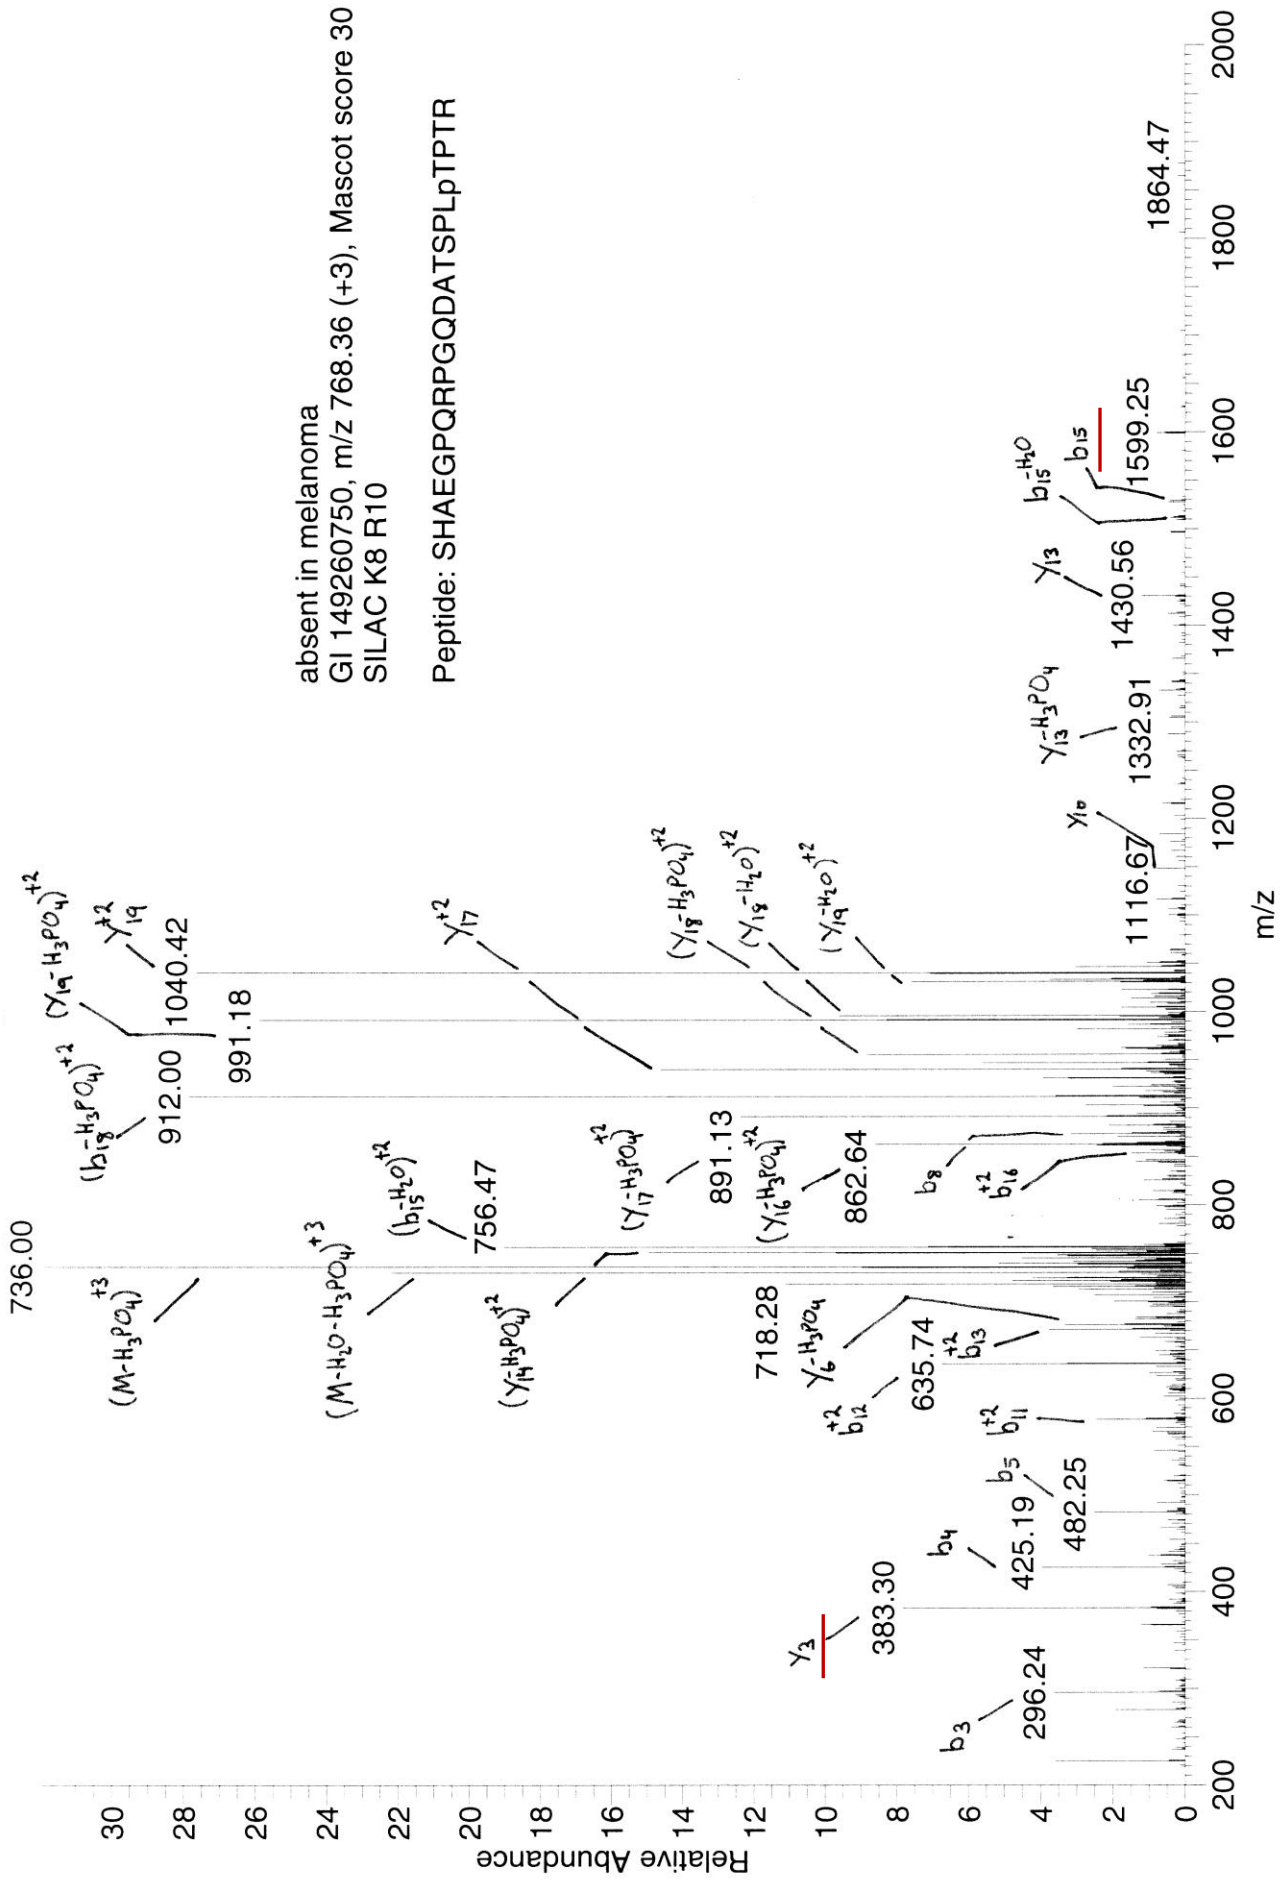

absent in melanoma  
 GI 149260750, m/z 768.36 (+3), Mascot score 30  
 SILAC K8 R10

Peptide: SHAEGPQRPGQDATSPLpTPTR

AHNAK nucleoprotein isoforms 1  
 GI 61743961, m/z 1034.97 (+2), Mascot score 107  
 SILAC K6 R6

Peptide: EFSAPSpTPTGTLEFAGGDAK

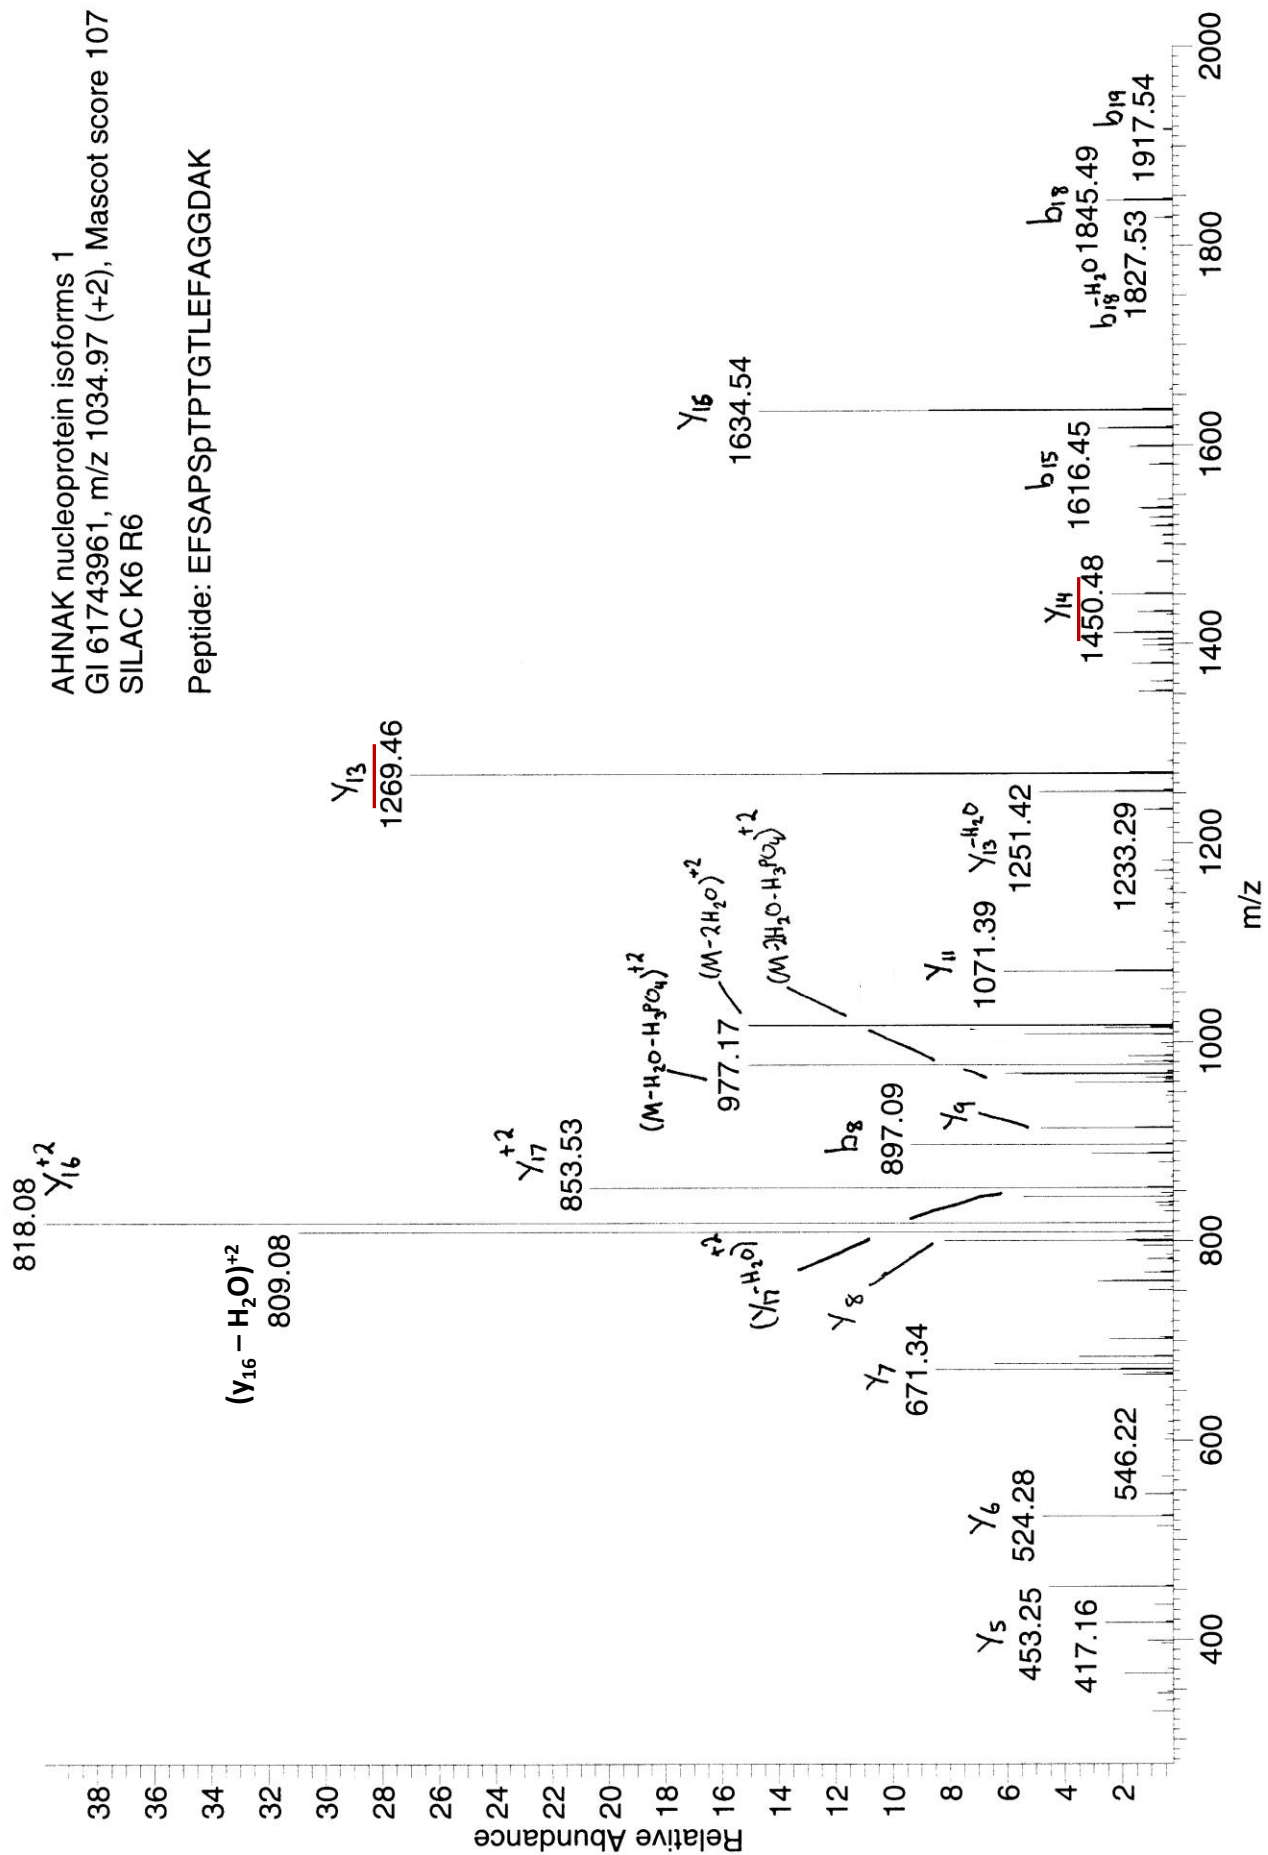



591.78

AHNAK nucleoprotein isoform 1  
GI 61743961, m/z 640.83 (+2), Mascot score 50  
SILAC K8 R10

Peptide: FKAEAPLPSPK

45

40

35

30

25

20

15

10

5

0

Relative Abundance

$(M-H_3PO_4)^{+2}$

$\gamma_6$

726.23

997.46

$\gamma_9$

$\gamma_4$

516.28

$b_5$

$b_7$

765.39

$\gamma_1$

797.49

$\gamma_4-H_3PO_4$

418.30

$b_4$

$(M-H_2O)^{+2}$

631.74

555.24

$b_1-H_2O$

484.35

$b_5-H_2O$

466.22

719.37

691.49

882.42

949.65

997.46

1029.20

931.58

908.33

899.54

$\gamma_9-H_3PO_4$

$b_9-H_3PO_4$

355.33

$b_3$

337.34

$b_5-H_2O$

284.24

$b_2$

365.34

$b_3$

$b_5-H_2O$

m/z

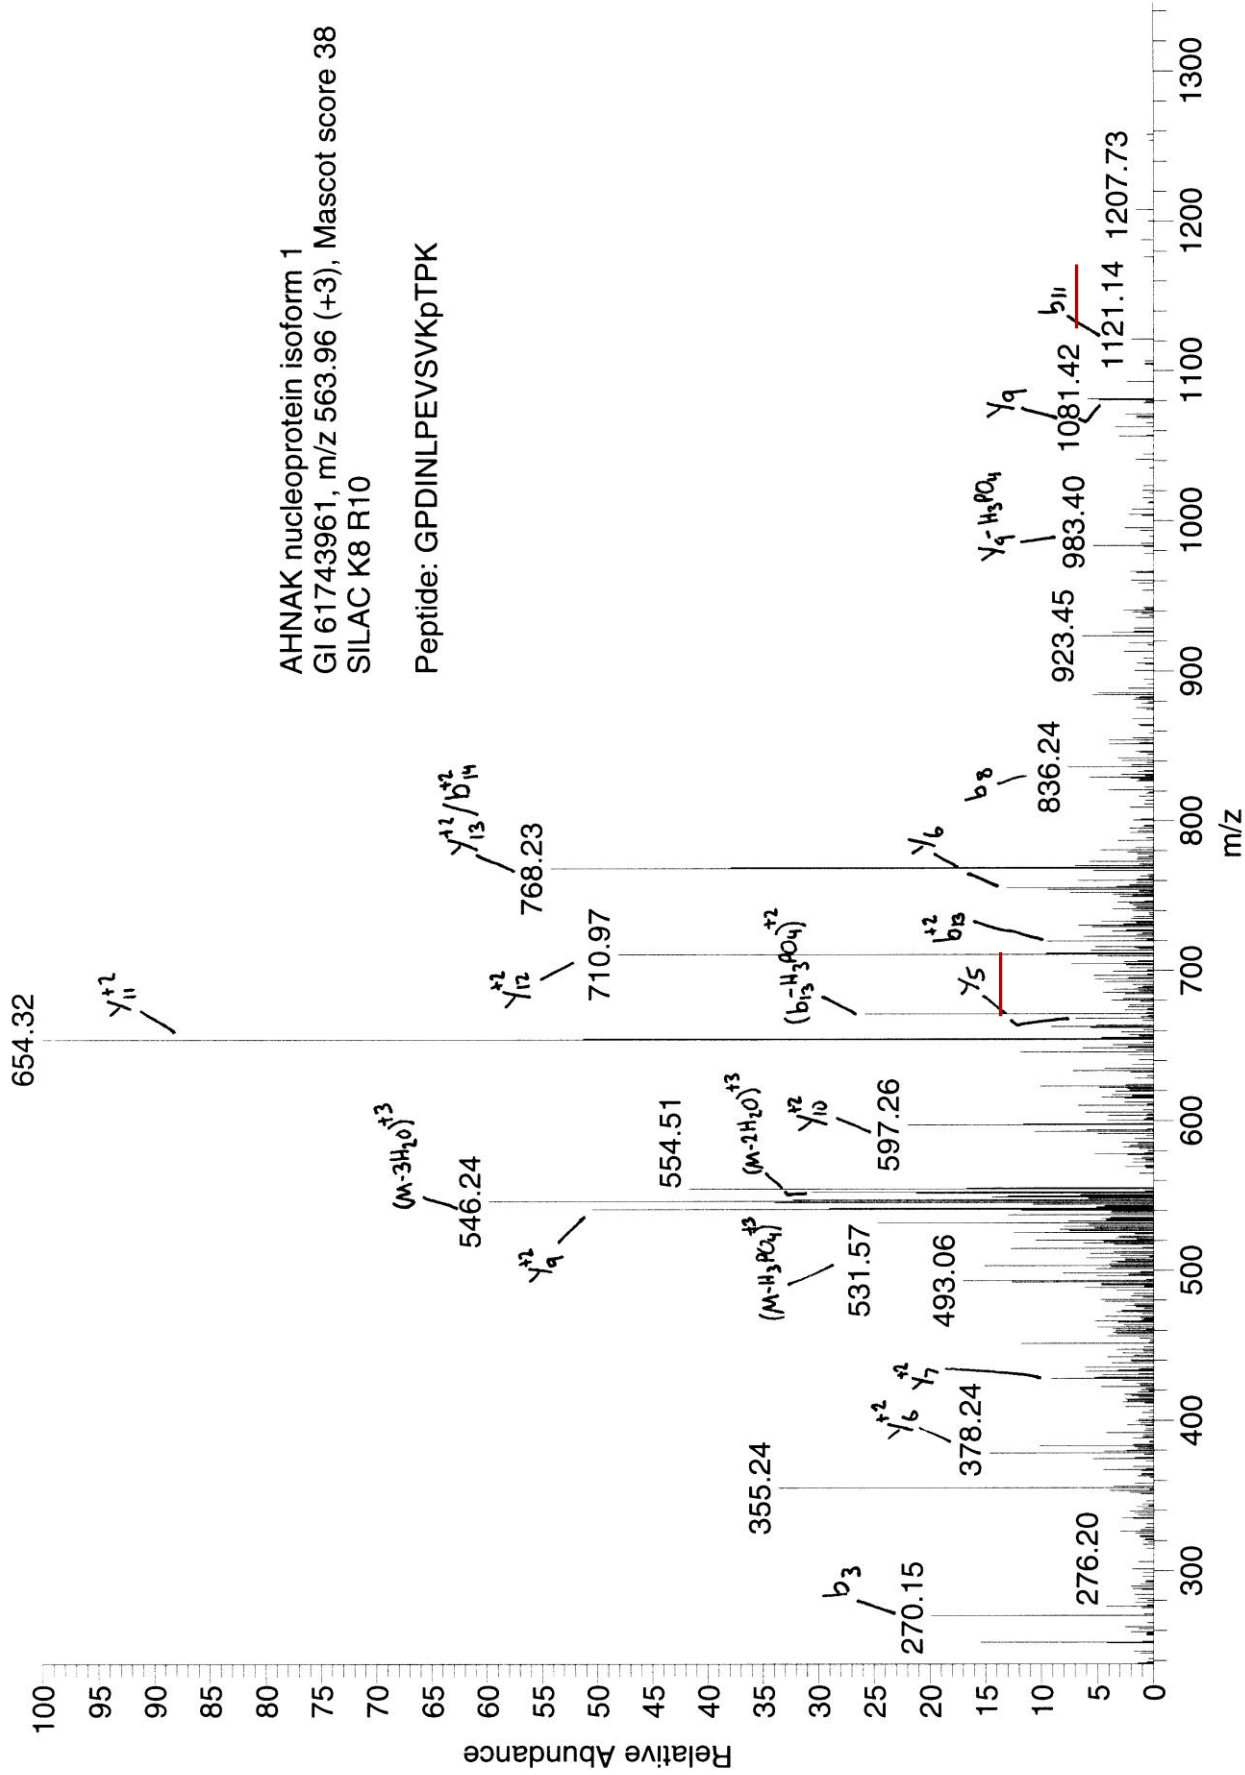

AHNAK nucleoprotein isoform 1  
 GI 61743961, m/z 563.96 (+3), Mascot score 38  
 SILAC K8 R10

Peptide: GPDINLPEVSVKpTPK

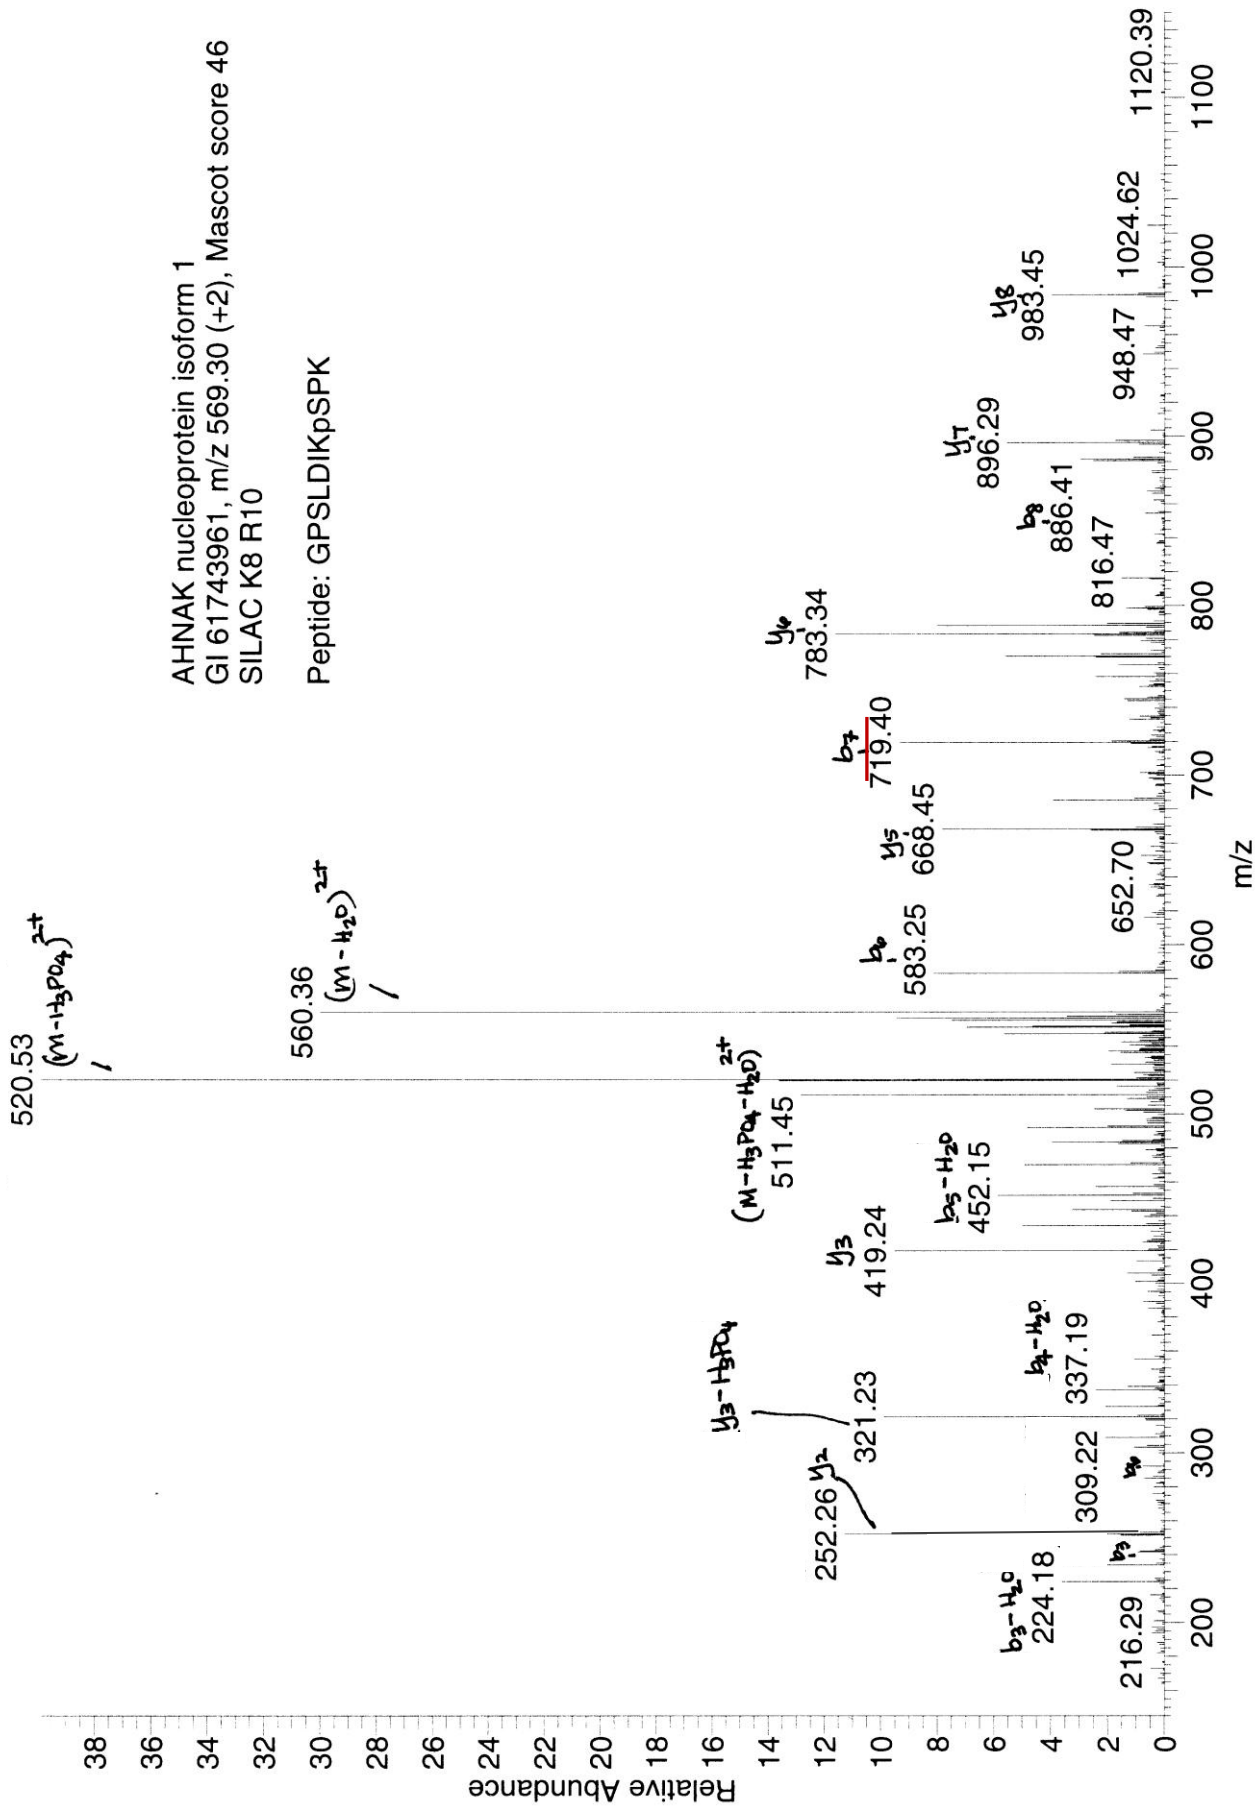

AHNAK nucleoprotein isoform 1  
 GI 61743961, m/z 569.30 (+2), Mascot score 46  
 SILAC K8 R10

Peptide: GPSLDIKpSPK

AHNAK nucleoprotein isoform 1  
GI 61743961, m/z 930.44 (+2), Mascot score 89  
SILAC K6 R6

Peptide: LPSSGSPApSPTTGSVAVDIR

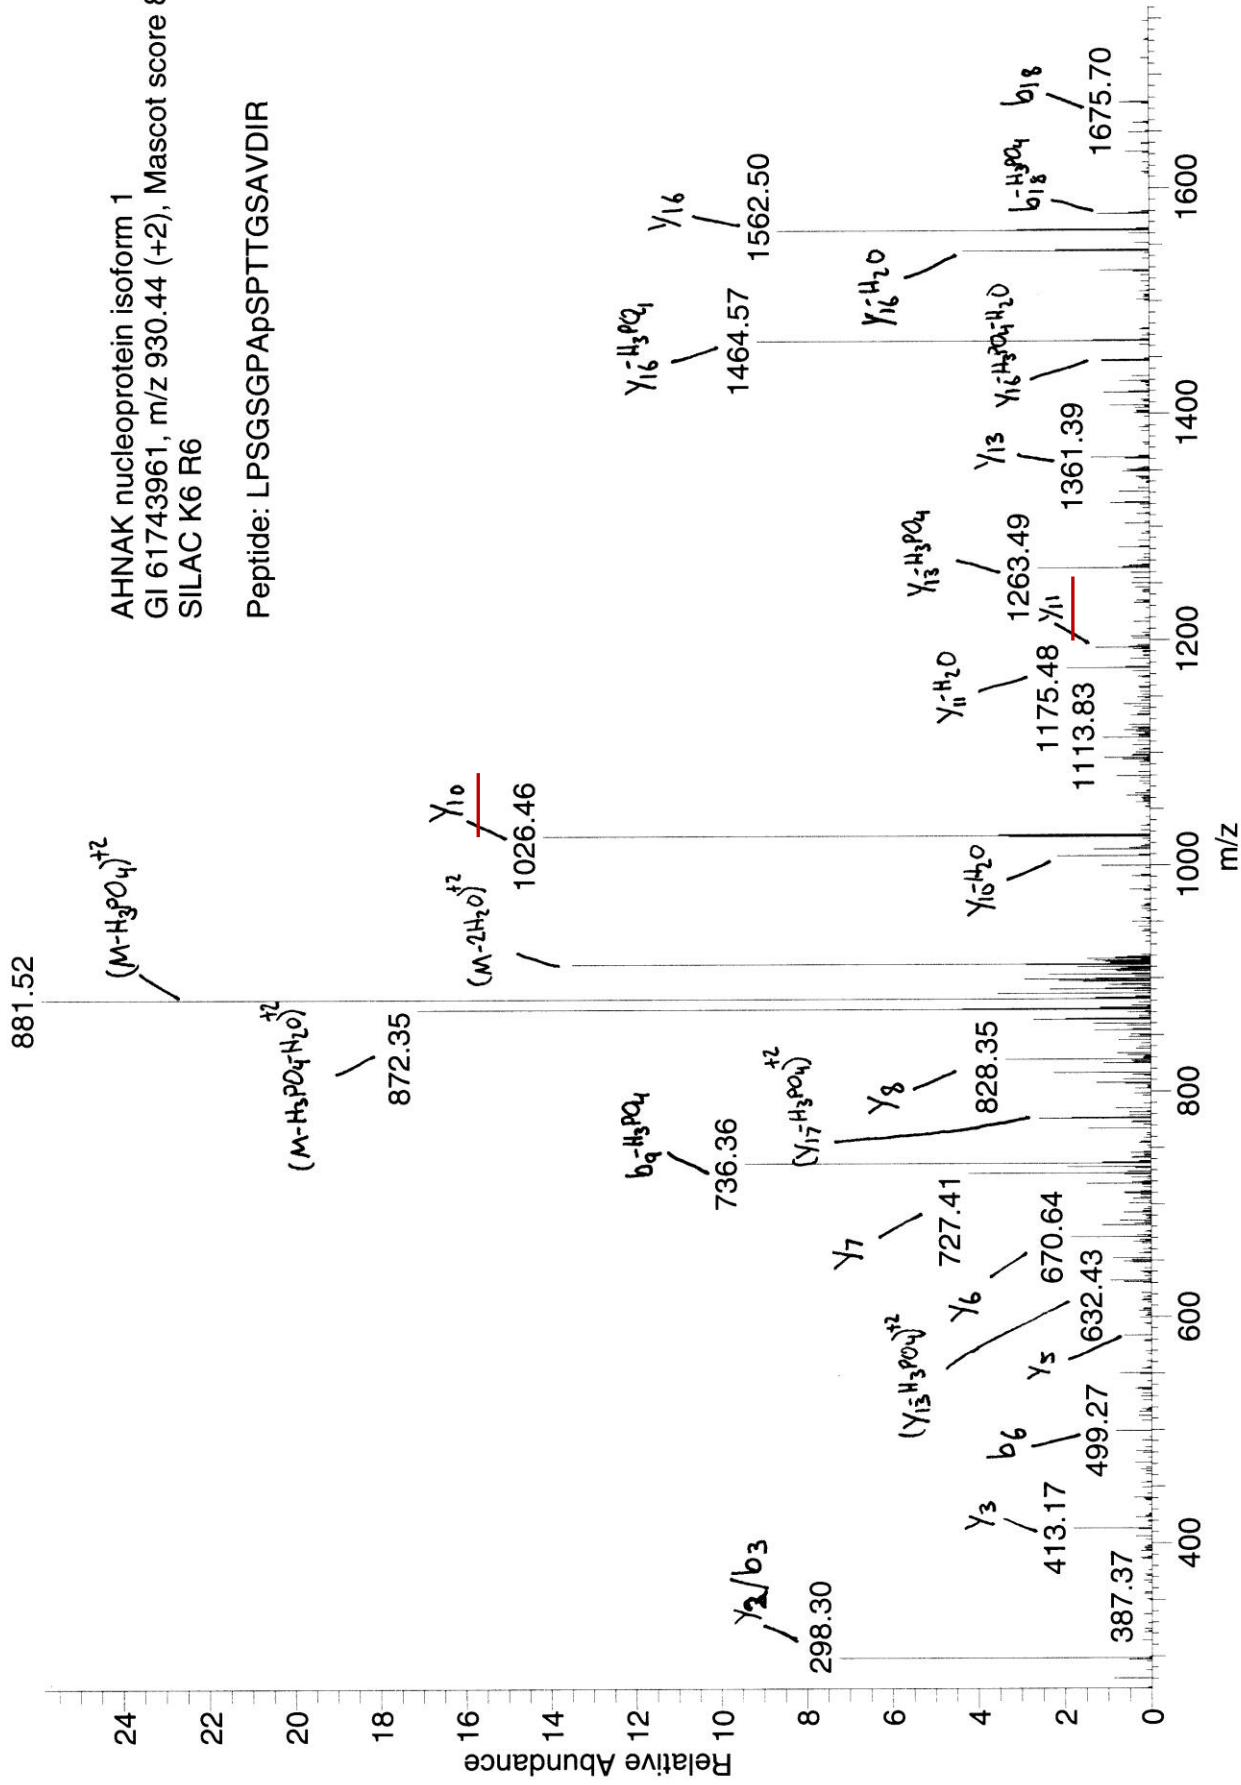

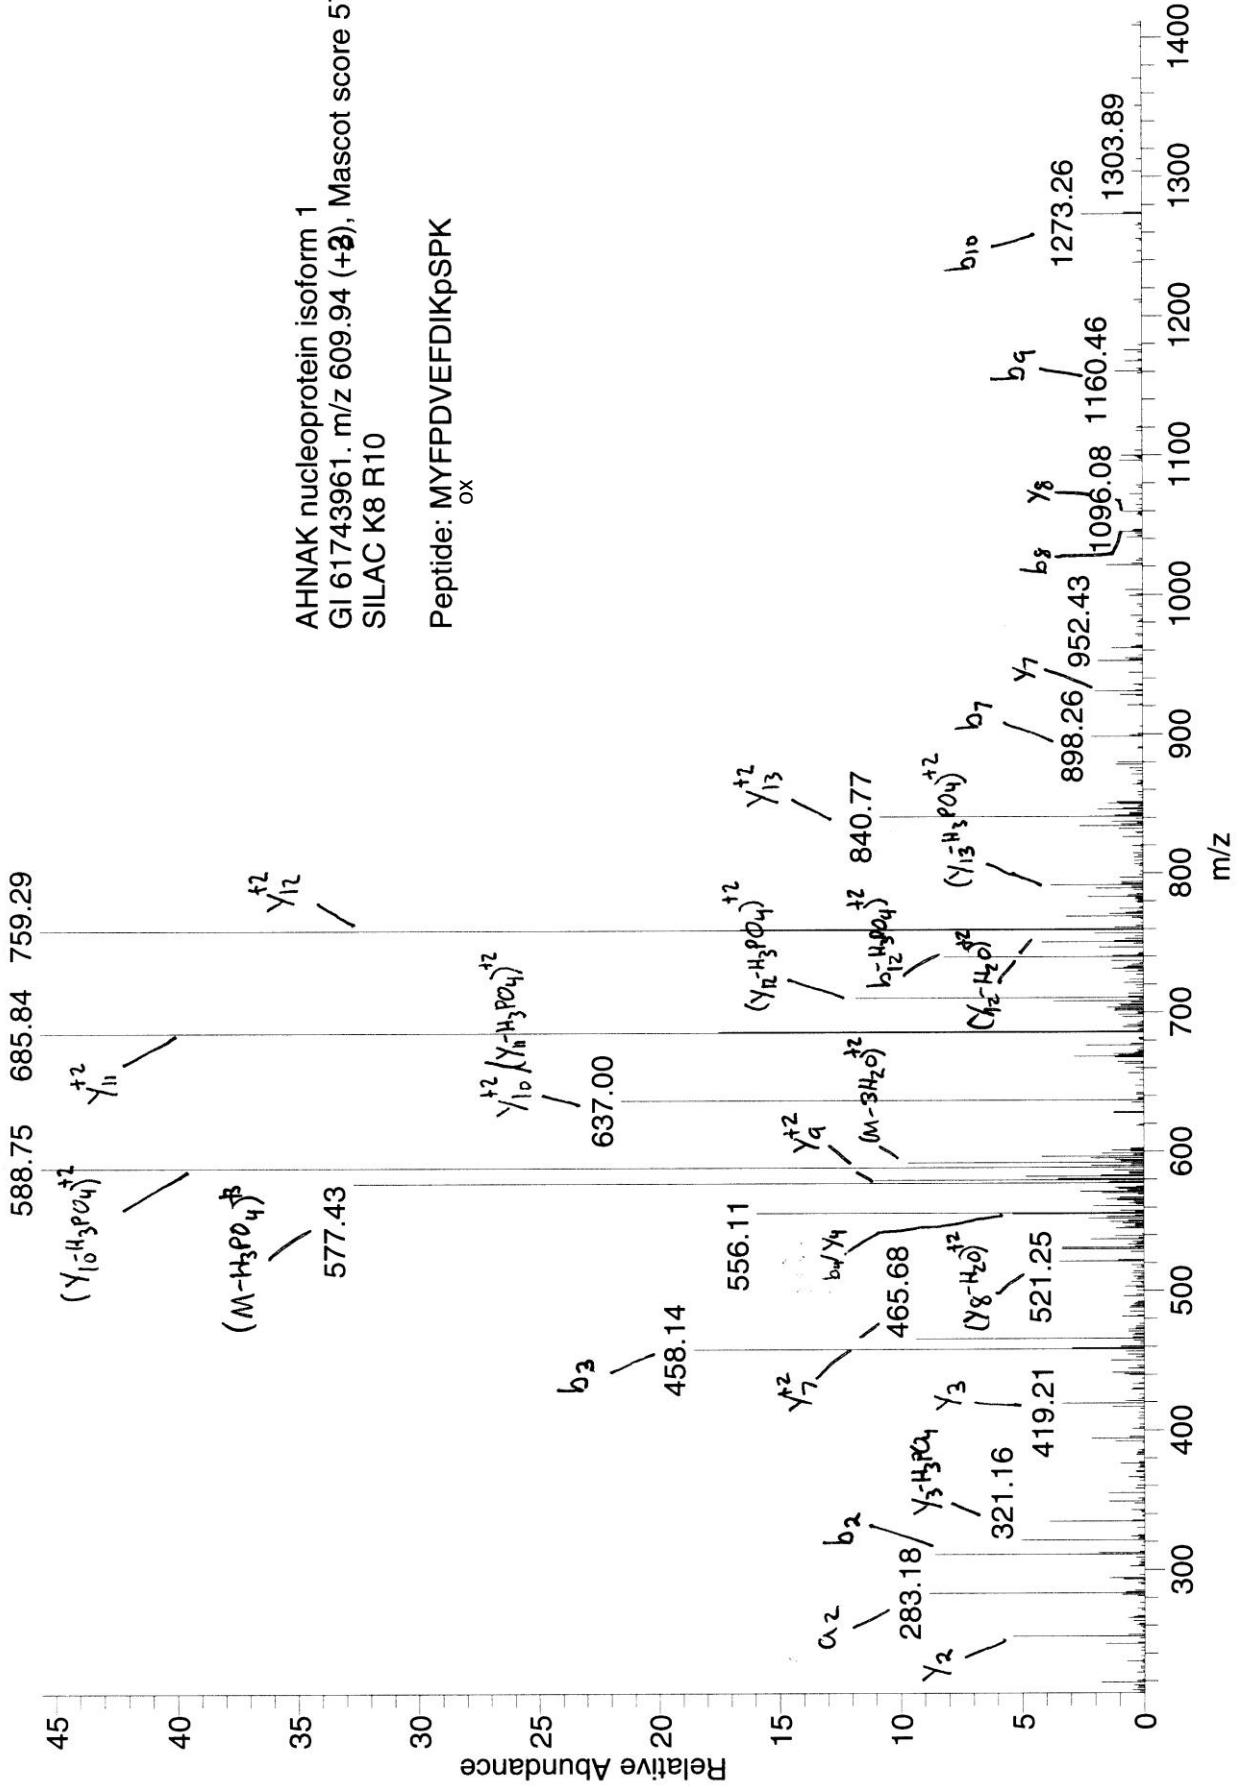

AHNAK nucleoprotein isoform 1  
 GI 61743961. m/z 609.94 (+2), Mascot score 57  
 SILAC K8 R10

Peptide: MYFPDVEFDIKpSPK<sub>ox</sub>

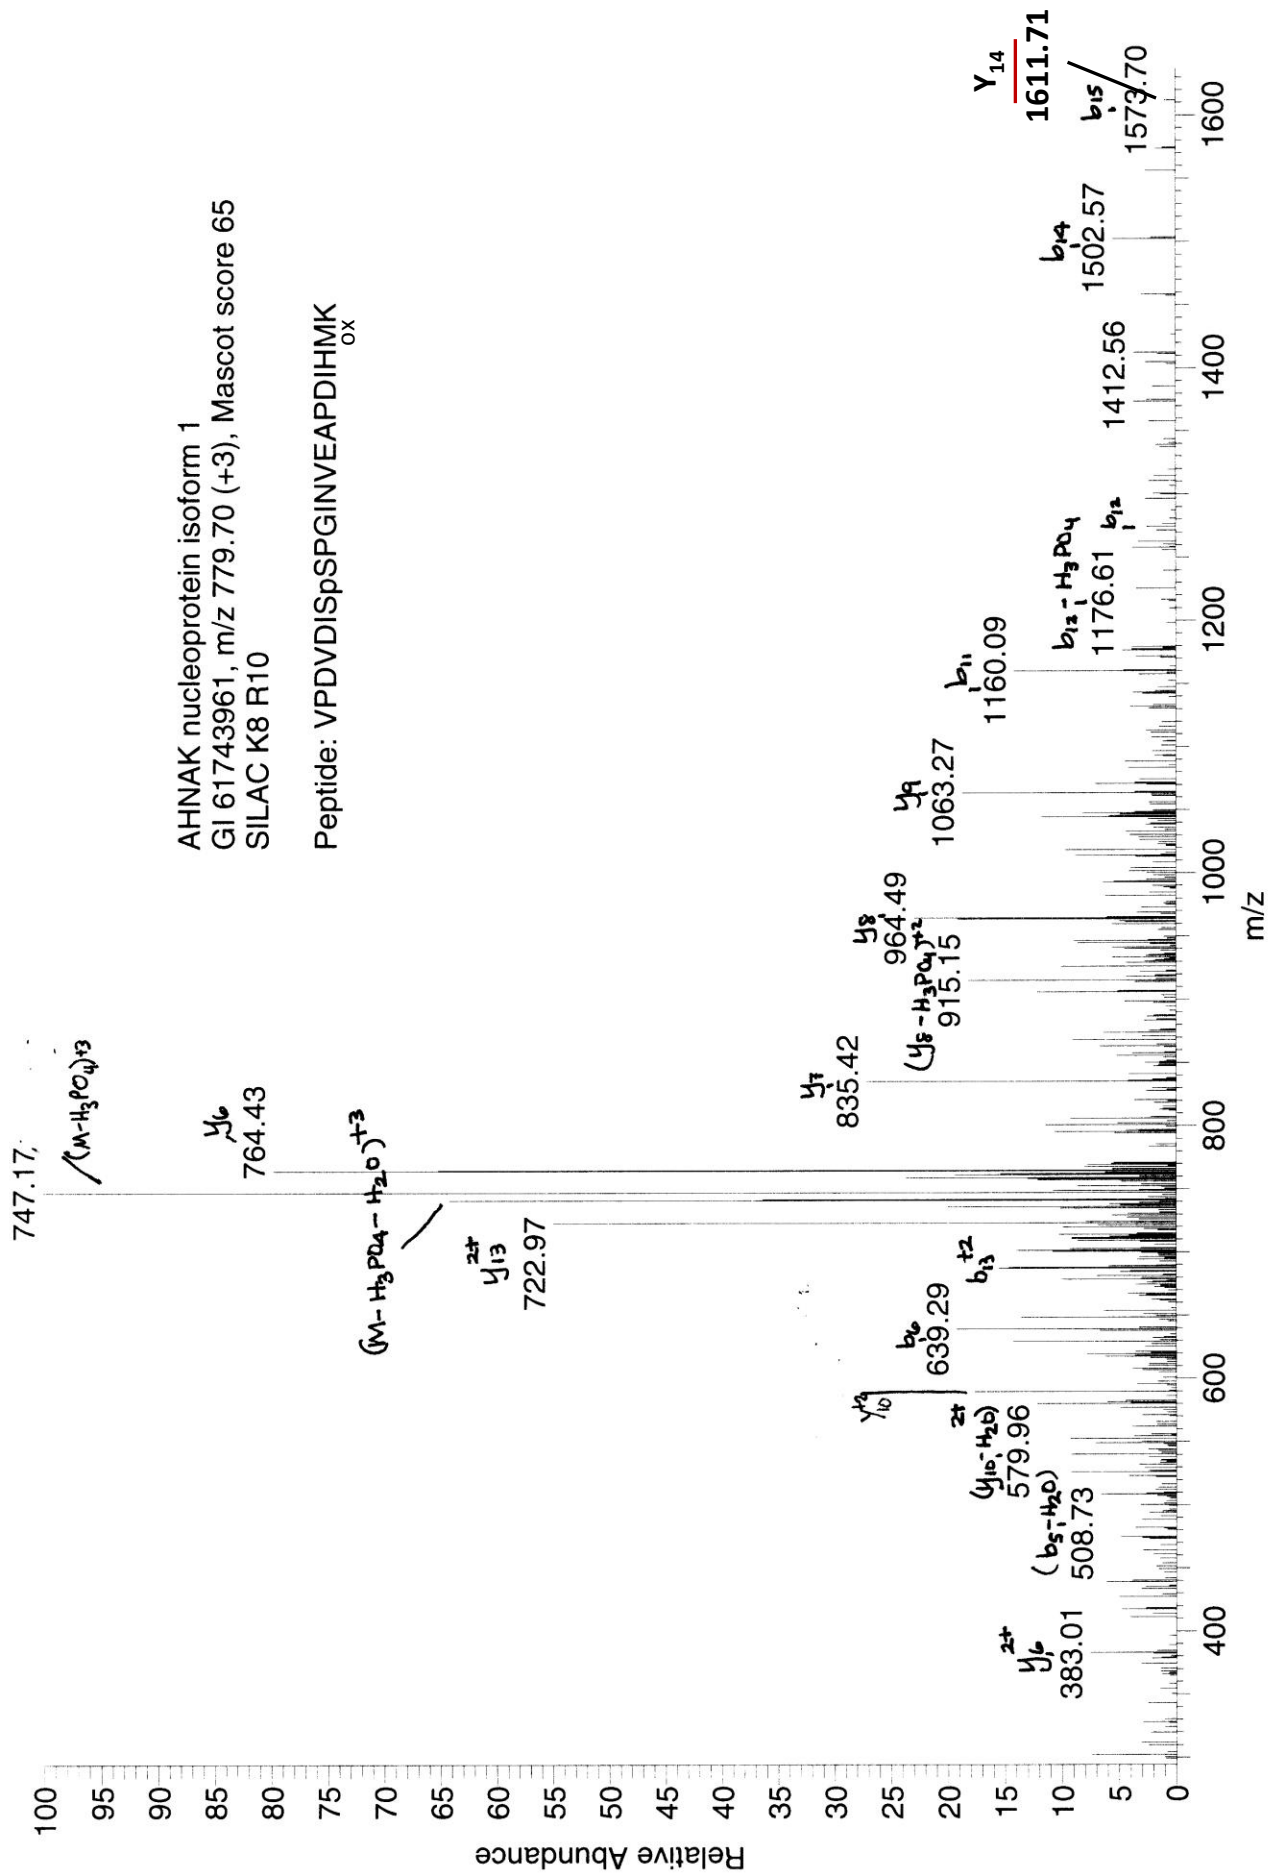

AHNAK nucleoprotein isoform 1  
 GI 61743961, m/z 779.70 (+3), Mascot score 65  
 SILAC K8 R10

Peptide: VPDVDISpSPGINVEAPDIHMK<sub>ox</sub>



AHNAK nucleoprotein 2  
 GI 187951959, m/z 1128.55 (+2), Mascot score 48  
 SILAC K8 R10

Peptide: ESEIPASTIQpTPSYGFSLLK

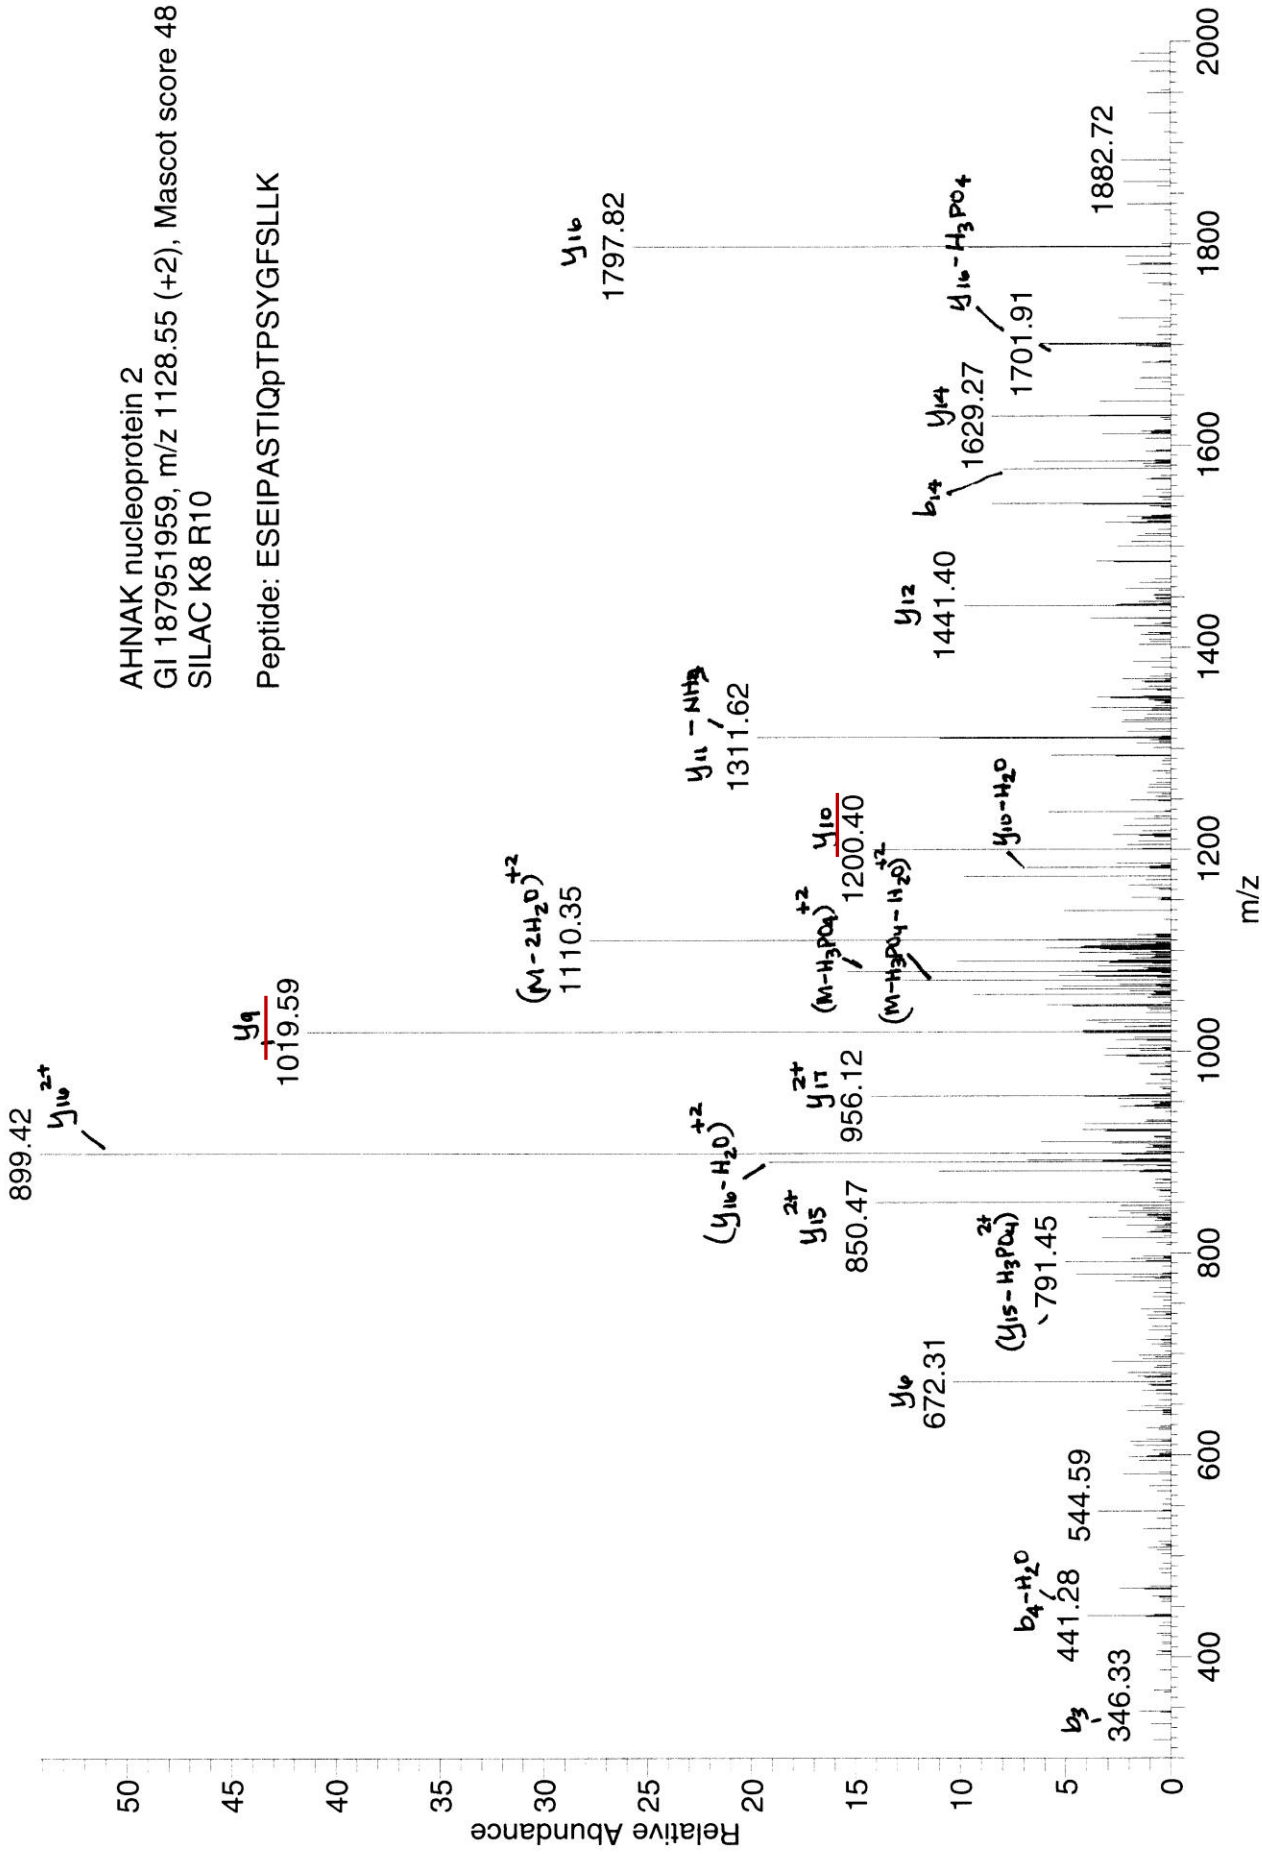

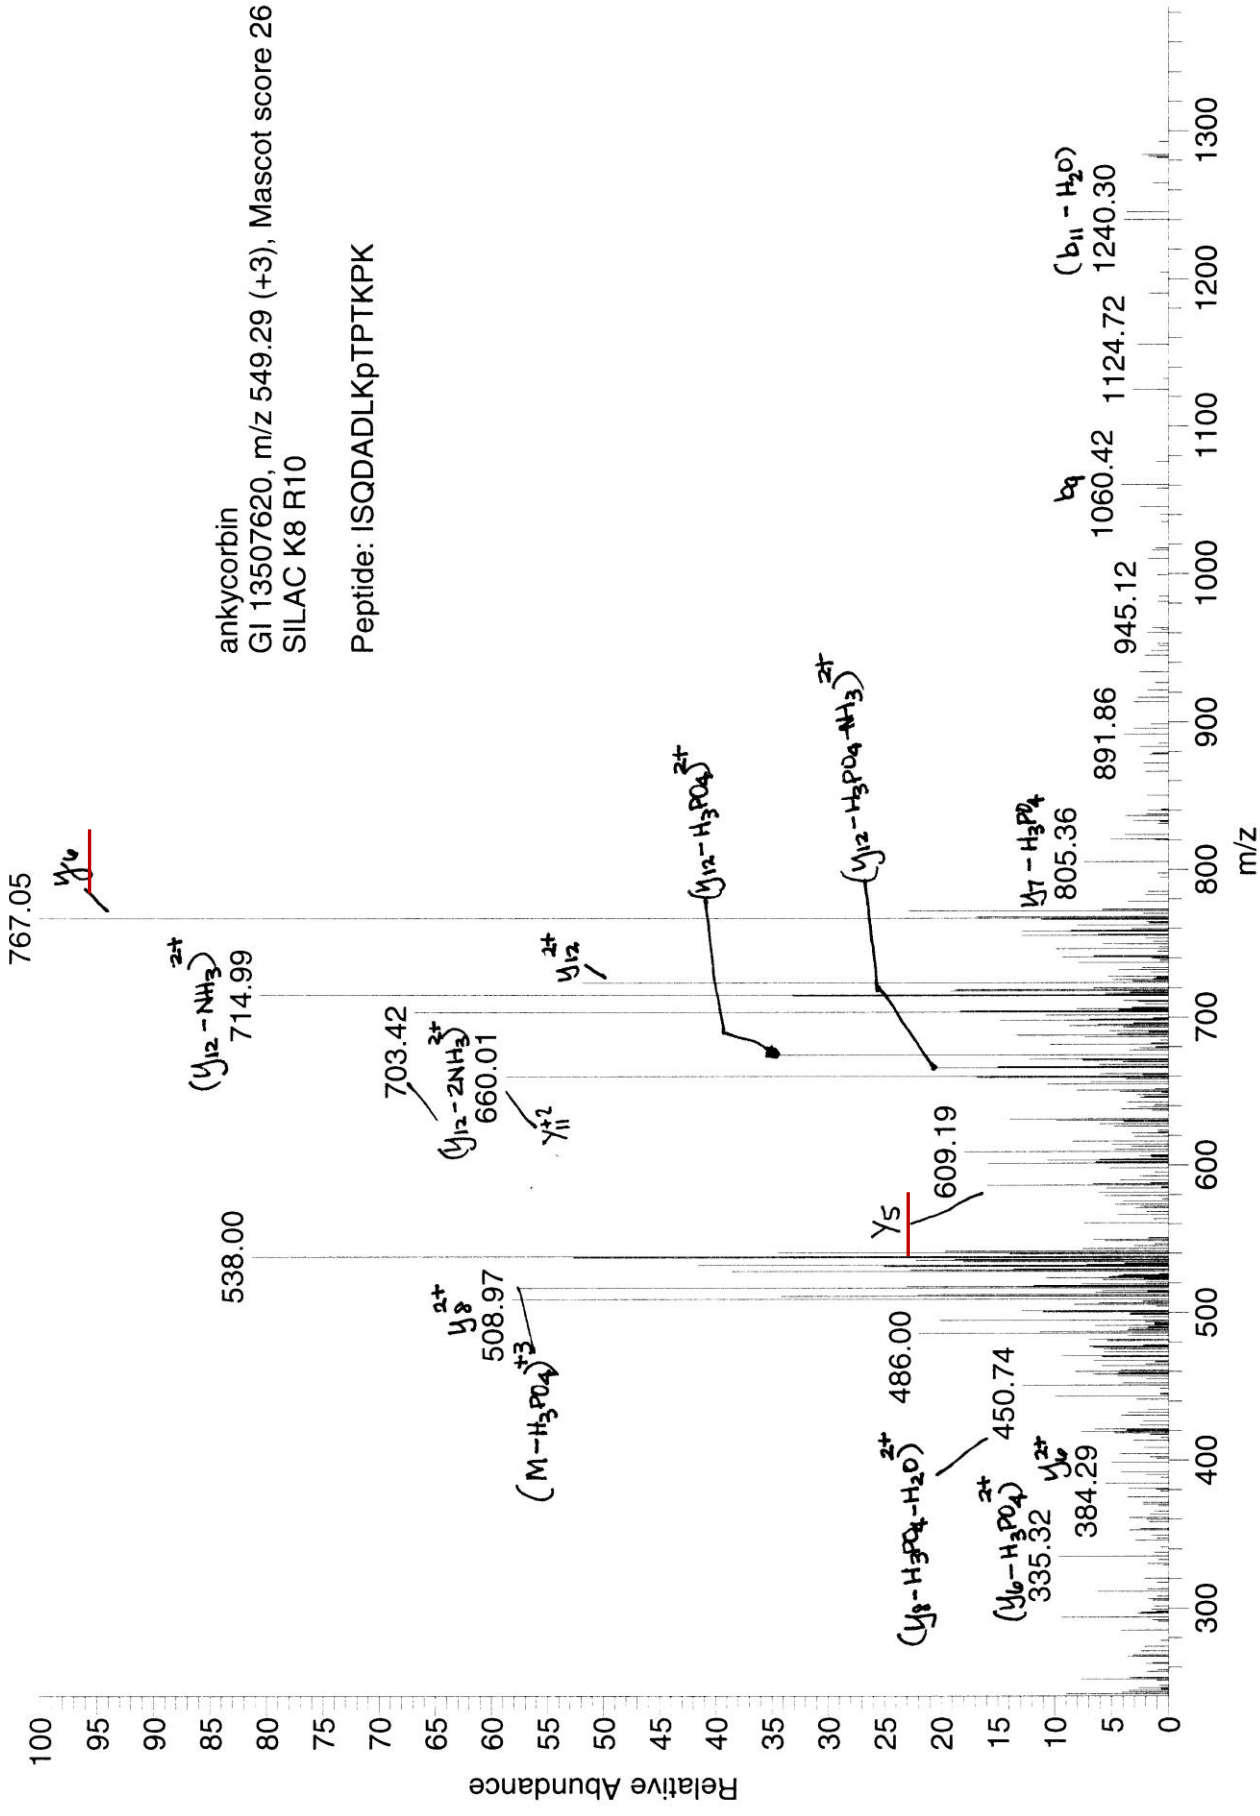

ankycorbin  
 GI 13507620, m/z 549.29 (+3), Mascot score 26  
 SILAC K8 R10

Peptide: ISQDADLKpTPTKPK

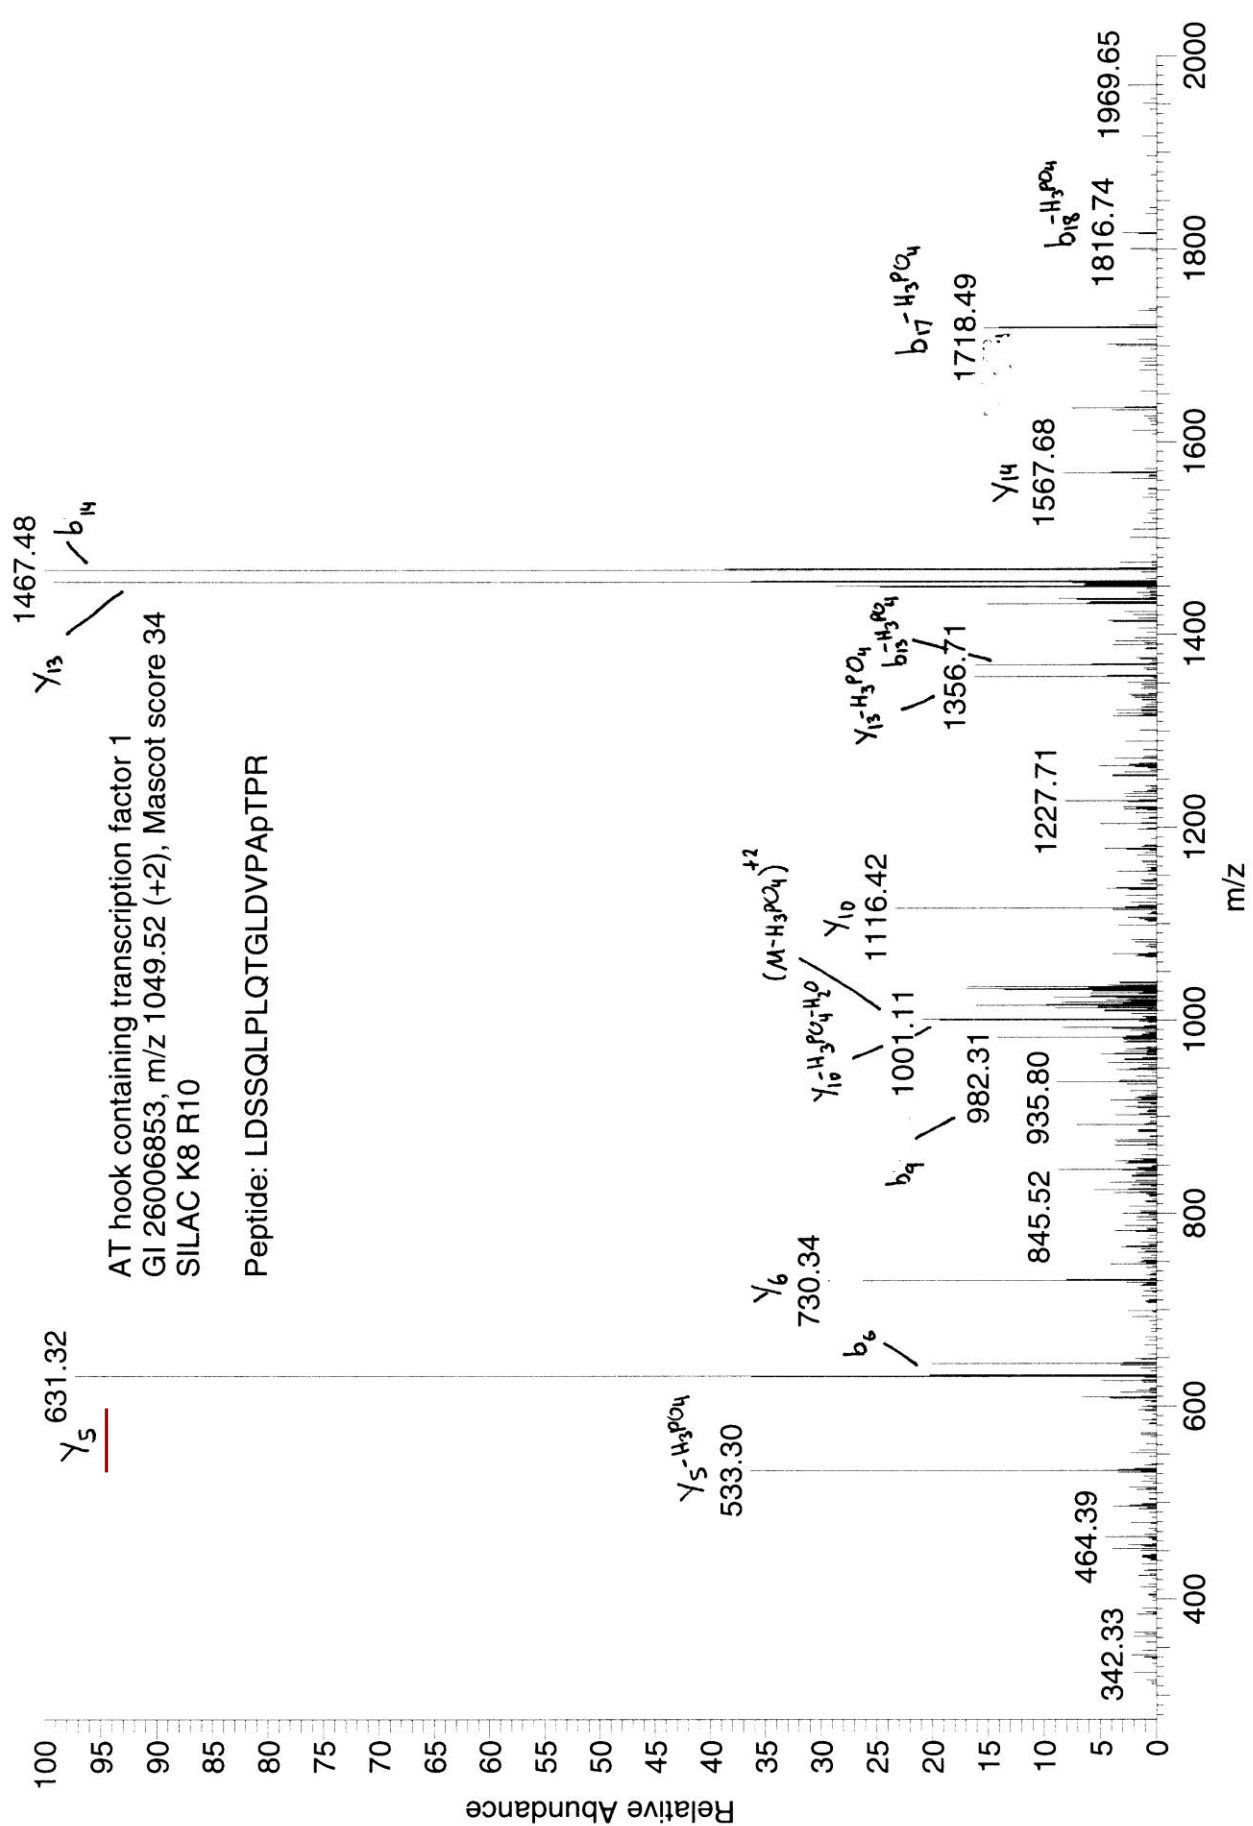

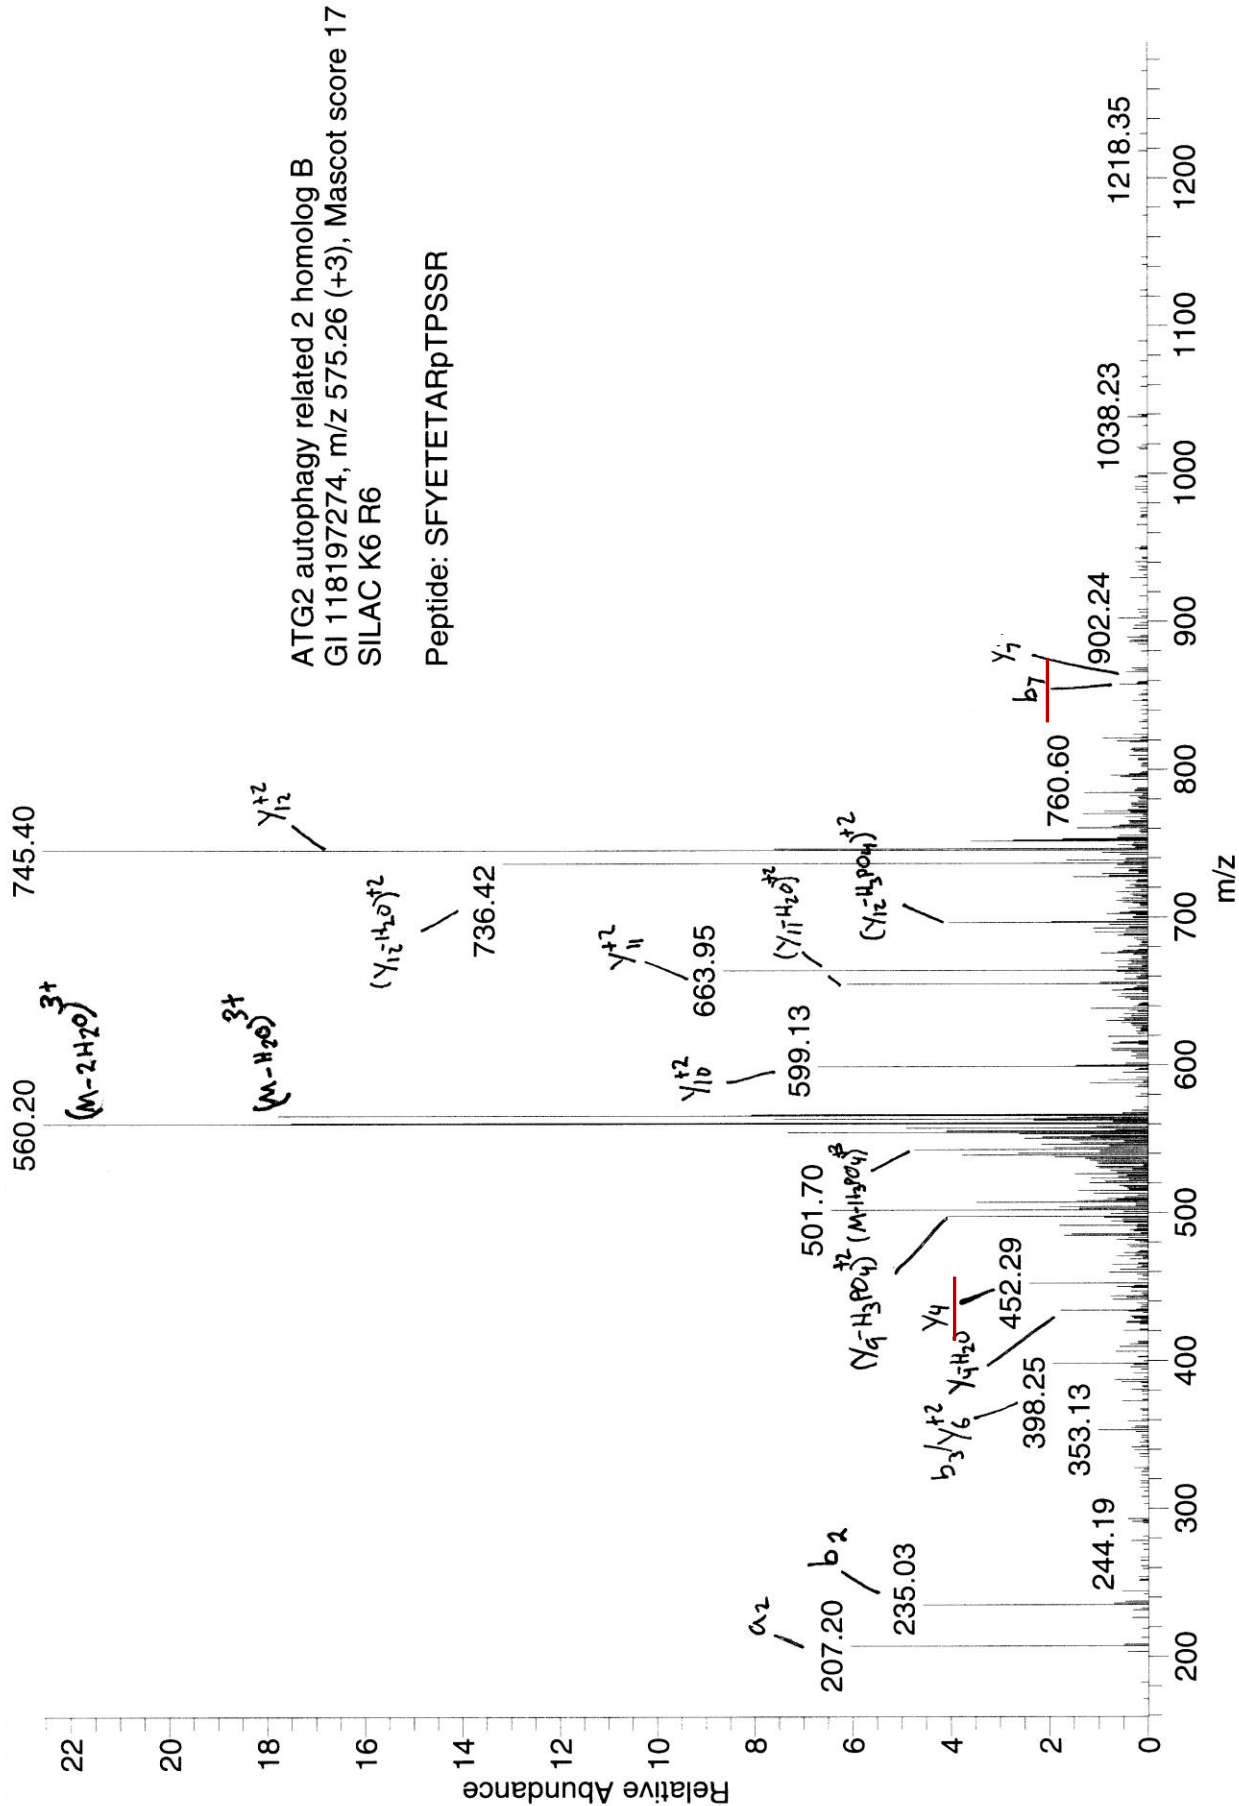

ATG2 autophagy related 2 homolog B  
 GI 118197274, m/z 575.26 (+3), Mascot score 17  
 SILAC K6 R6

Peptide: SFYETETARpTPSSR

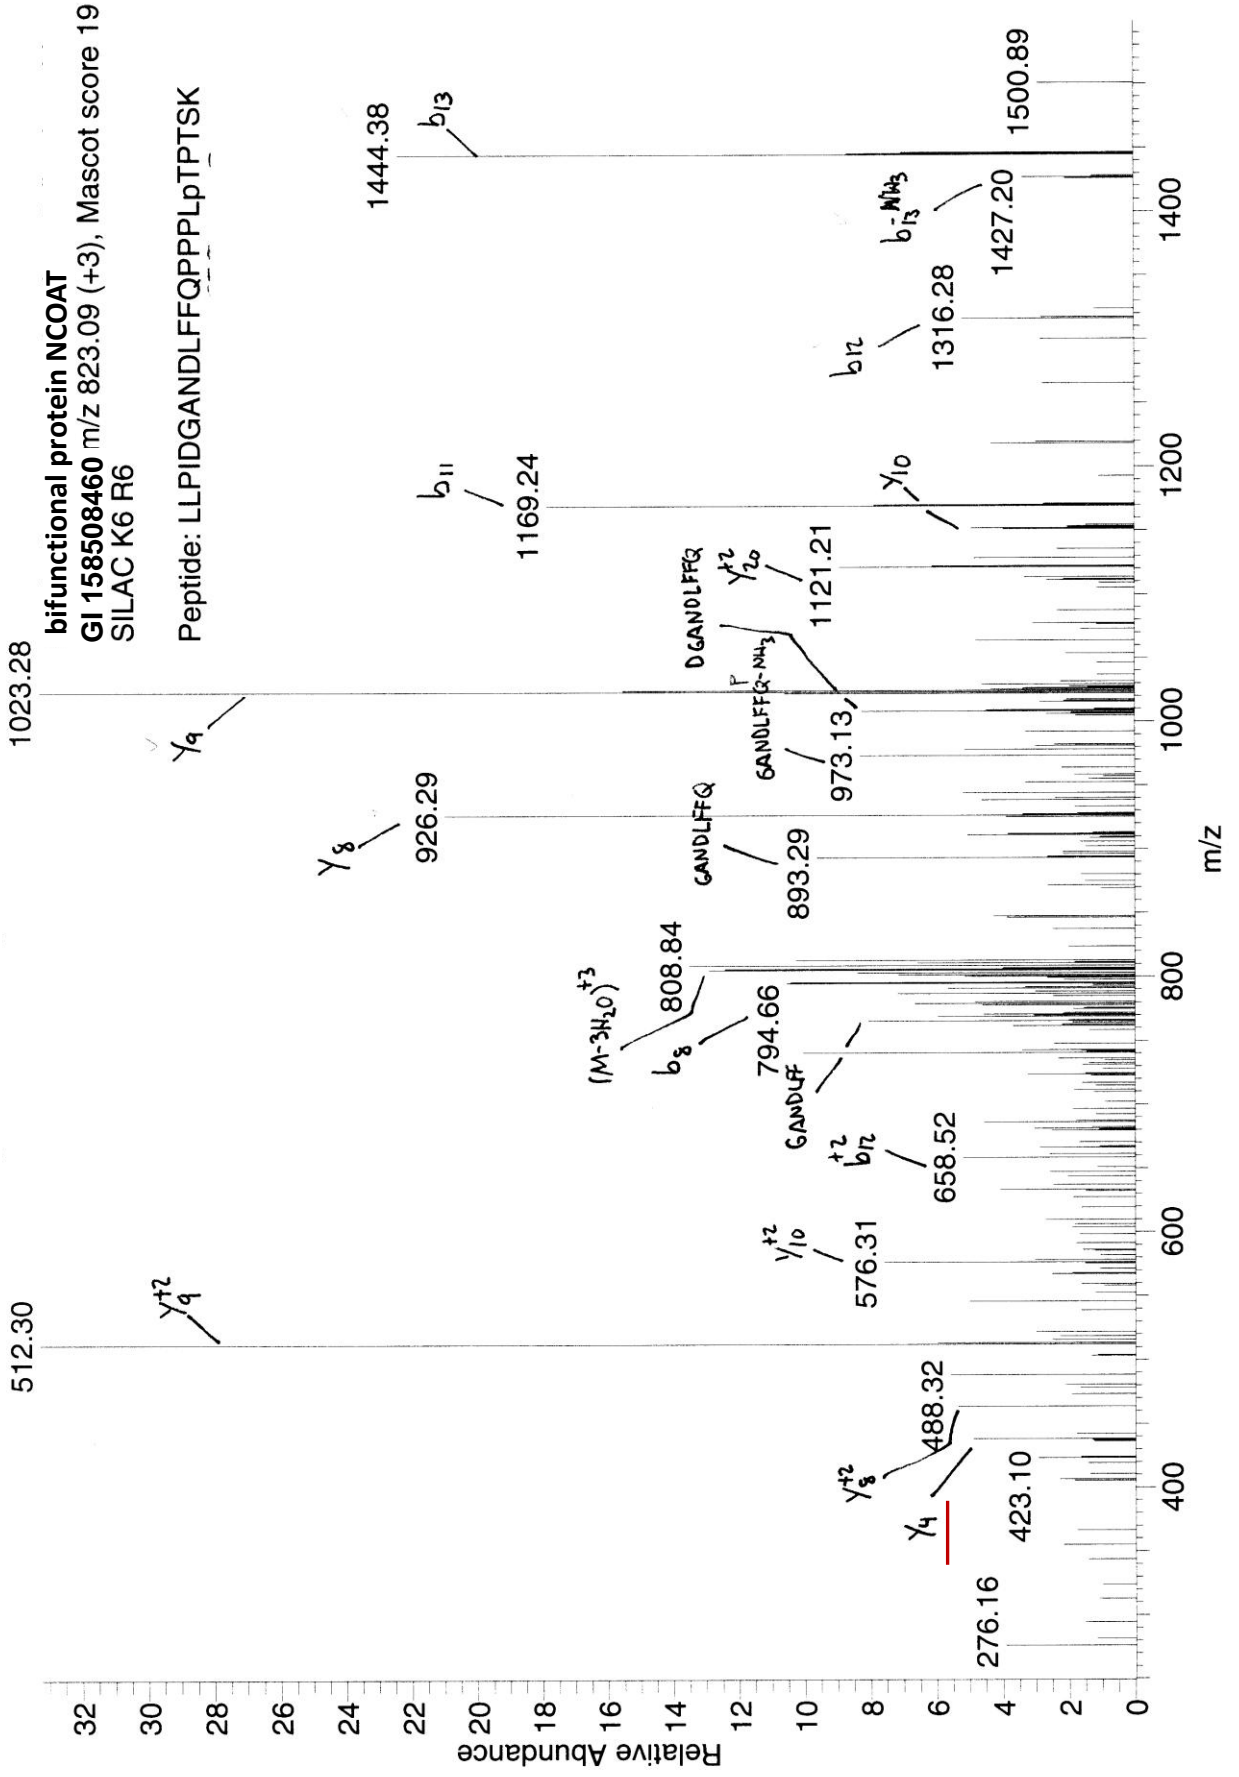

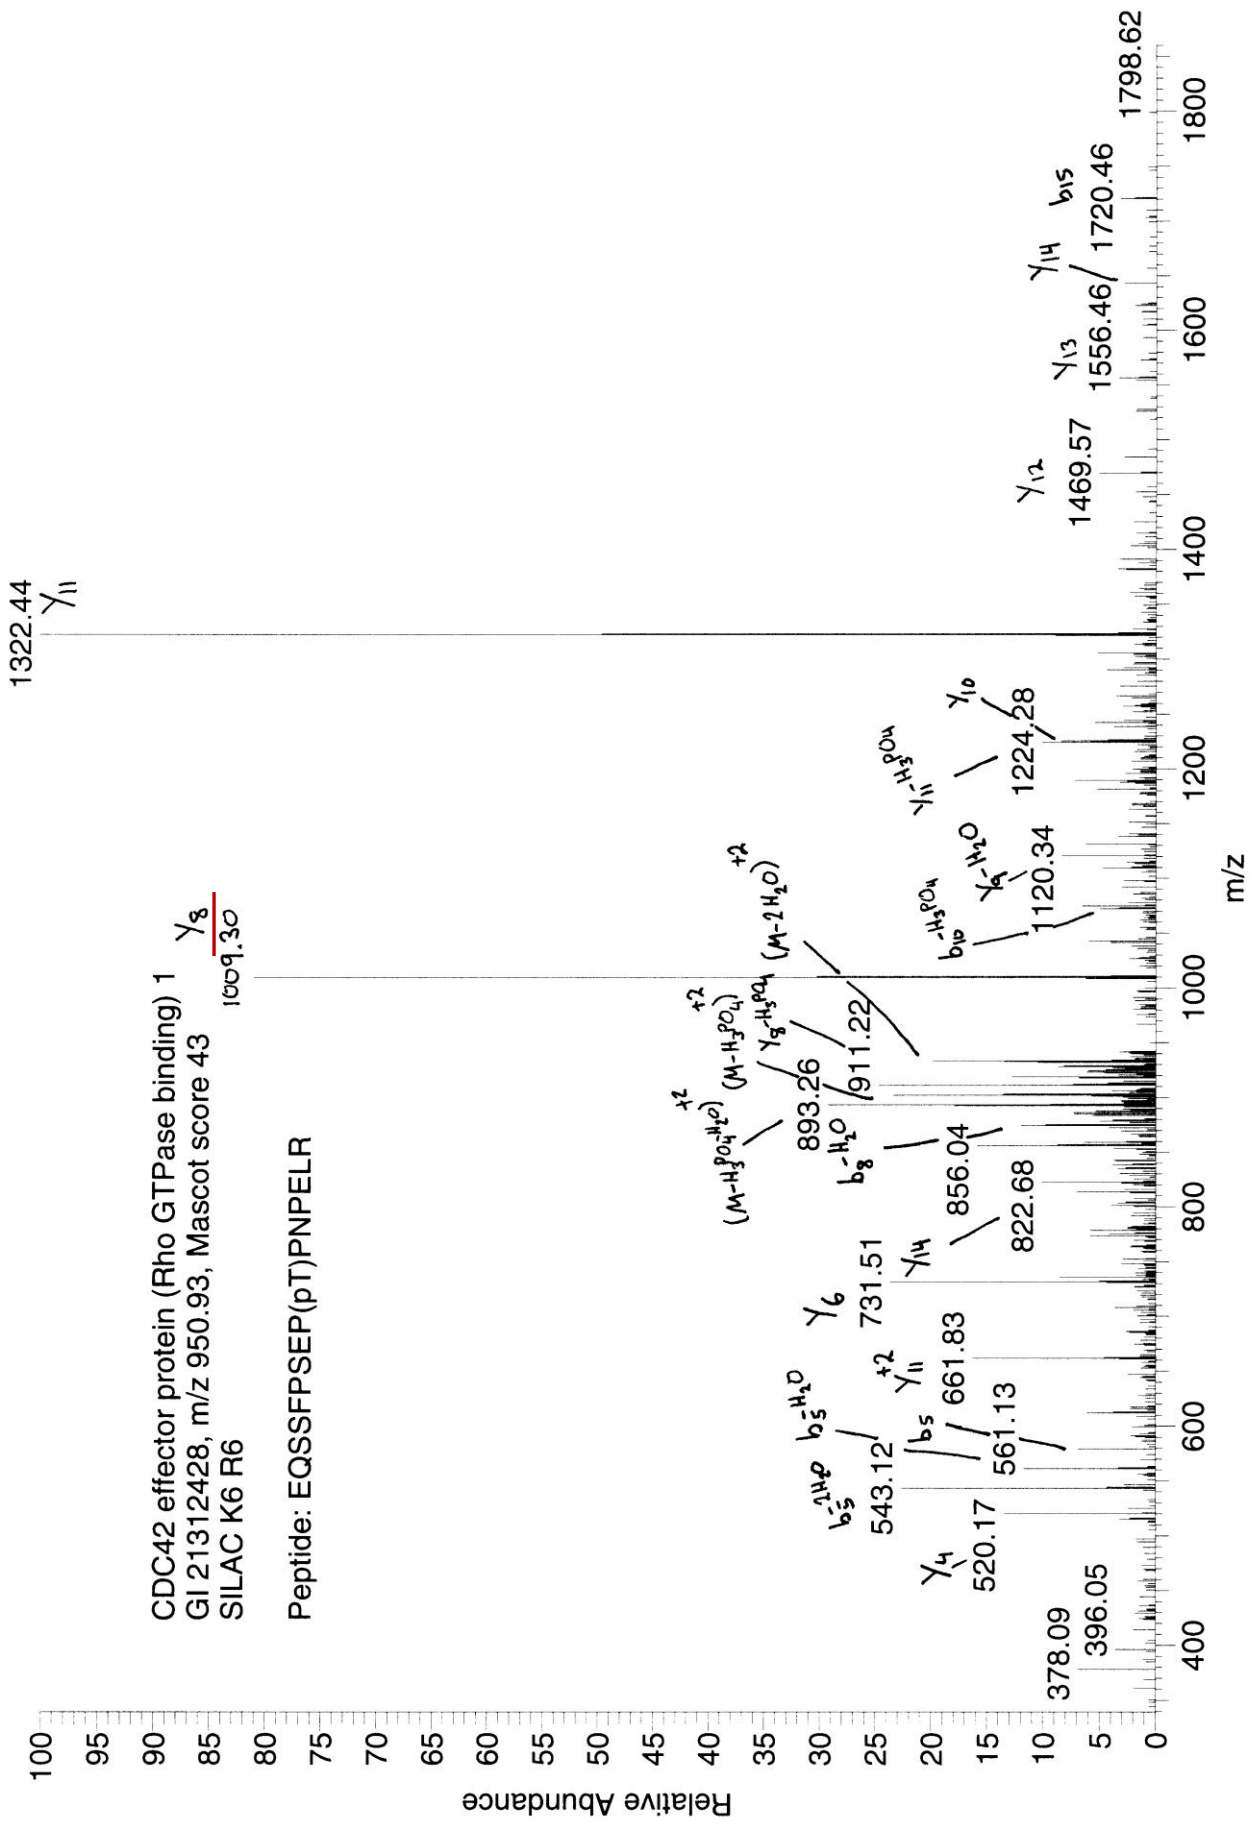

CDC42 effector protein (Rho GTPase binding) 1  
 GI 21312428, m/z 950.93, Mascot score 43  
 SILAC K6 R6

Peptide: EQSSFPEP(pT)PNPELR

$\gamma_8$   
 1009.30



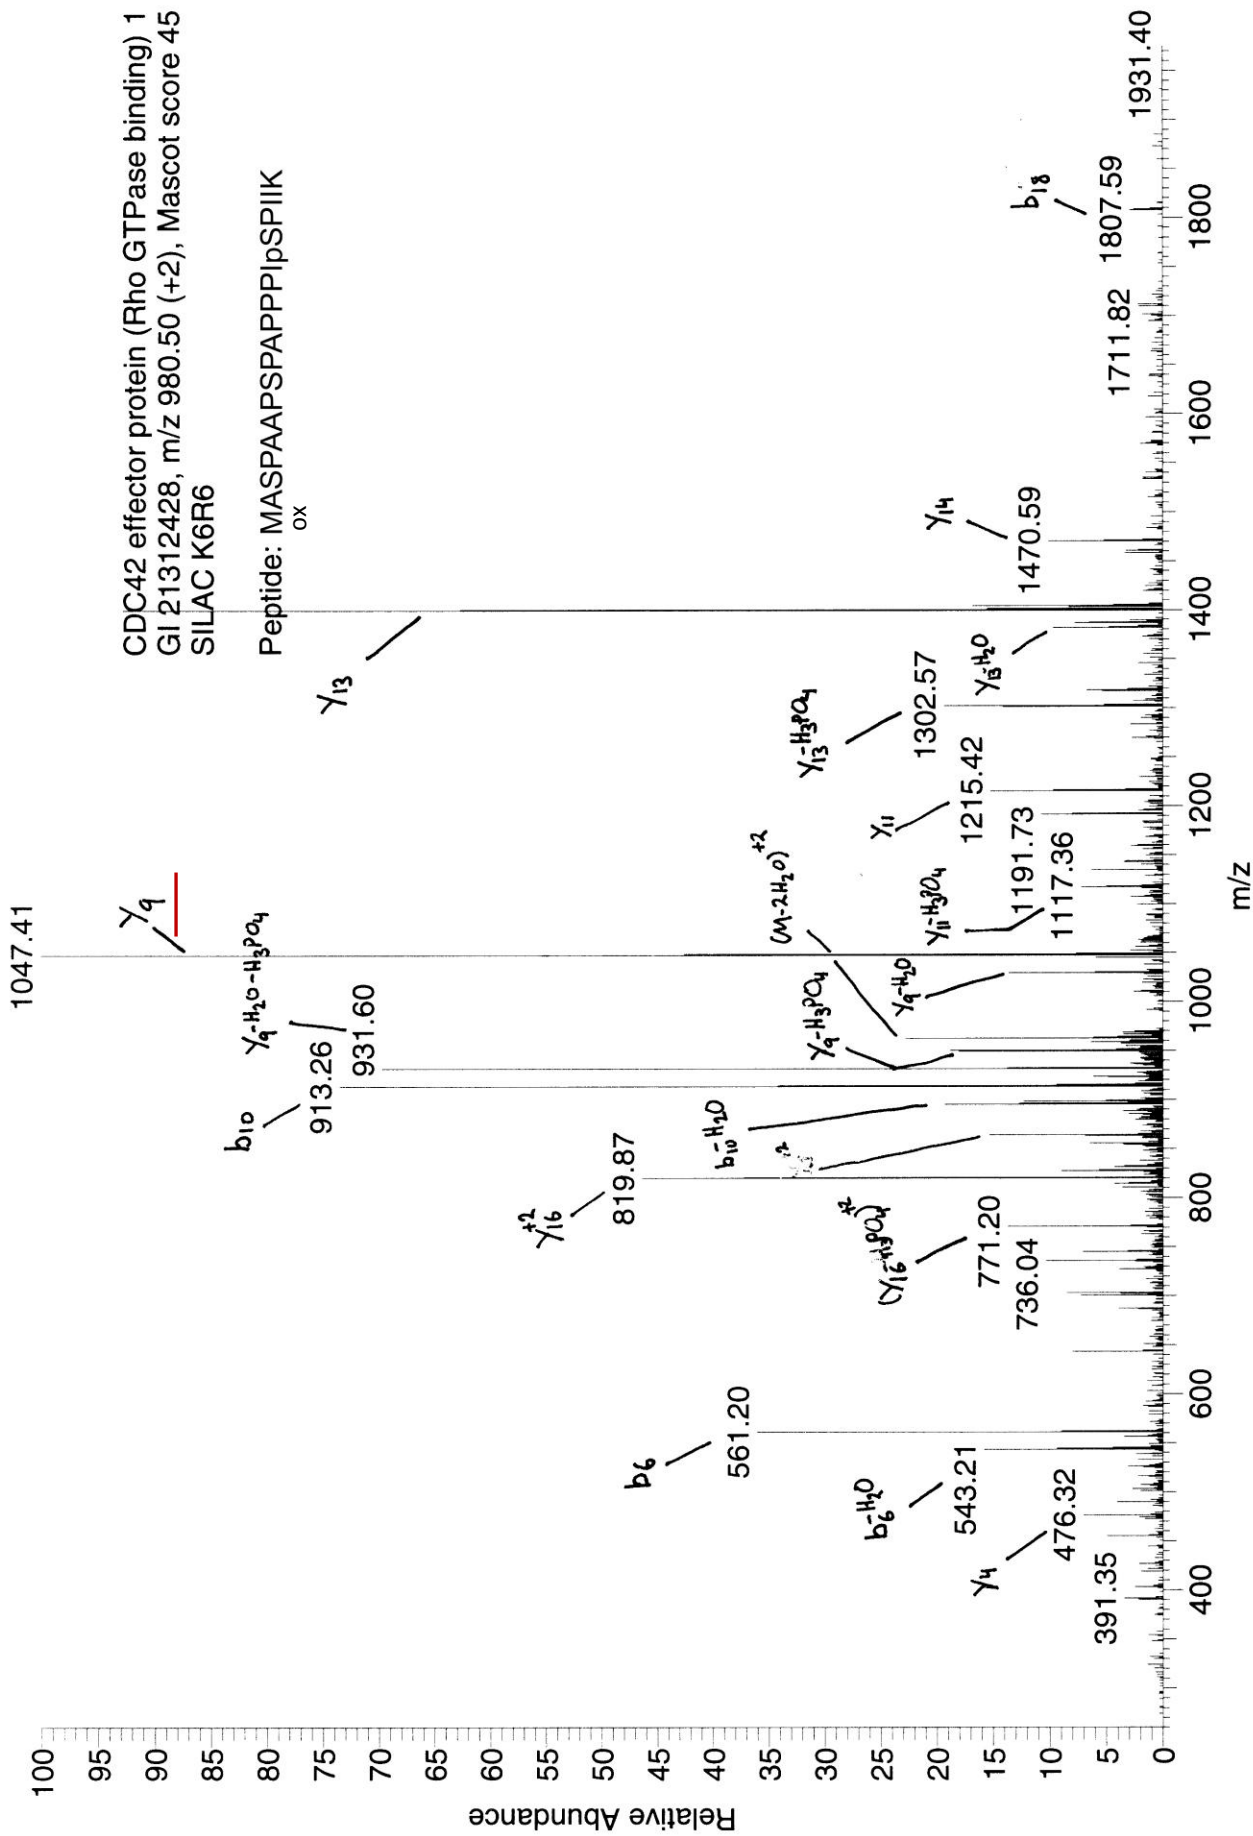

CDC42 effector protein (Rho GTPase binding) 2  
 GI 22779864, 635.33 (+2), Mascot score 38  
 SILAC K8 R10

Peptide: ELPDGLpSPLLK

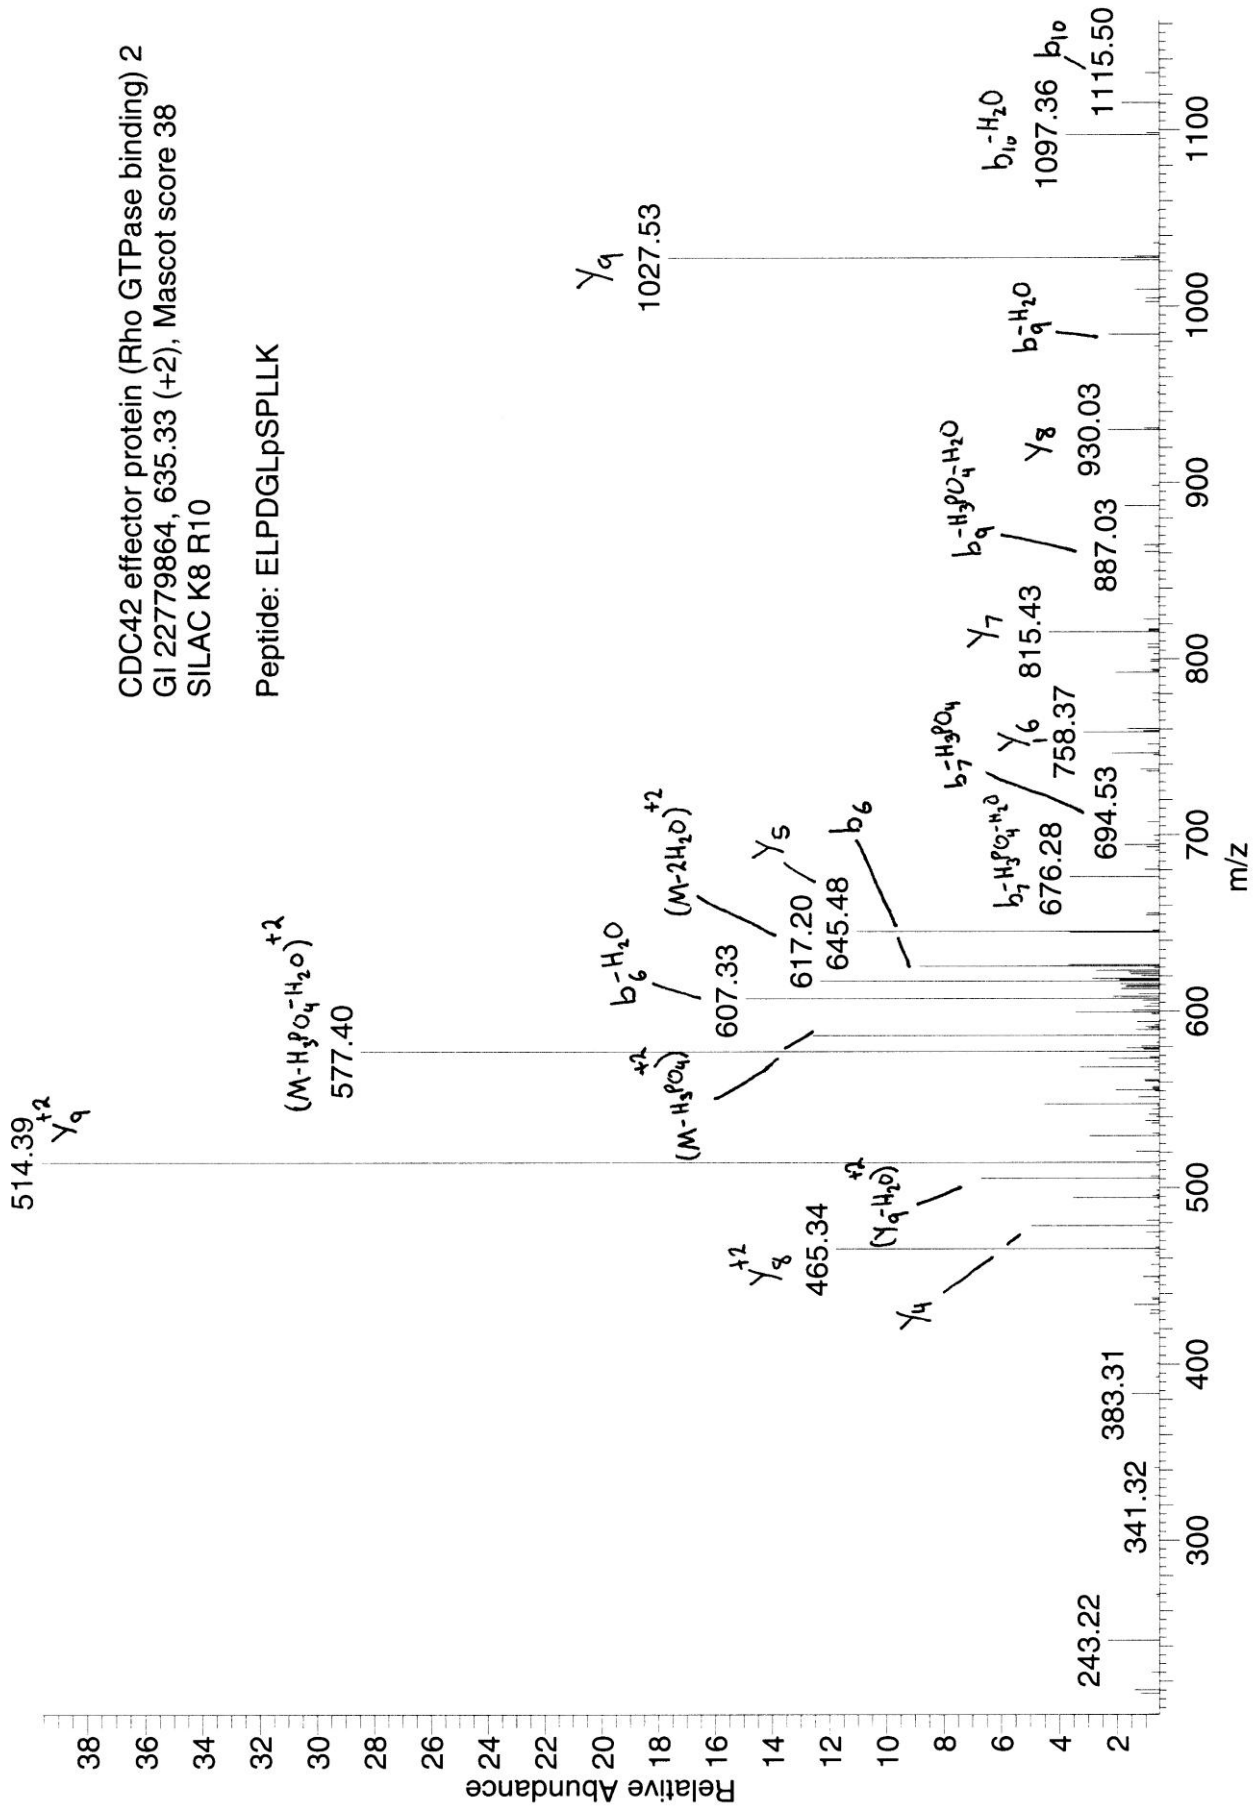

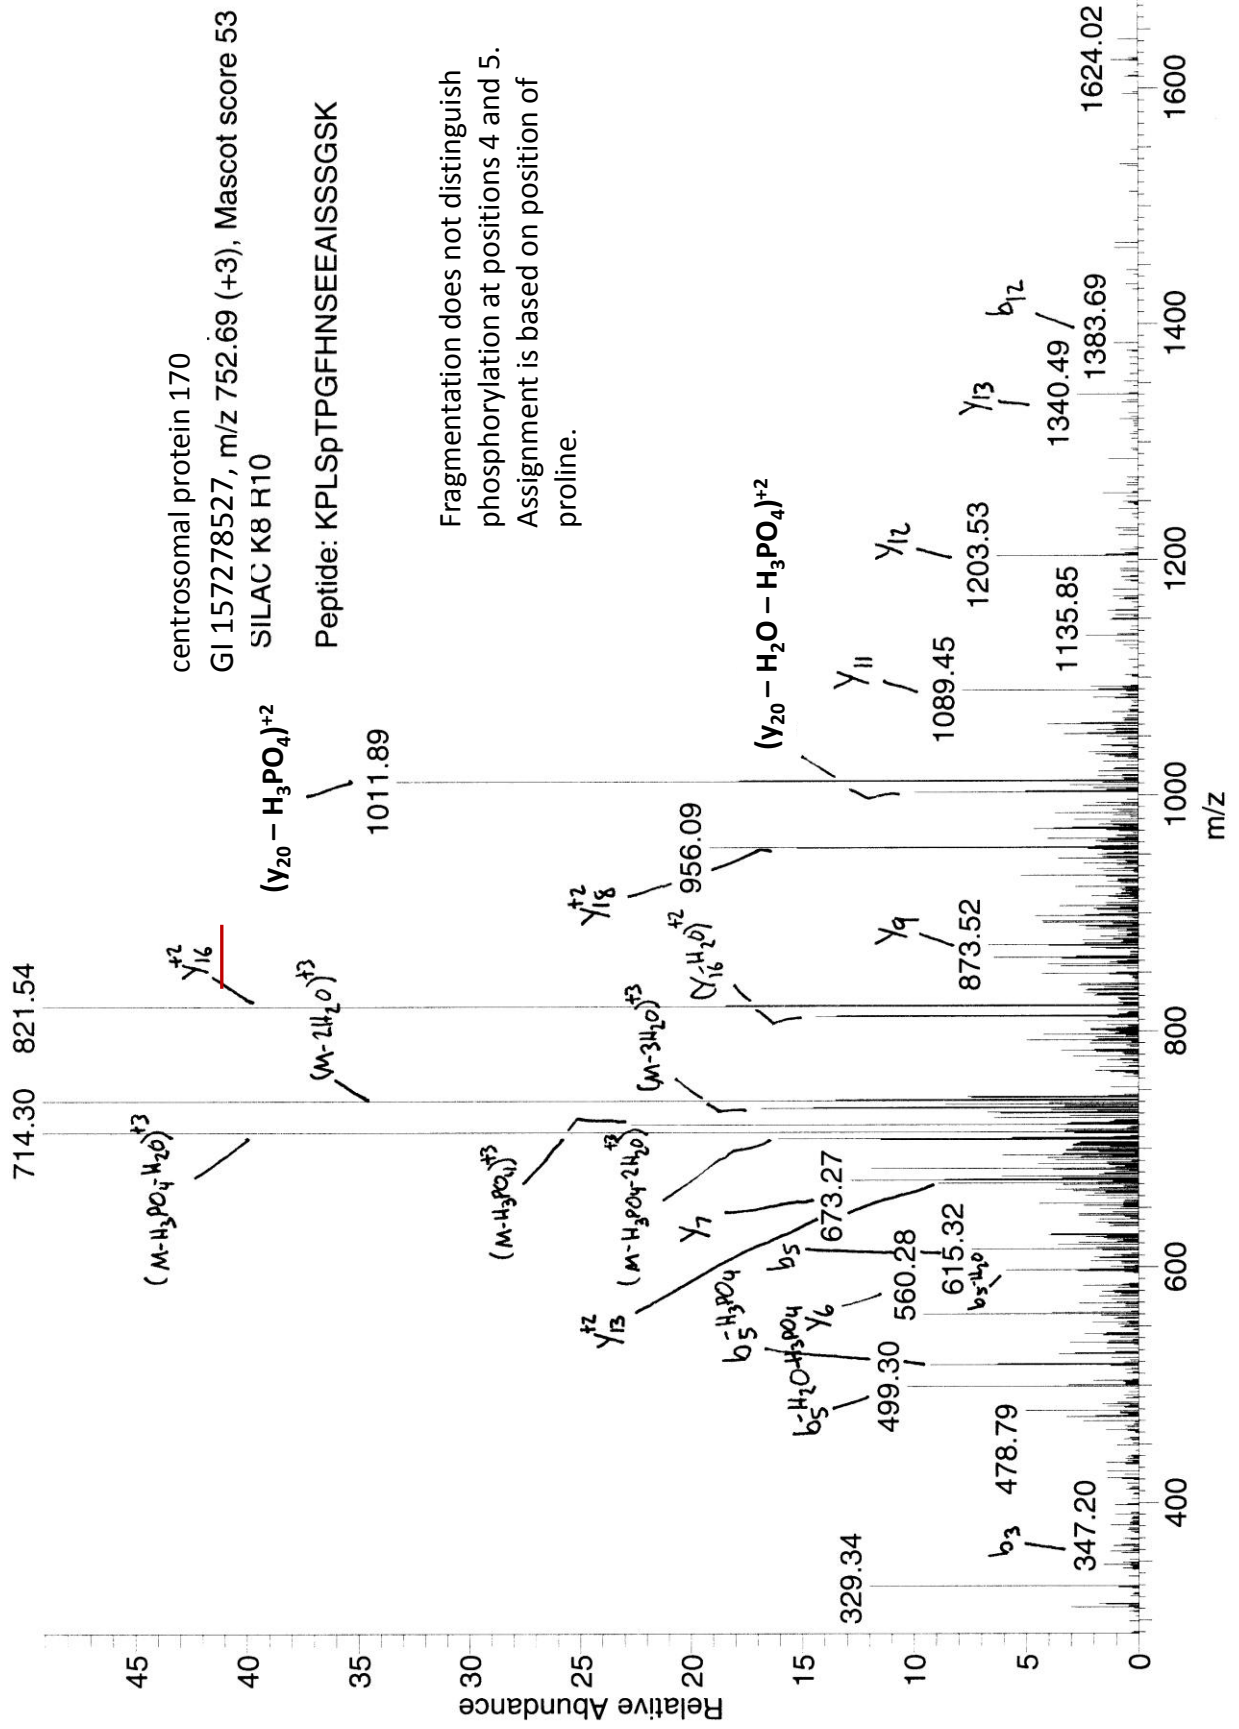

centrosomal protein 170

GI 157278527, m/z 752.69 (+3), Mascot score 53  
SILAC K8 R10

Peptide: KPLSpTPGFHNSEEAISSGSK

Fragmentation does not distinguish phosphorylation at positions 4 and 5. Assignment is based on position of proline.

dedicator of cytokinesis 1  
GI 88853584, m/z 1079.01 (+2), Mascot Score 88  
SILAC K8 R10

Peptide: FSVSPASPSSQQTPPPVpTPR

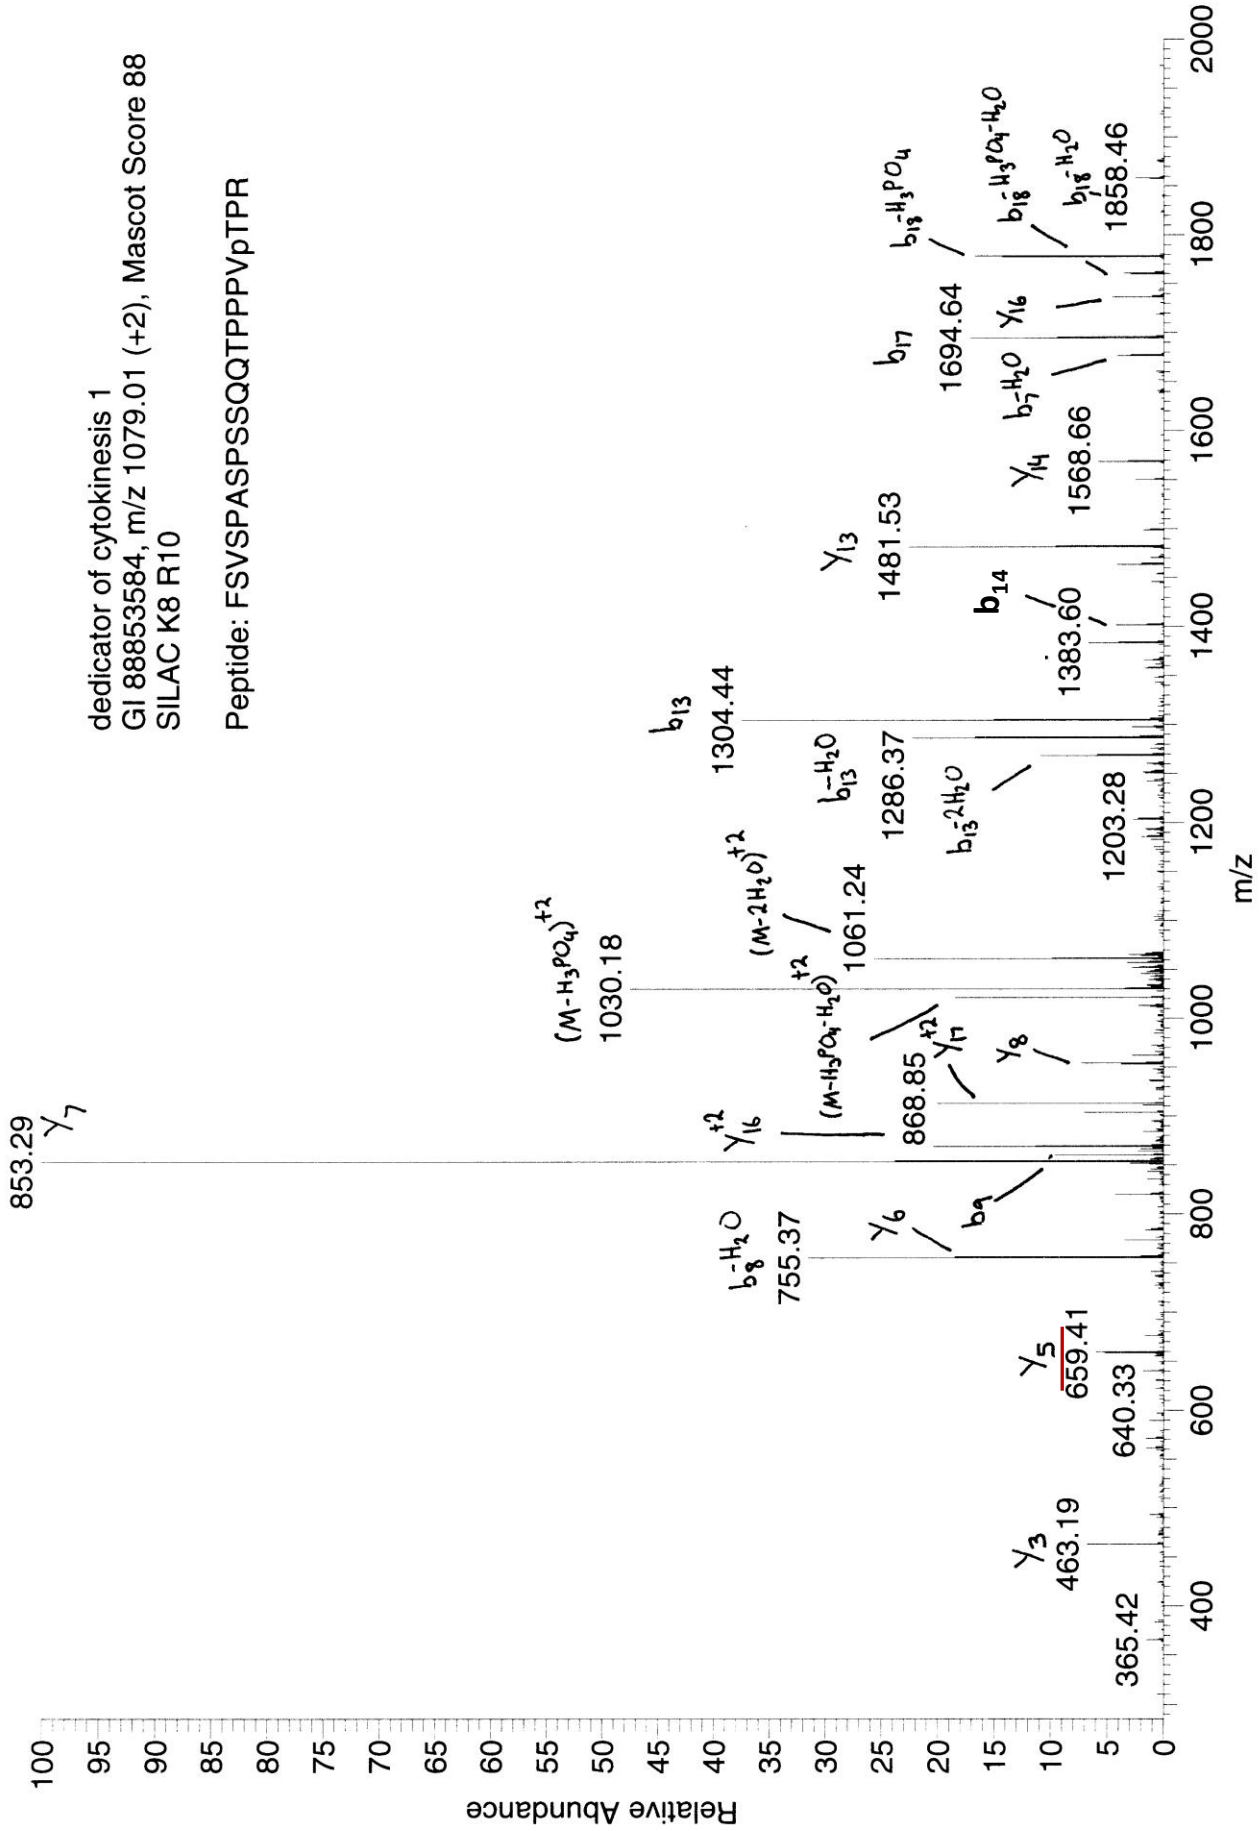

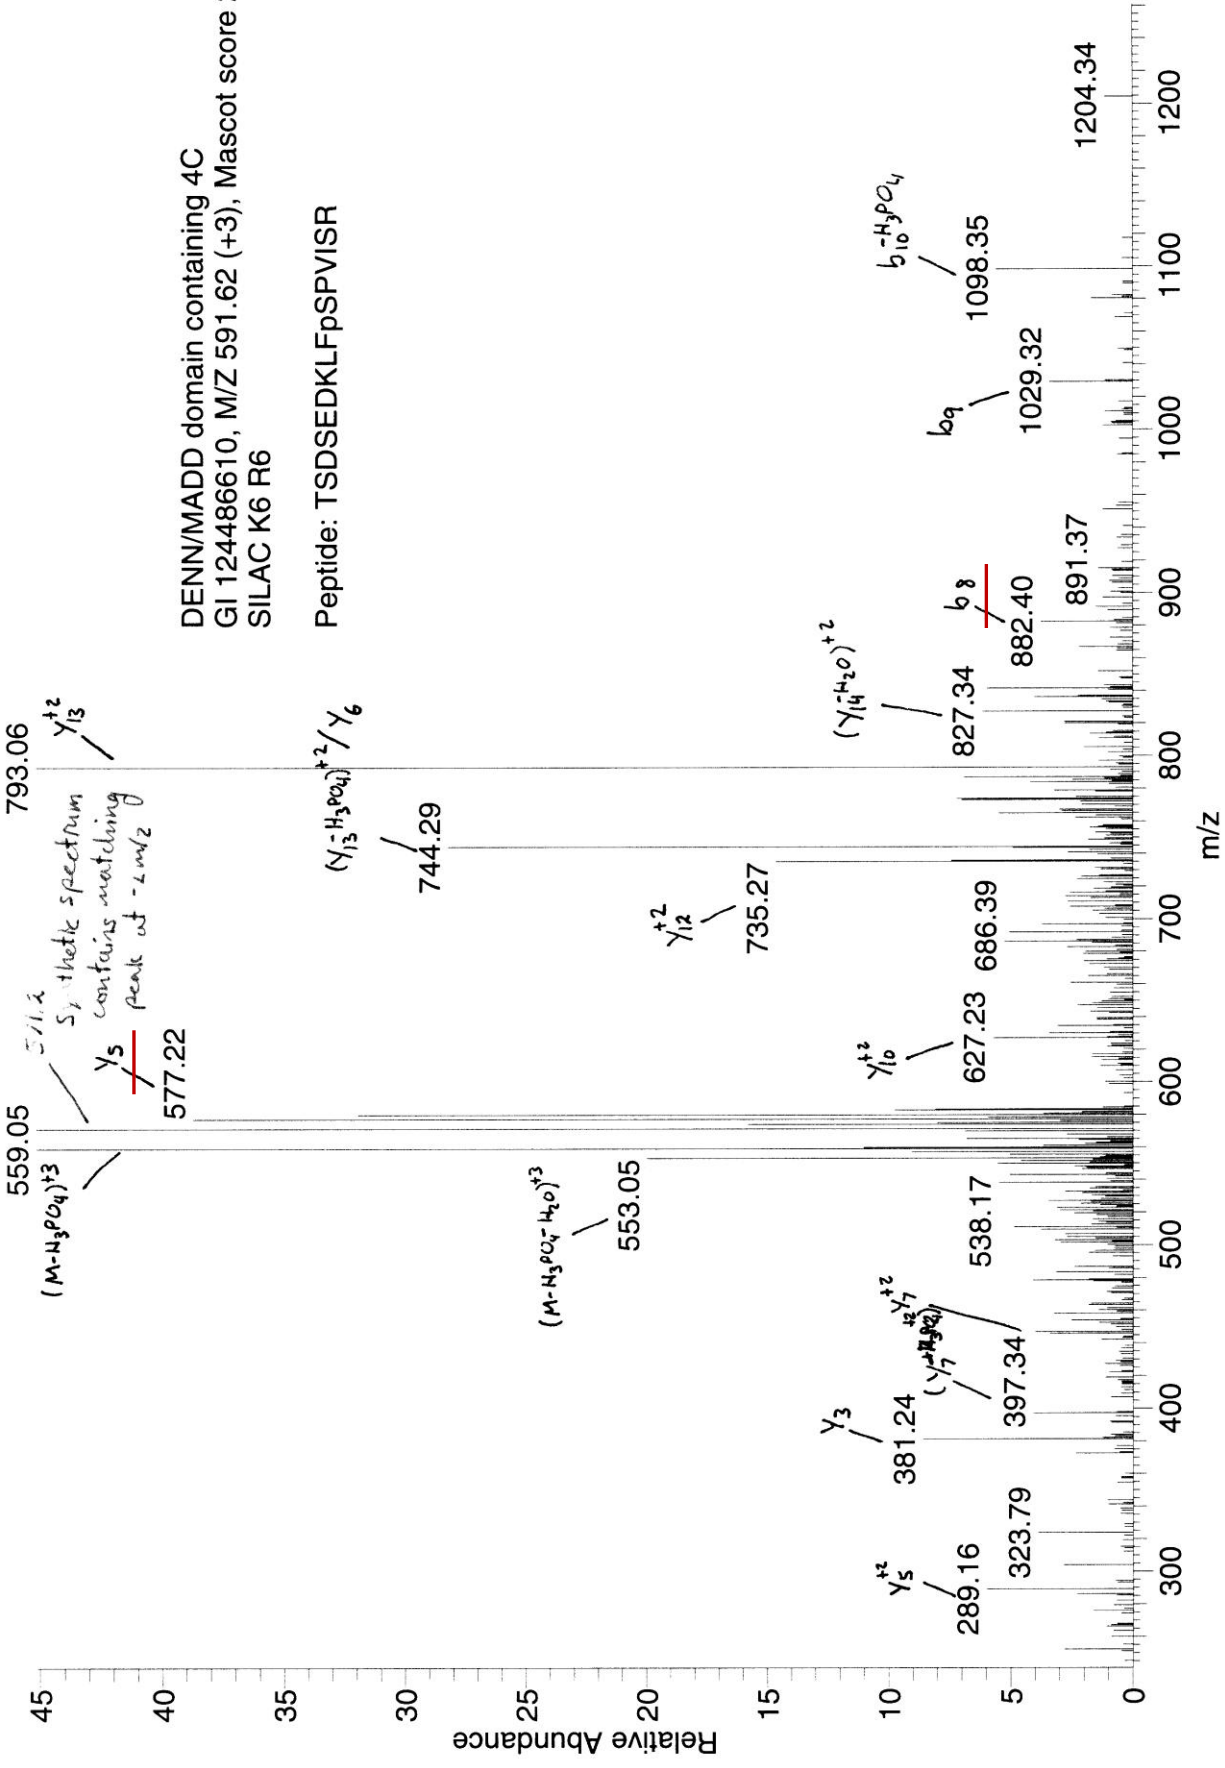

DENN/MADD domain containing 4C  
 GI 124486610, M/Z 591.62 (+3), Mascot score 26  
 SILAC K6 R6

Peptide: TSDSEDKLFPSPVISR

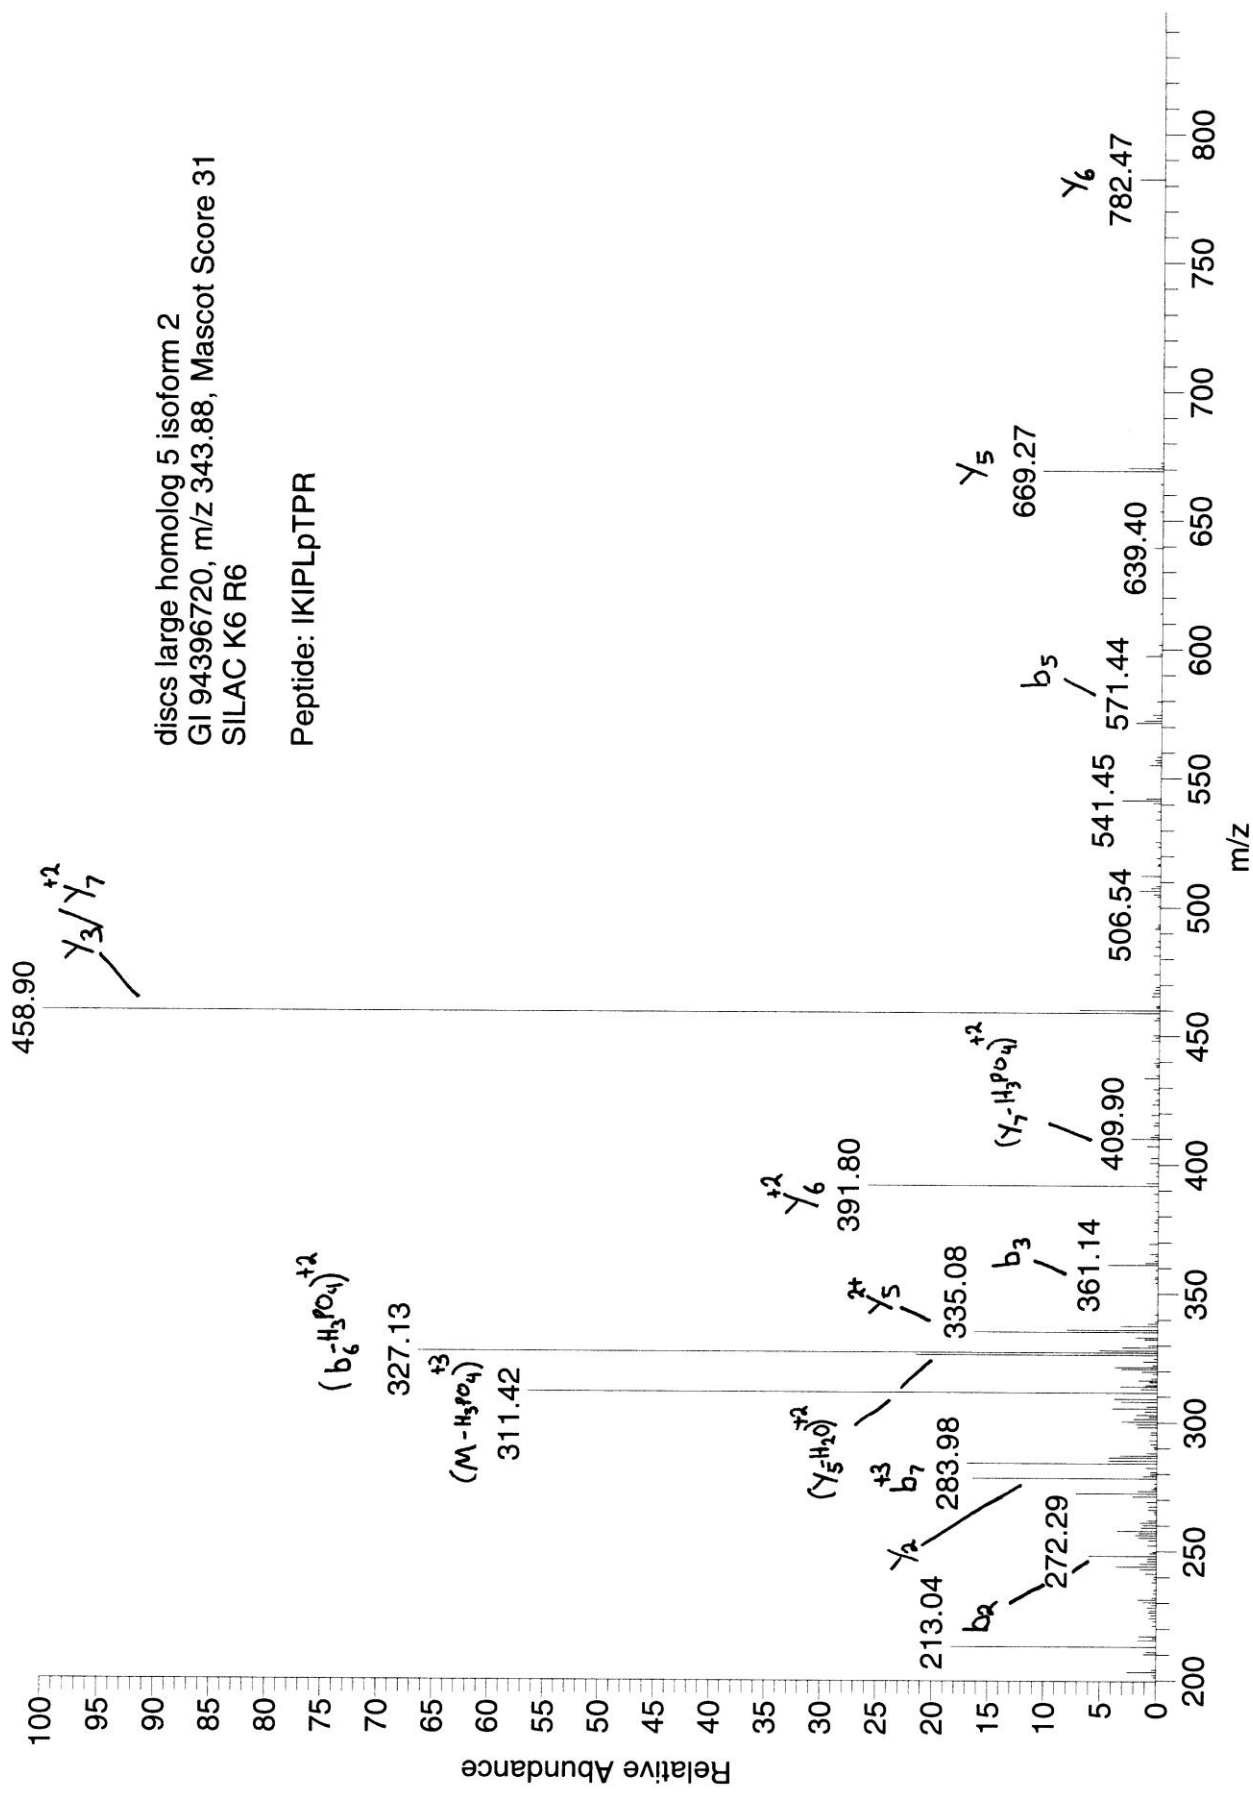

discs large homolog 5 isoform 2  
 GI 94396720, m/z 343.88, Mascot Score 31  
 SILAC K6 R6

Peptide: IKIPLpTPR



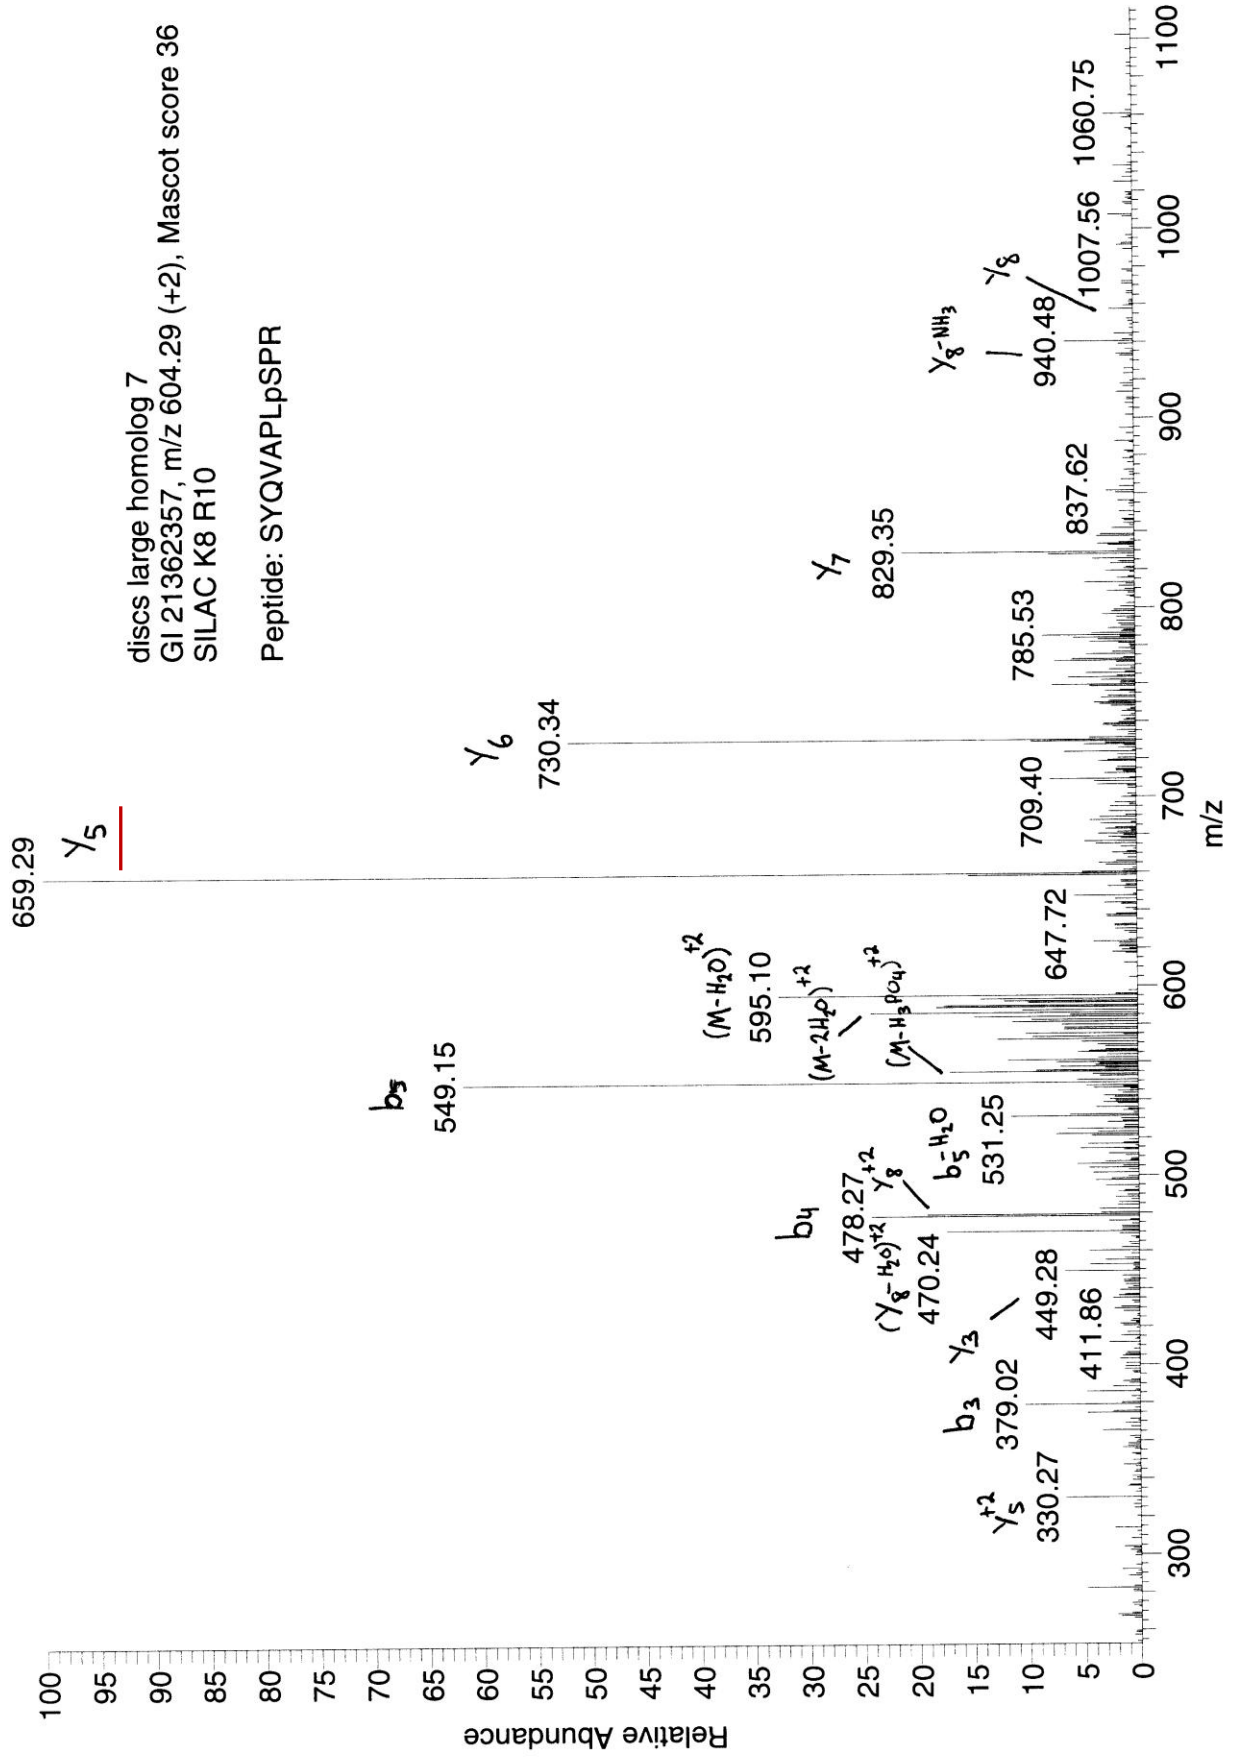

**Dnaj homolog subfamily C member 30**  
 GI 21644569, m/z 643.65 (+3), Mascot score 16  
 SILAC K8 R10  
 Peptide: TPVADPAPRRPPPYpTPR

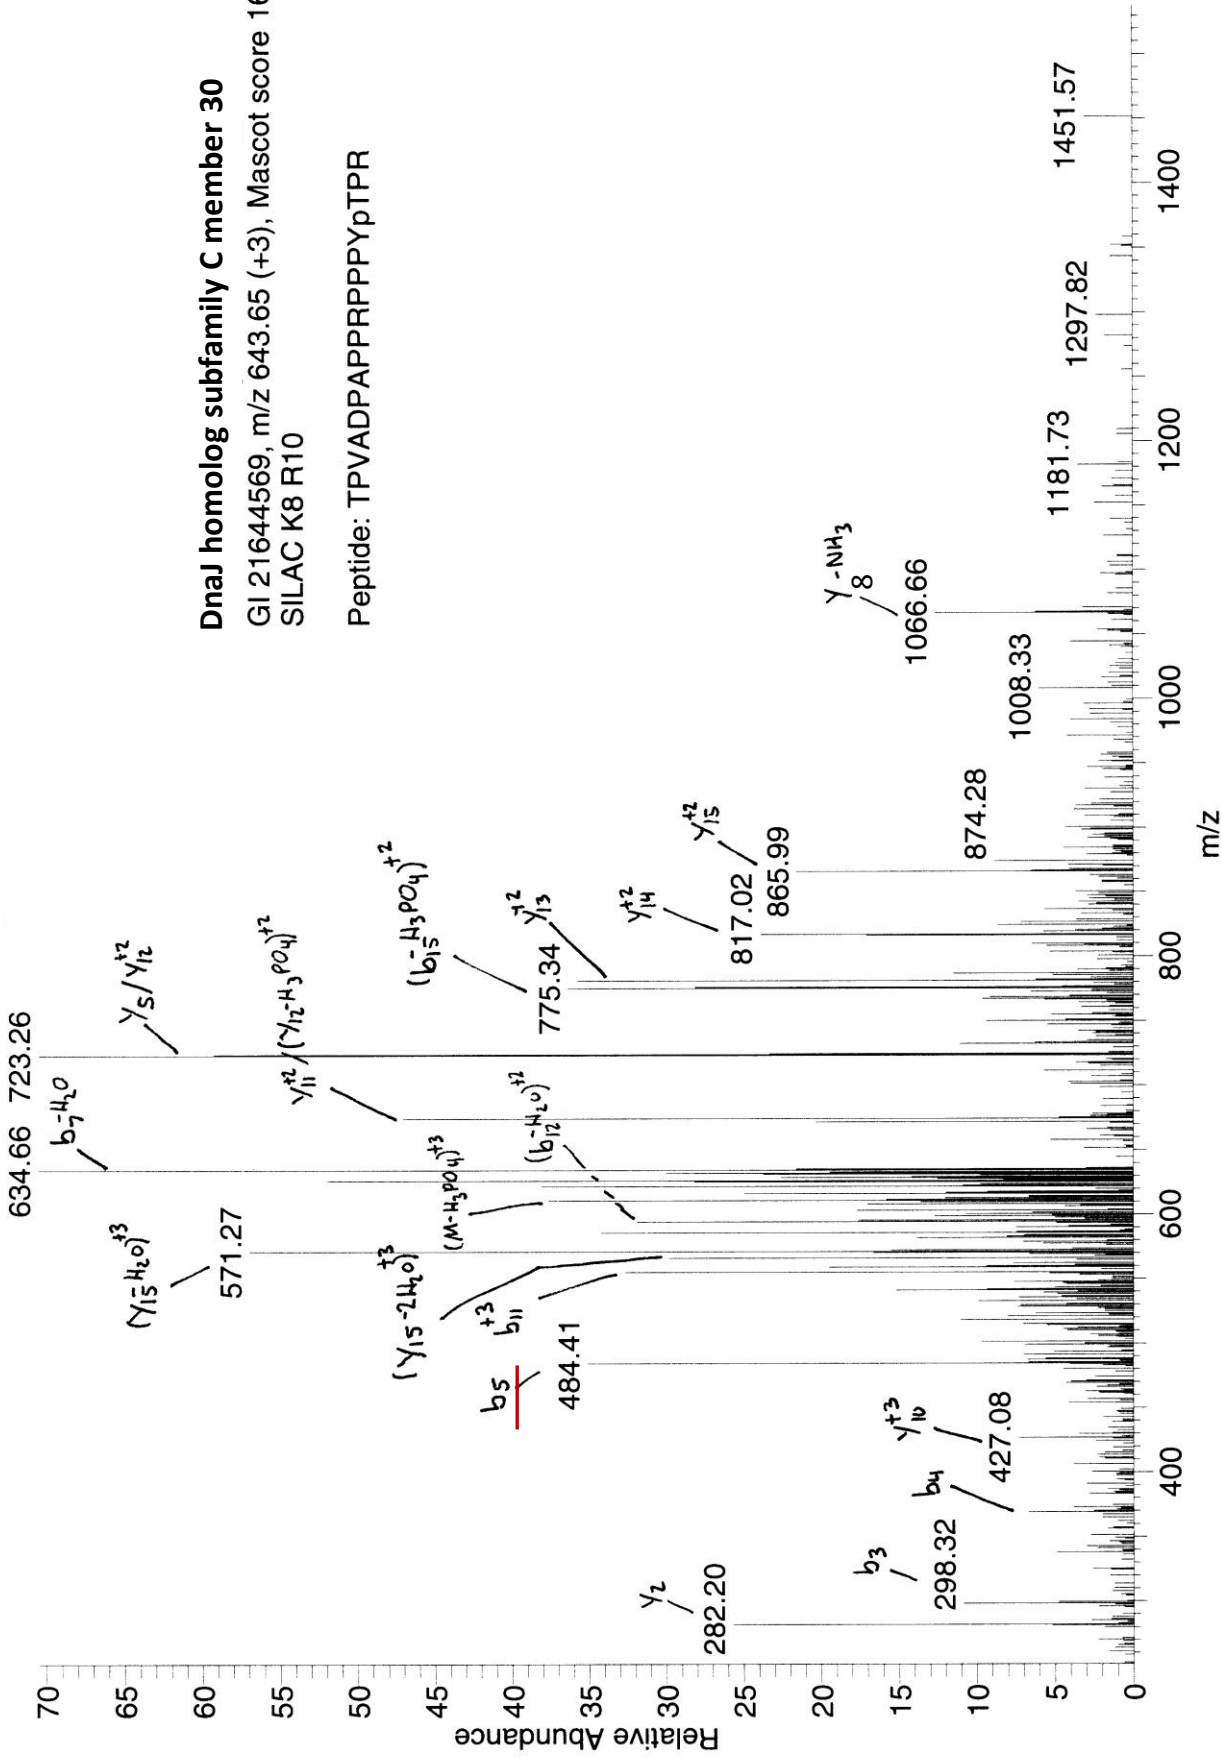

dynein cytoplasmic 1 intermediate chain 2  
 GI 6753658, m/z 967.79 (+3), Mascot score 51  
 SILAC K6 R6

Peptide: EAEALLQSMGLTTDSPVIPPMPSPSSK<sub>ox</sub>

Fragmentation does not distinguish phosphorylation at positions 23, 25 and 26. Assignment is based on position of proline.

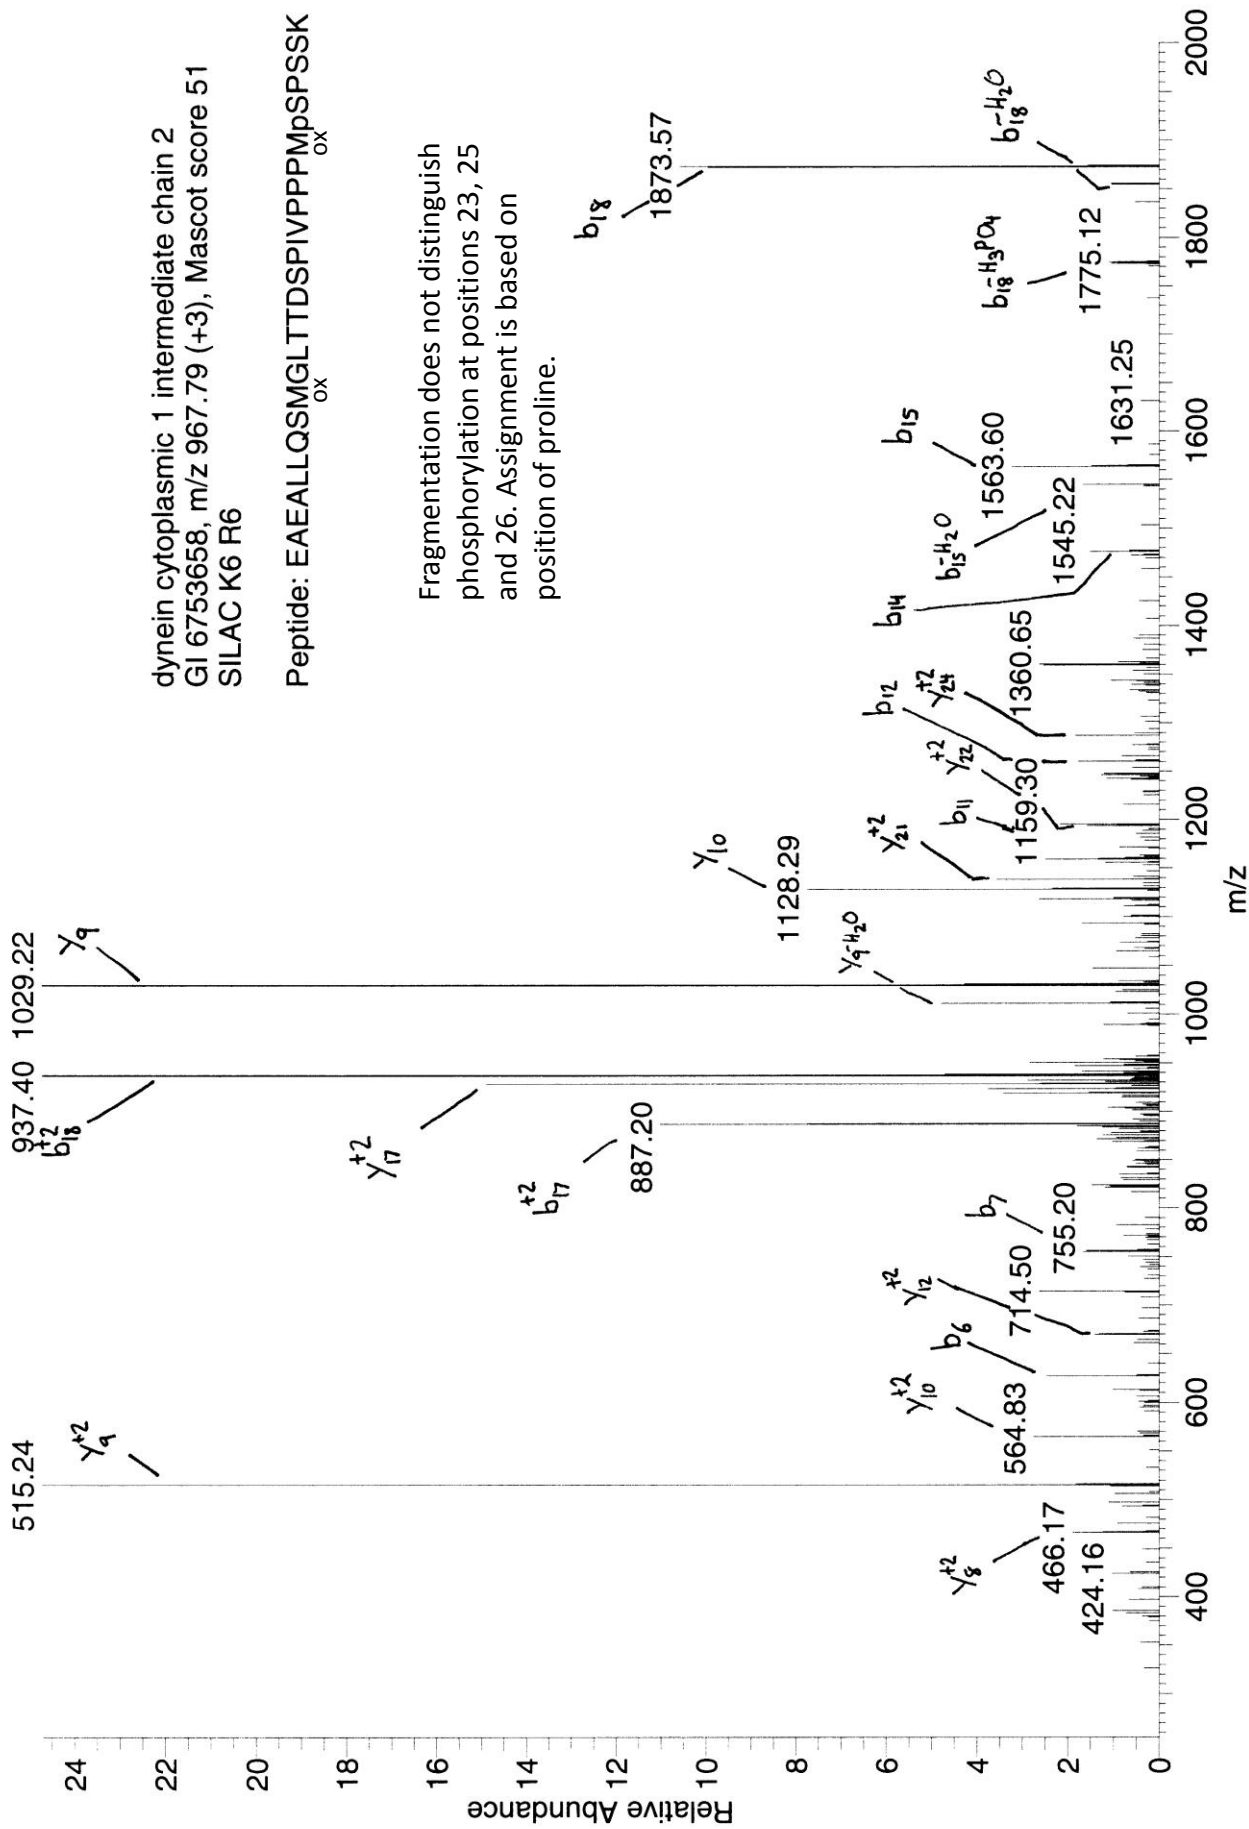

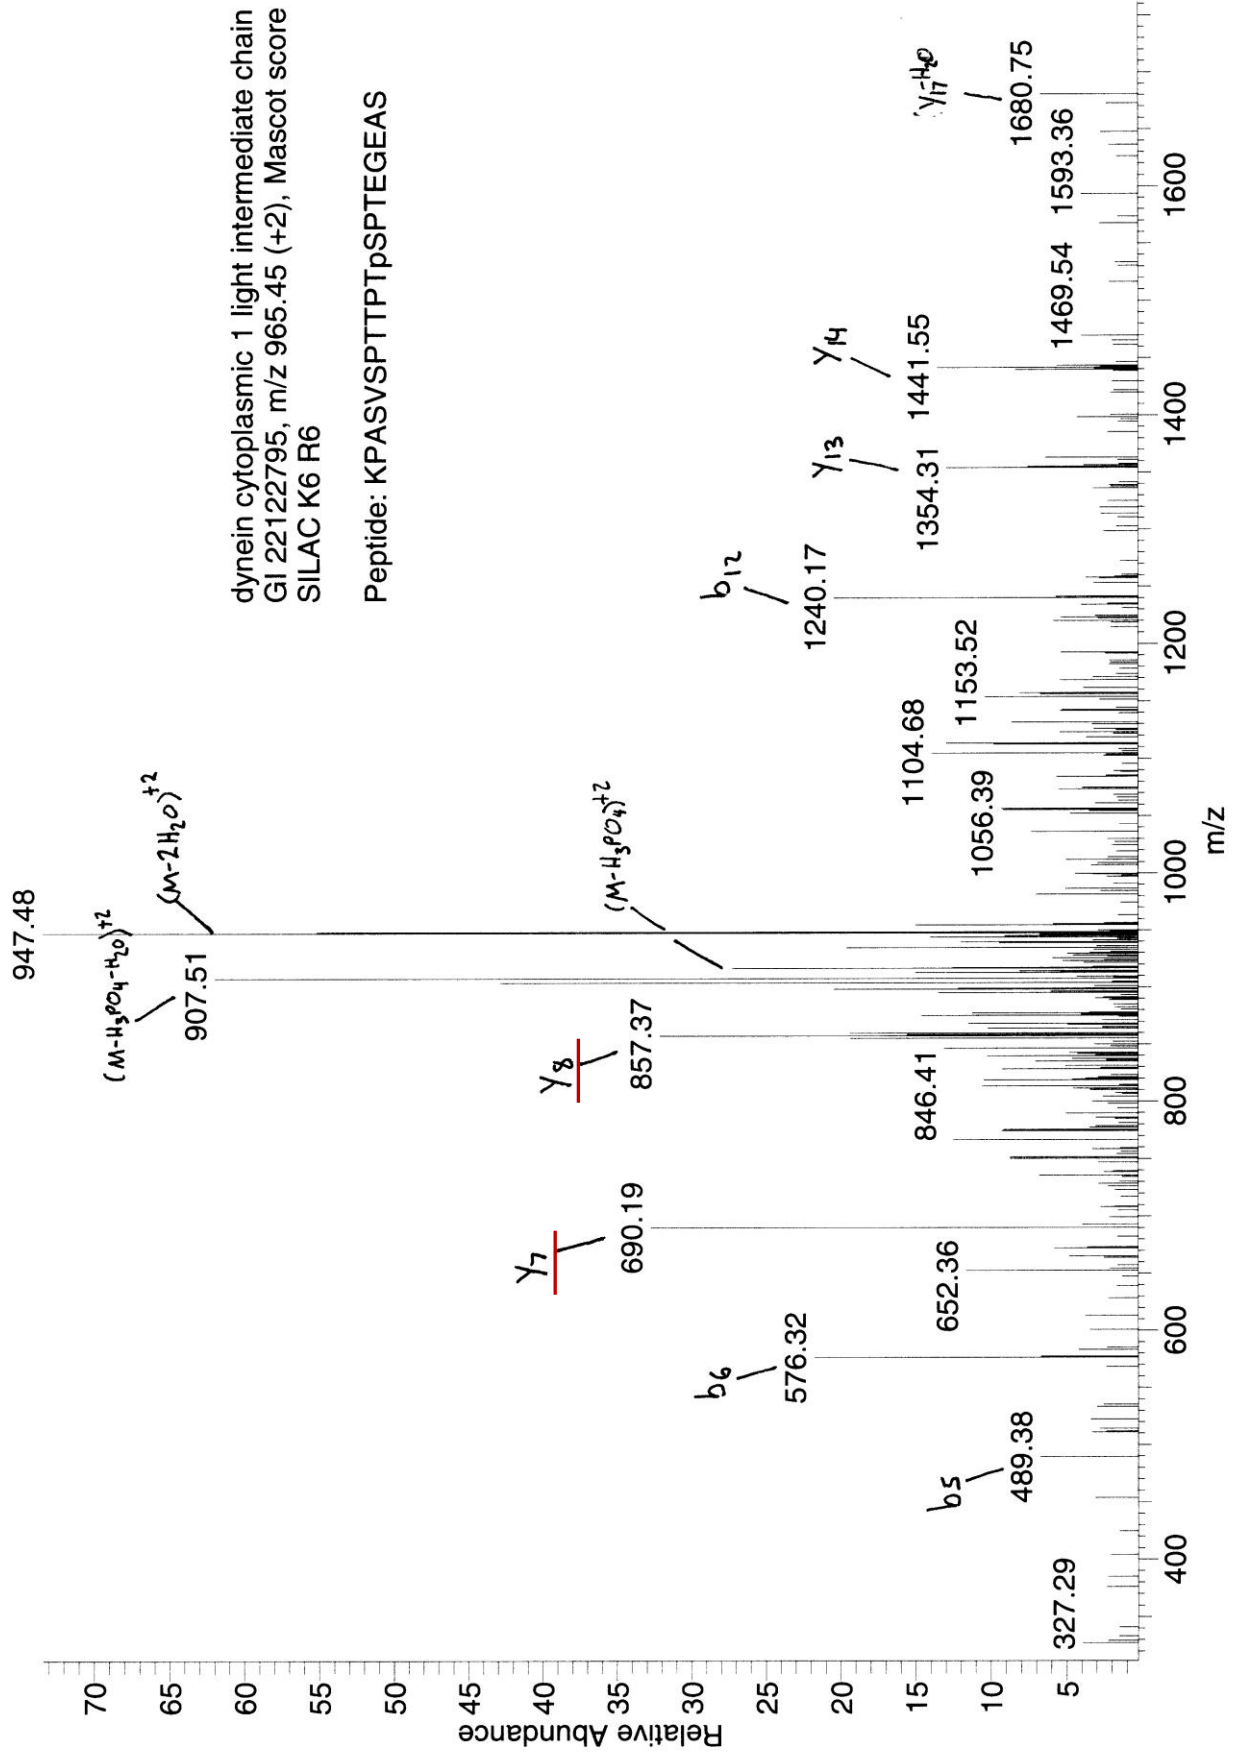

dynein cytoplasmic 1 light intermediate chain 1  
 GI 22122795, m/z 965.45 (+2), Mascot score 27  
 SILAC K6 R6

Peptide: KPASVSPTTTTPSPTEGEAS

epidermal growth factor receptor isoform 1  
 GI 46560582, m/z 716.68 (+3), Mascot score 34  
 SILAC K8 R10

Peptide: ELVEPLpTPSGEAPNQAHLR

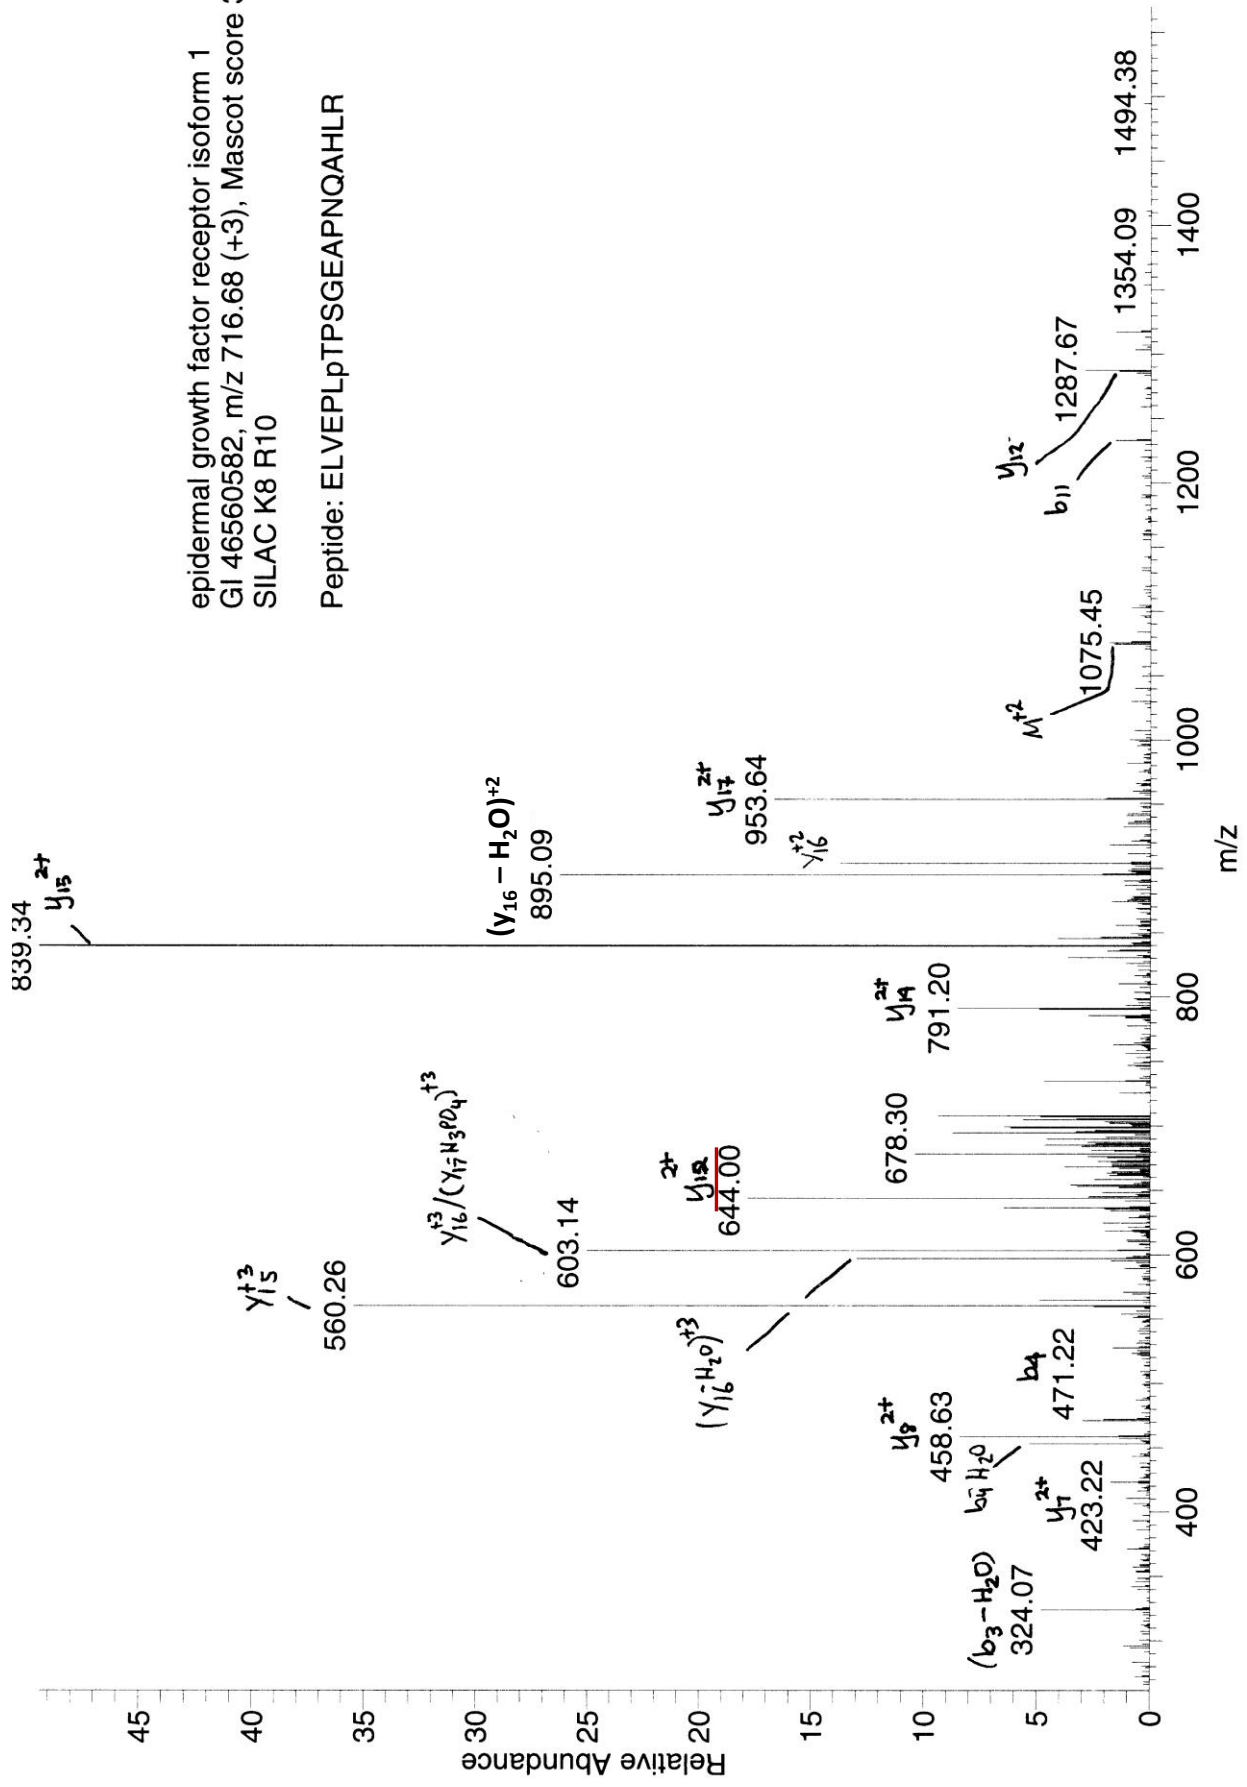

Ets2 repressor factor  
 GI 40254588, m/z 741.34 (+2), Mascot score 67  
 SILAC K6 R6

Peptide: GDVGPGESGGPLpTPR

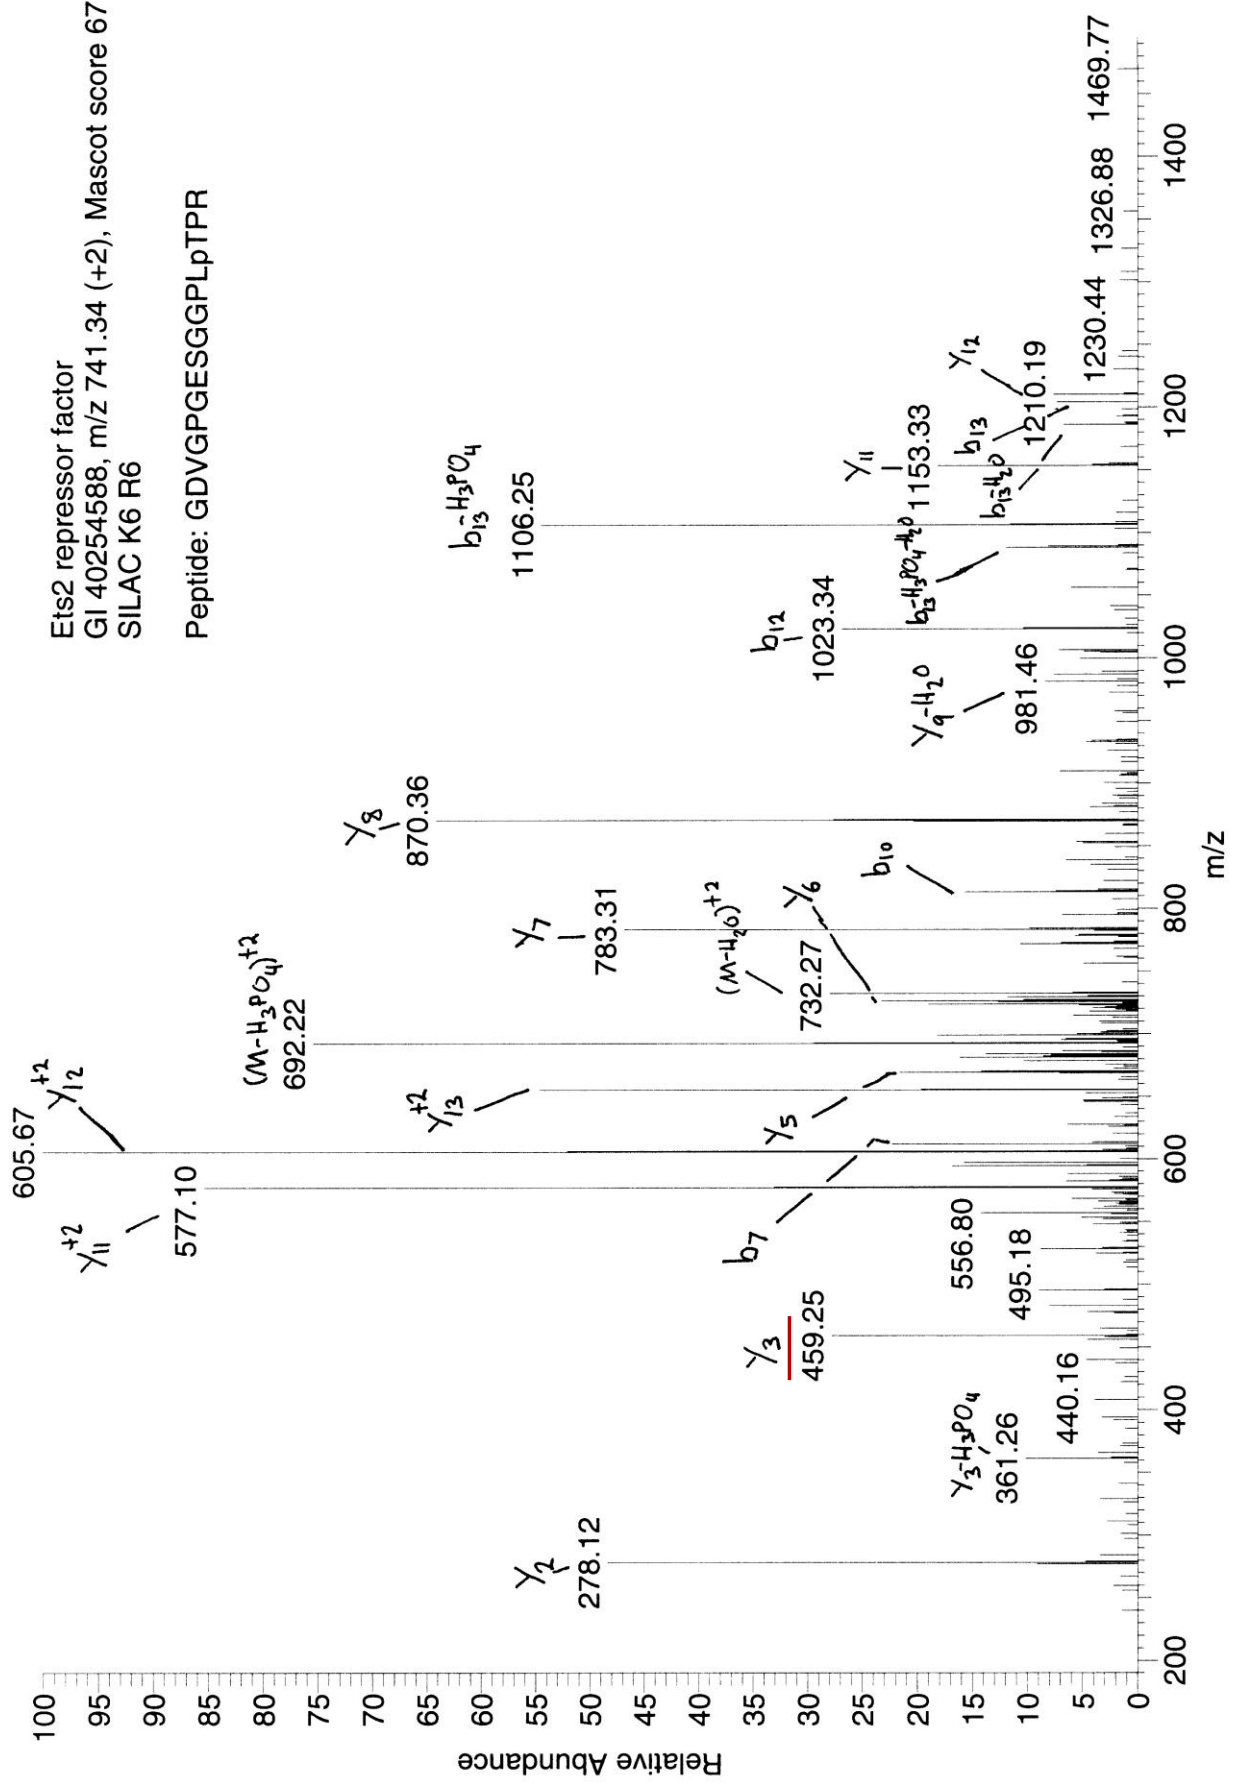



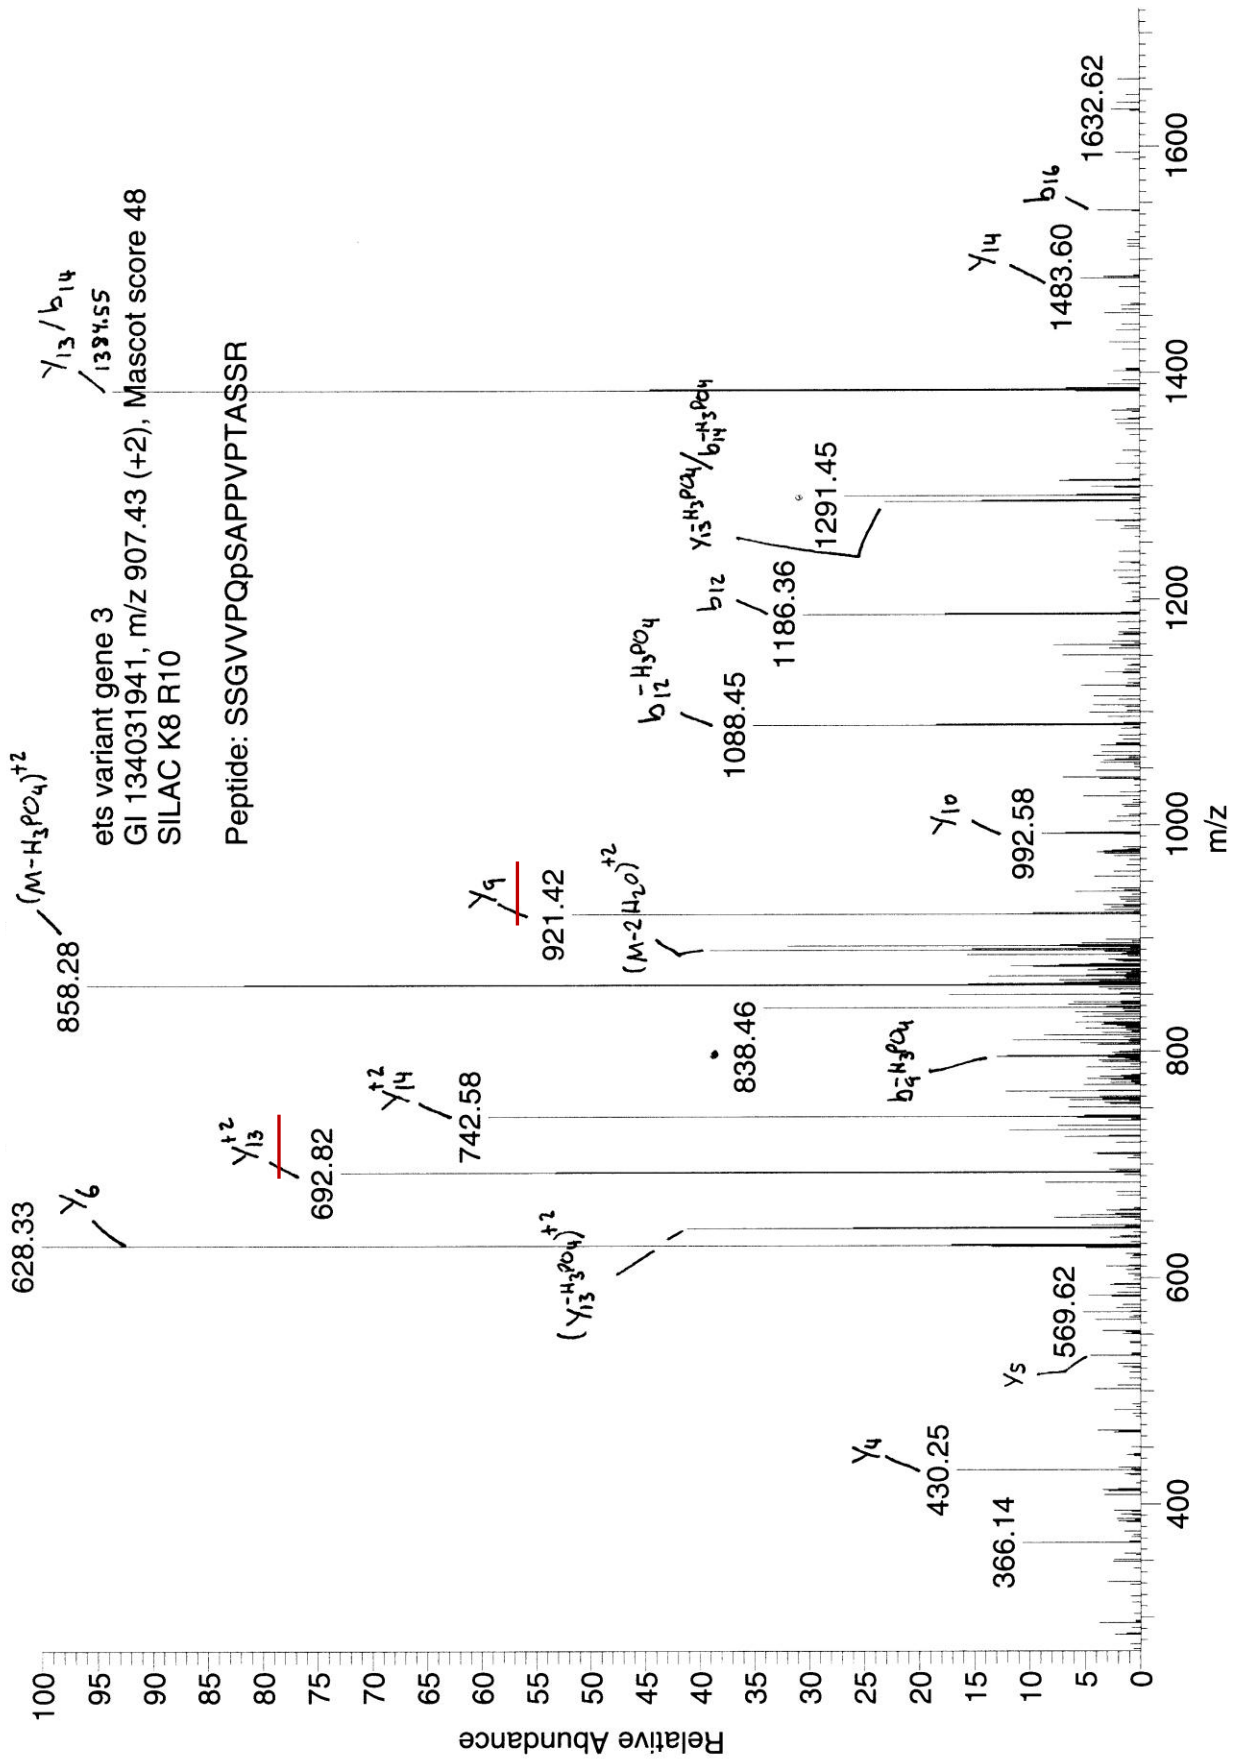

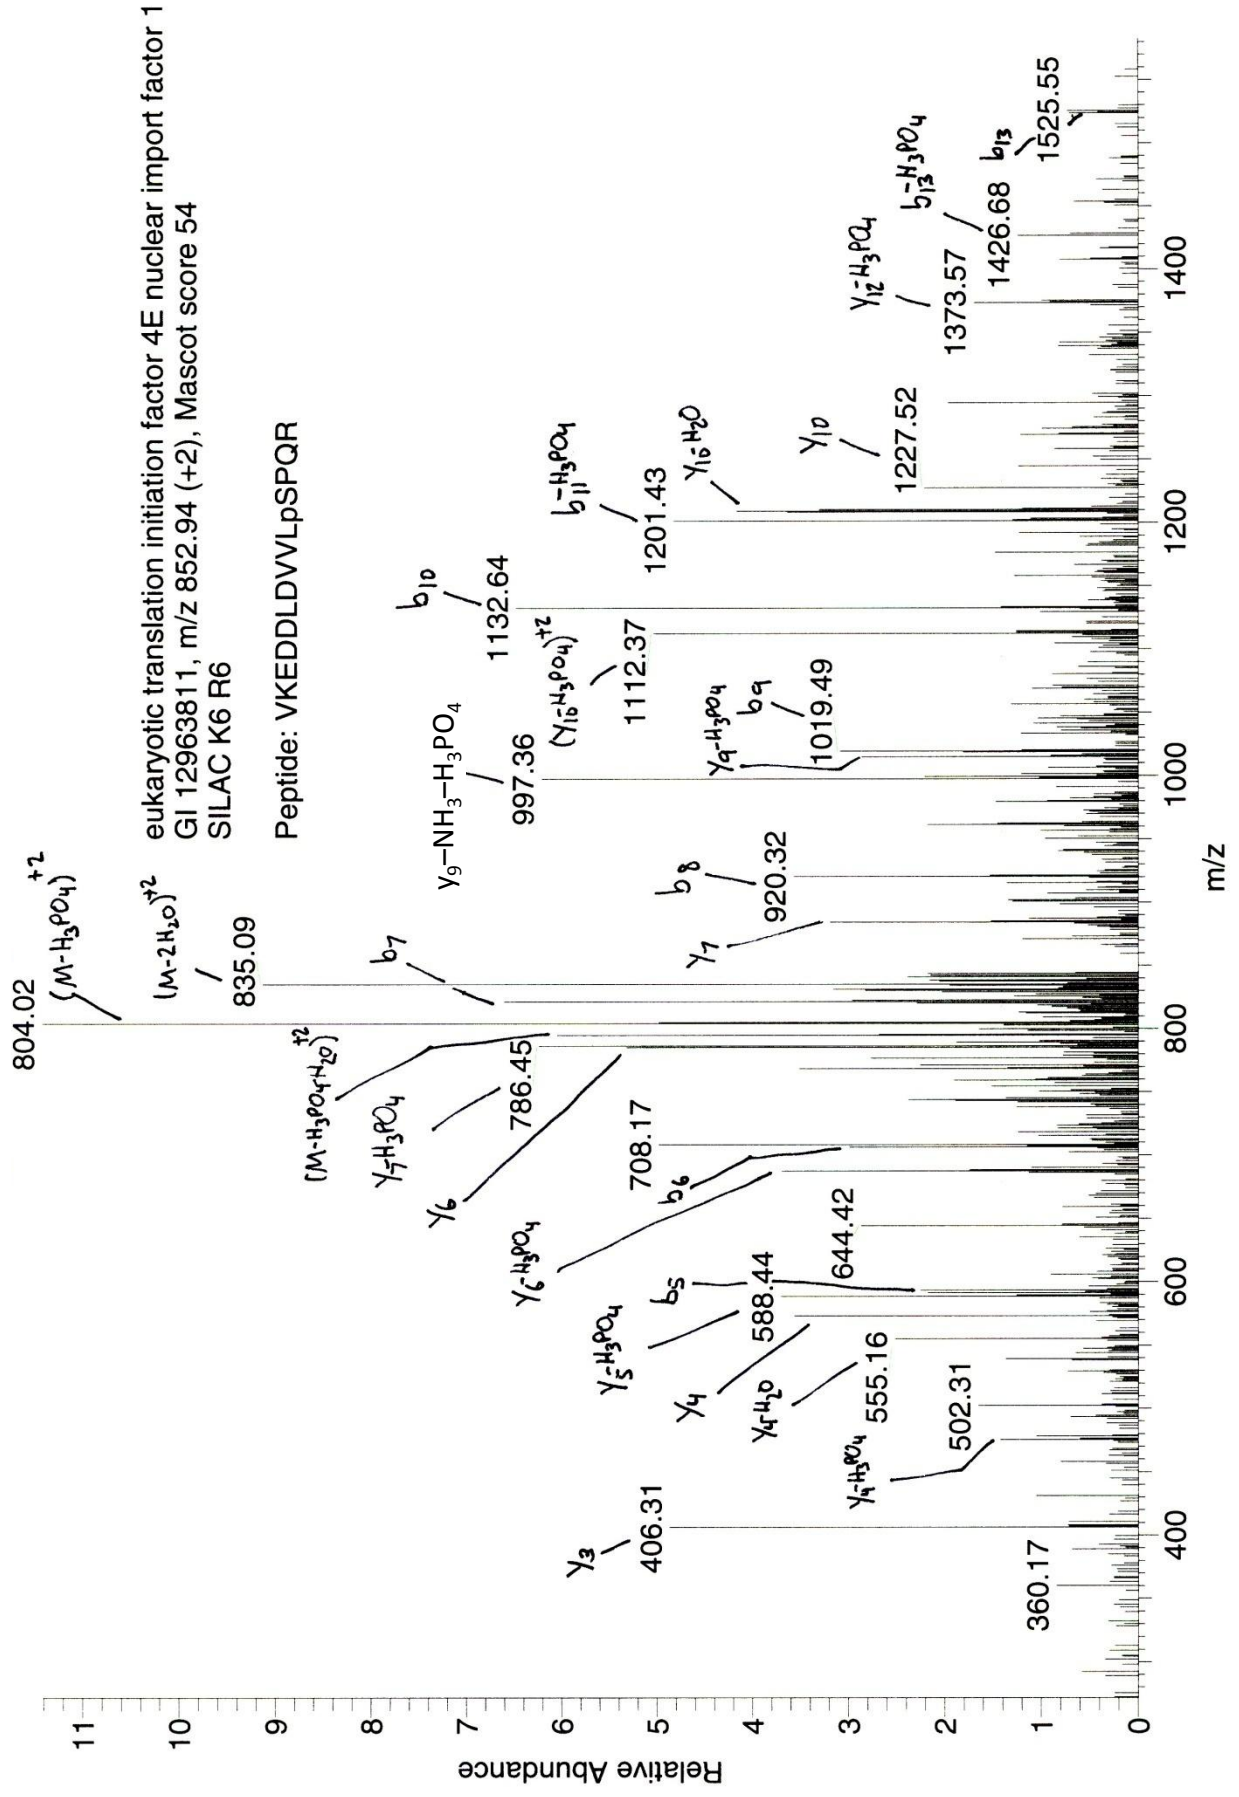

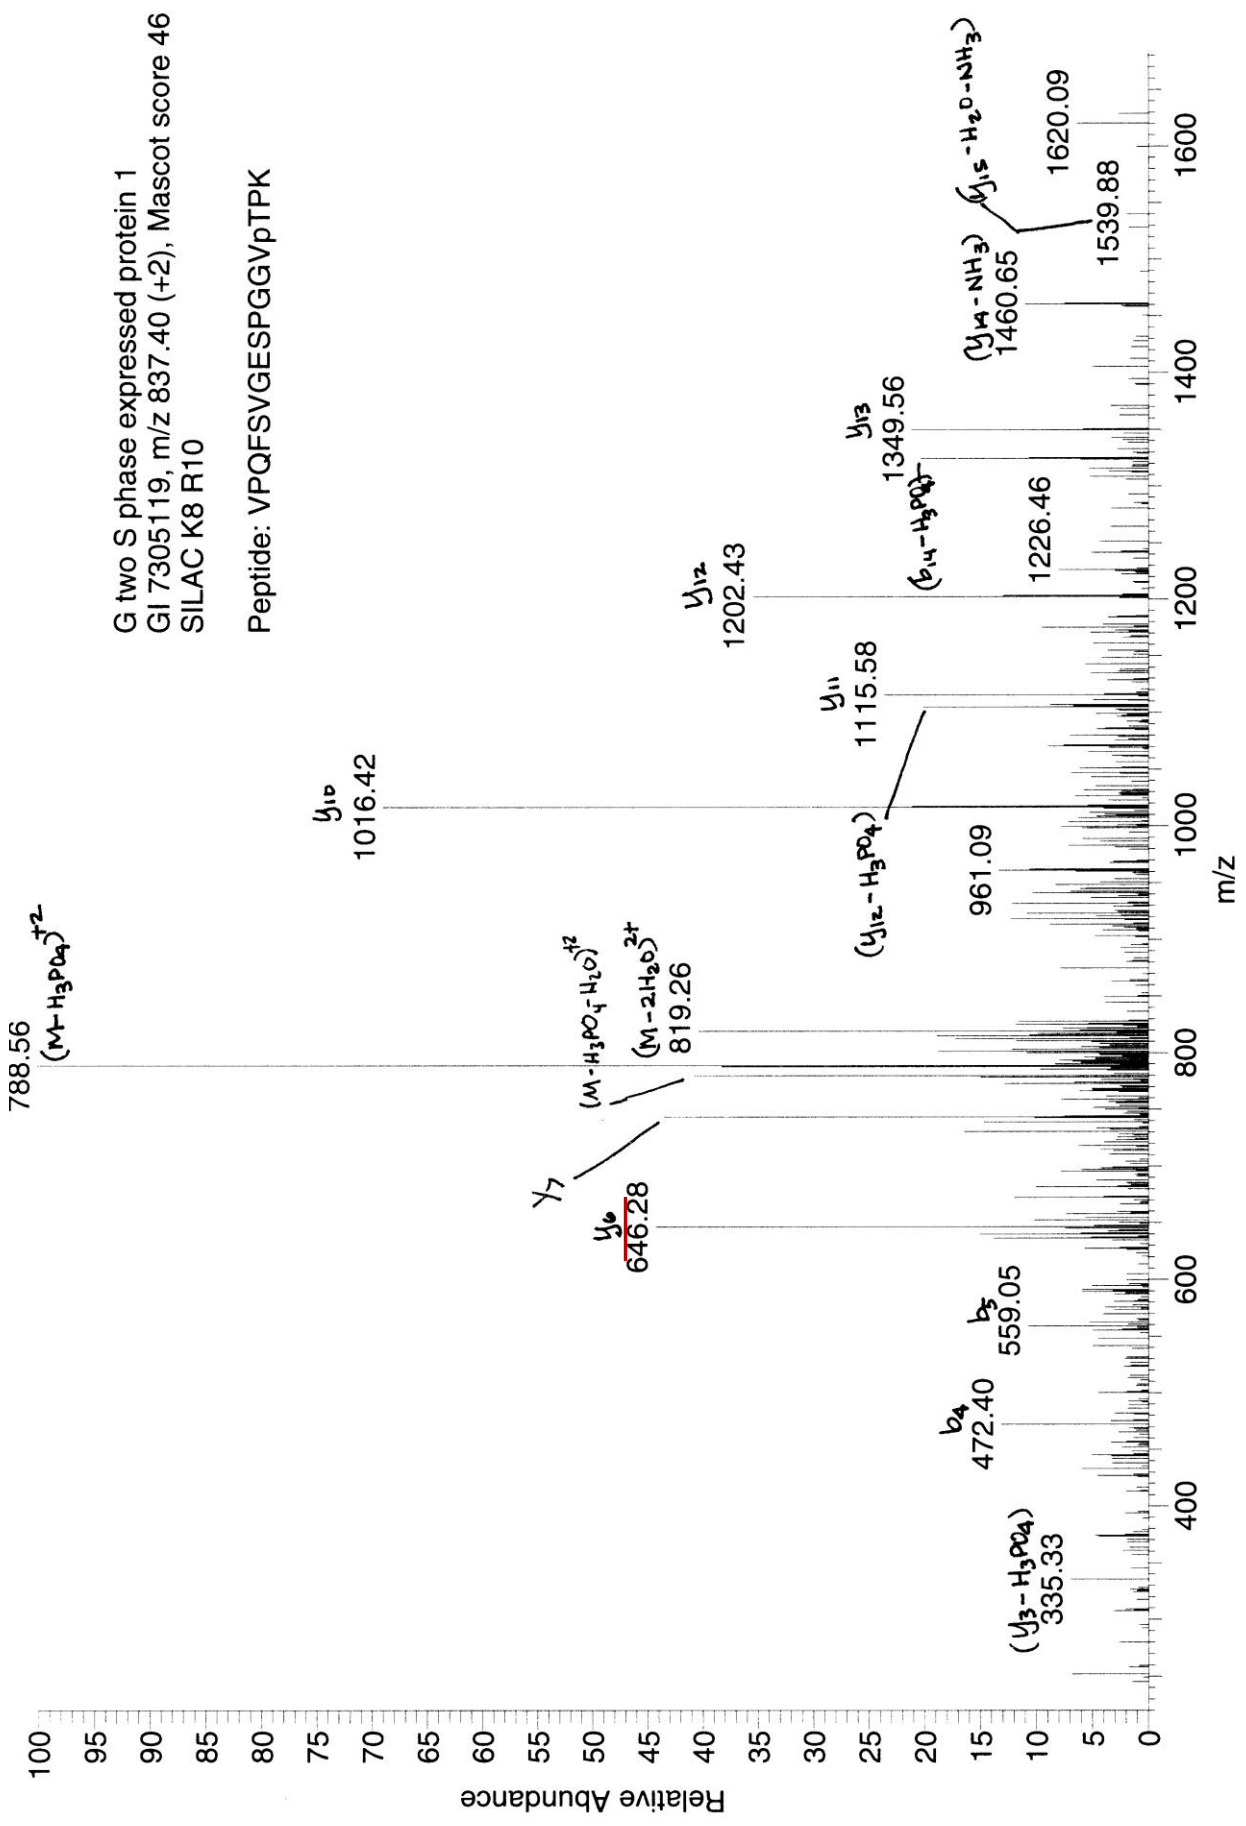

G two S phase expressed protein 1  
 GI 7305119, m/z 837.40 (+2), Mascot score 46  
 SILAC K8 R10

Peptide: VPQFVSGESGGVpTPK

gap junction membrane channel protein alpha 1  
 GI 6753992, m/z 823.37 (+2), Mascot score 20  
 SILAC K8 R10

Peptide: SDPYHATTGPLpSPSK

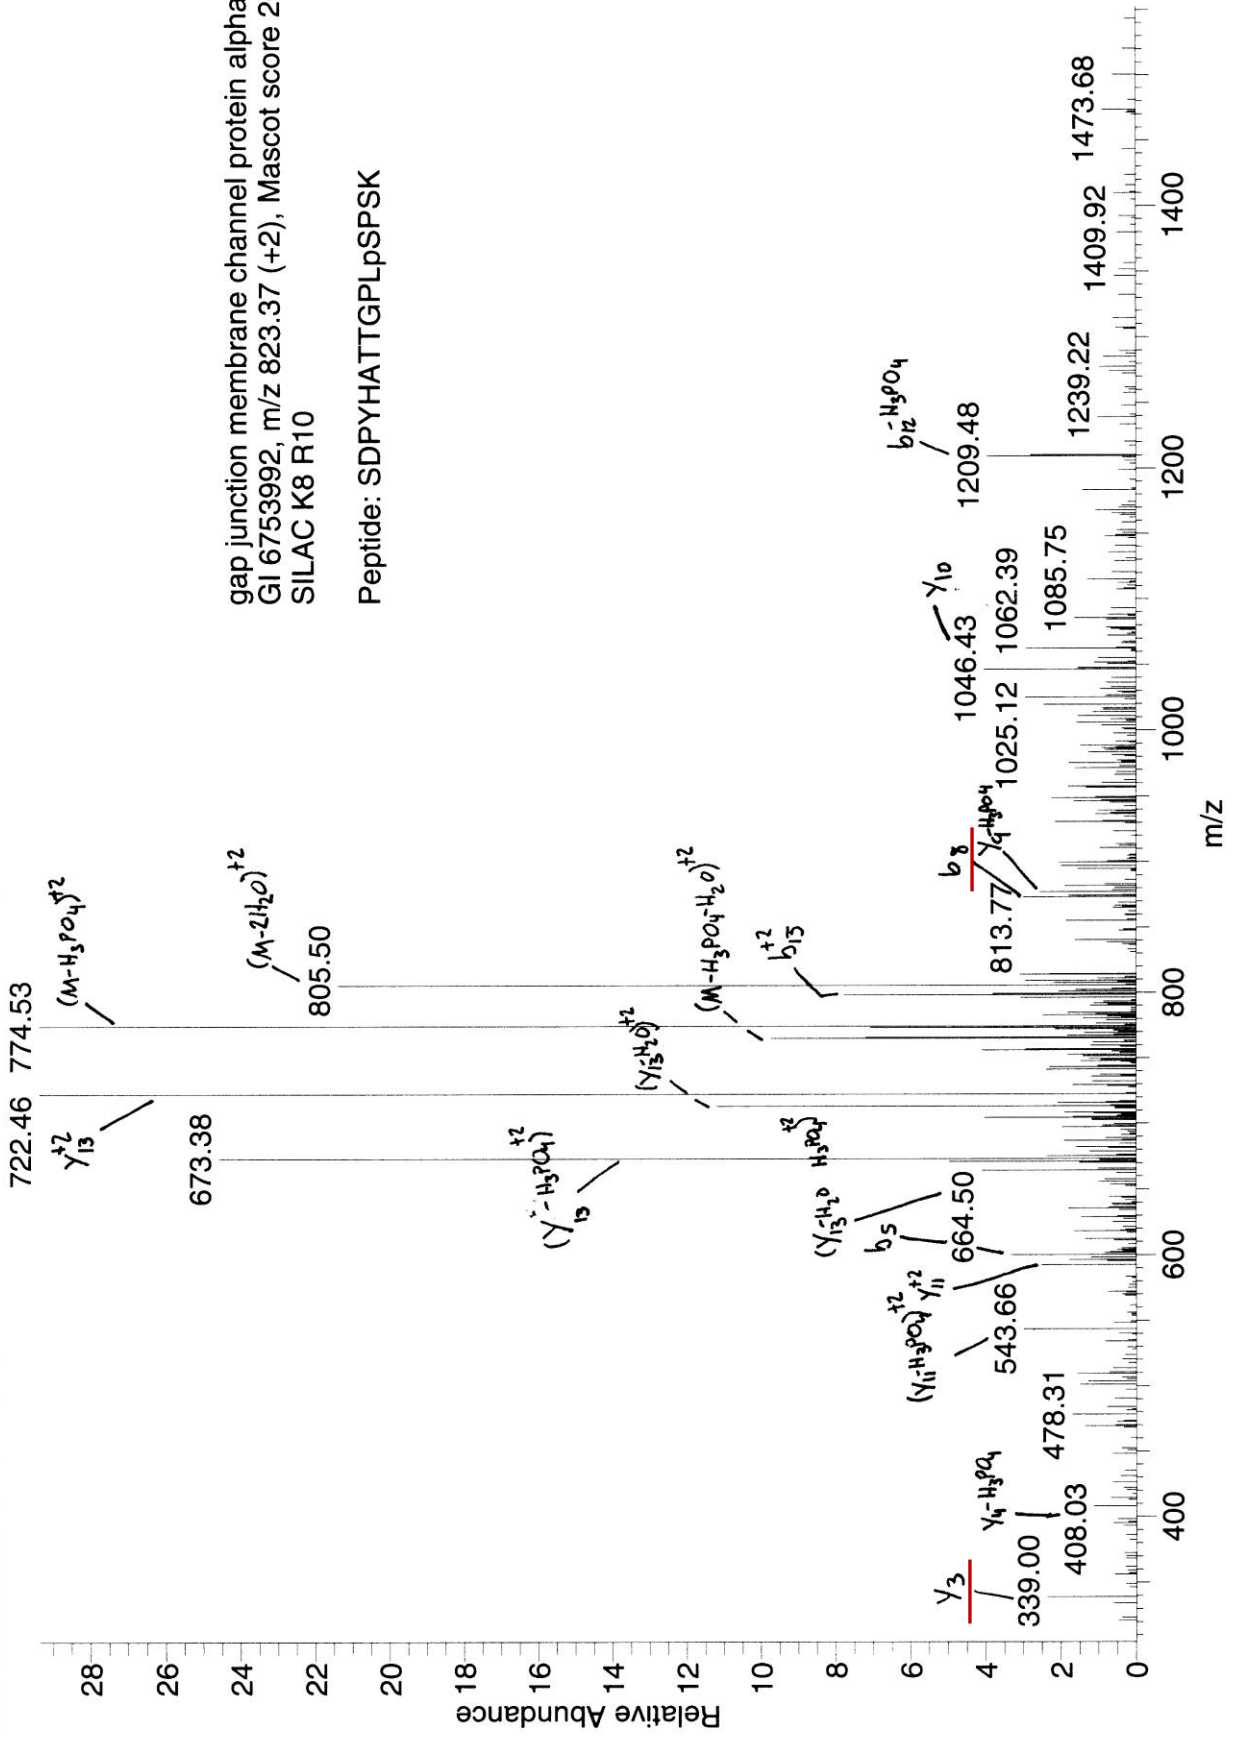

GLI-Kruppel family member GLI2  
 GI 124487481, m/z 920.94 (+2), Mascot score 56  
 SILAC K8 R10

Peptide: YAAATGGPPPPpTPLPGLDR

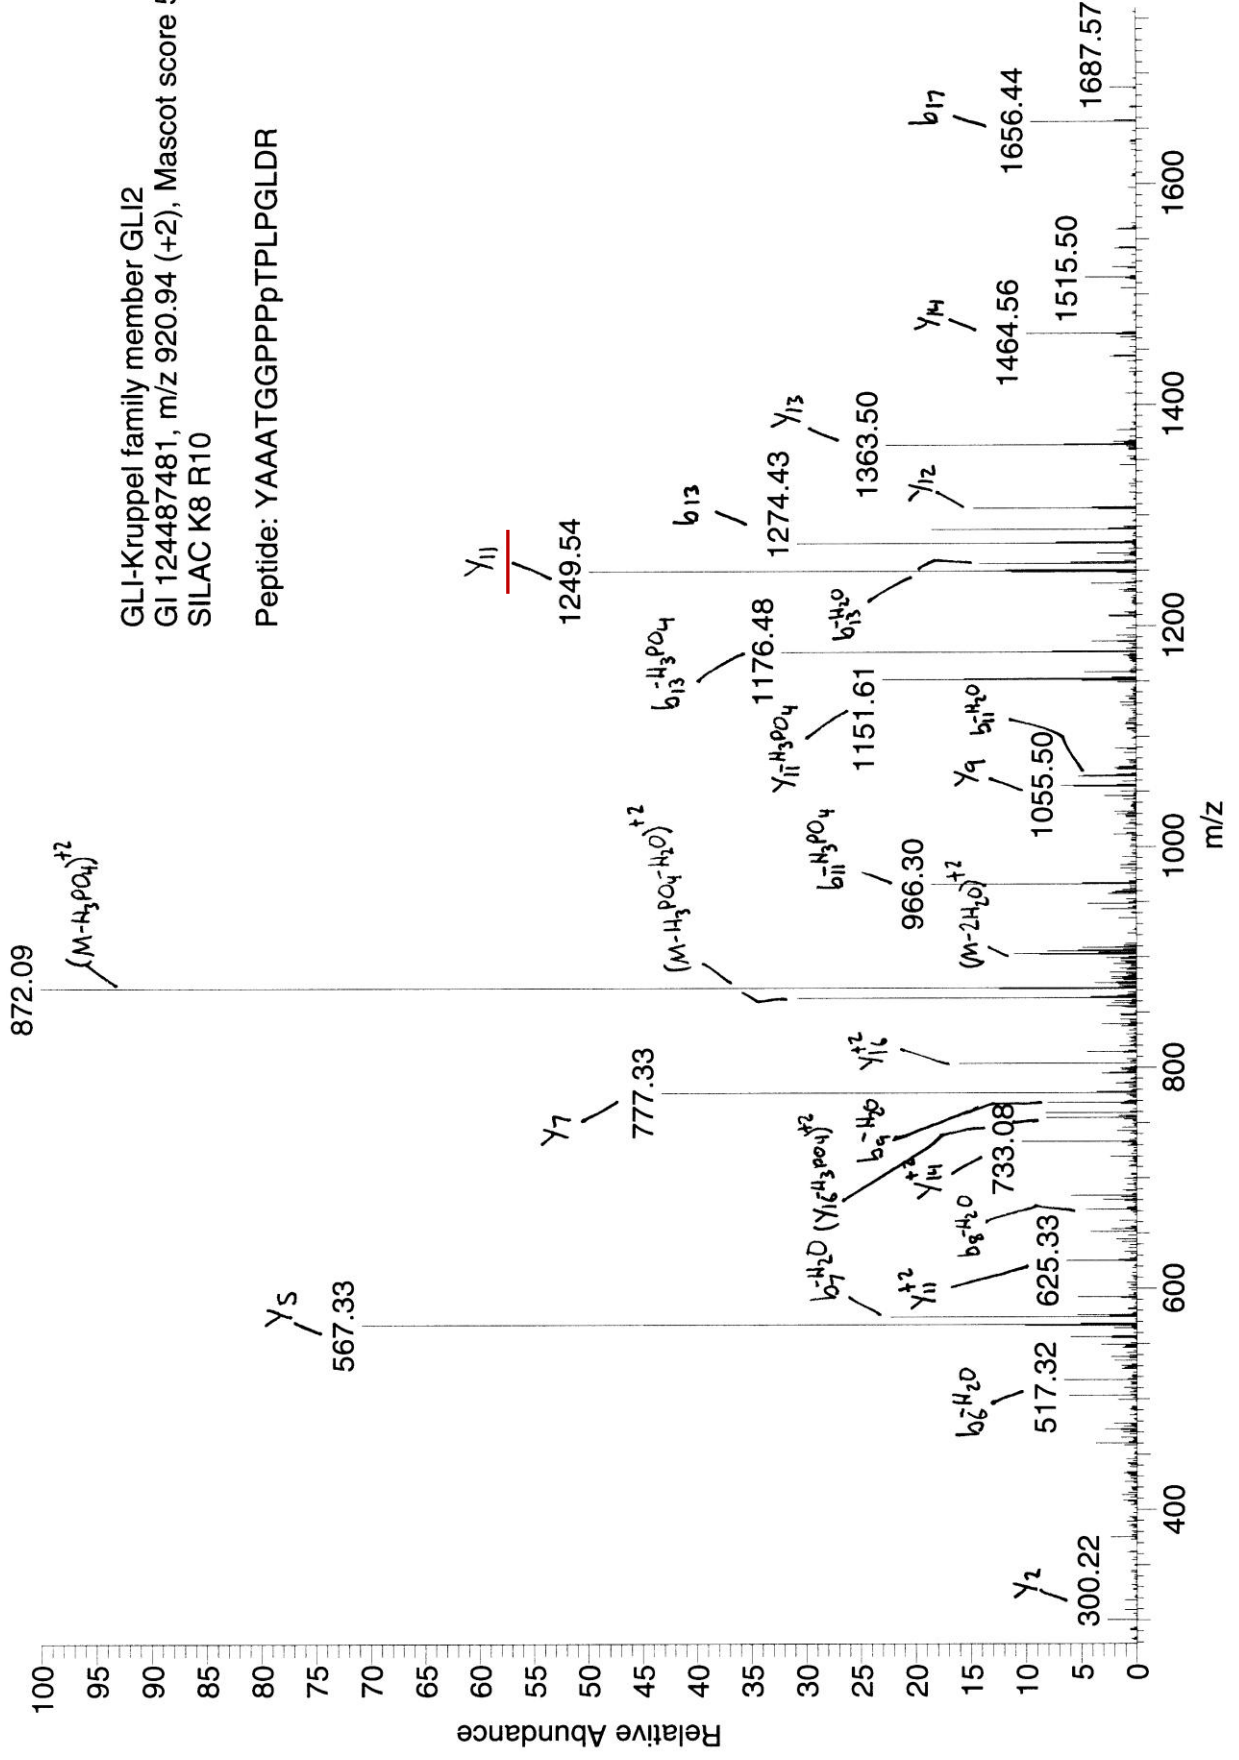

**GRB10 interacting protein GYF protein 2 isoform a**  
**GI 159032014** m/z 933.49 (+2), Mascot score 76  
 SILAC K6 R6

Peptide: ALSSGGSTITSPPLpSPALPK

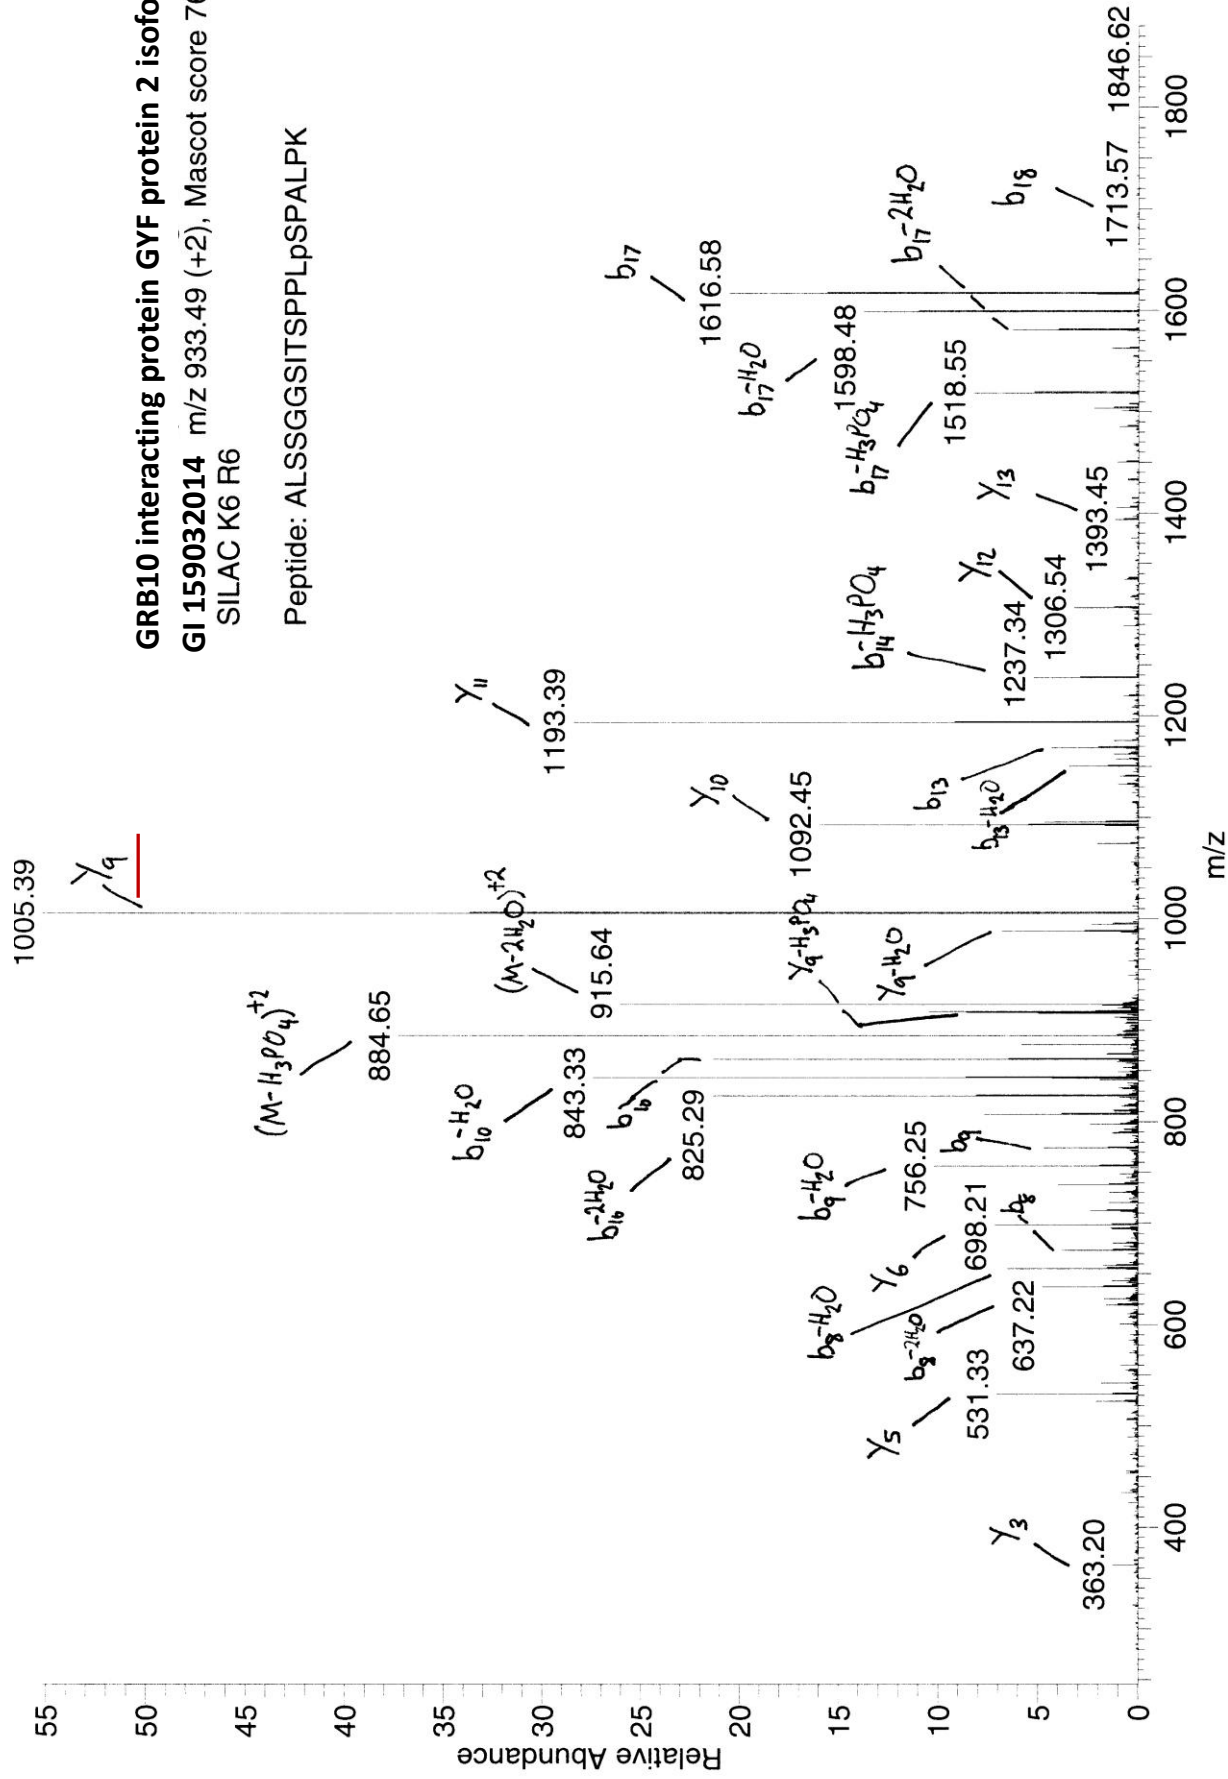



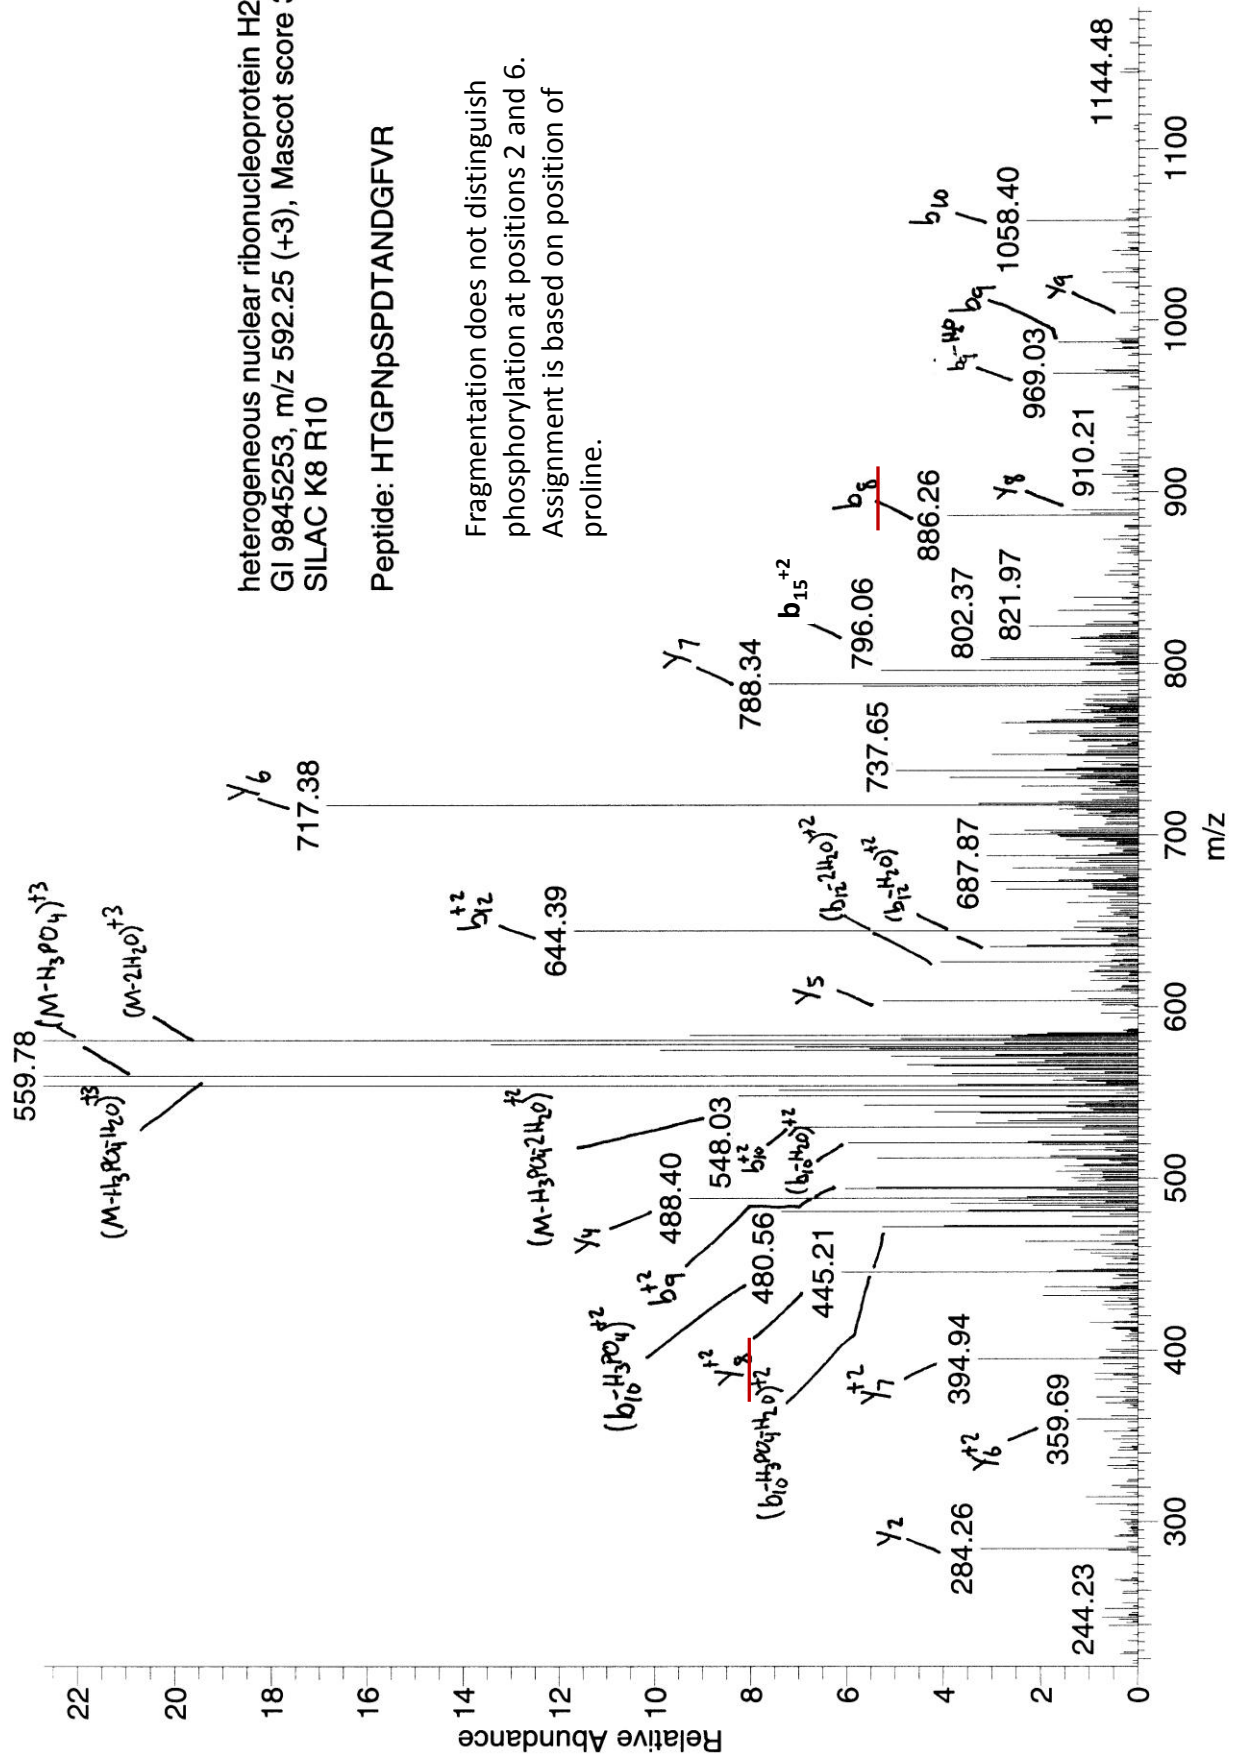

heterogeneous nuclear ribonucleoprotein H2  
 GI 9845253, m/z 592.25 (+3), Mascot score 33  
 SILAC K8 R10

Peptide: HTGPNpSPDTANDGFVR

Fragmentation does not distinguish phosphorylation at positions 2 and 6. Assignment is based on position of proline.



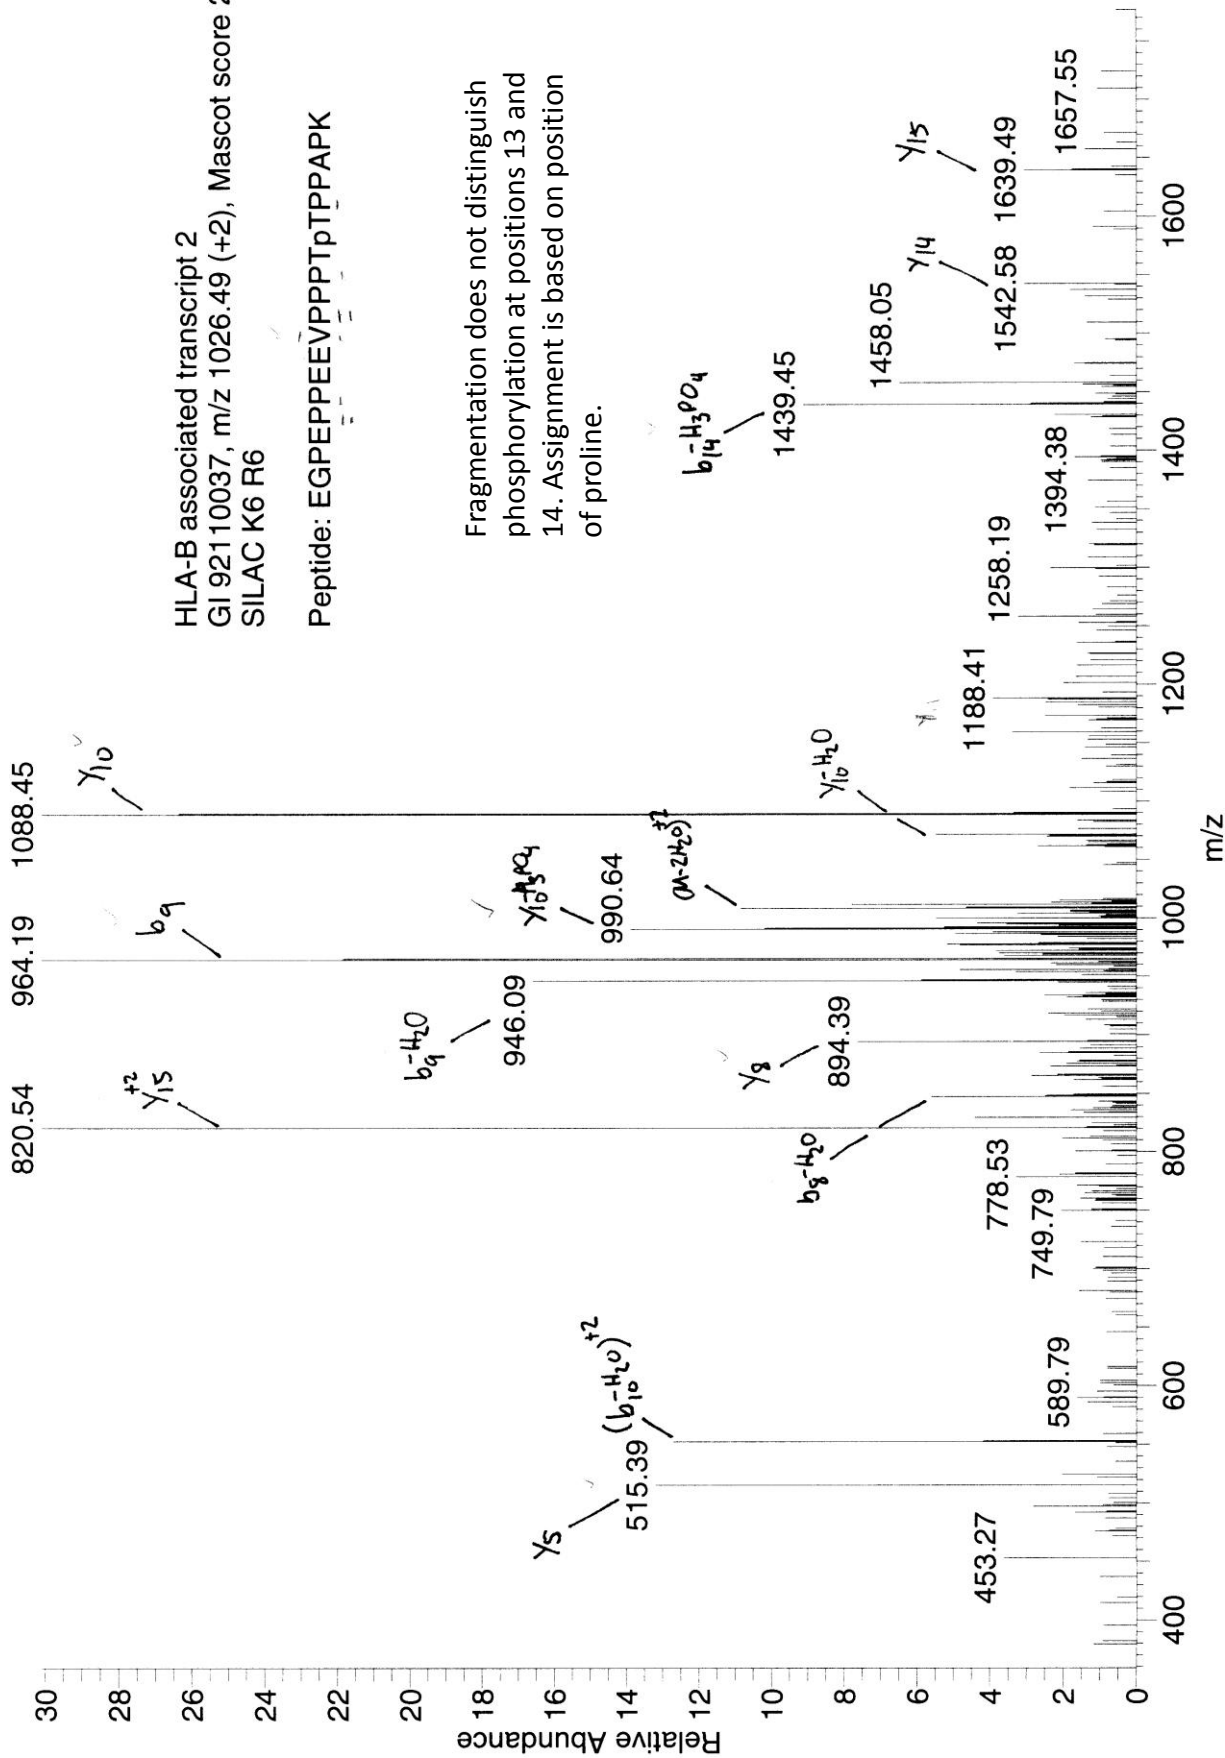

HLA-B associated transcript 2  
 GI 92110037, m/z 1026.49 (+2), Mascot score 20  
 SILAC K6 R6

Peptide: EGPEPEEVPPTTPAPK

Fragmentation does not distinguish phosphorylation at positions 13 and 14. Assignment is based on position of proline.

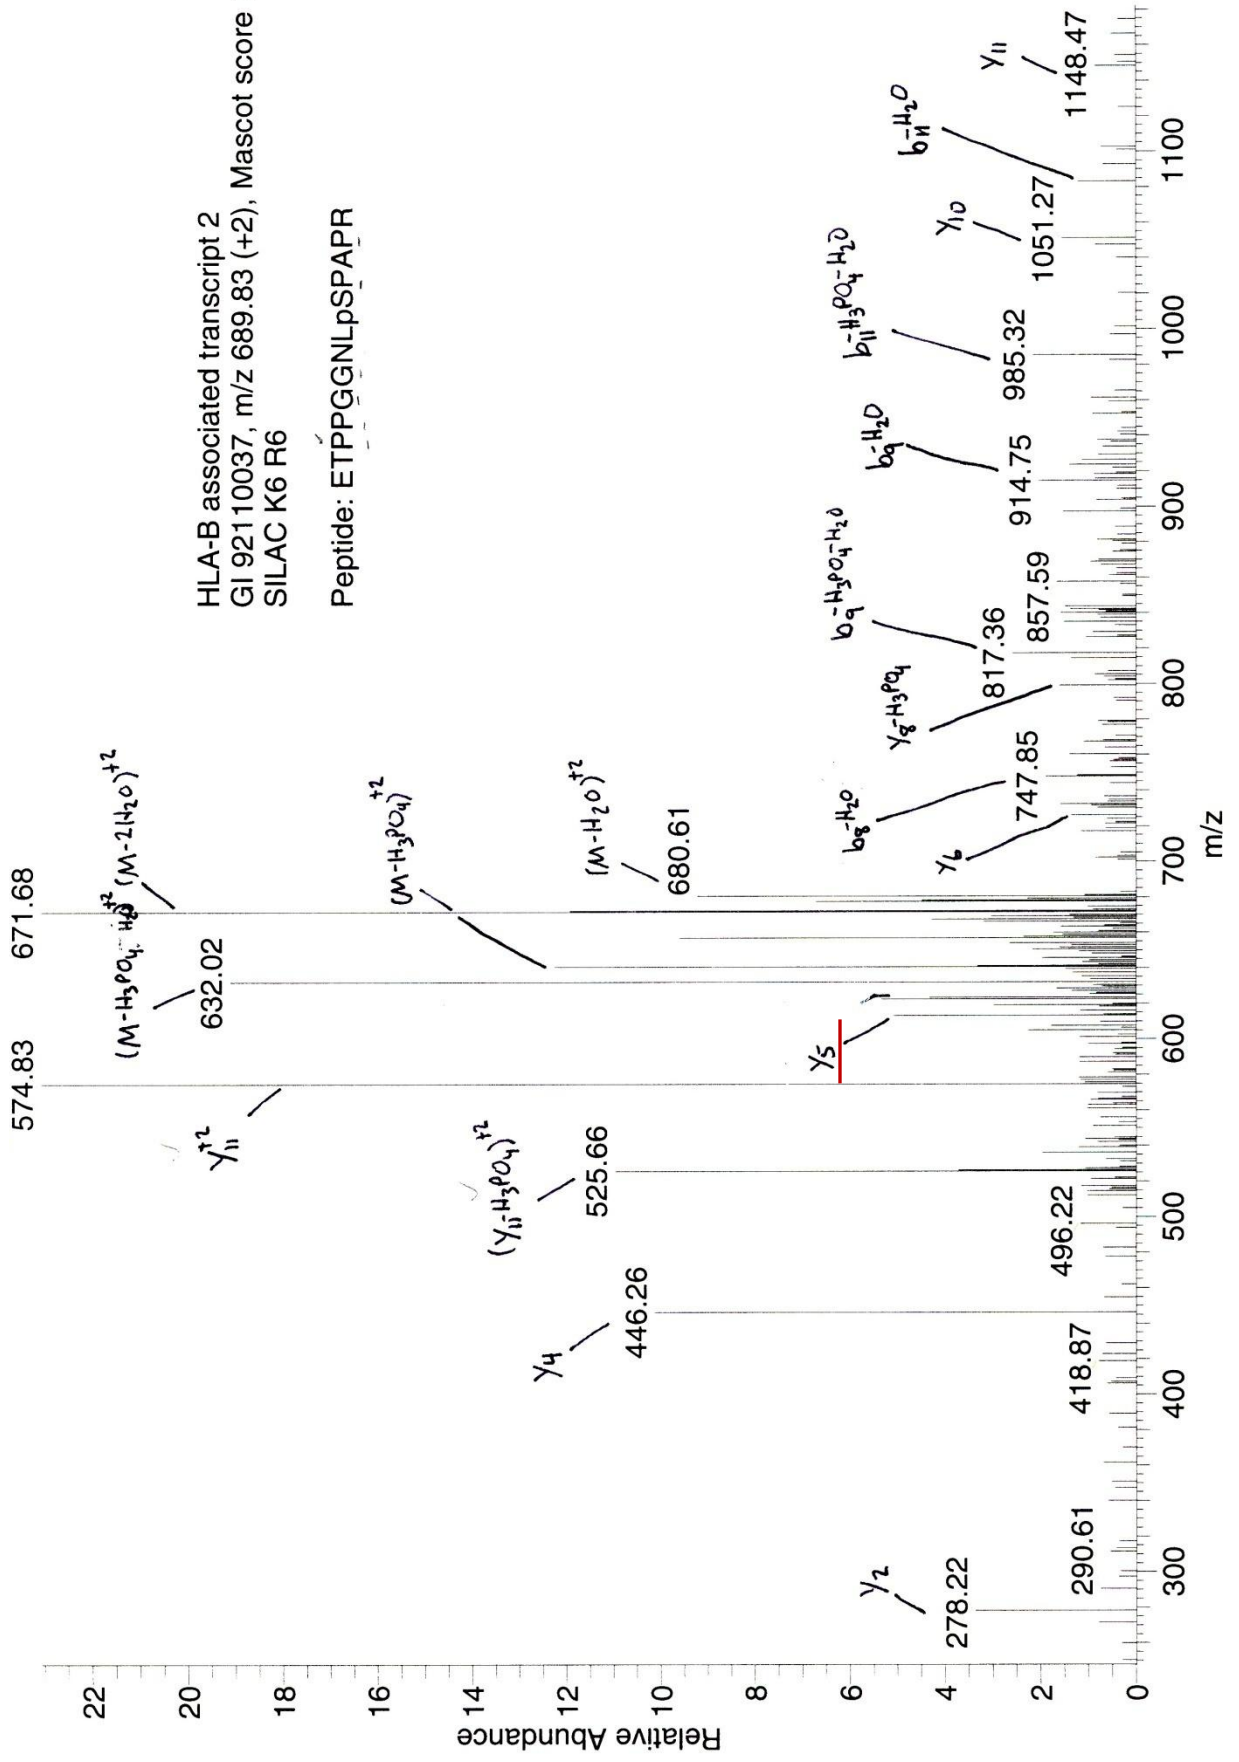

HLA-B associated transcript 2  
 GI 92110037, m/z 689.83 (+2), Mascot score 19  
 SILAC K6 R6

Peptide: ETPPGGNLpSPAPR

HLA-B associated transcript 2  
 GI 92110037, m/z 632.30 (+2), Mascot score 23  
 SILAC K8 R10

Peptide: LISGPLSPM[ox]SR

- not in synthetic spectrum
- Contaminant ion, identified in MS1, does not affect SILAC quantitation.

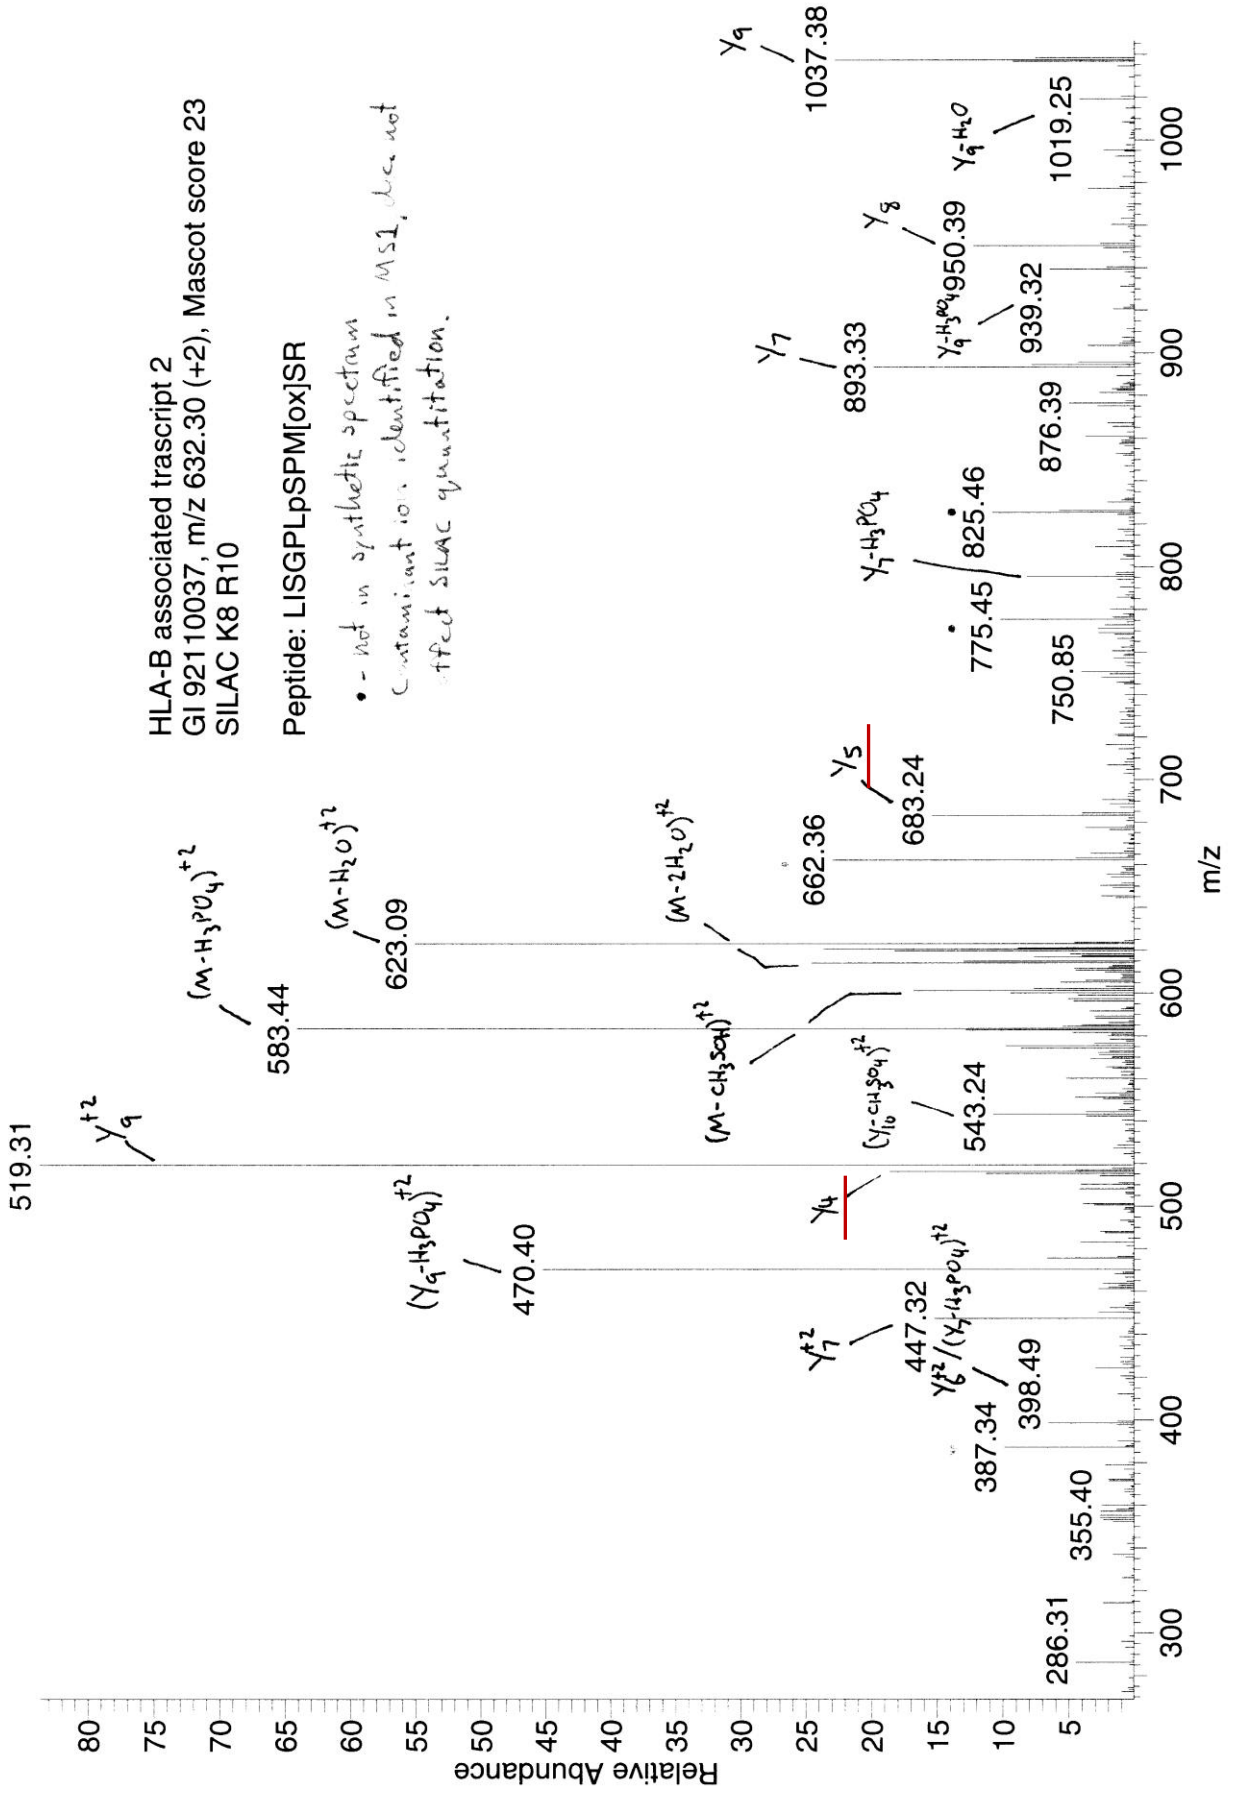

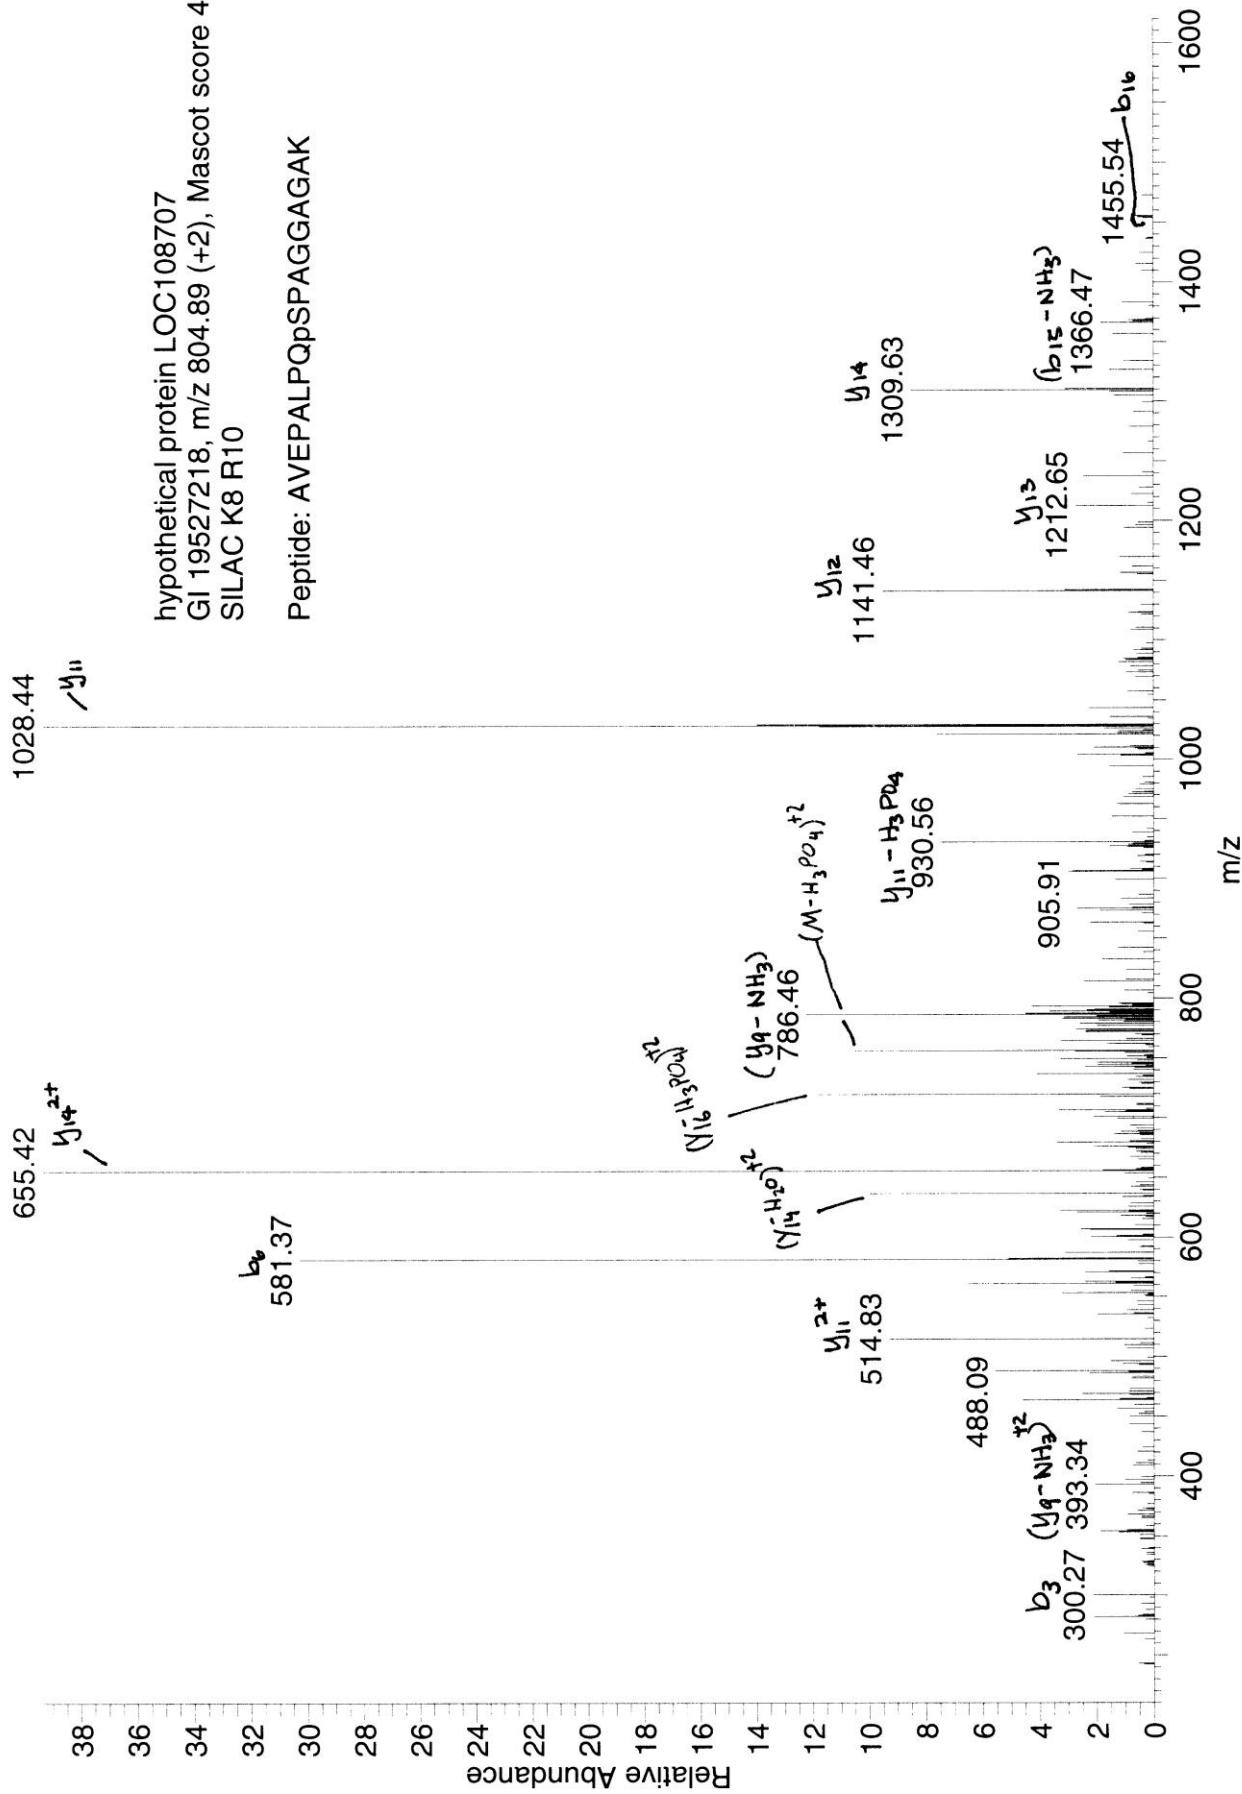

hypothetical protein LOC108707  
 GI 19527218, m/z 804.89 (+2), Mascot score 41  
 SILAC K8 R10

Peptide: AVEPALPQpSPAGGAGAK

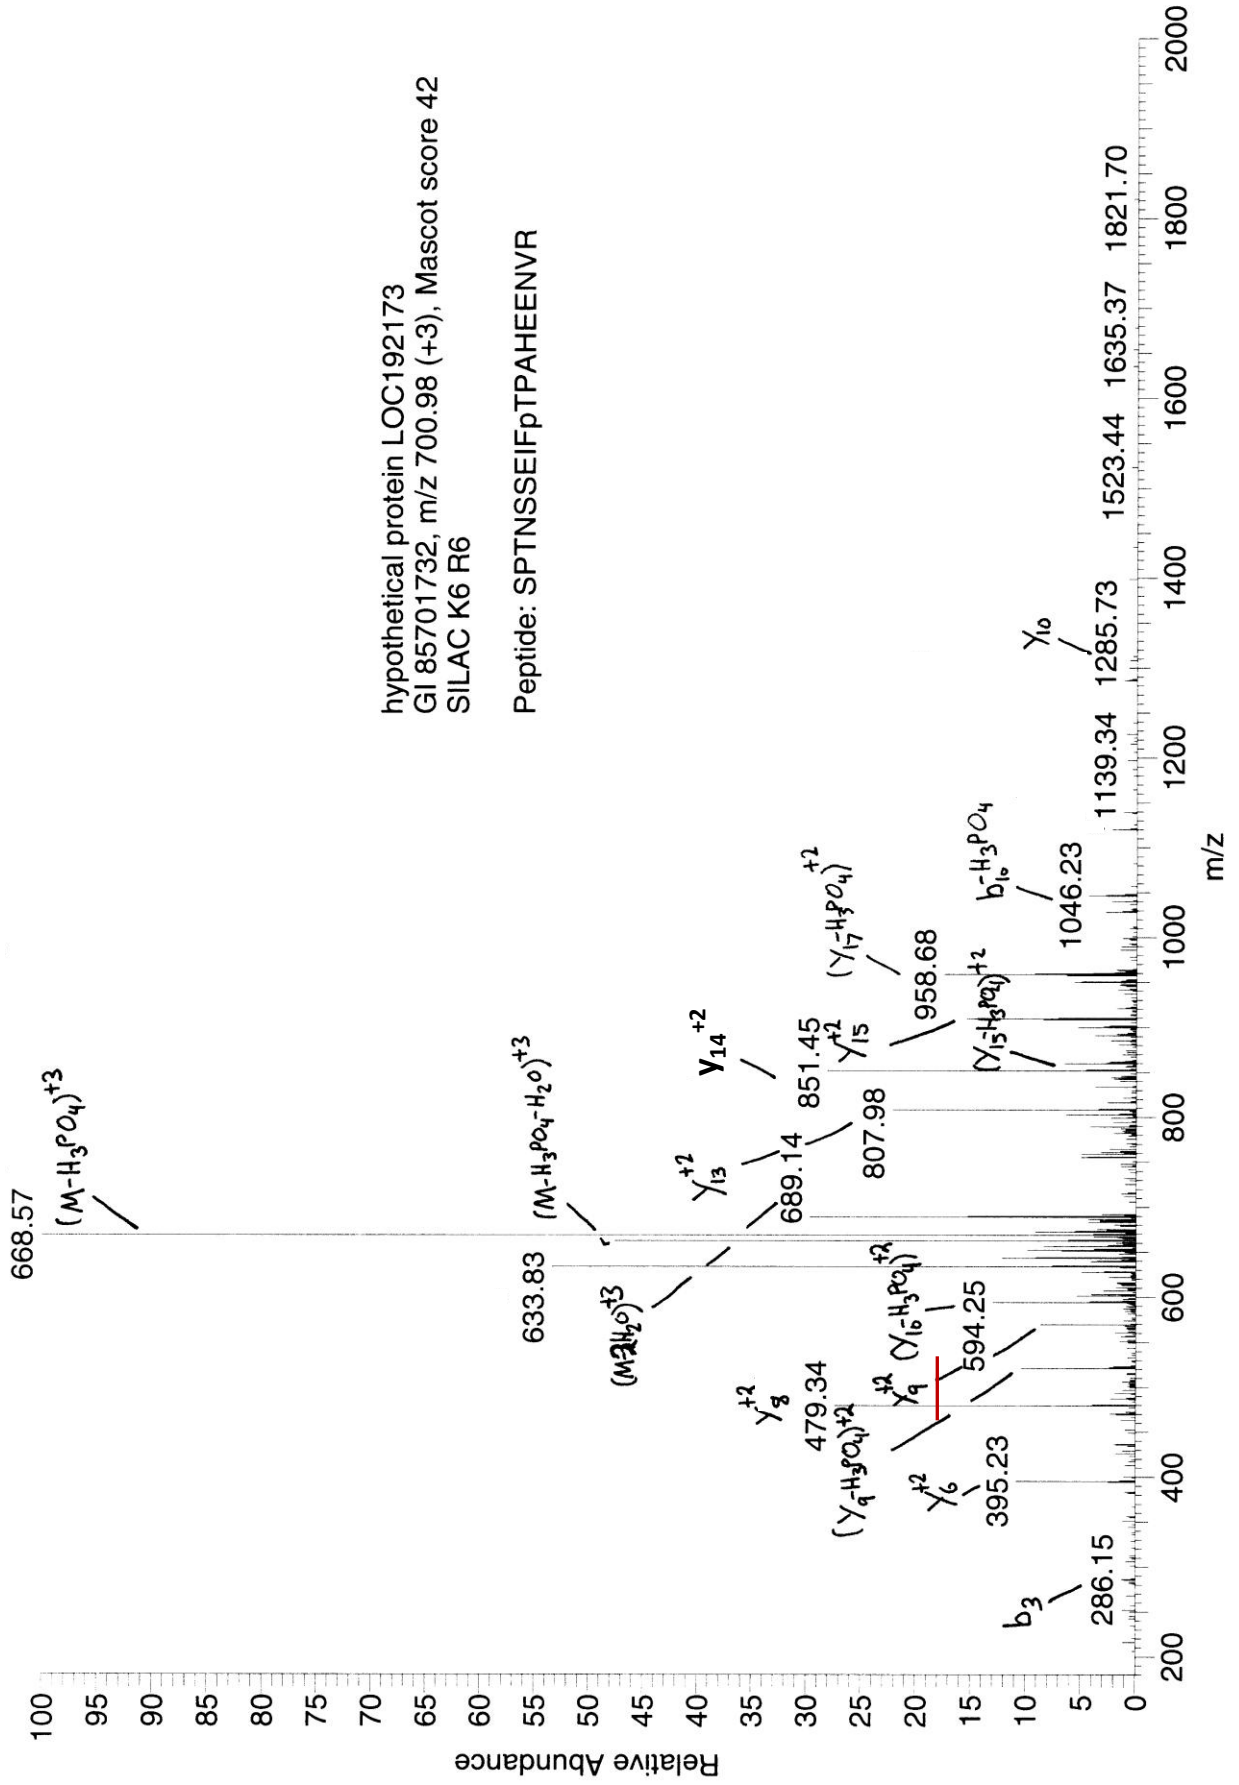

hypothetical protein LOC192173  
 GI 85701732, m/z 700.98 (+3), Mascot score 42  
 SILAC K6 R6

Peptide: SPTNSSEIFpTPAHEENVr

Hypothetical protein LOC217882  
 GI 154240682, m/z 797.87 (+2), Mascot score 26  
 SILAC K8 R10

Peptide: NGPSPTTPQpTPGPQK

Mixed spectrum  
 ✓ - not in synthetic spectrum  
 ✓ - in synthetic spectrum  
 Contaminant ion does not affect  
 SILAC quantitation.

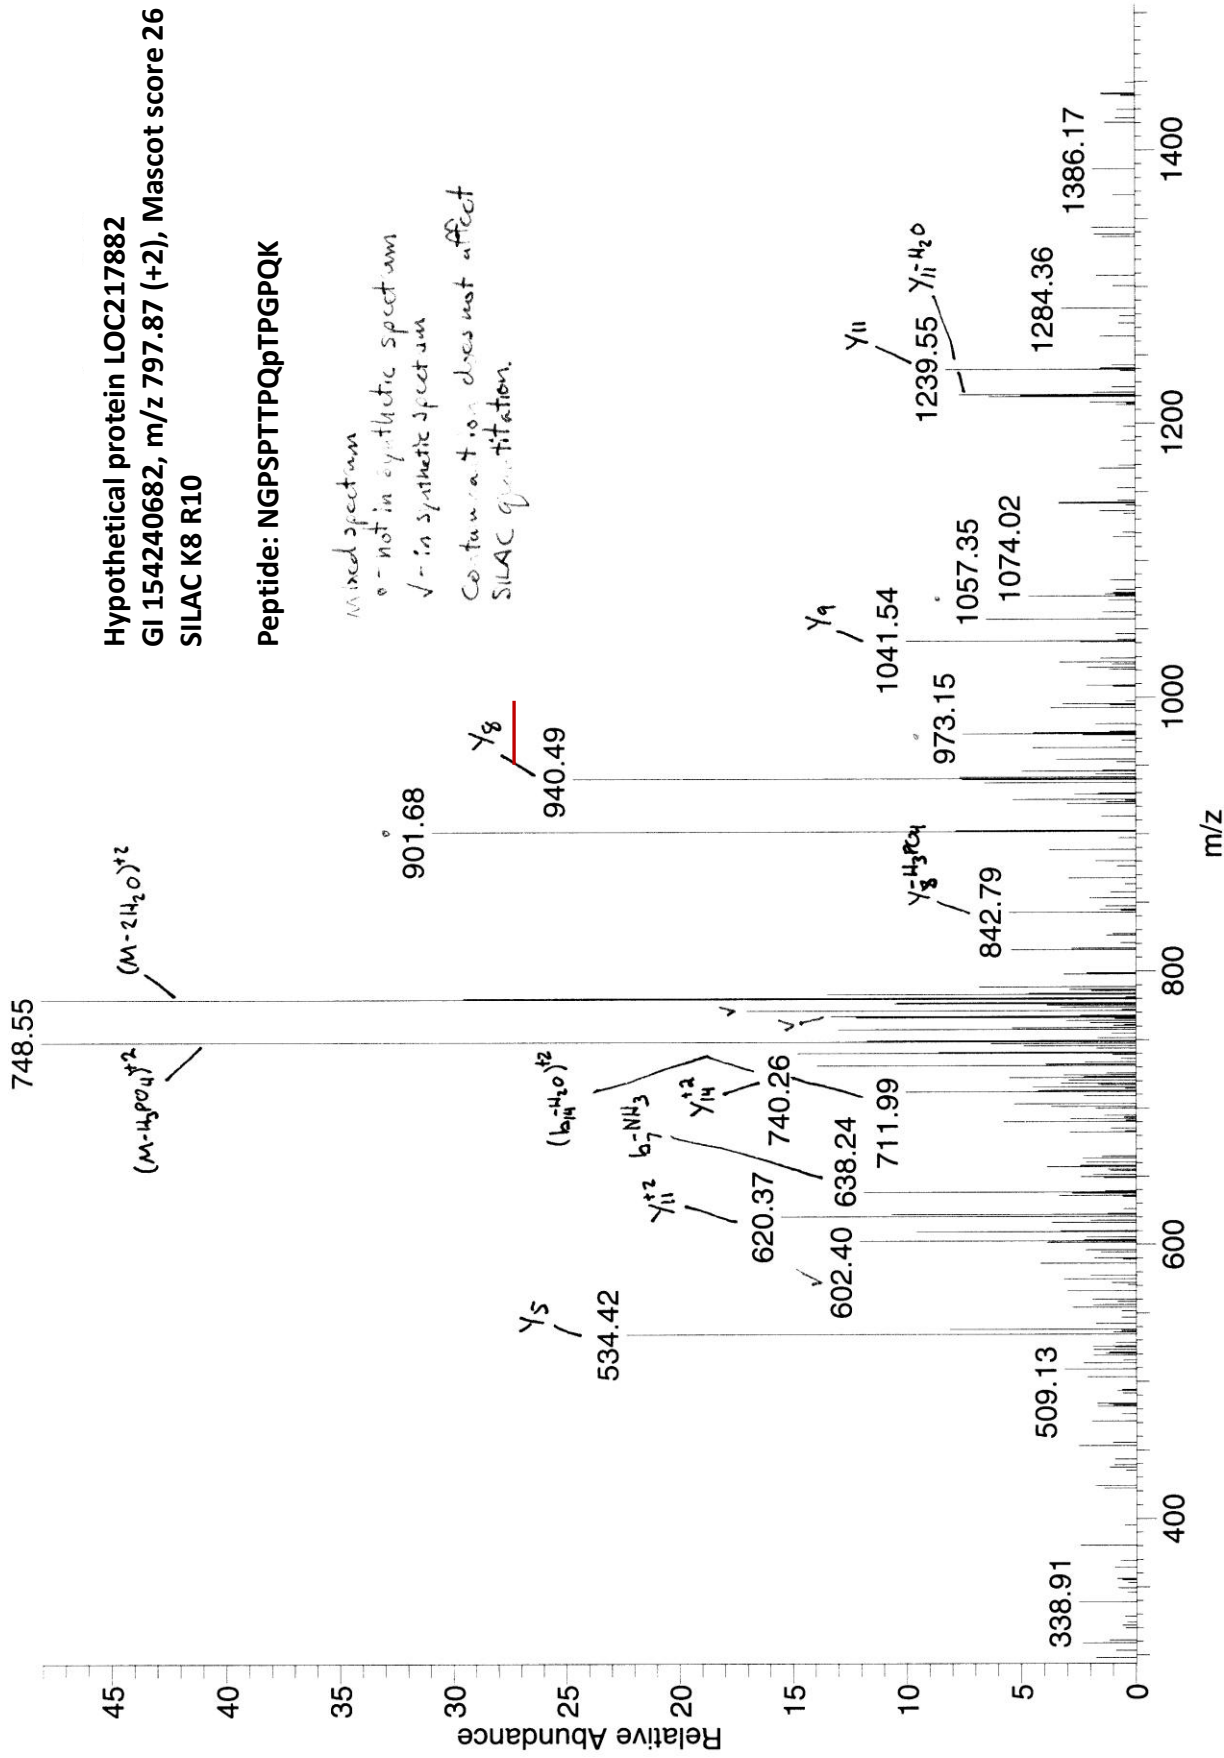

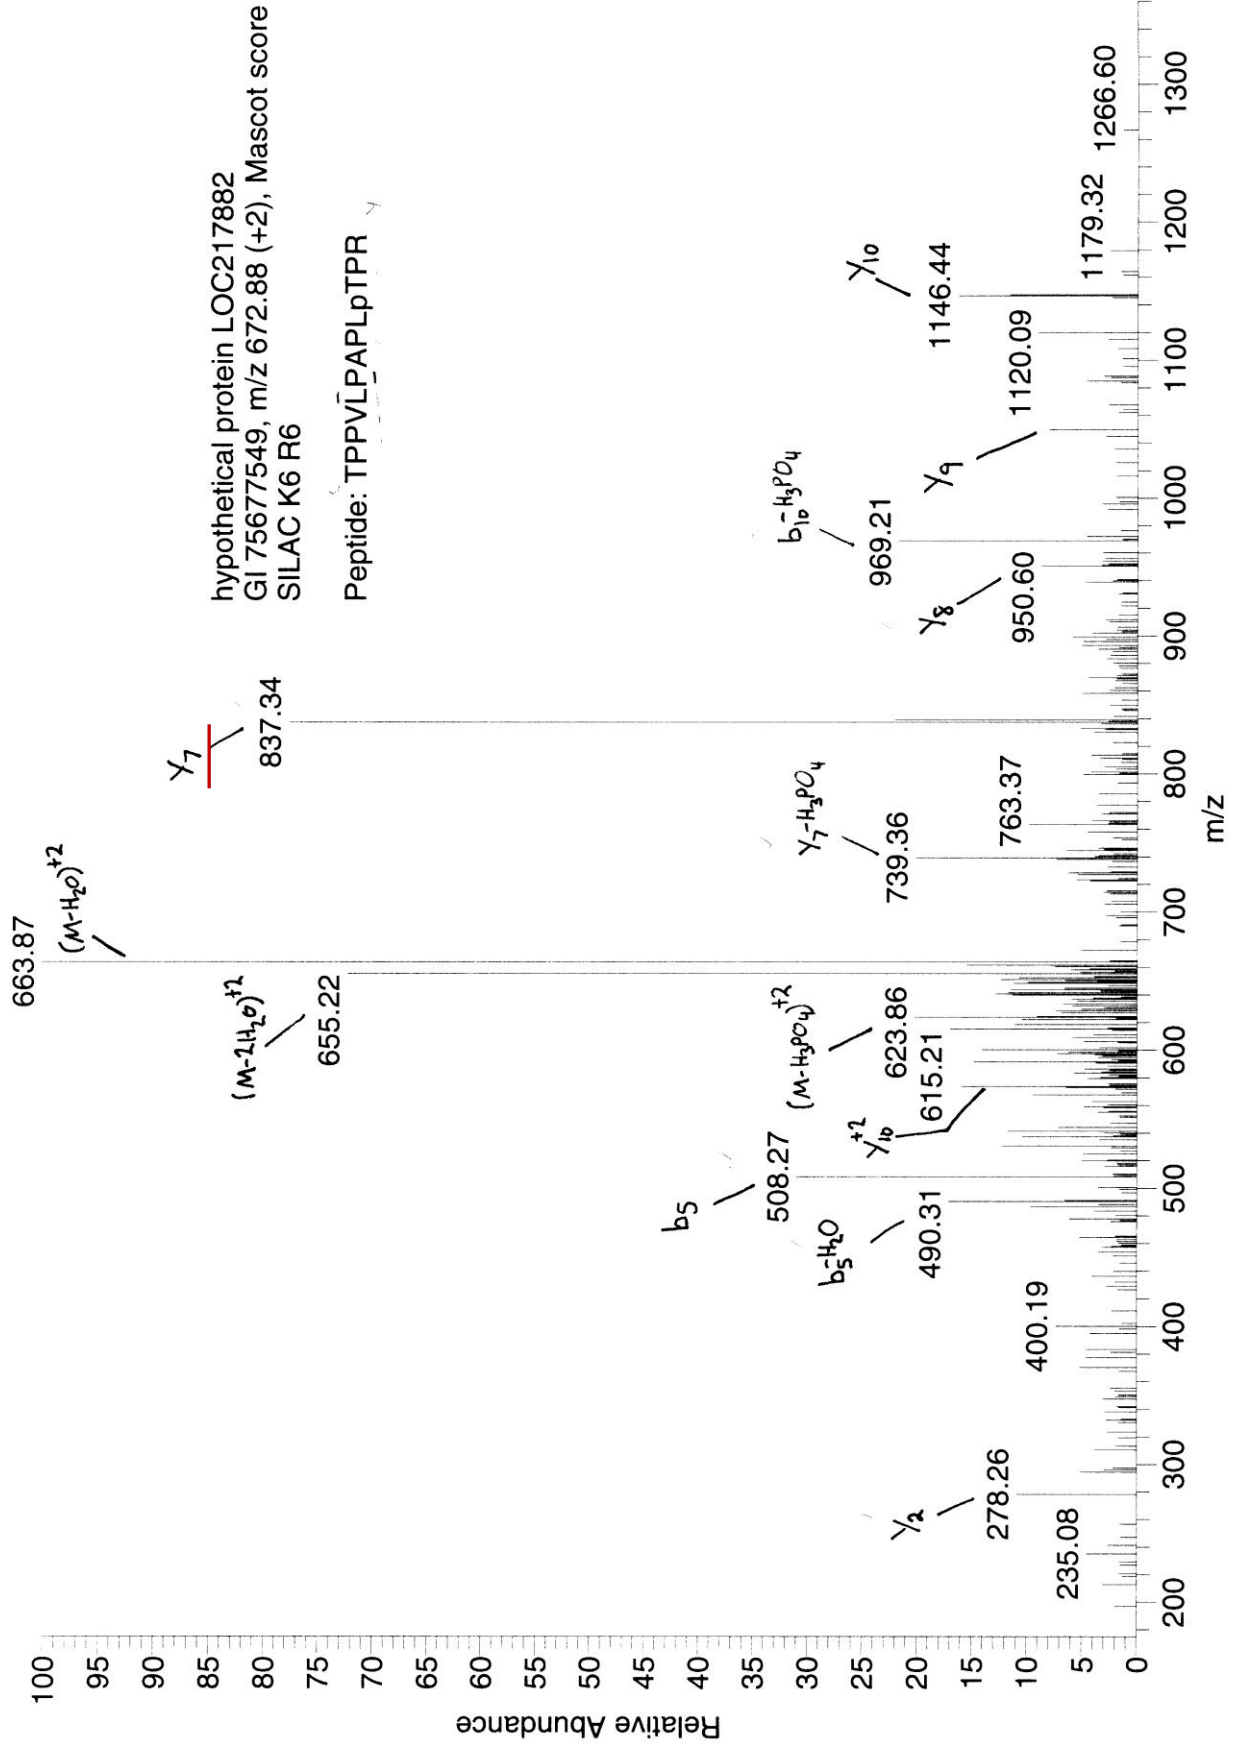

hypothetical protein LOC217882  
 GI 75677549, m/z 672.88 (+2), Mascot score 19  
 SILAC K6 R6

Peptide: TPPVLPAPLPTR



972.32

34

32

30

28

26

24

22

20

18

16

14

12

10

8

6

4

2

0

Relative Abundance

$\gamma_8$

$(M-2H_2O)^{+2}$

$(M-H_3PO_4)^{+2}$  869.04

$\gamma_4$

482.30

838.10

$(M-H_3PO_4+H_2O)^{+2}$

$b_7-2H_2O$

$b_7$

$b_7-H_2O$

765.26

$\gamma_5$

$\gamma_5-H_2O$

$b_6-NH_3$

$b_6$

663.34

$\gamma_5+H_2O$

550.18

$b_5+H_2O$

453.05

$\gamma_9$

1059.45

$\gamma_8+H_3PO_4$

$\gamma_7$

$\gamma_{16}+NH_3$

$b_{10}$

$\gamma_6+H_2O$

1110.23

$b_{11}-H_3PO_4$

$\gamma_{11}$

$b_{11}+H_3PO_4+H_2O$

$\gamma_{11}-H_2O$

$b_{11}$

1193.37

1274.38

1291.04

1432.73

1539.23

1400

1200

1000

800

600

400

0

m/z

hypothetical protein LOC75687  
GI 145301546, m/z 886.89 (+2), Mascot score 57  
SILAC K8 R10

Peptide: FSTYSQSPDPpTPSLR

$b_{14}+H_2O$

1588.61

$\gamma_{12}$

1539.23

1600

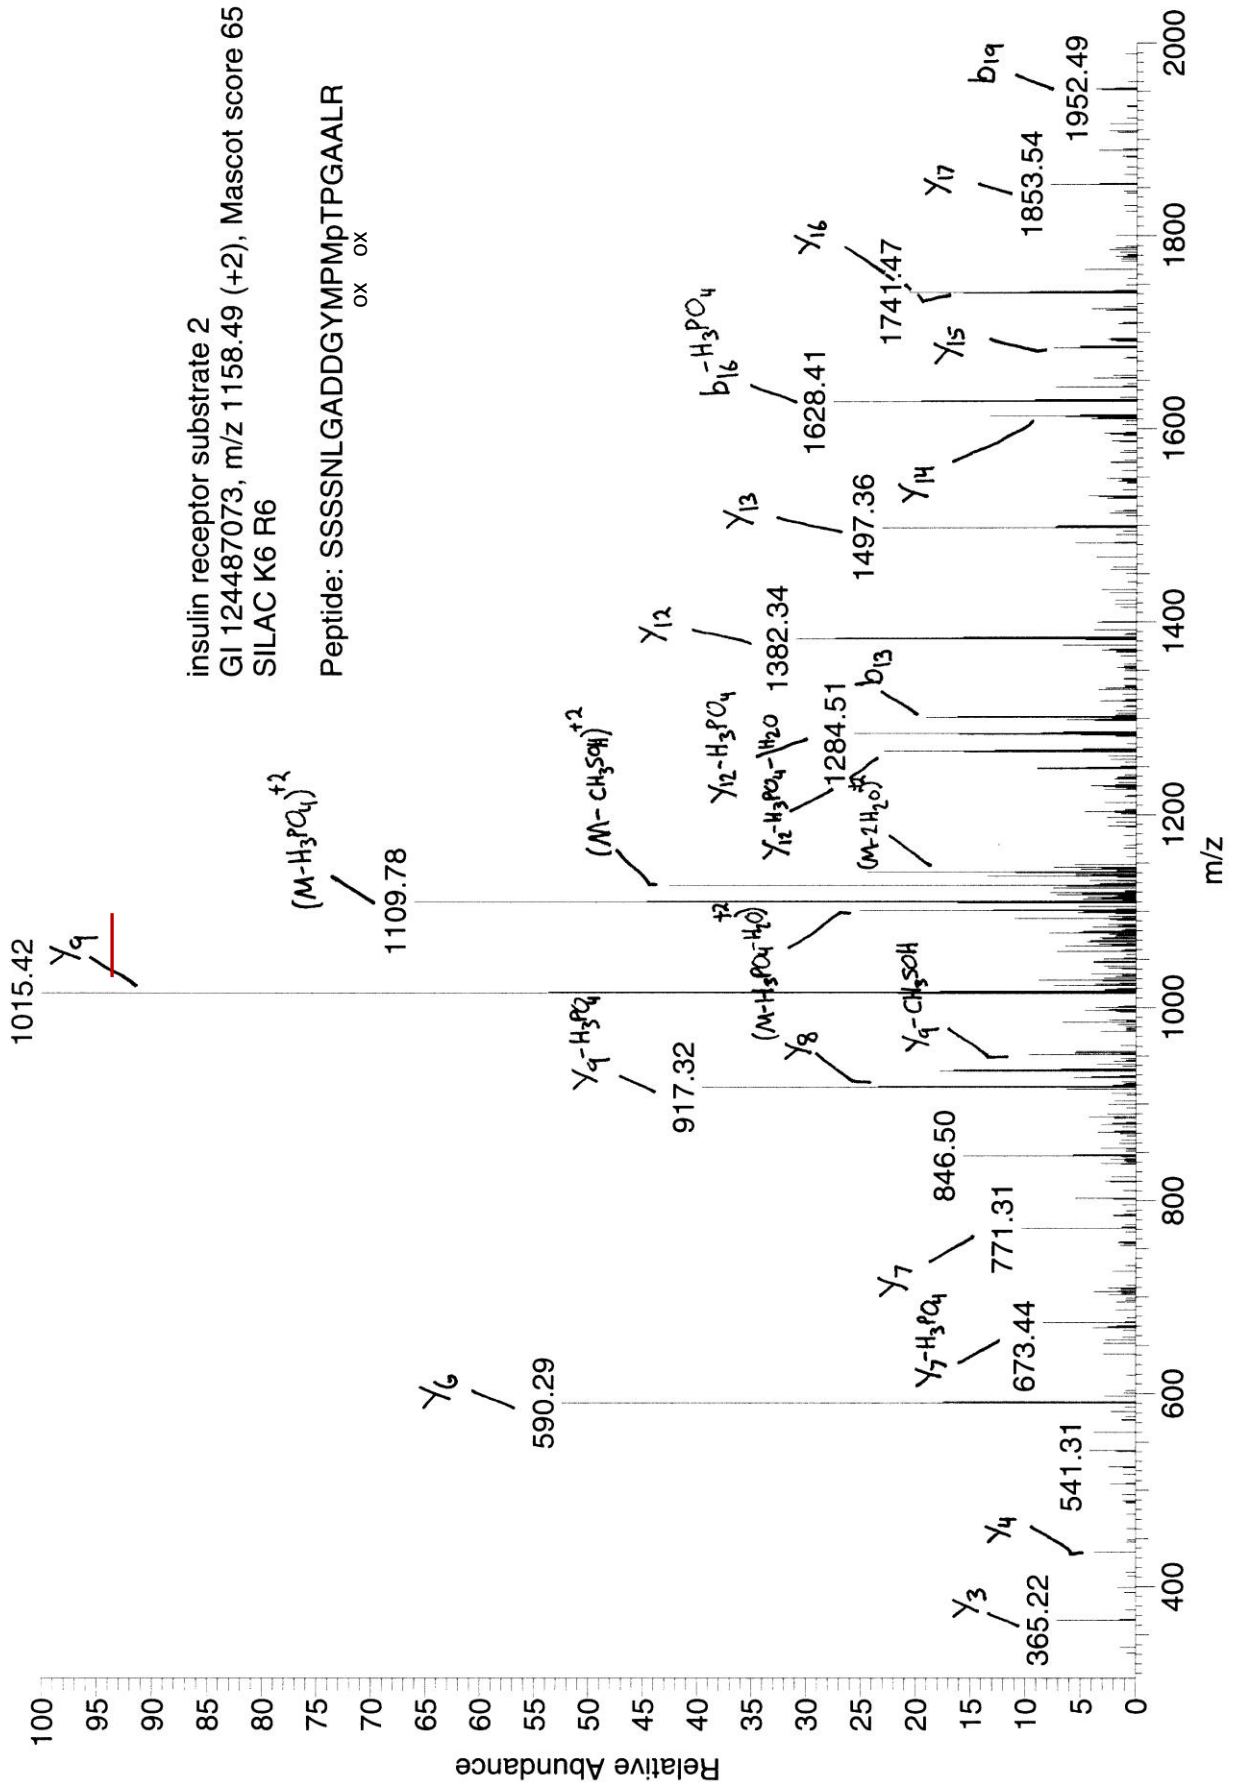

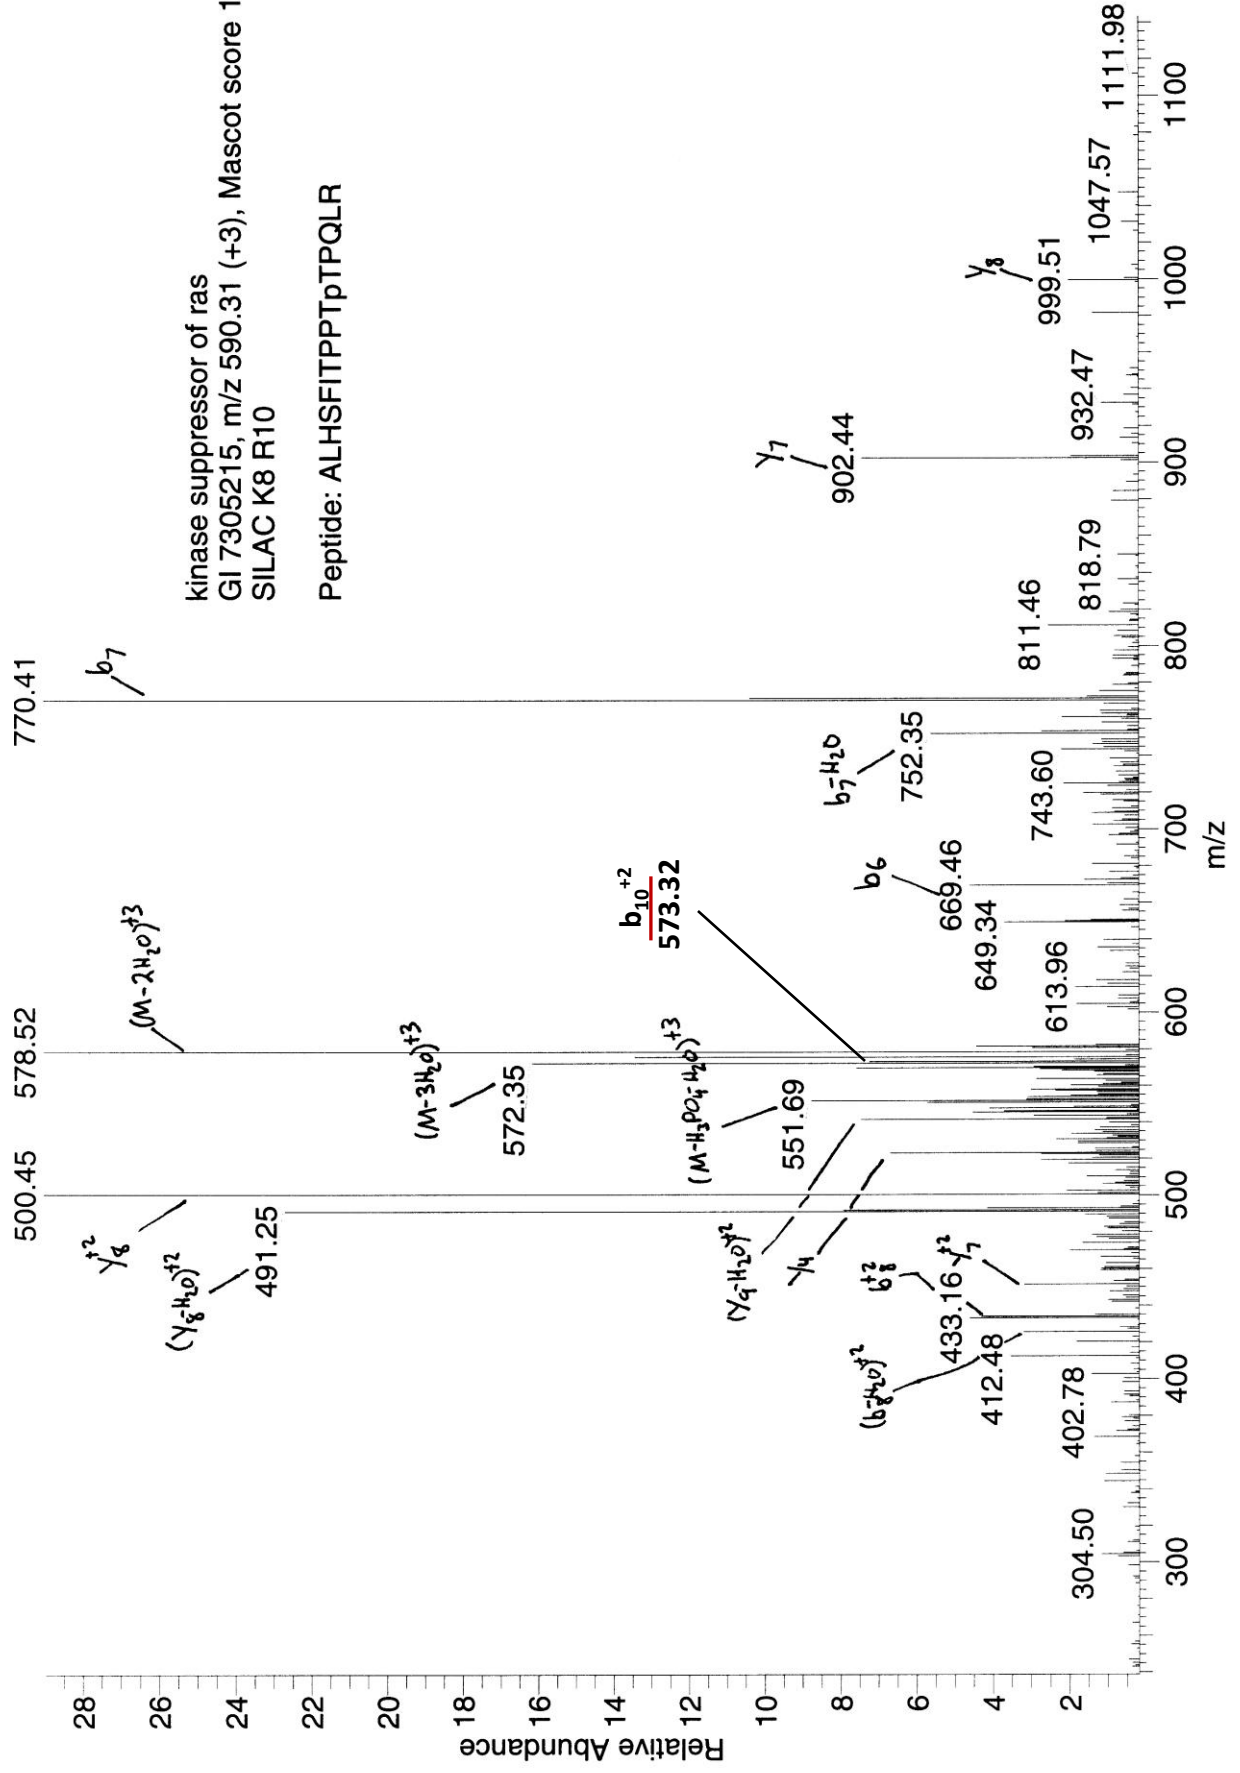

**La related protein**

GI 226442901 m/z 881.74 (+3), Mascot score 66  
SILAC K6 R6

Peptide: GSEPATYMPVSVAPPpTPAWQPETK  
ox

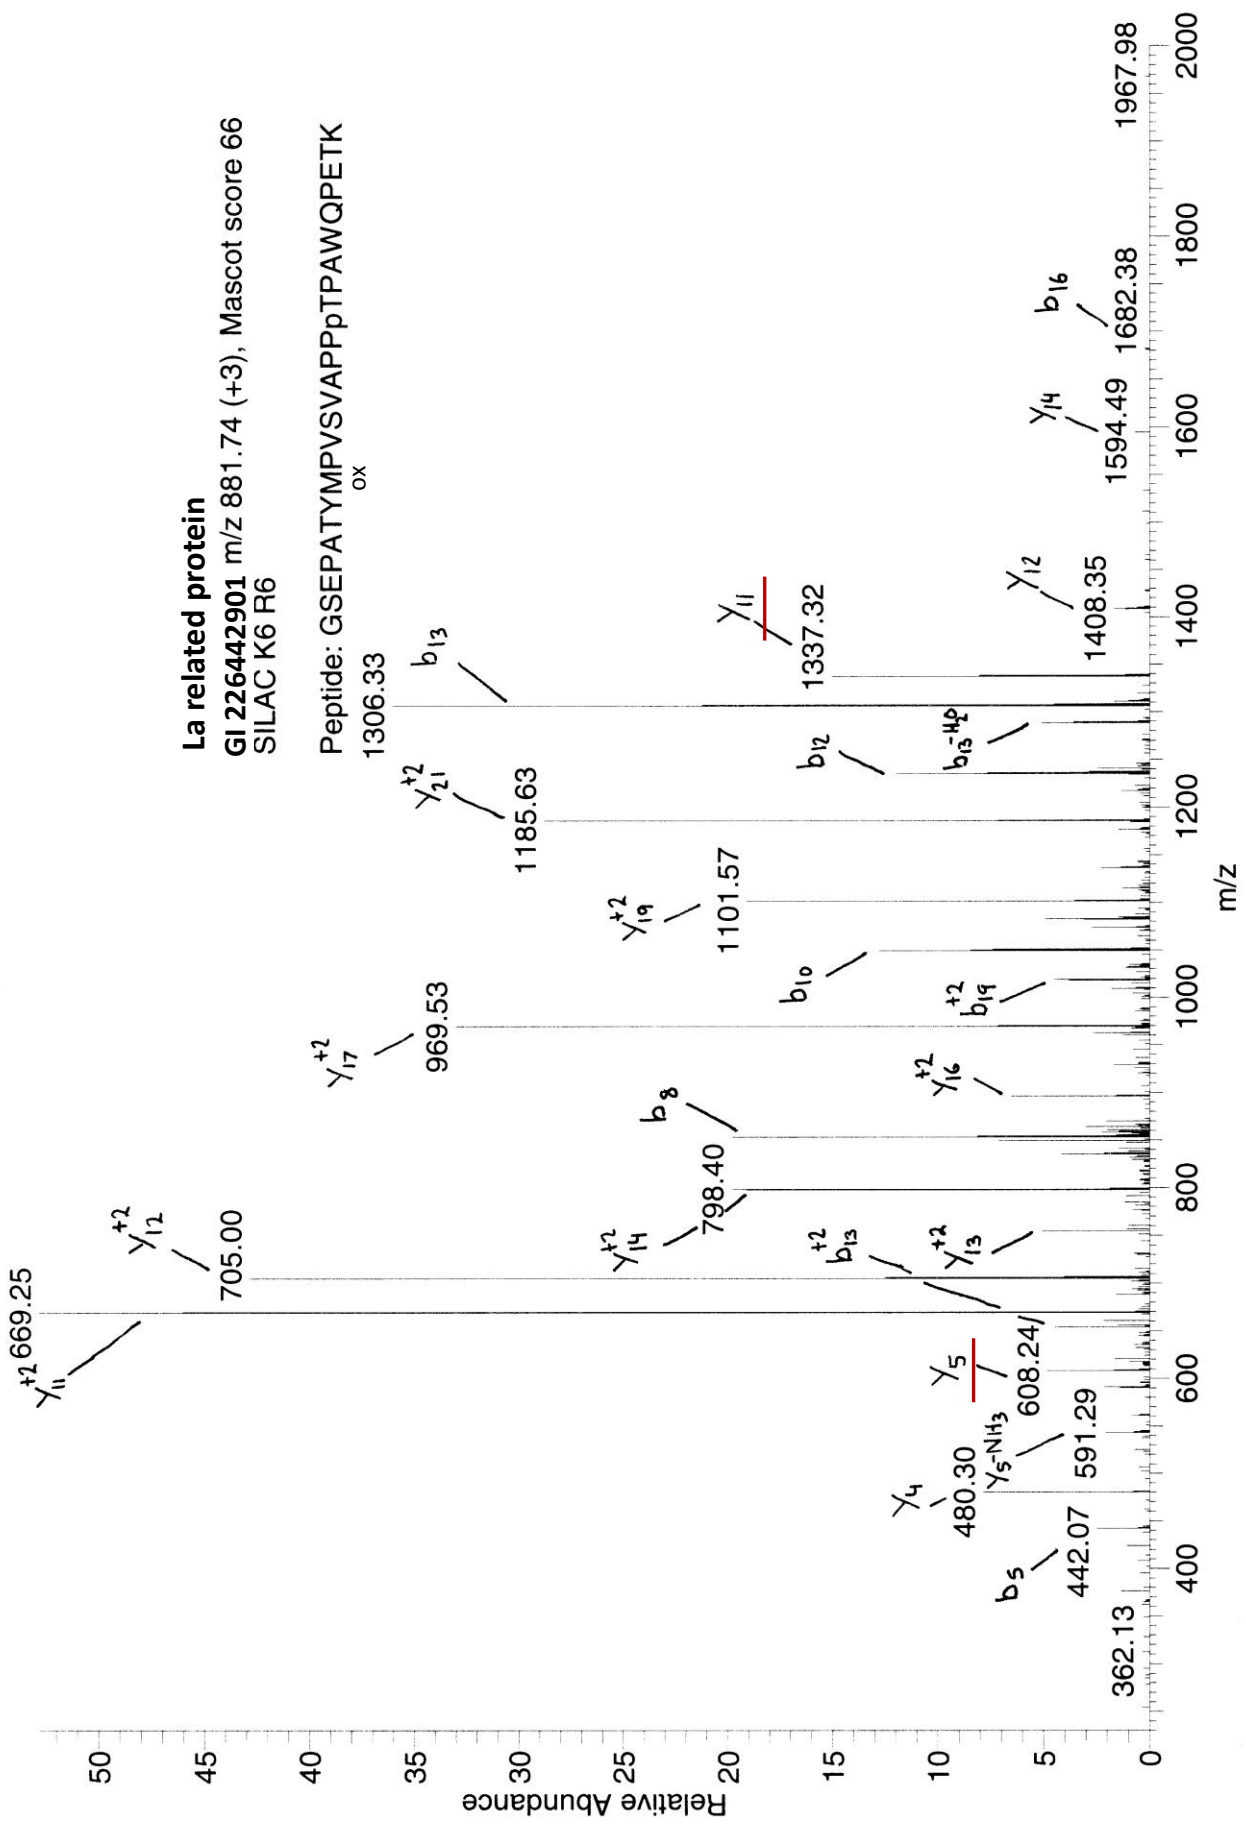

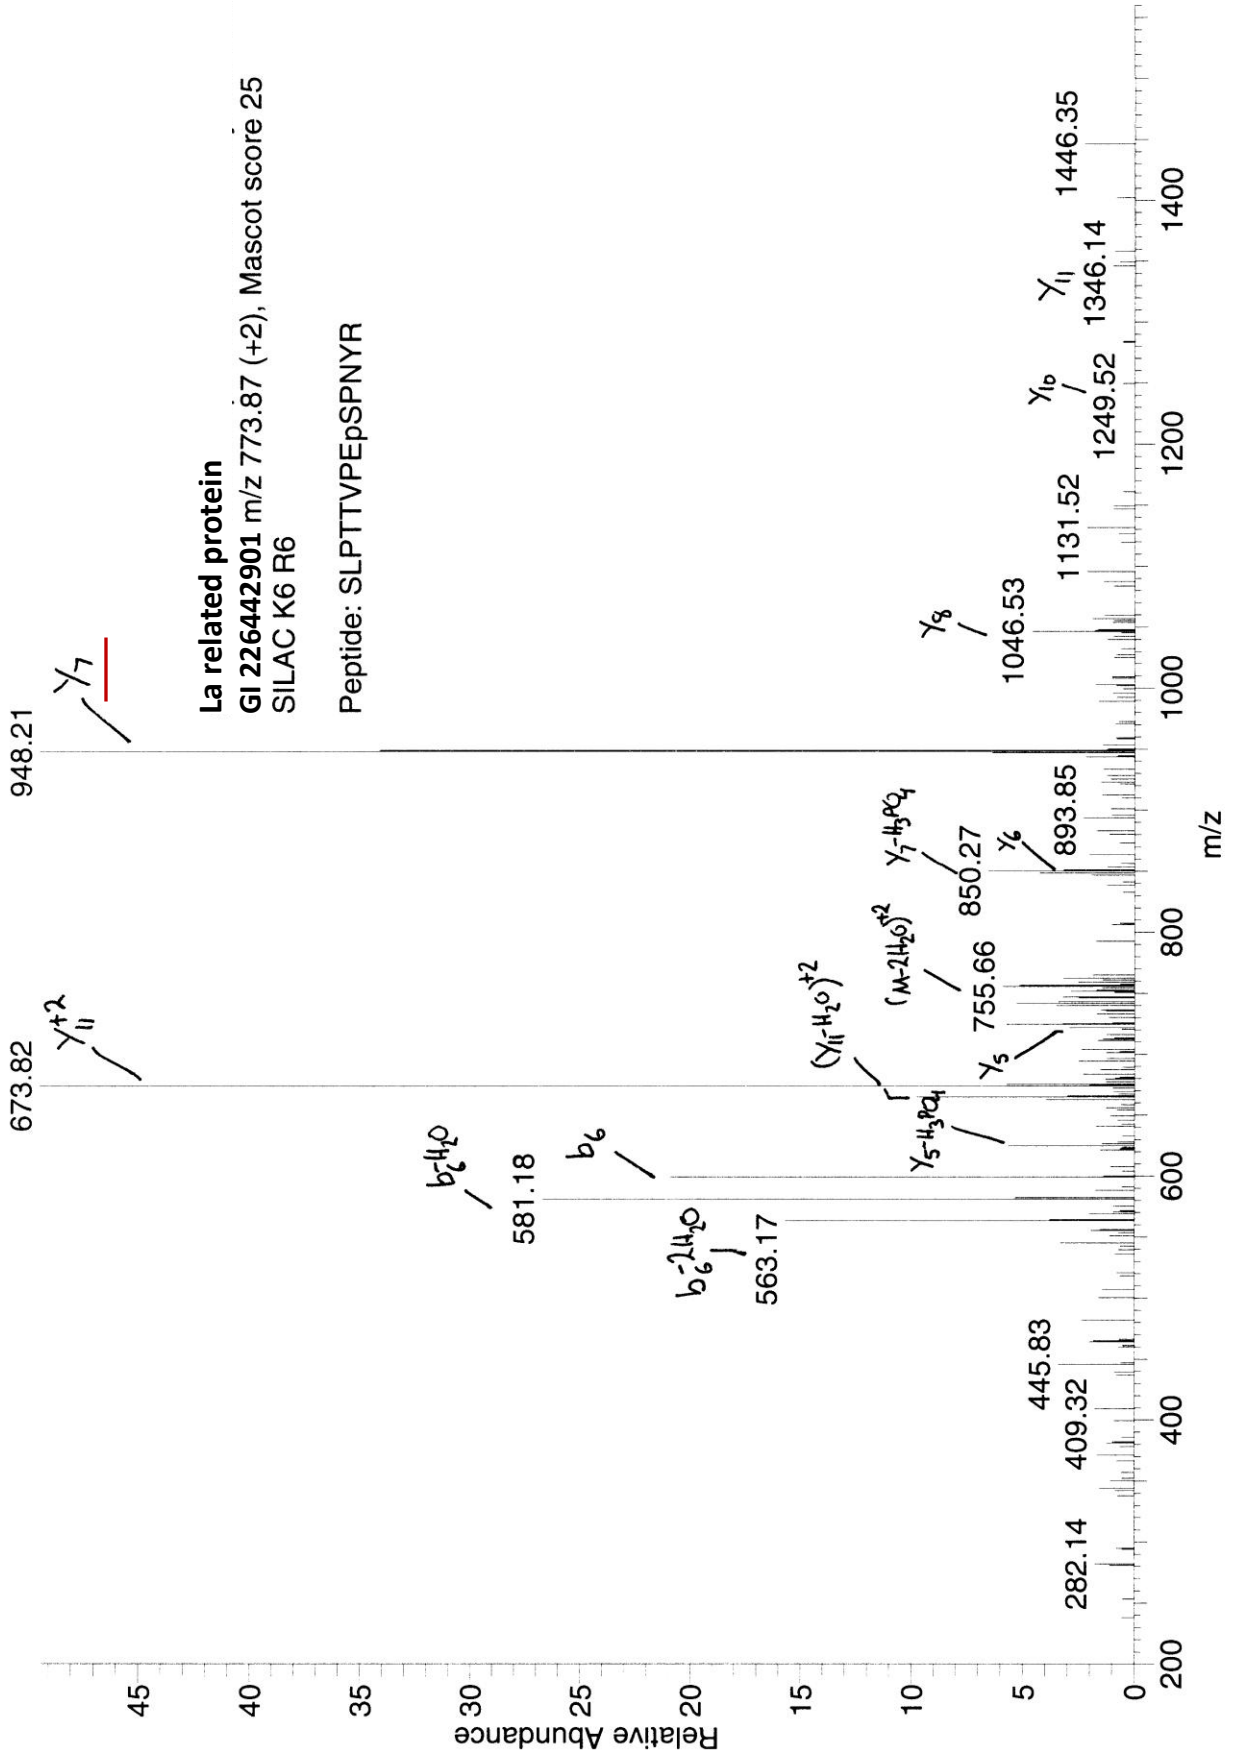

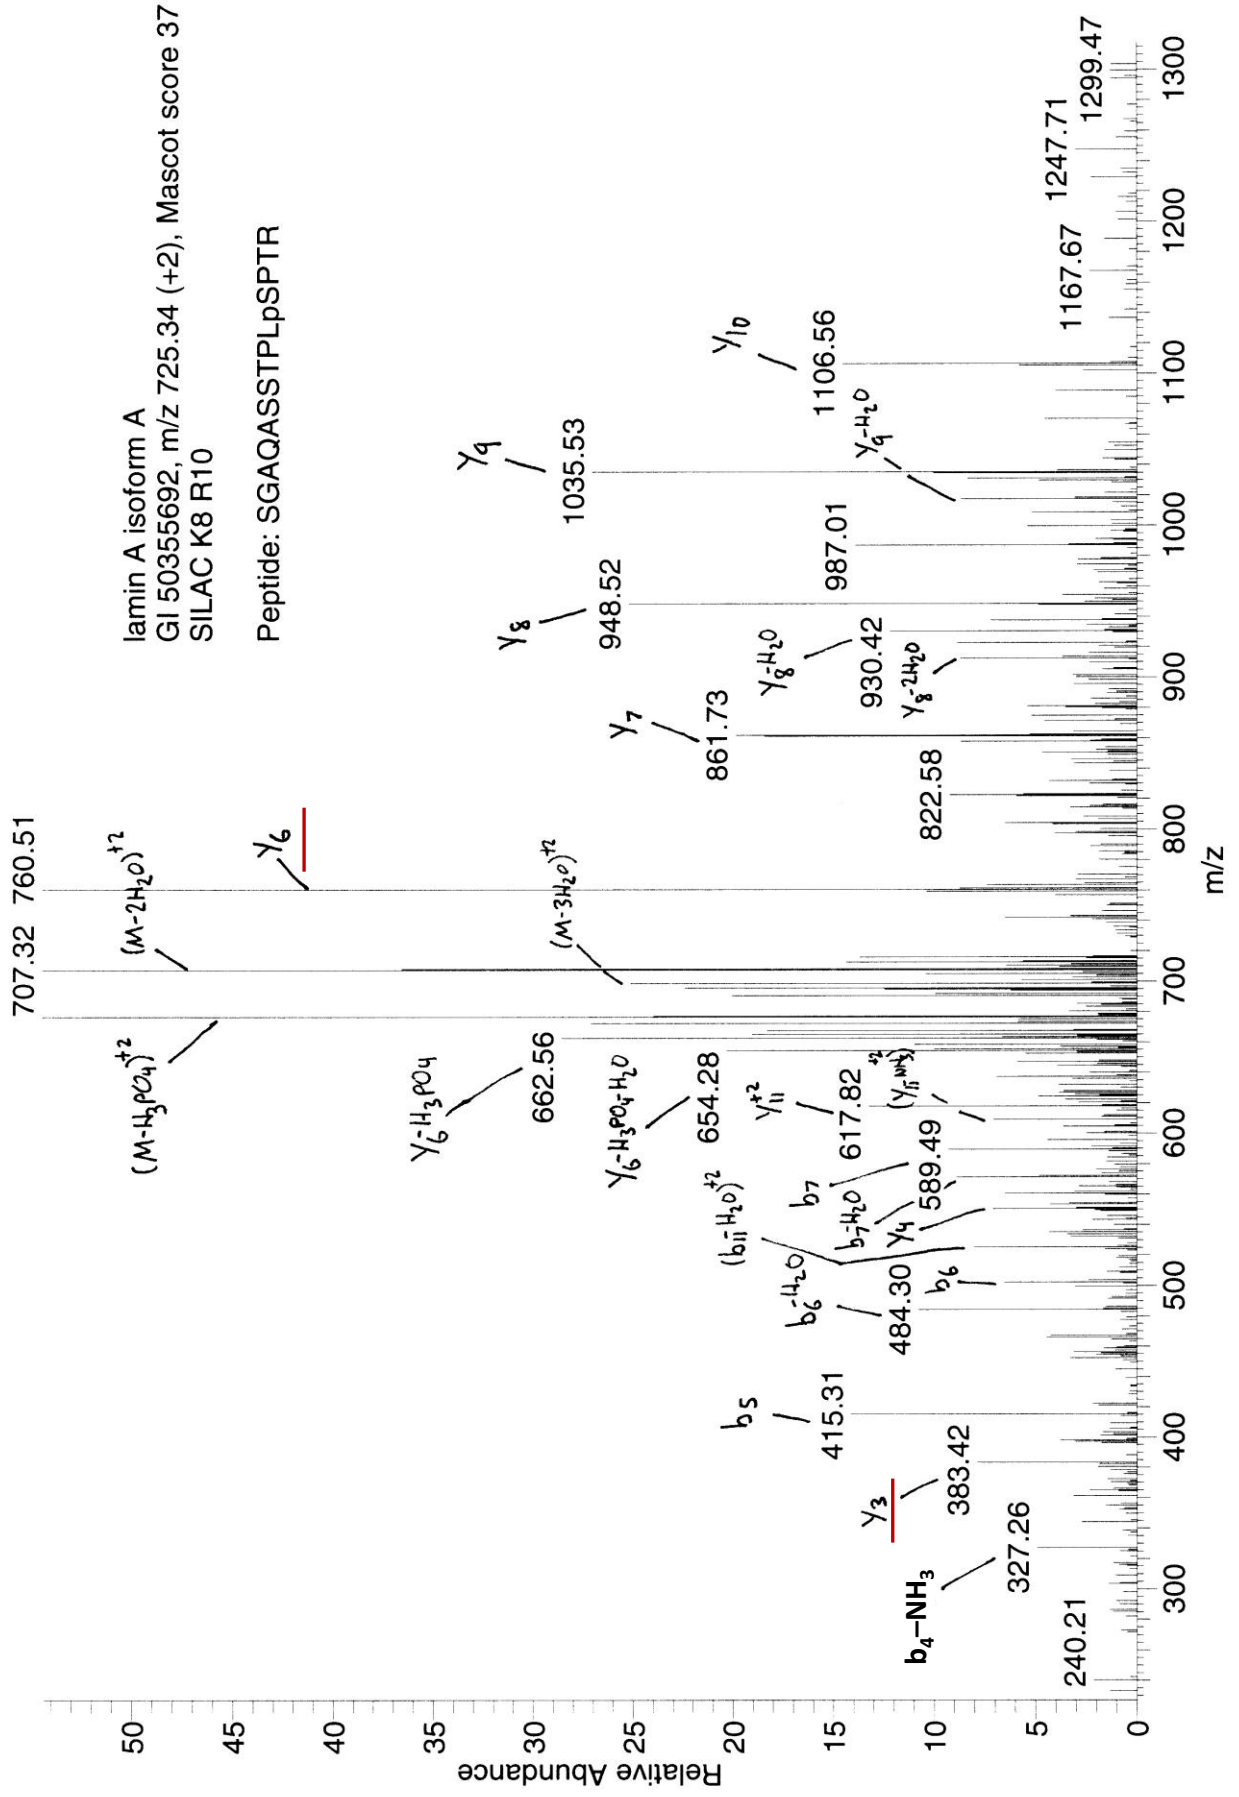



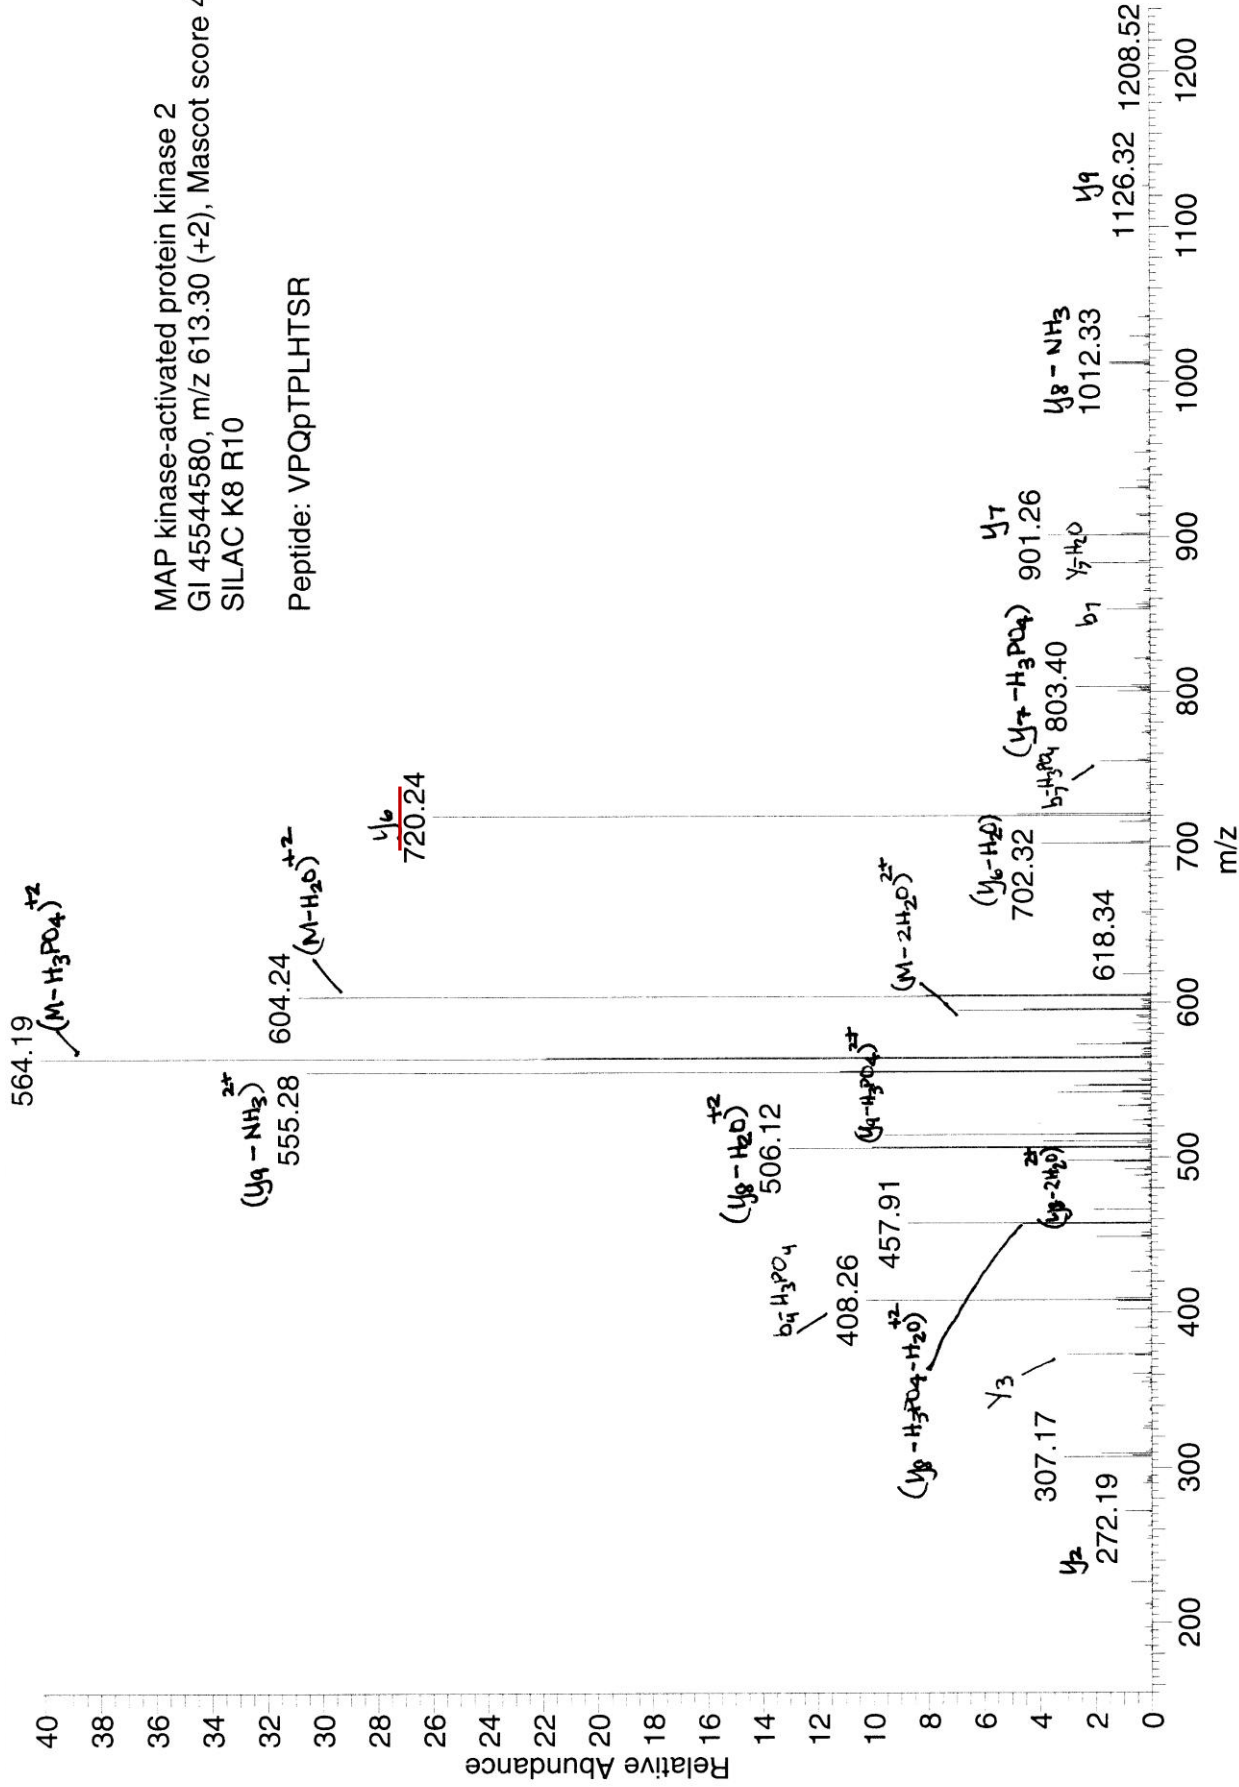

MAP kinase-activated protein kinase 2  
 GI 45544580, m/z 613.30 (+2), Mascot score 47  
 SILAC K8 R10  
 Peptide: VPQpTPLHTSR



microtubule-associated protein 1 A  
 GI 124244033, m/z 593.32 (+2), Mascot score 46  
 SILAC K8 R10

Peptide: ALALVPGpTPTR

Mixed peptide.  
 Not in synthetic spectrum  
 as in synthetic spectrum  
 Contains most is, 593.32 does not fit  
 SILAC quantitation.

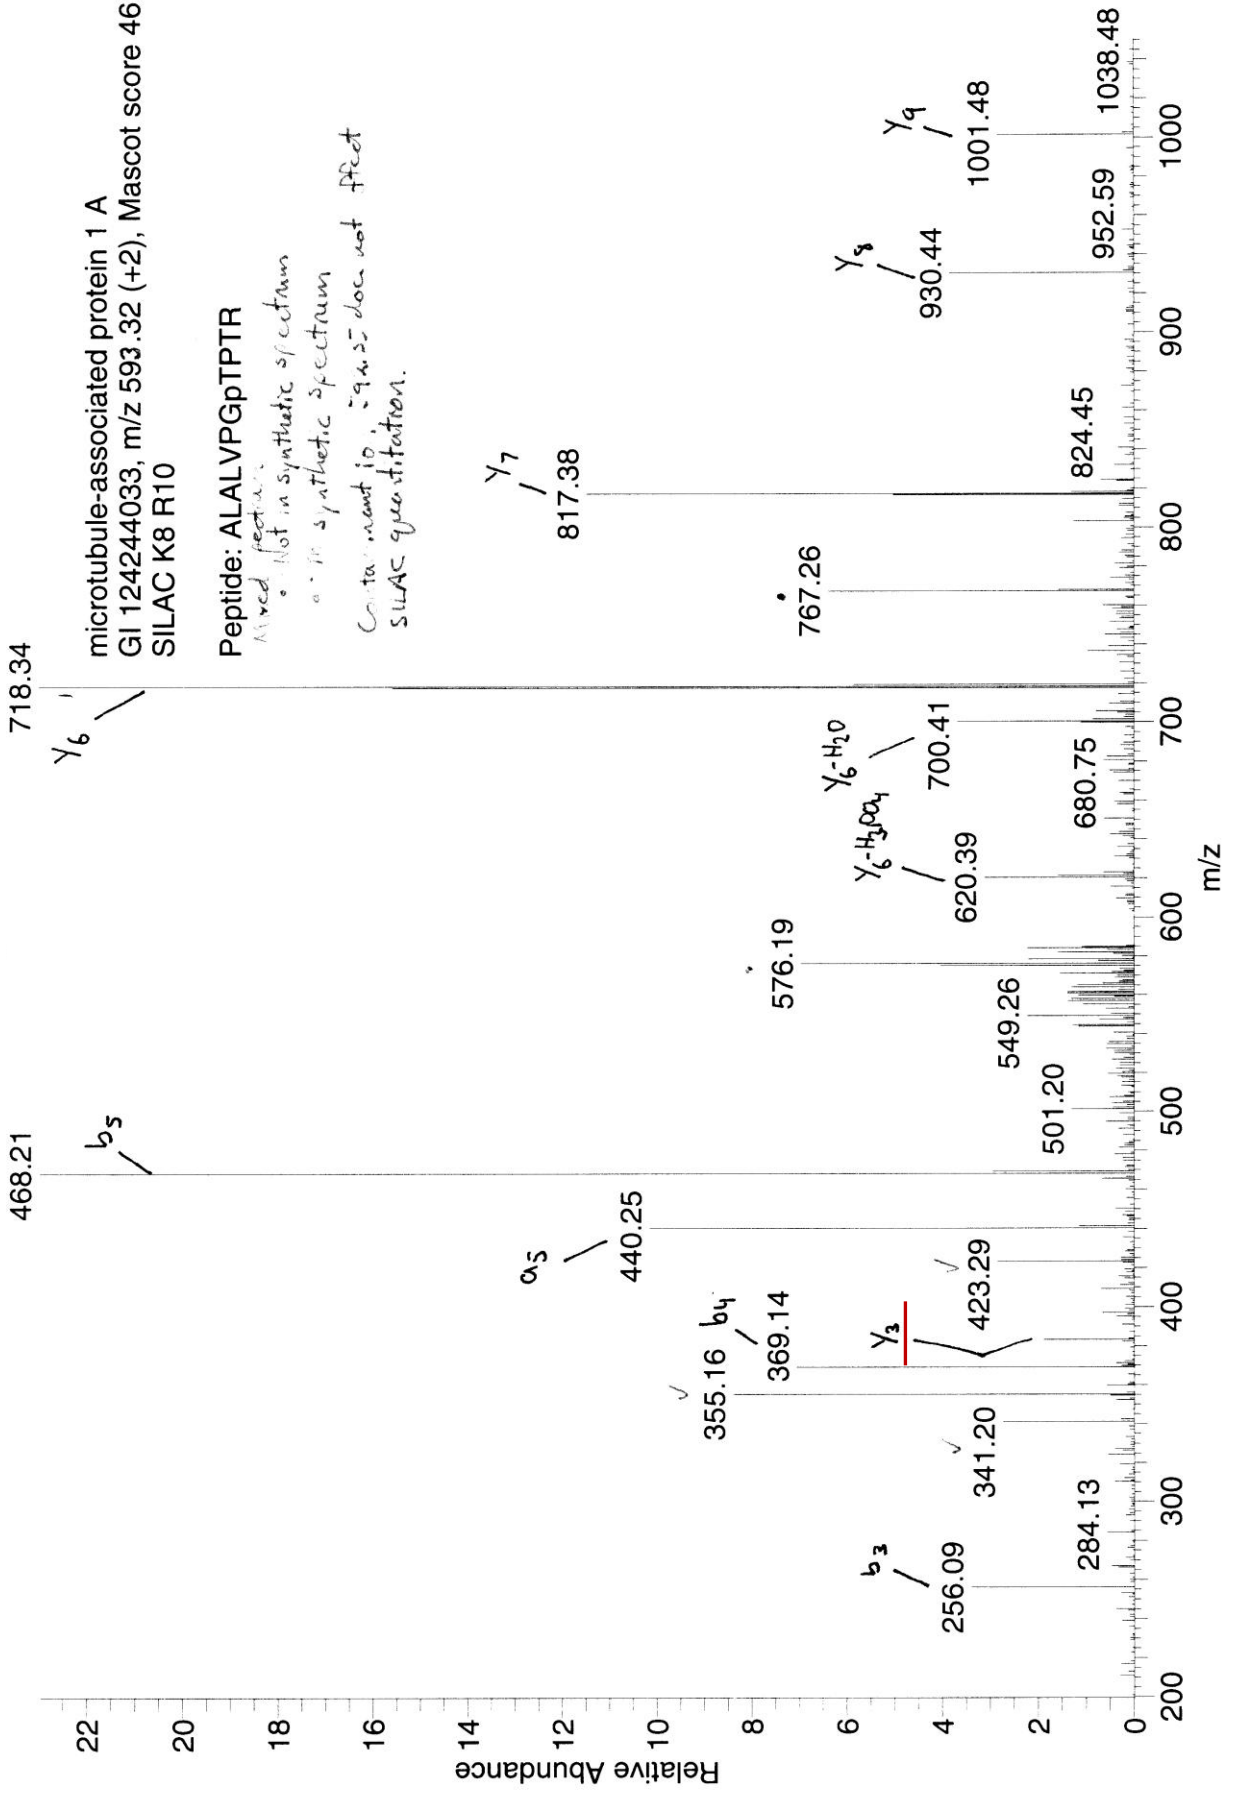

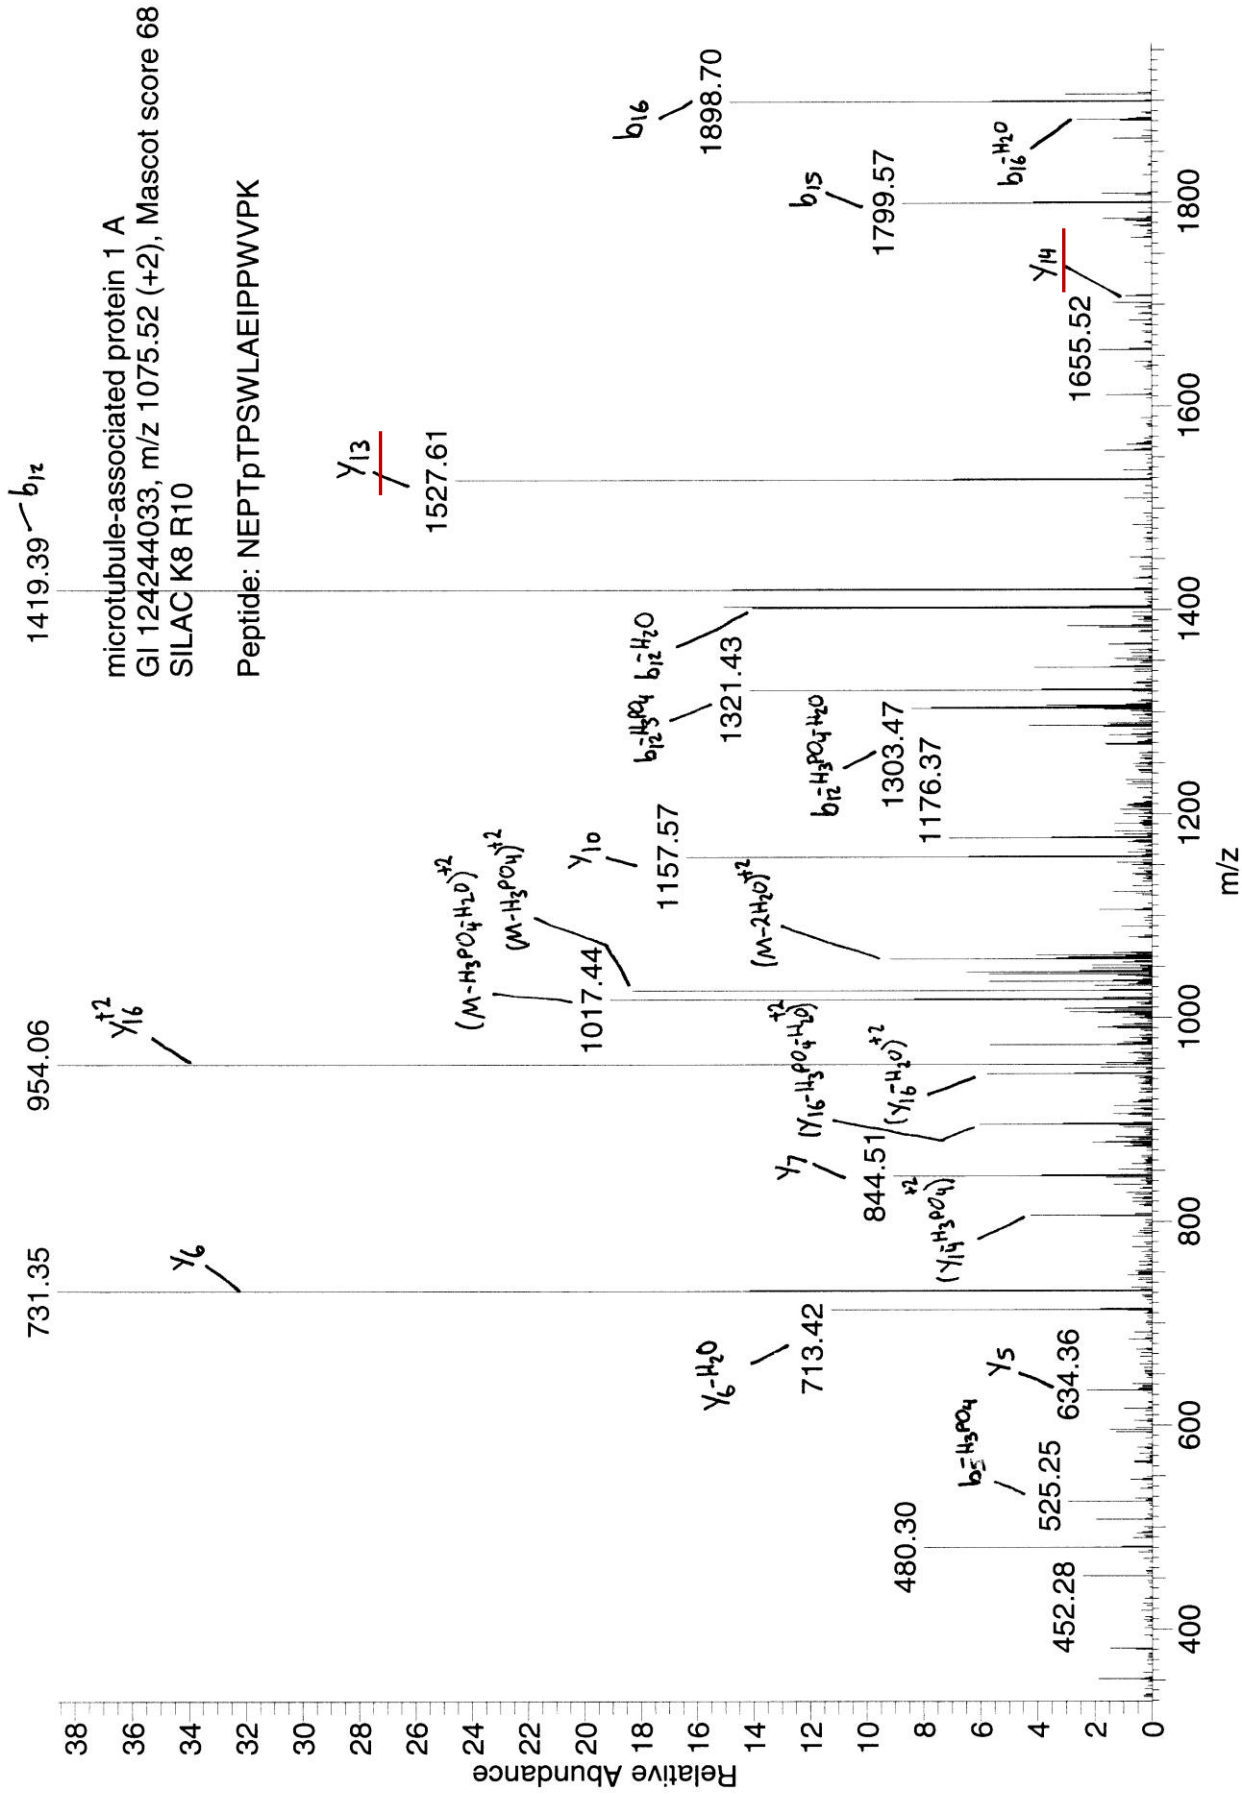

microtubule-associated protein 1 B  
GI 6678946, m/z 538.25 (+2), Mascot score 33  
SILAC K8 R10

Peptide: SDISPLpTPR

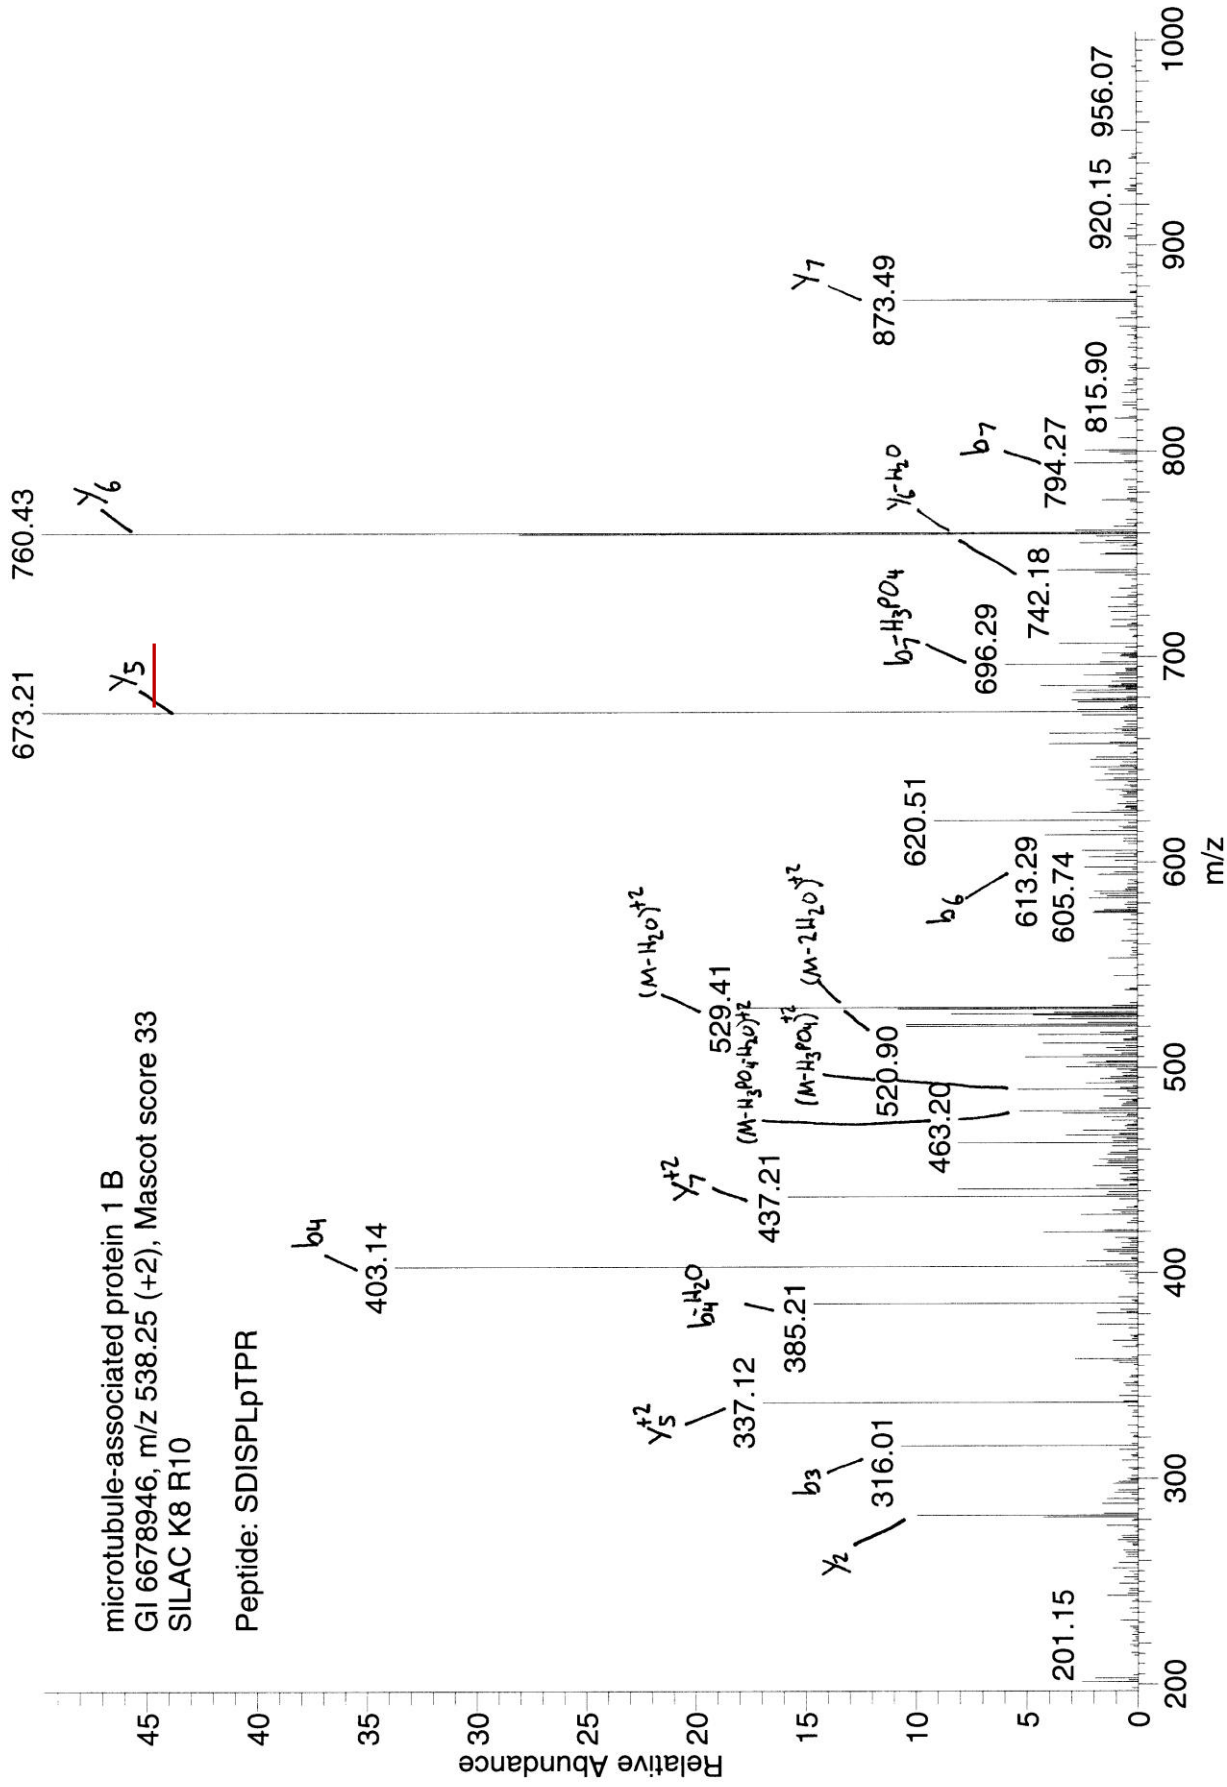

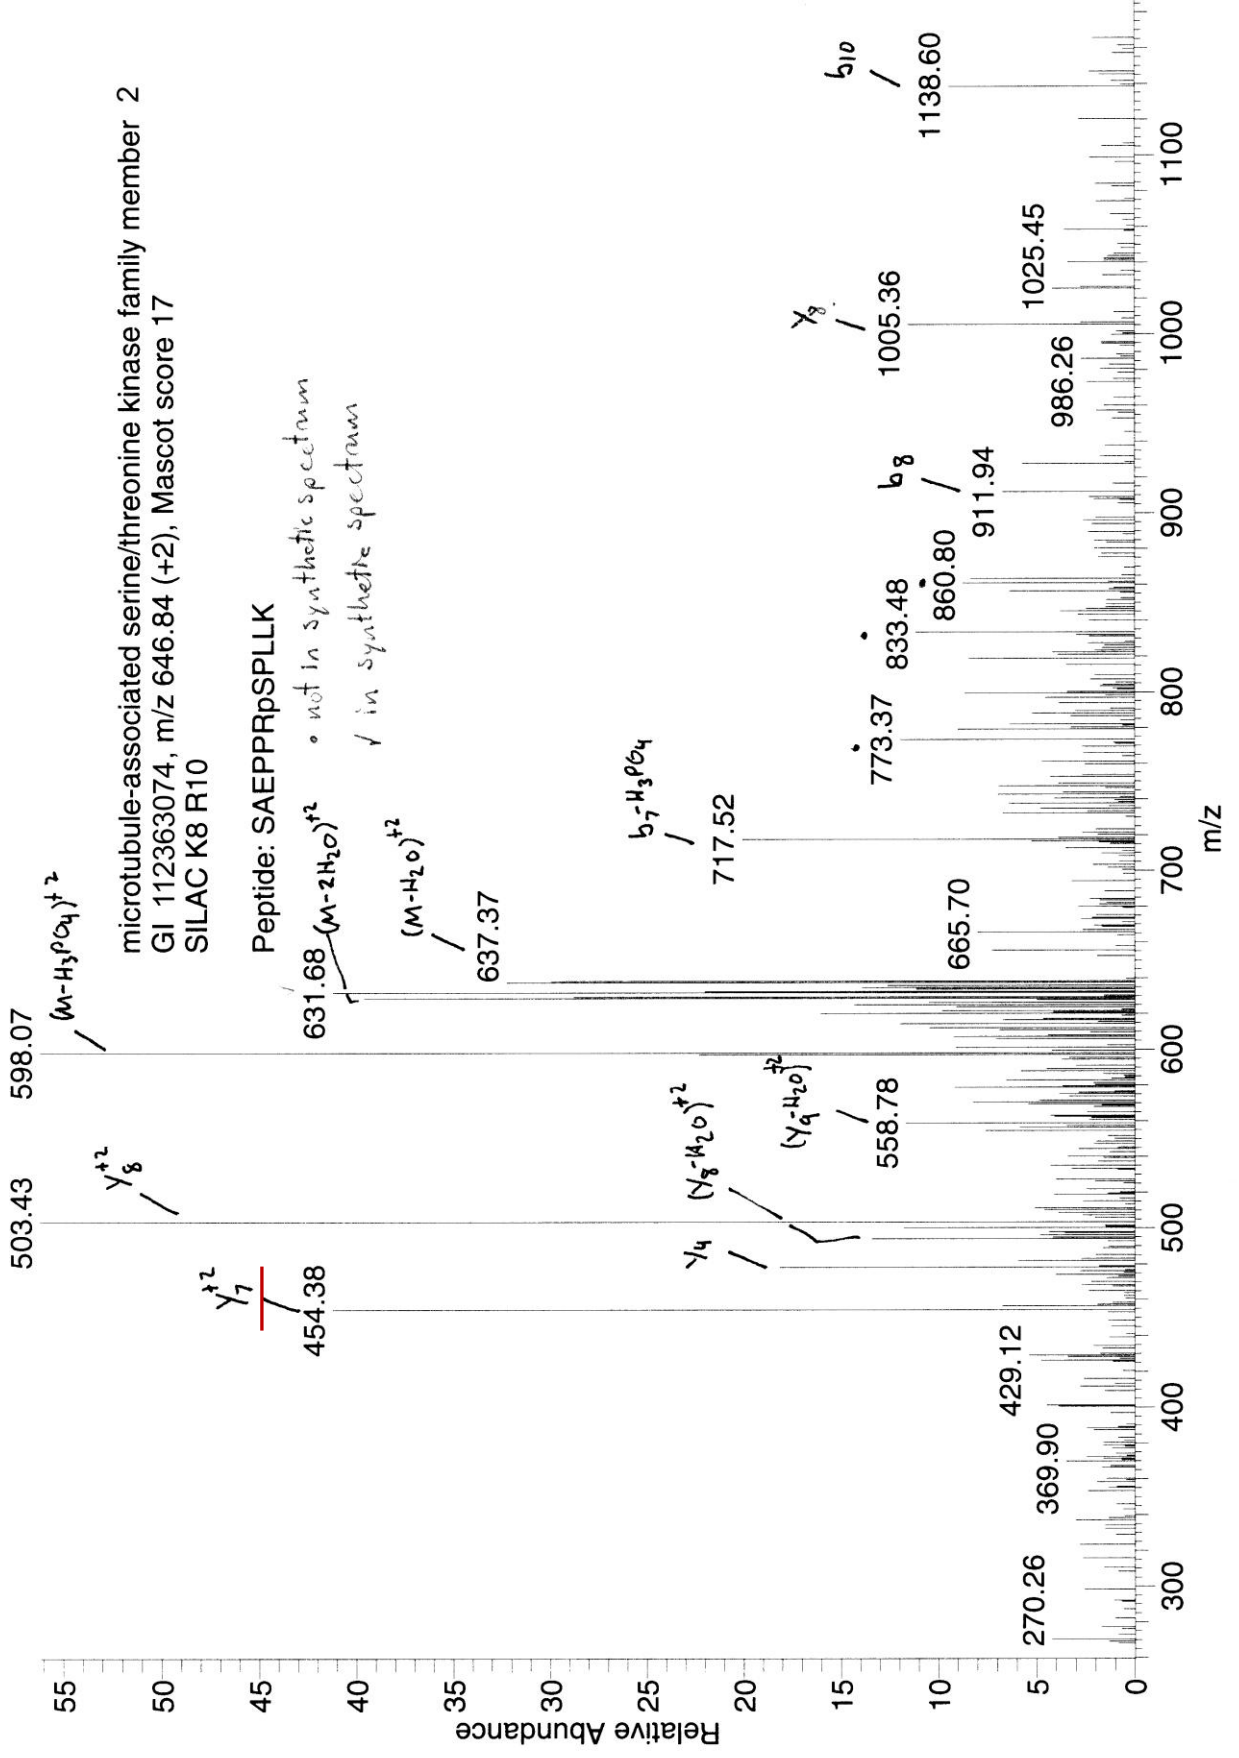

microtubule-associated serine/threonine kinase family member 2  
 GI 112363074, m/z 646.84 (+2), Mascot score 17  
 SILAC K8 R10

Peptide: SAEPPRpSPLLK

• not in synthetic spectrum  
 ✓ in synthetic spectrum

MYB binding protein (P160) 1a  
GI 31982724, m/z 970.97 (+2), Mascot score 41  
SILAC K8 R10

Peptide: LSQVNGATPVpSPIEPESK

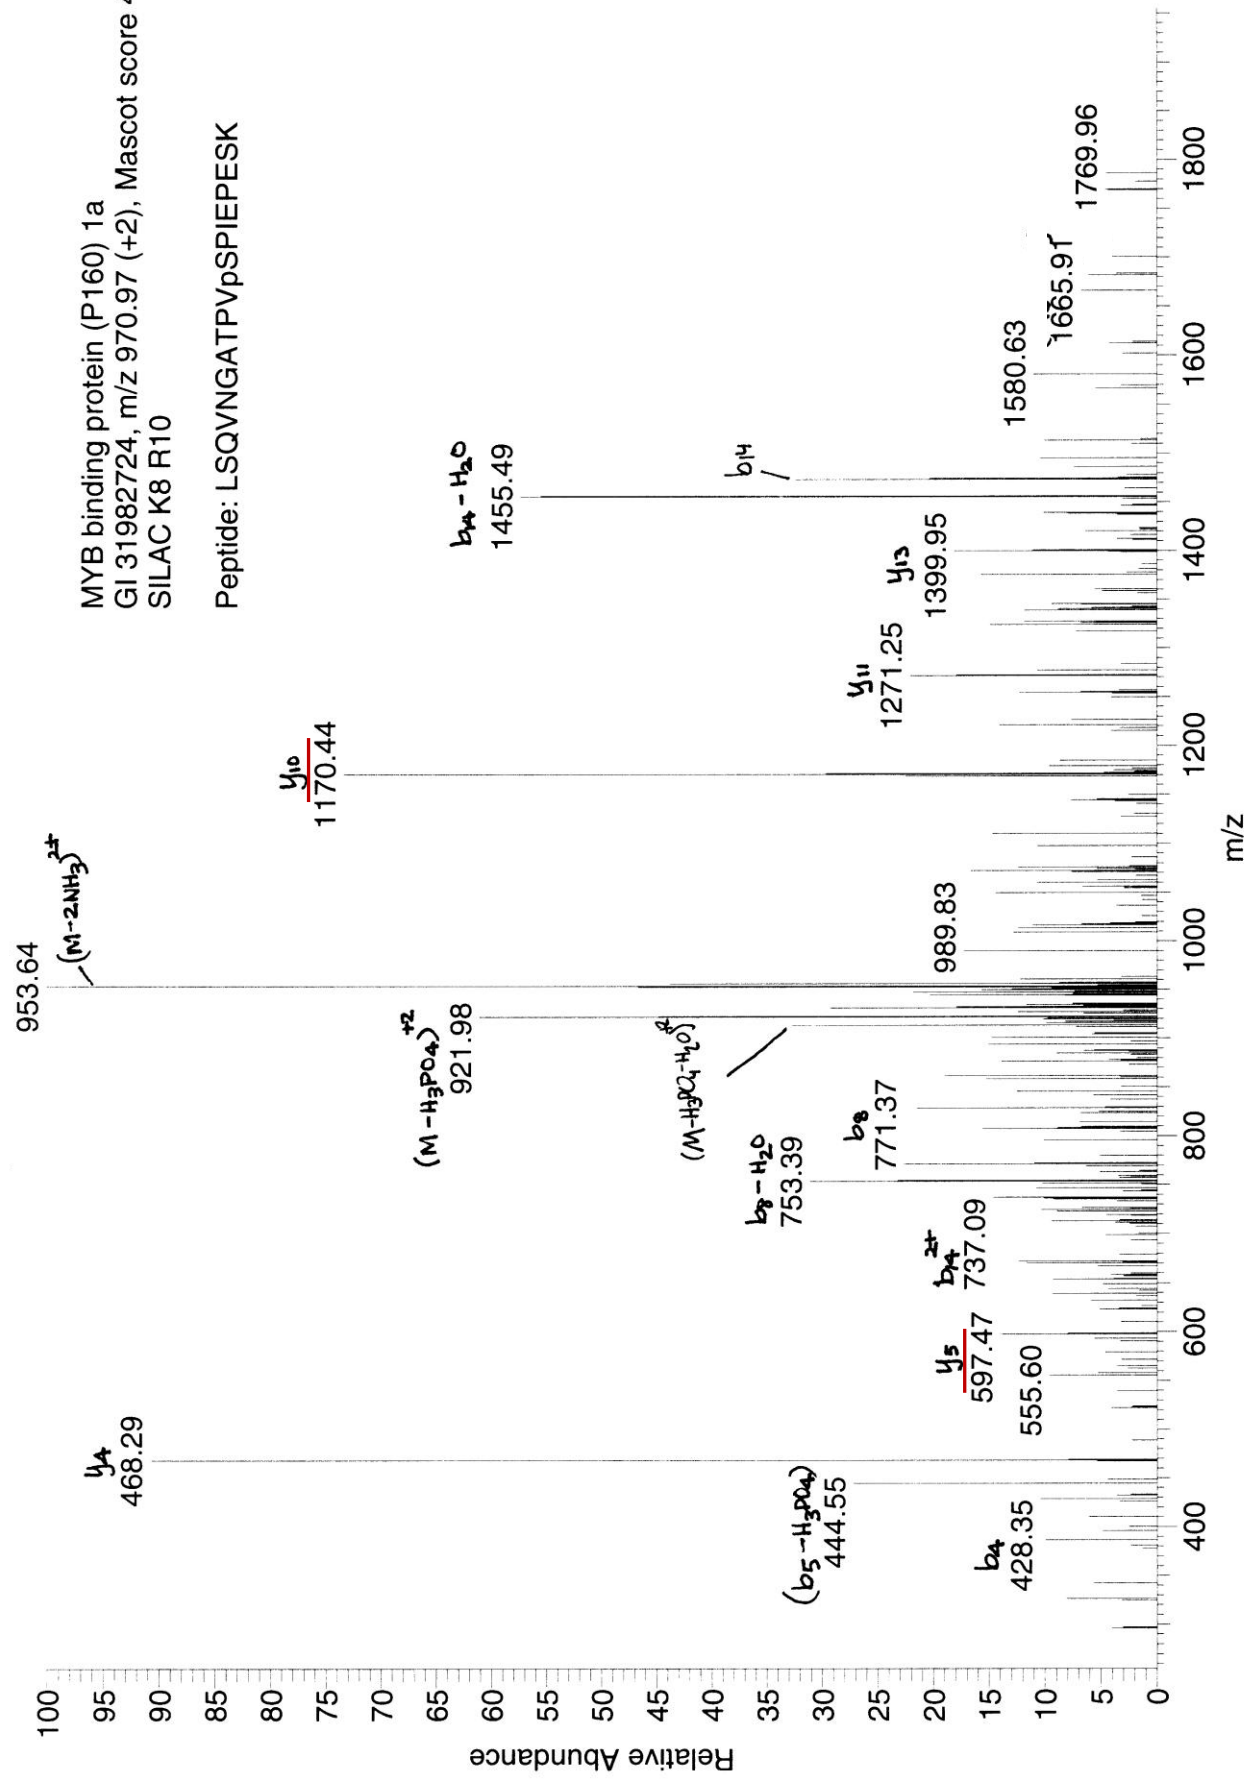

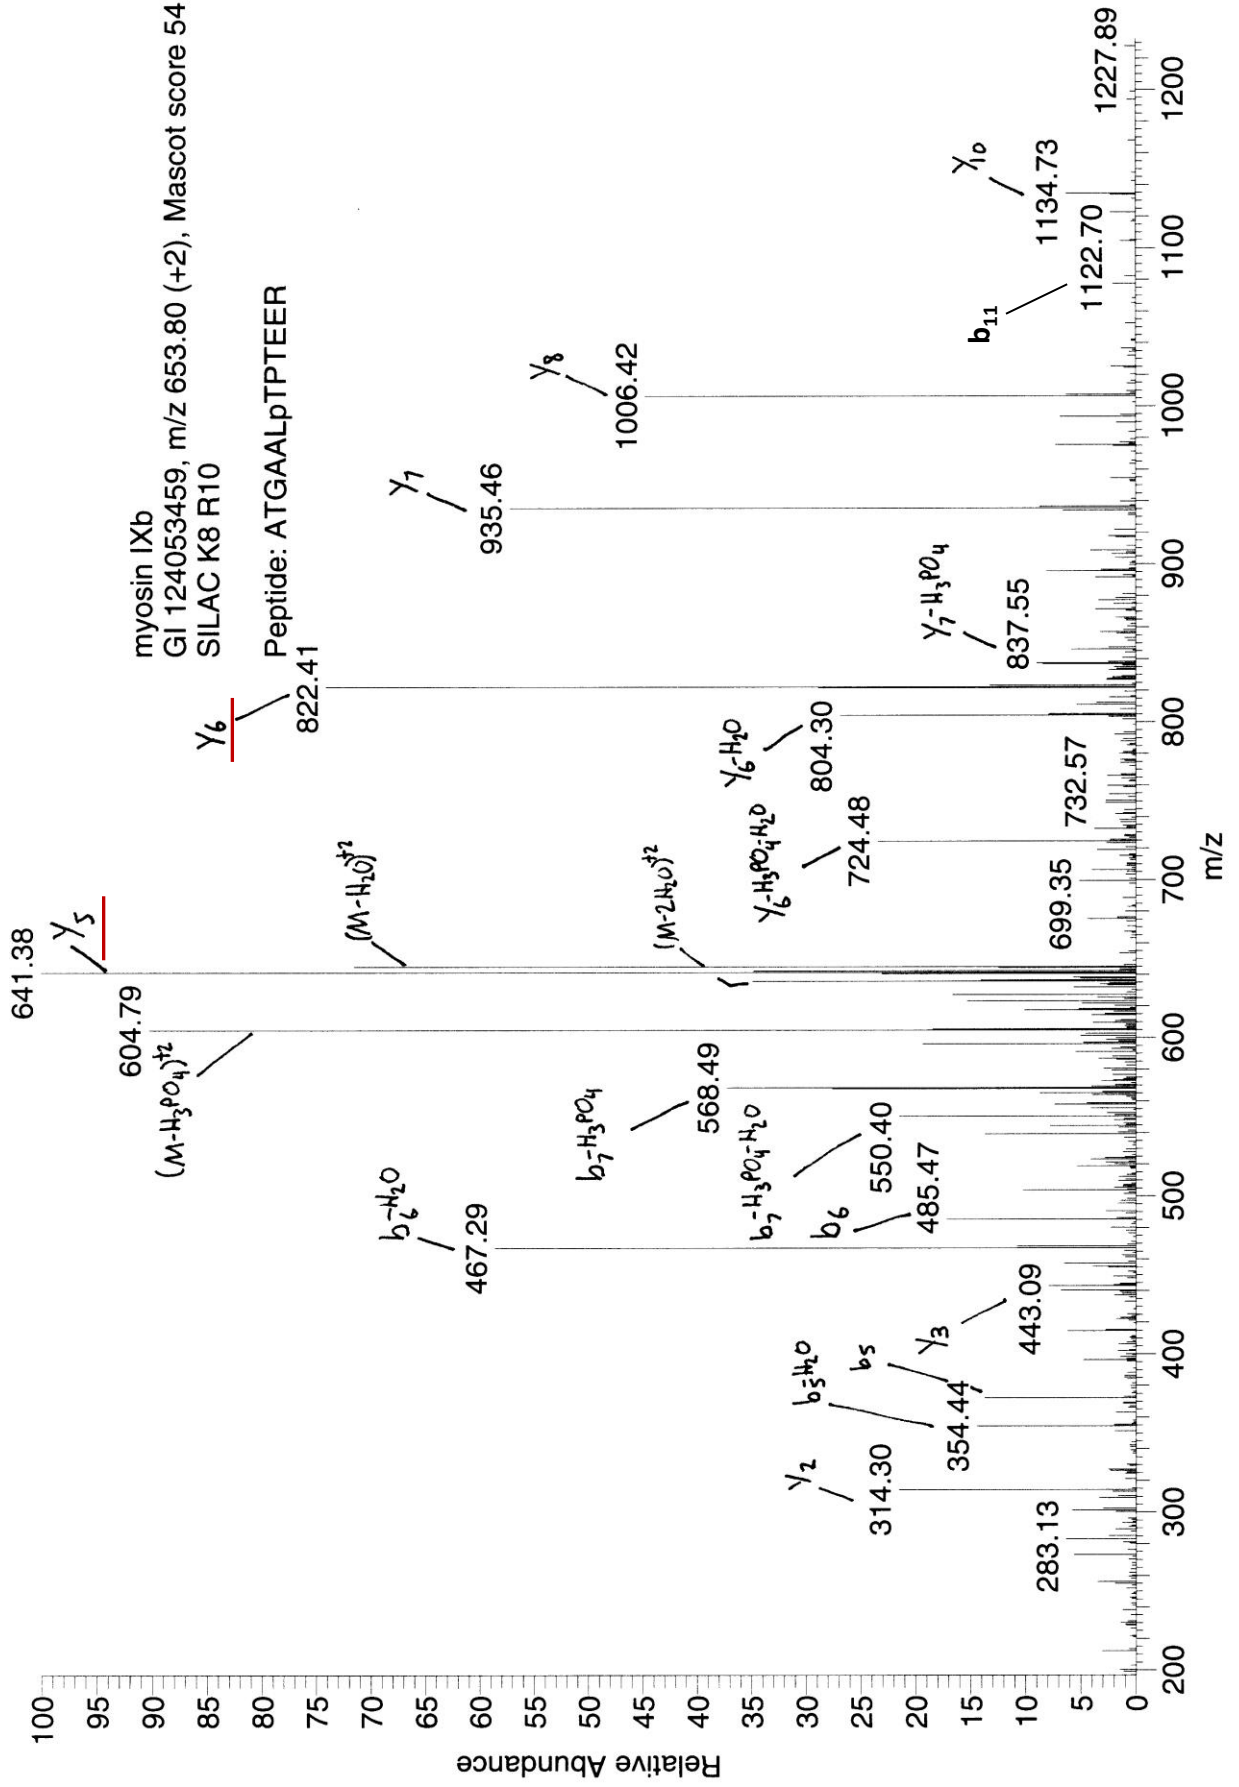







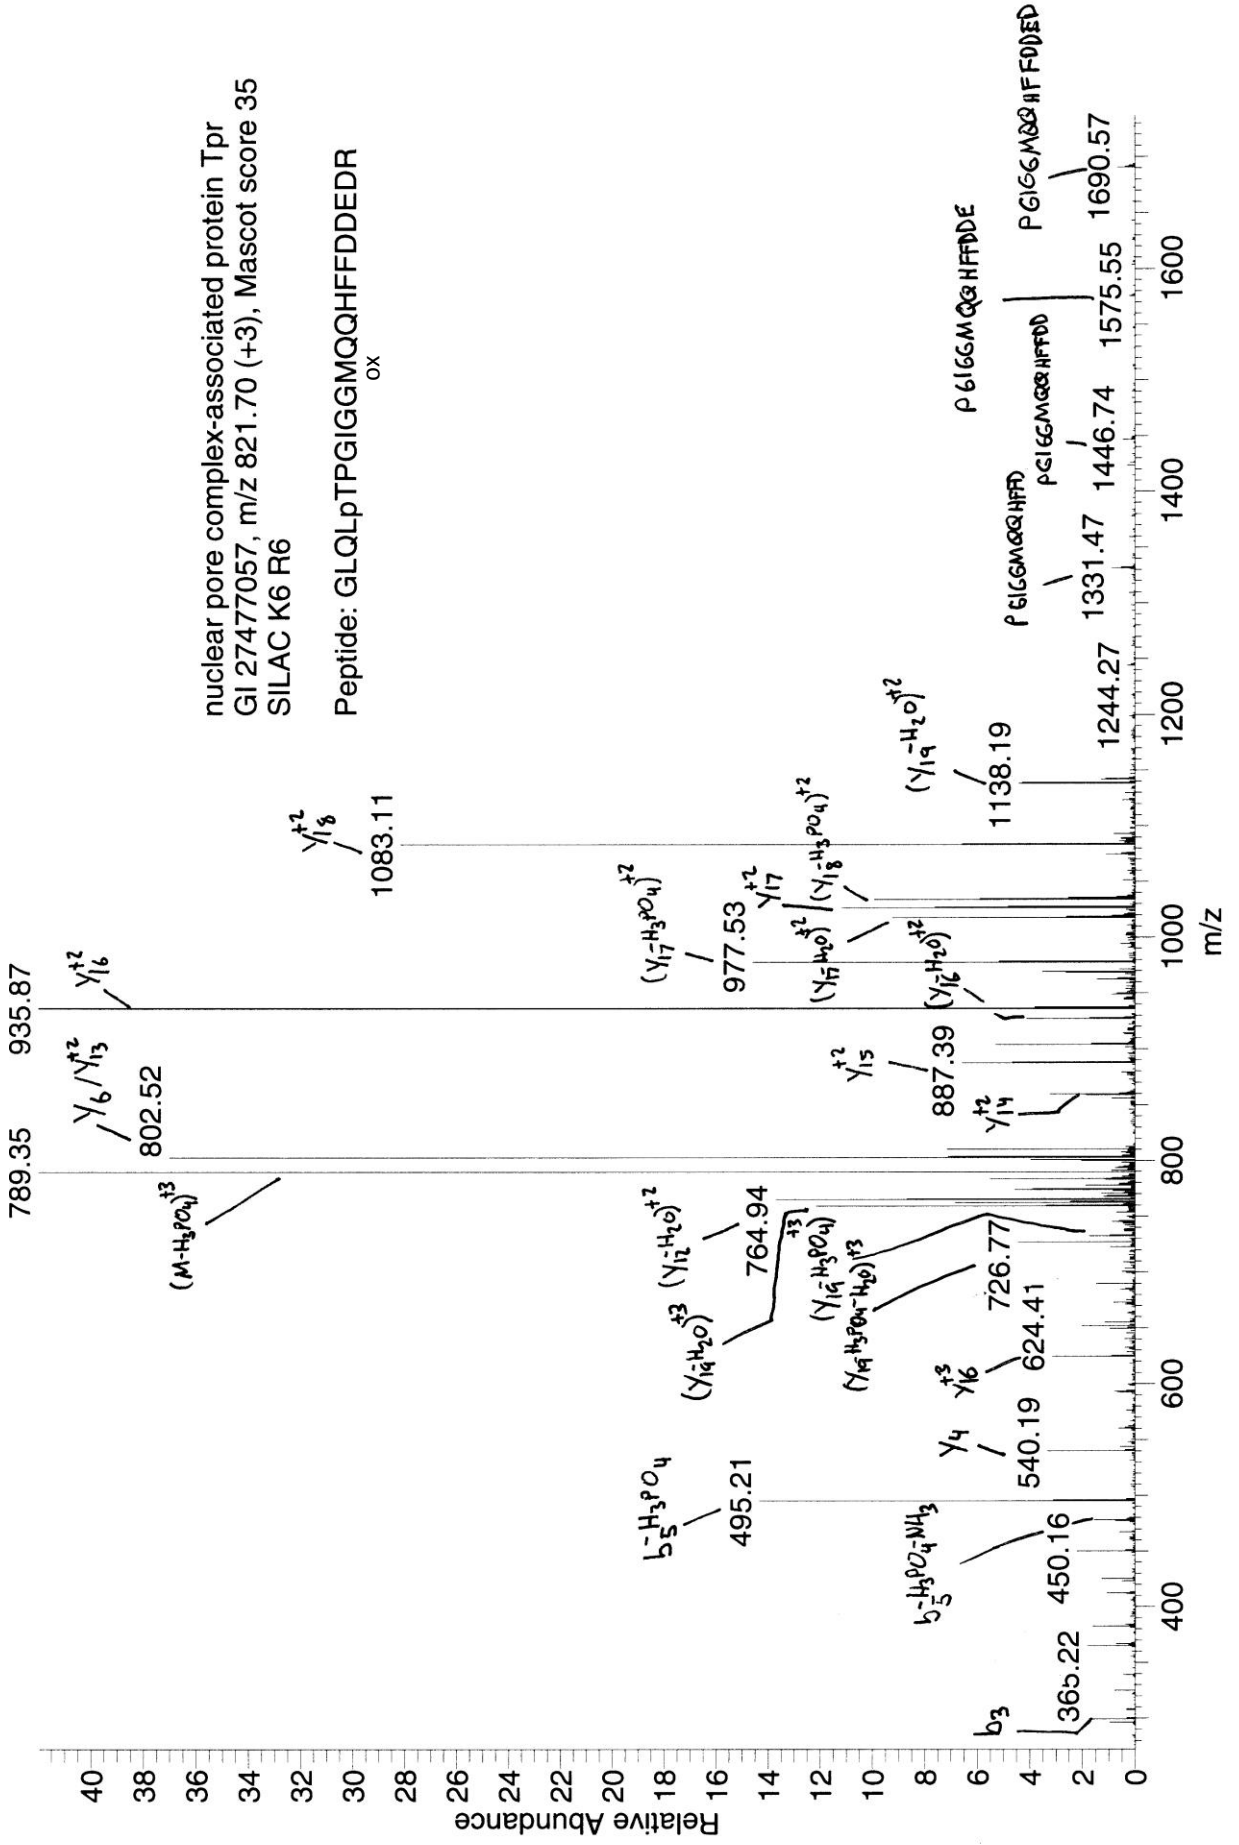

nuclear pore complex-associated protein Tpr  
 GI 27477057, m/z 821.70 (+3), Mascot score 35  
 SILAC K6 R6

Peptide: GLQLpTPGIGGMQQHFFDDED<sub>ox</sub>

nuclear pore complex-associated protein Tpr  
 GI 27477057, m/z 647.97 (+3), Mascot score 47  
**SILAC K8 R10**  
 Peptide: TDGFAEAIHpSPQVAGVPR

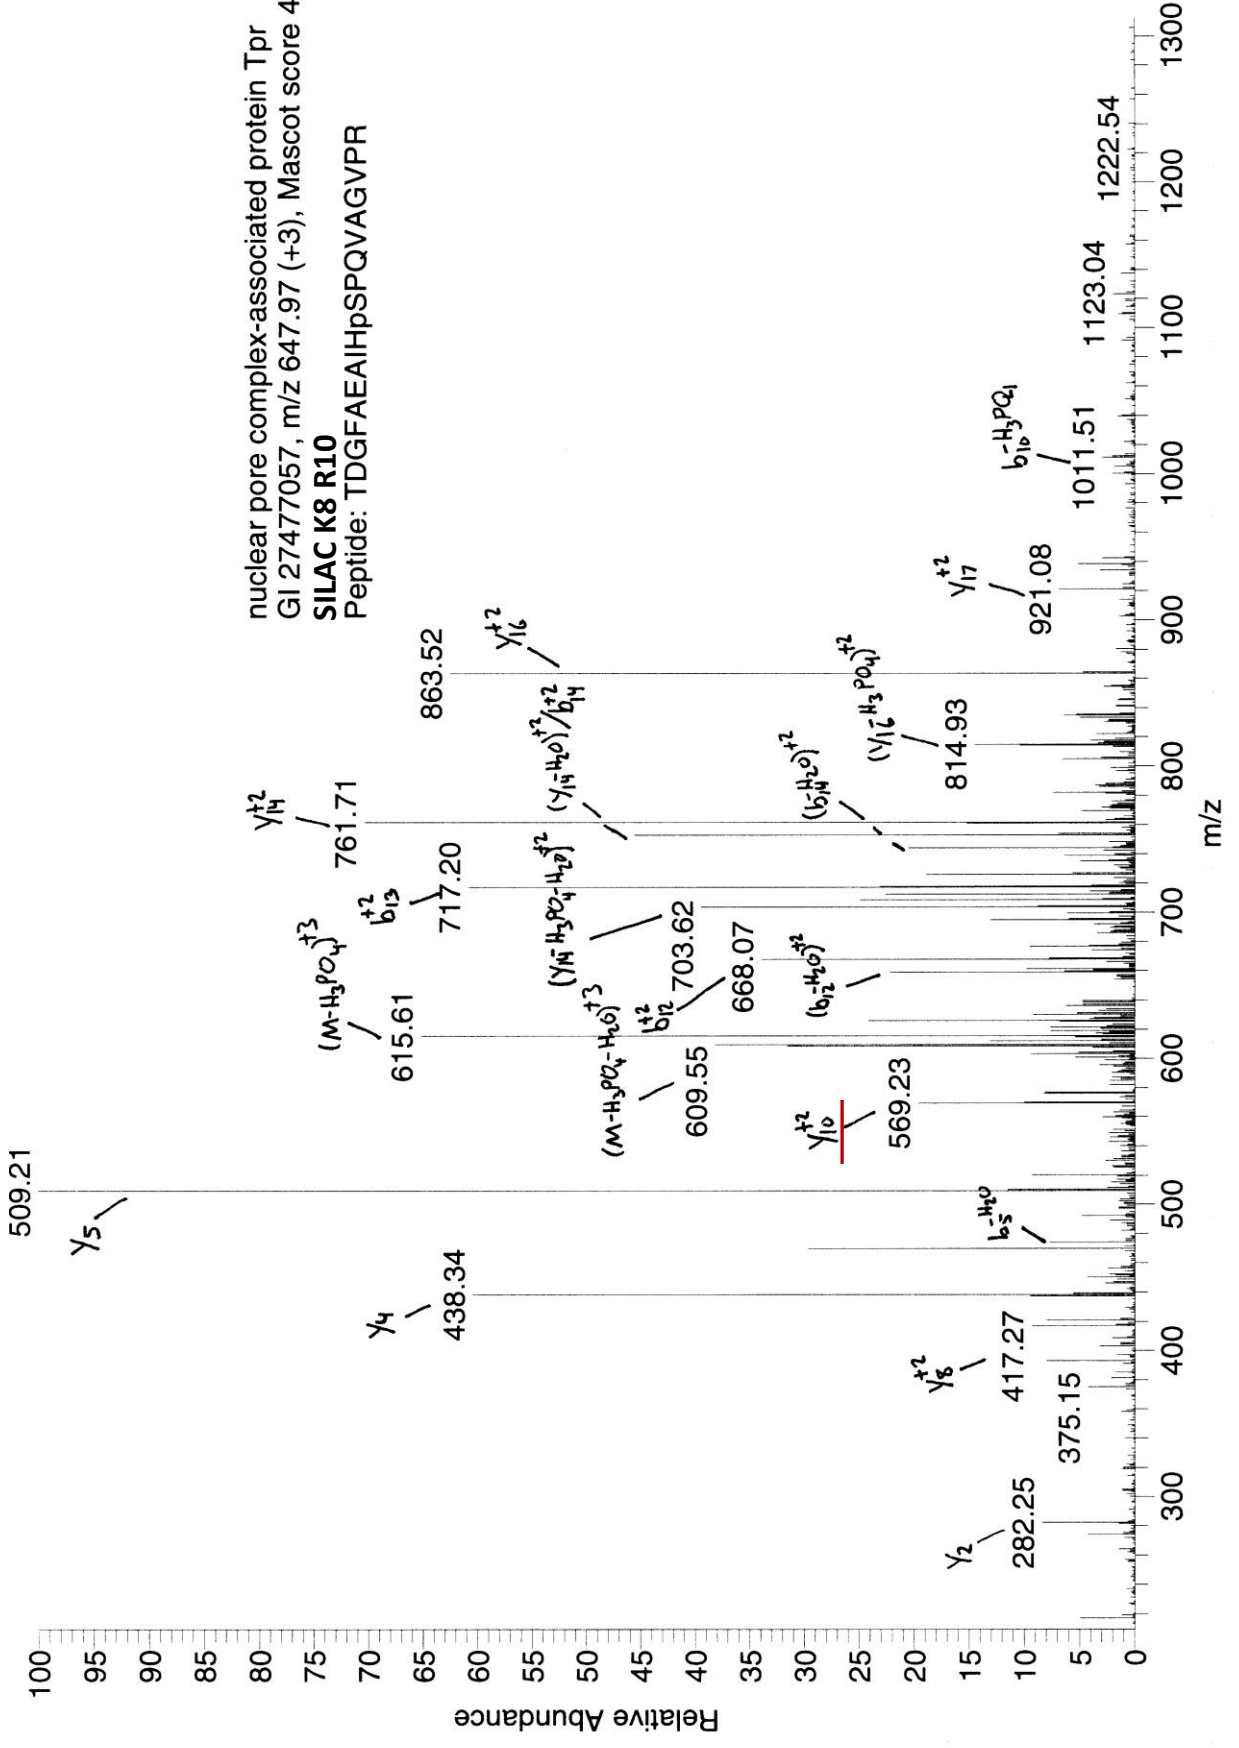

nuclear pore complex-associated protein Tpr  
 GI 27477057, m/z 747.39 (+2), Mascot score 50  
 SILAC K8 R10

Peptide: TVPSPtPTLVVPHR

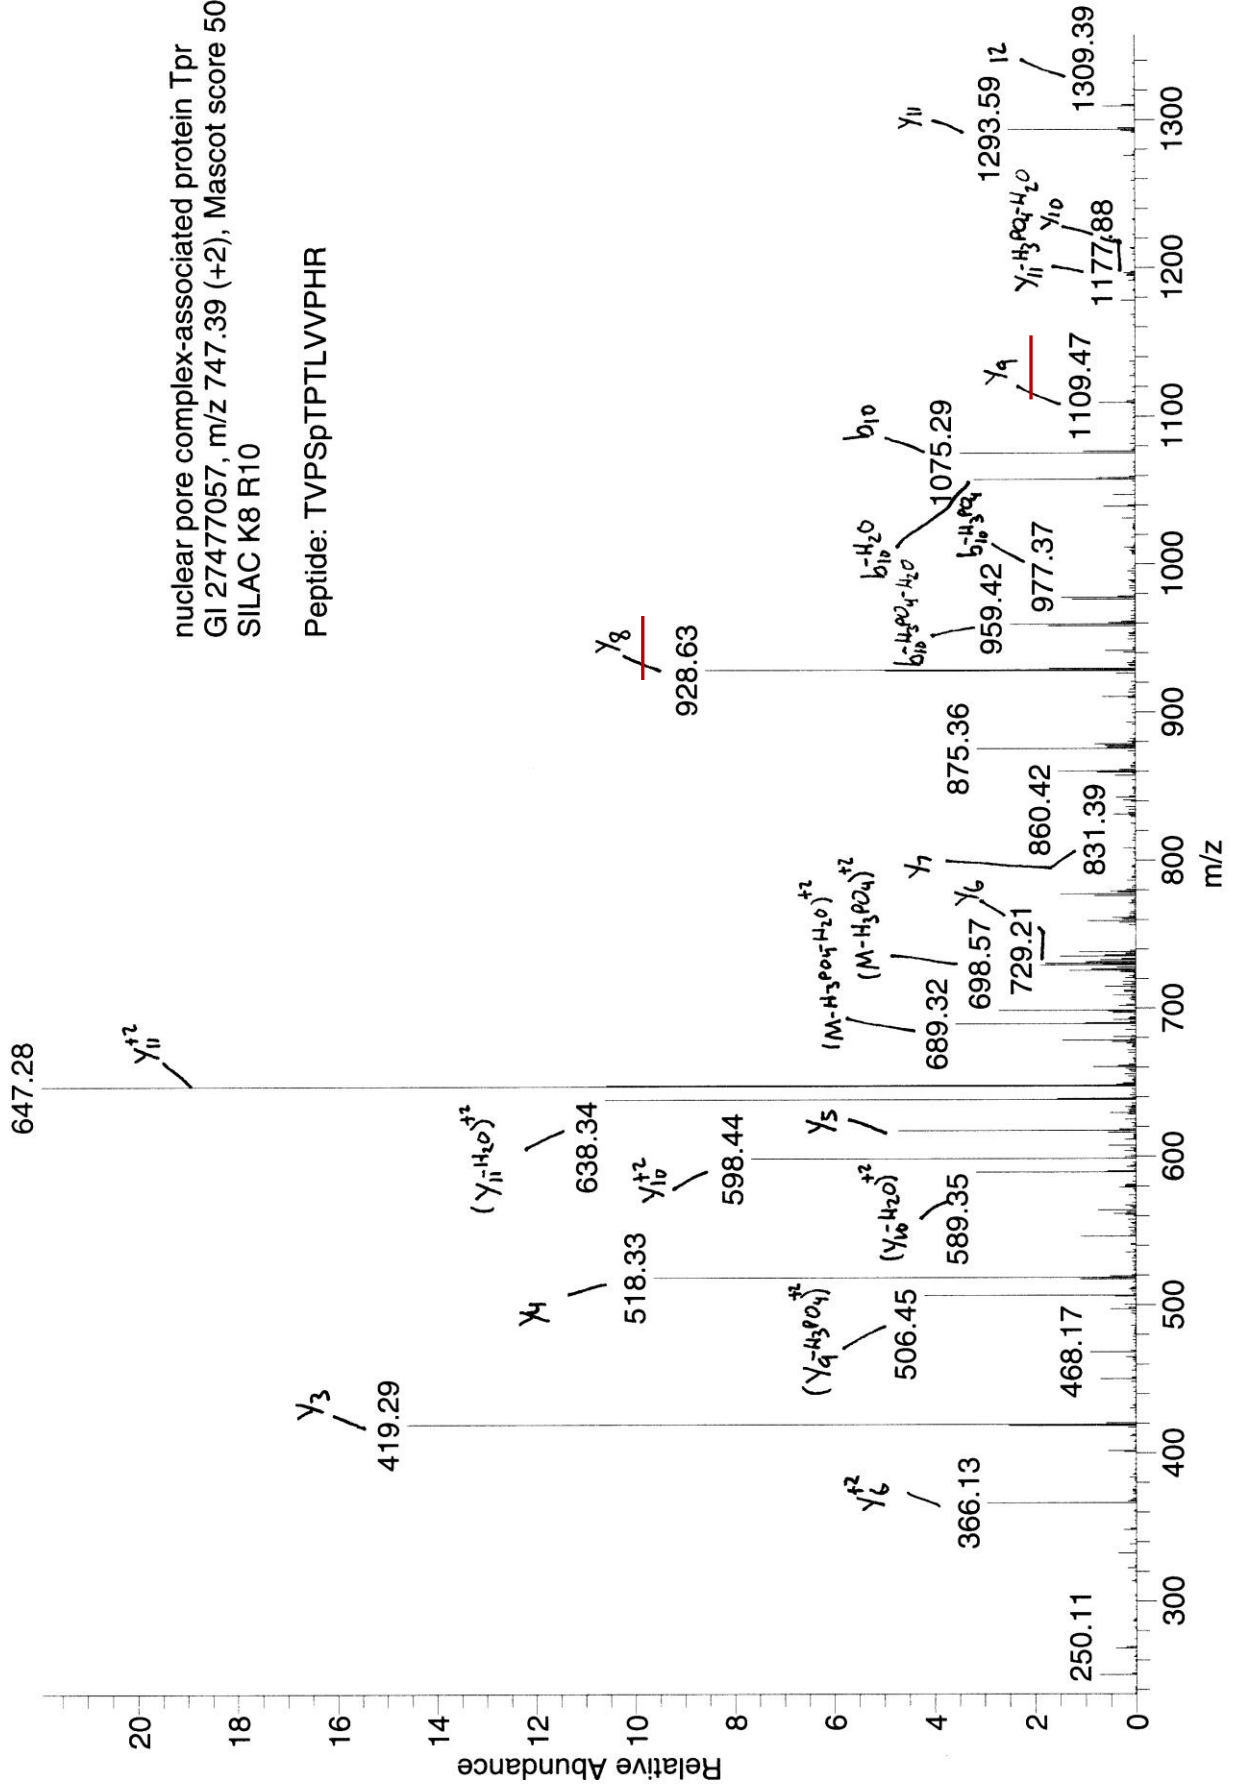

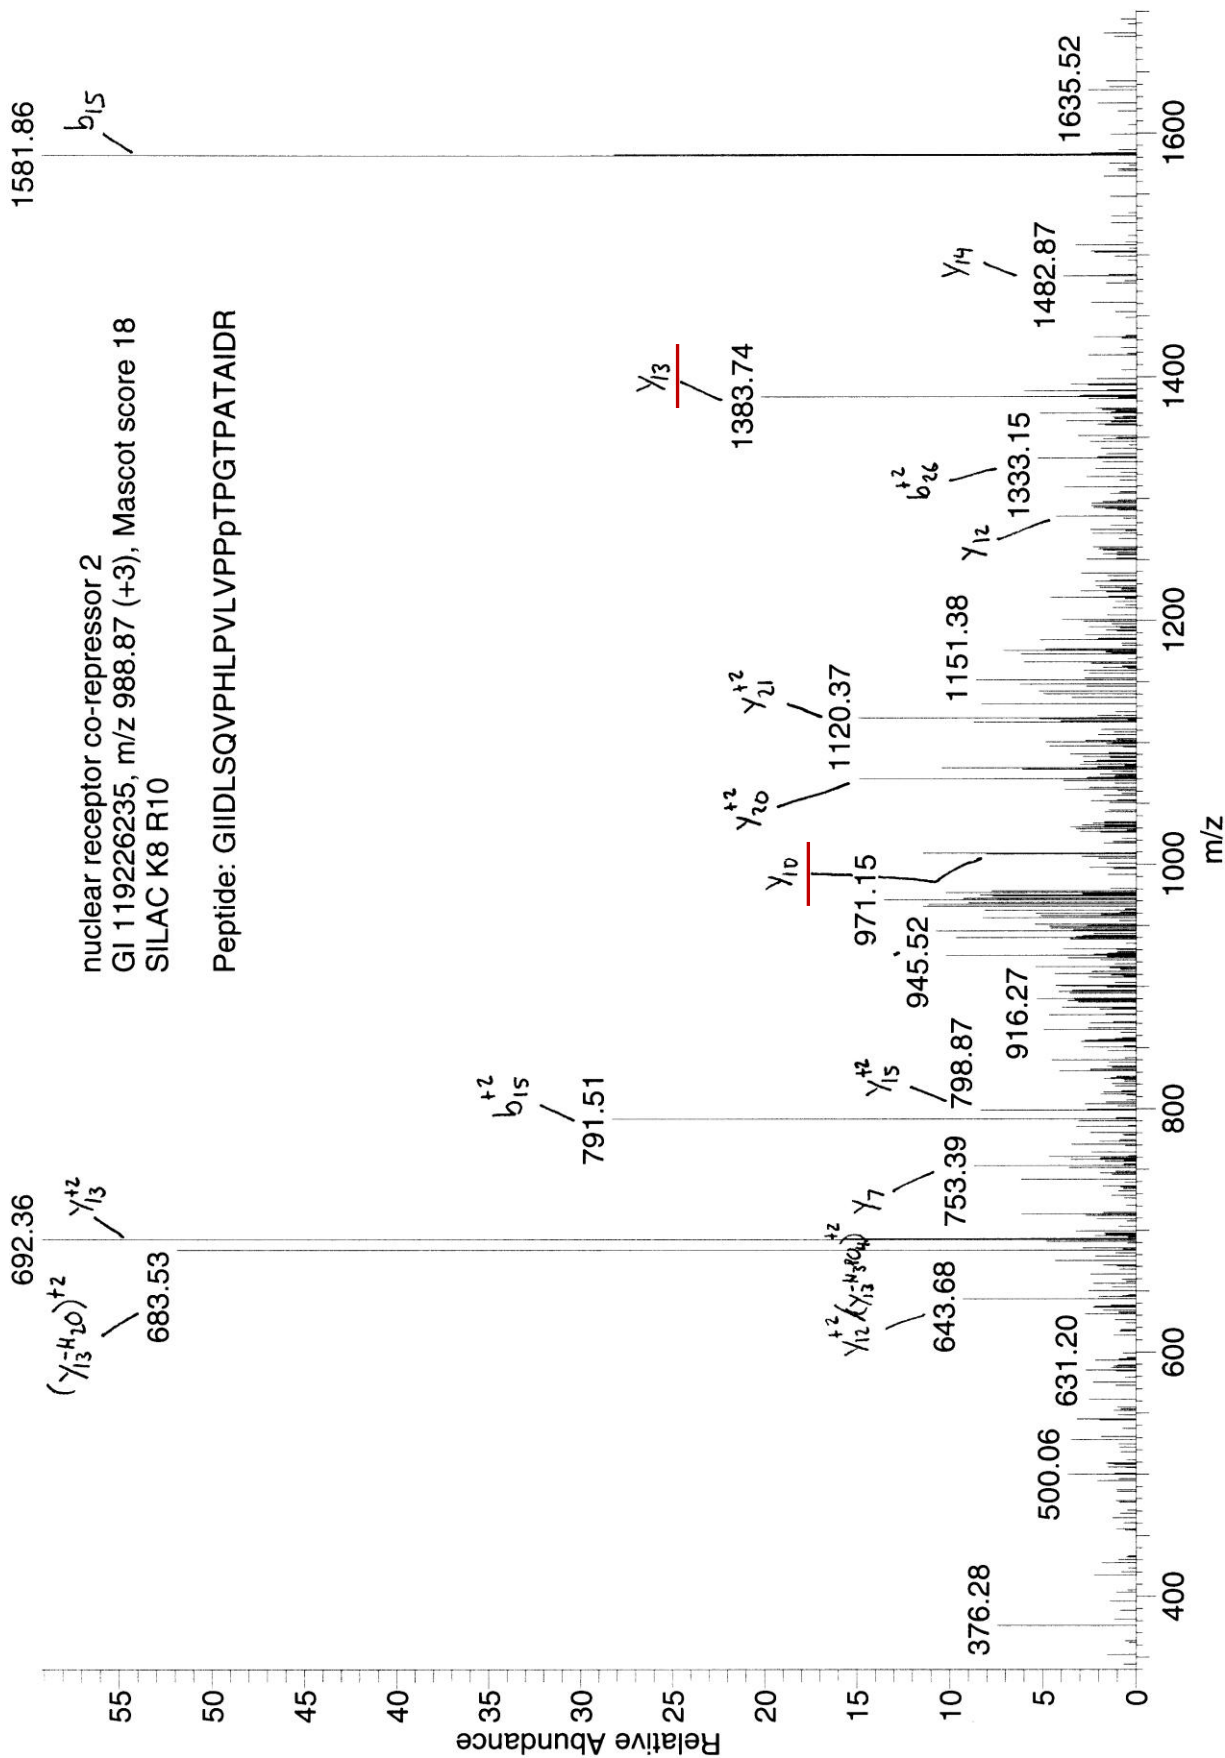

nucleoporin 153  
 GI 30519891, m/z 618.99 (+3), Mascot score 31  
 SILAC K8 R10

Peptide: EGSVLDILKpTPGFASPK

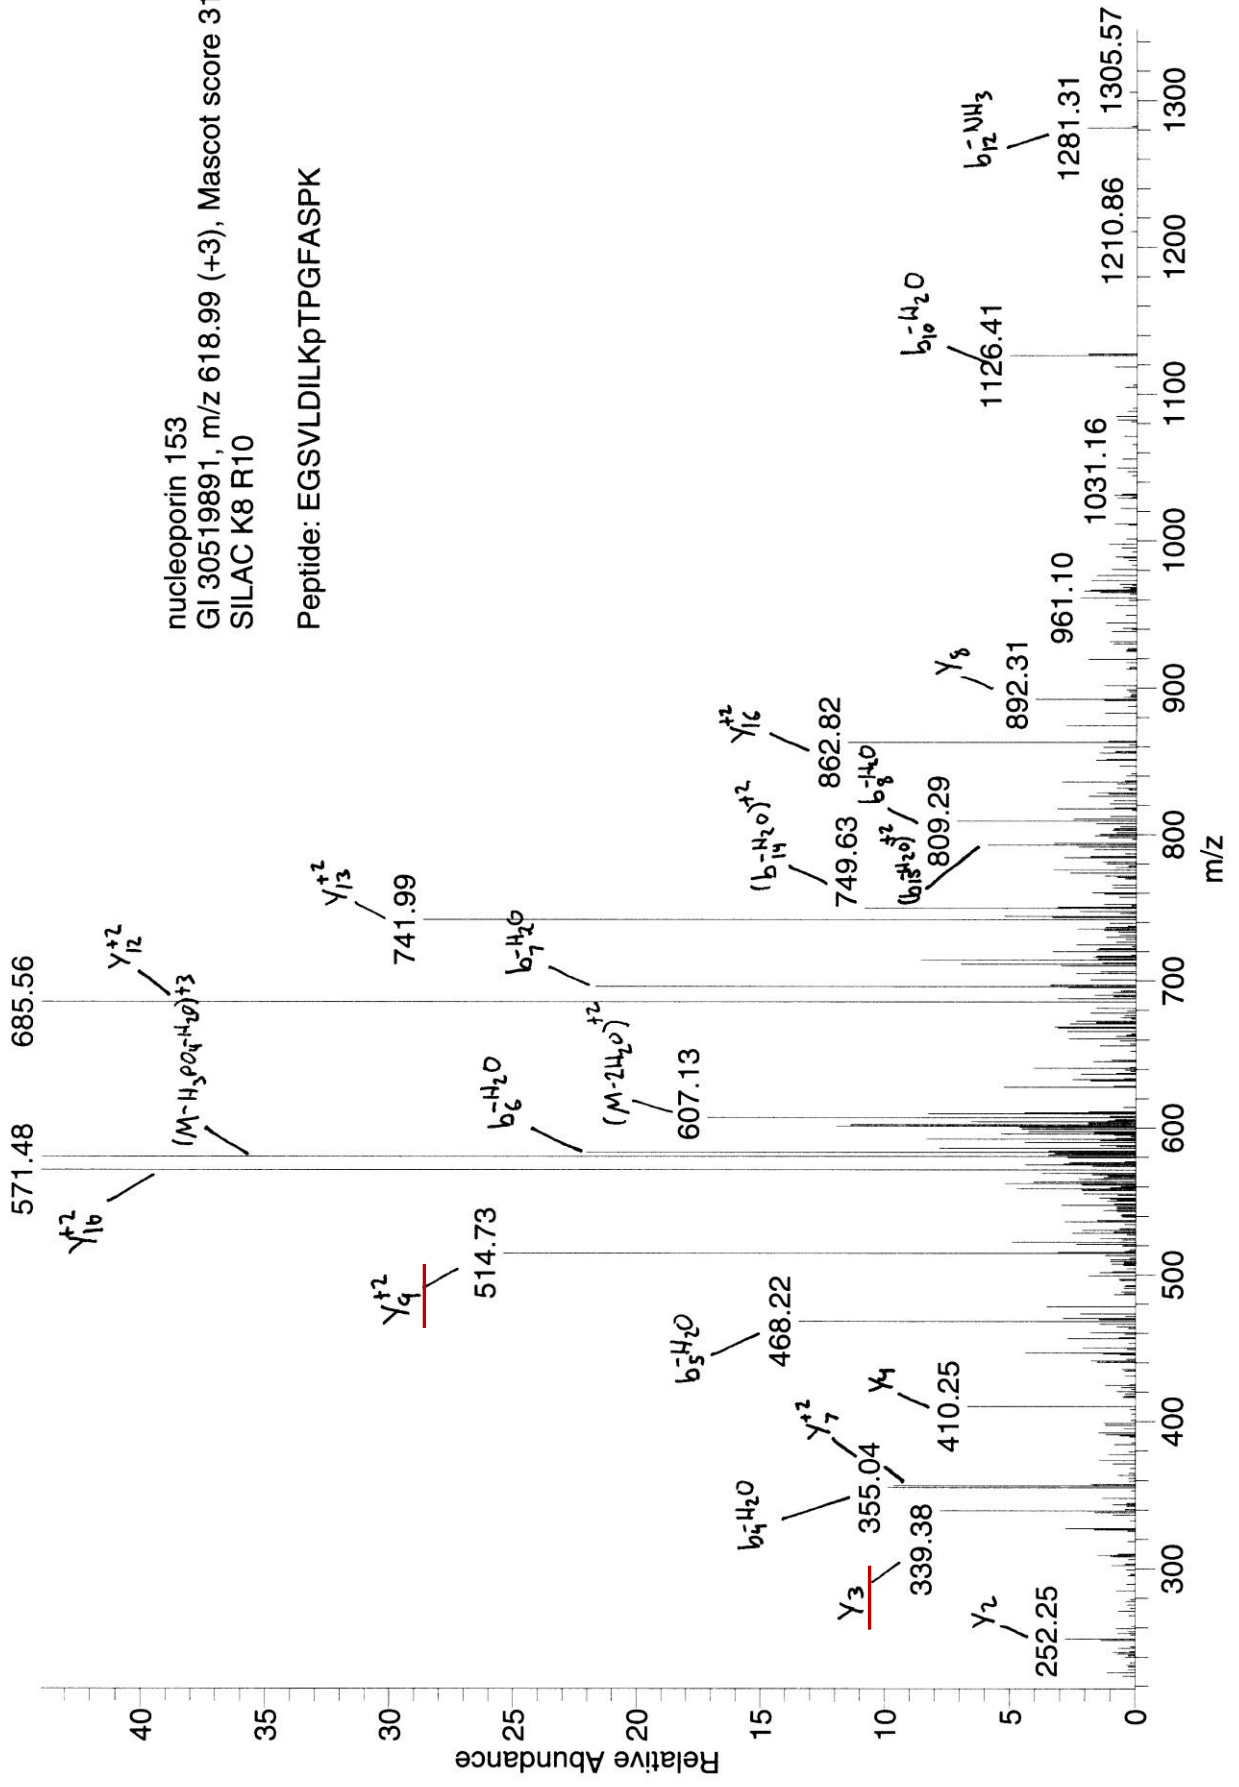

PHD finger protein 2  
GI 31543476, m/z 653.00 (+3), Mascot score 35  
SILAC K8 R10

Peptide: ALRPPSpSPGVFGALQSFK

Fragmentation does not distinguish phosphorylation at positions 6 and 7. Assignment is based on position of proline.

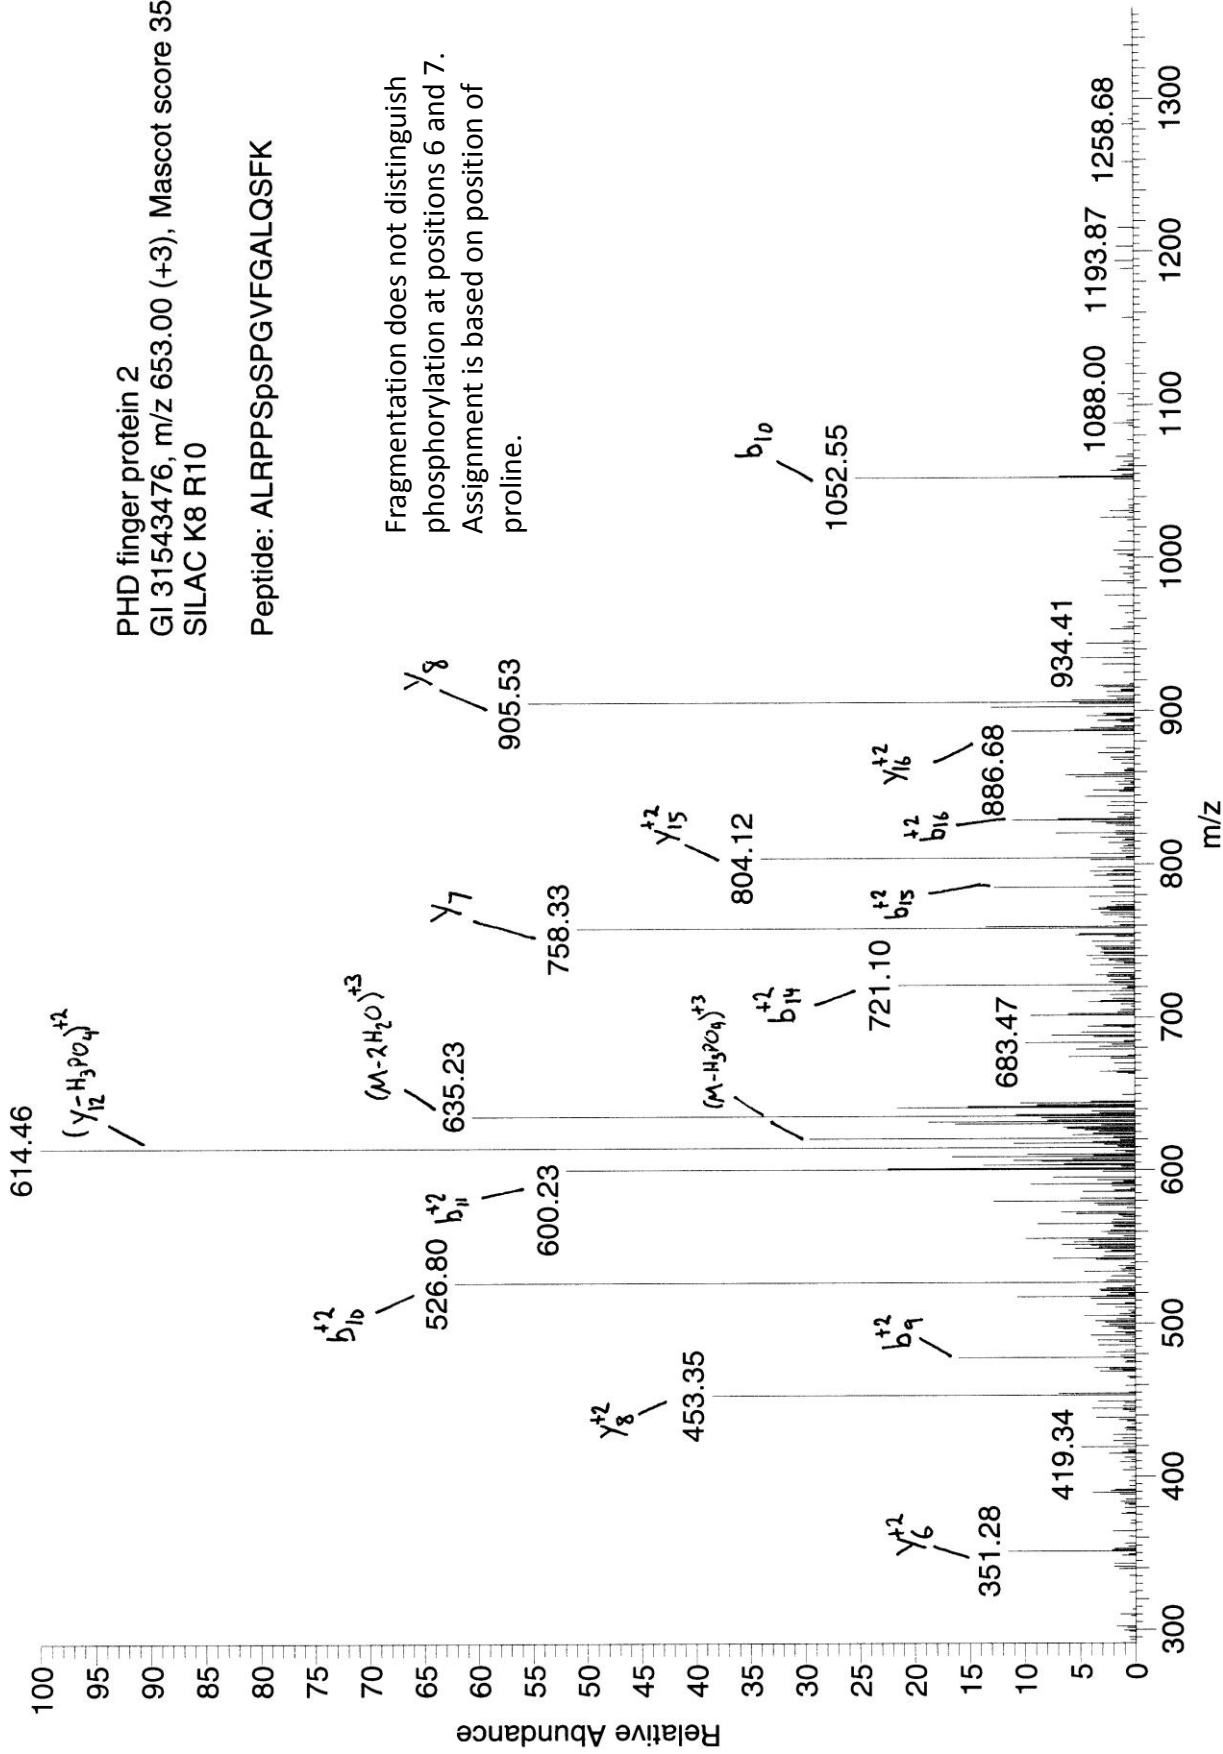

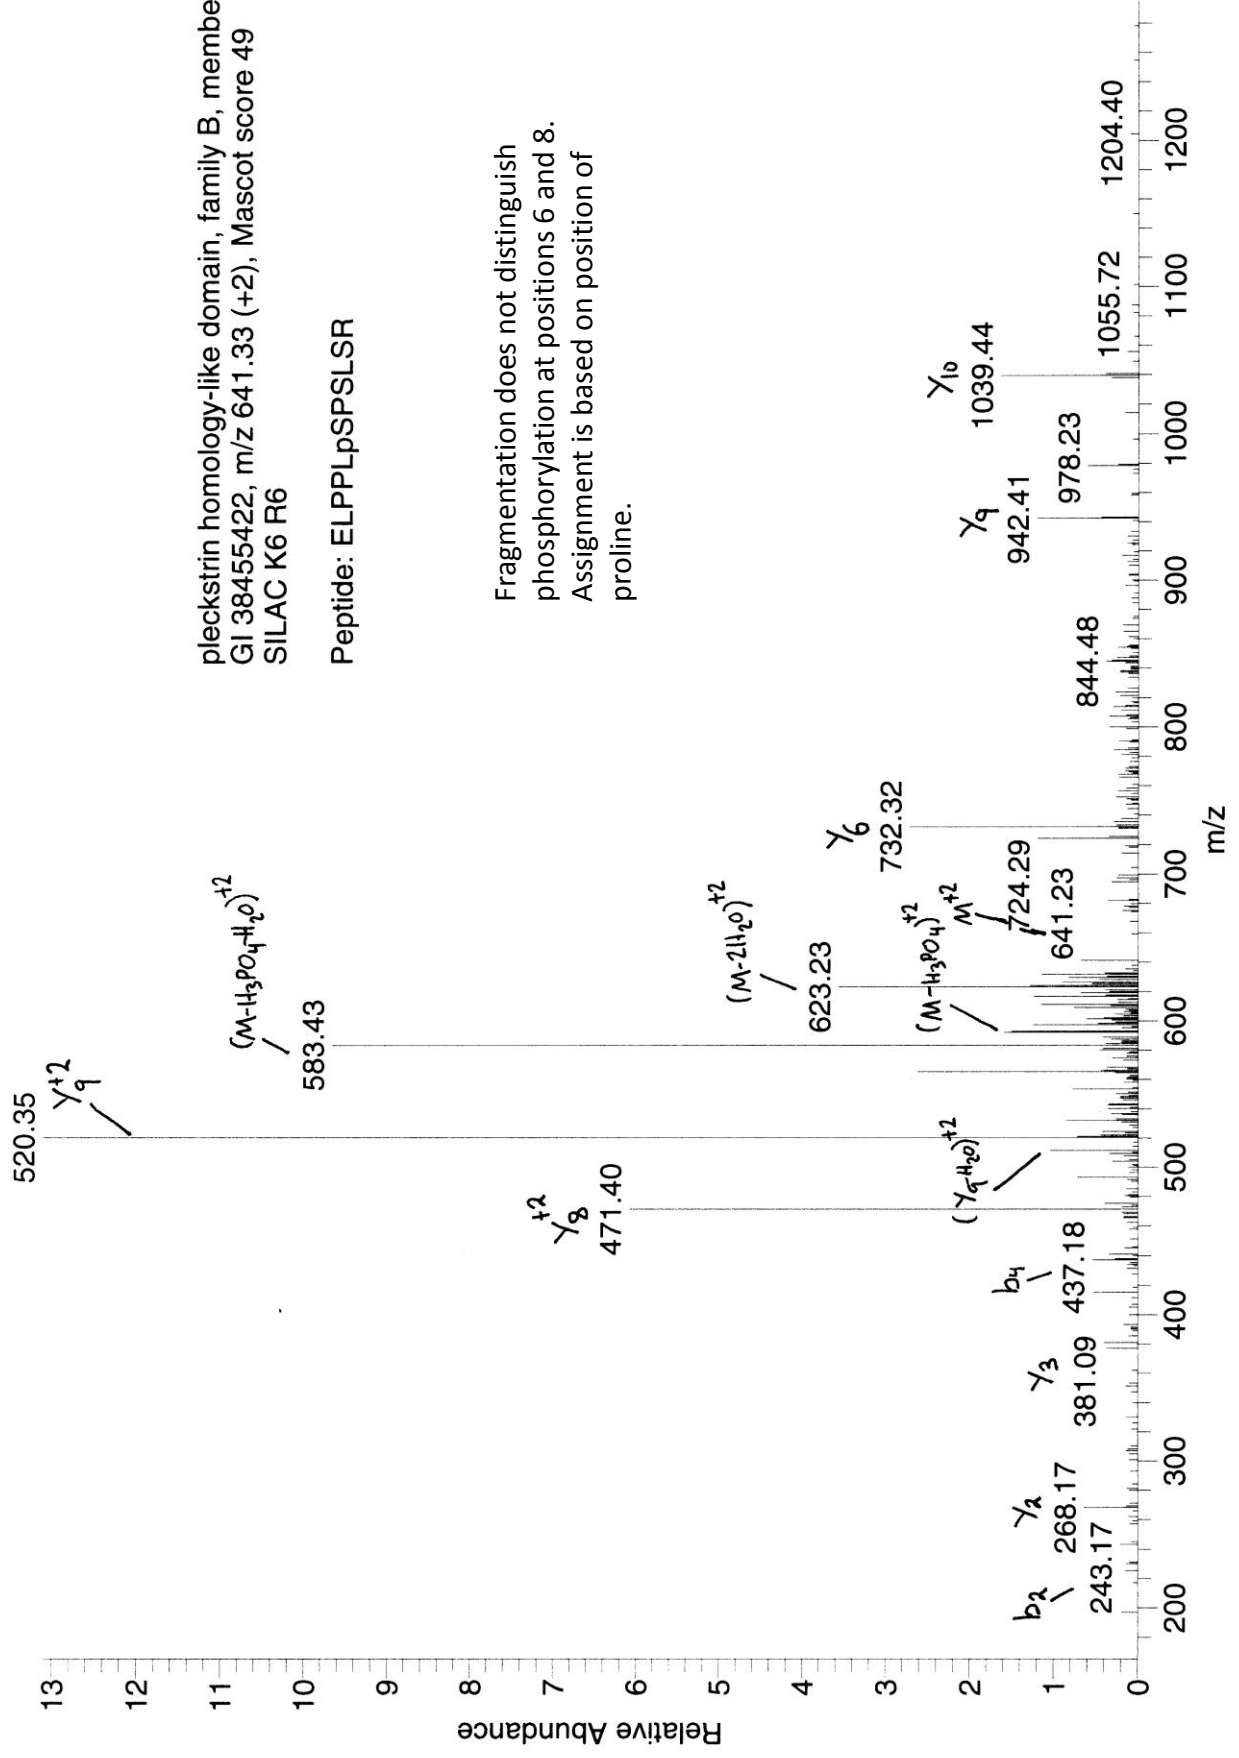

pleckstrin homology-like domain, family B, member 1  
 GI 38455422, m/z 641.33 (+2), Mascot score 49  
 SILAC K6 R6

Peptide: ELPPLpSPSLSR

Fragmentation does not distinguish  
 phosphorylation at positions 6 and 8.  
 Assignment is based on position of  
 proline.



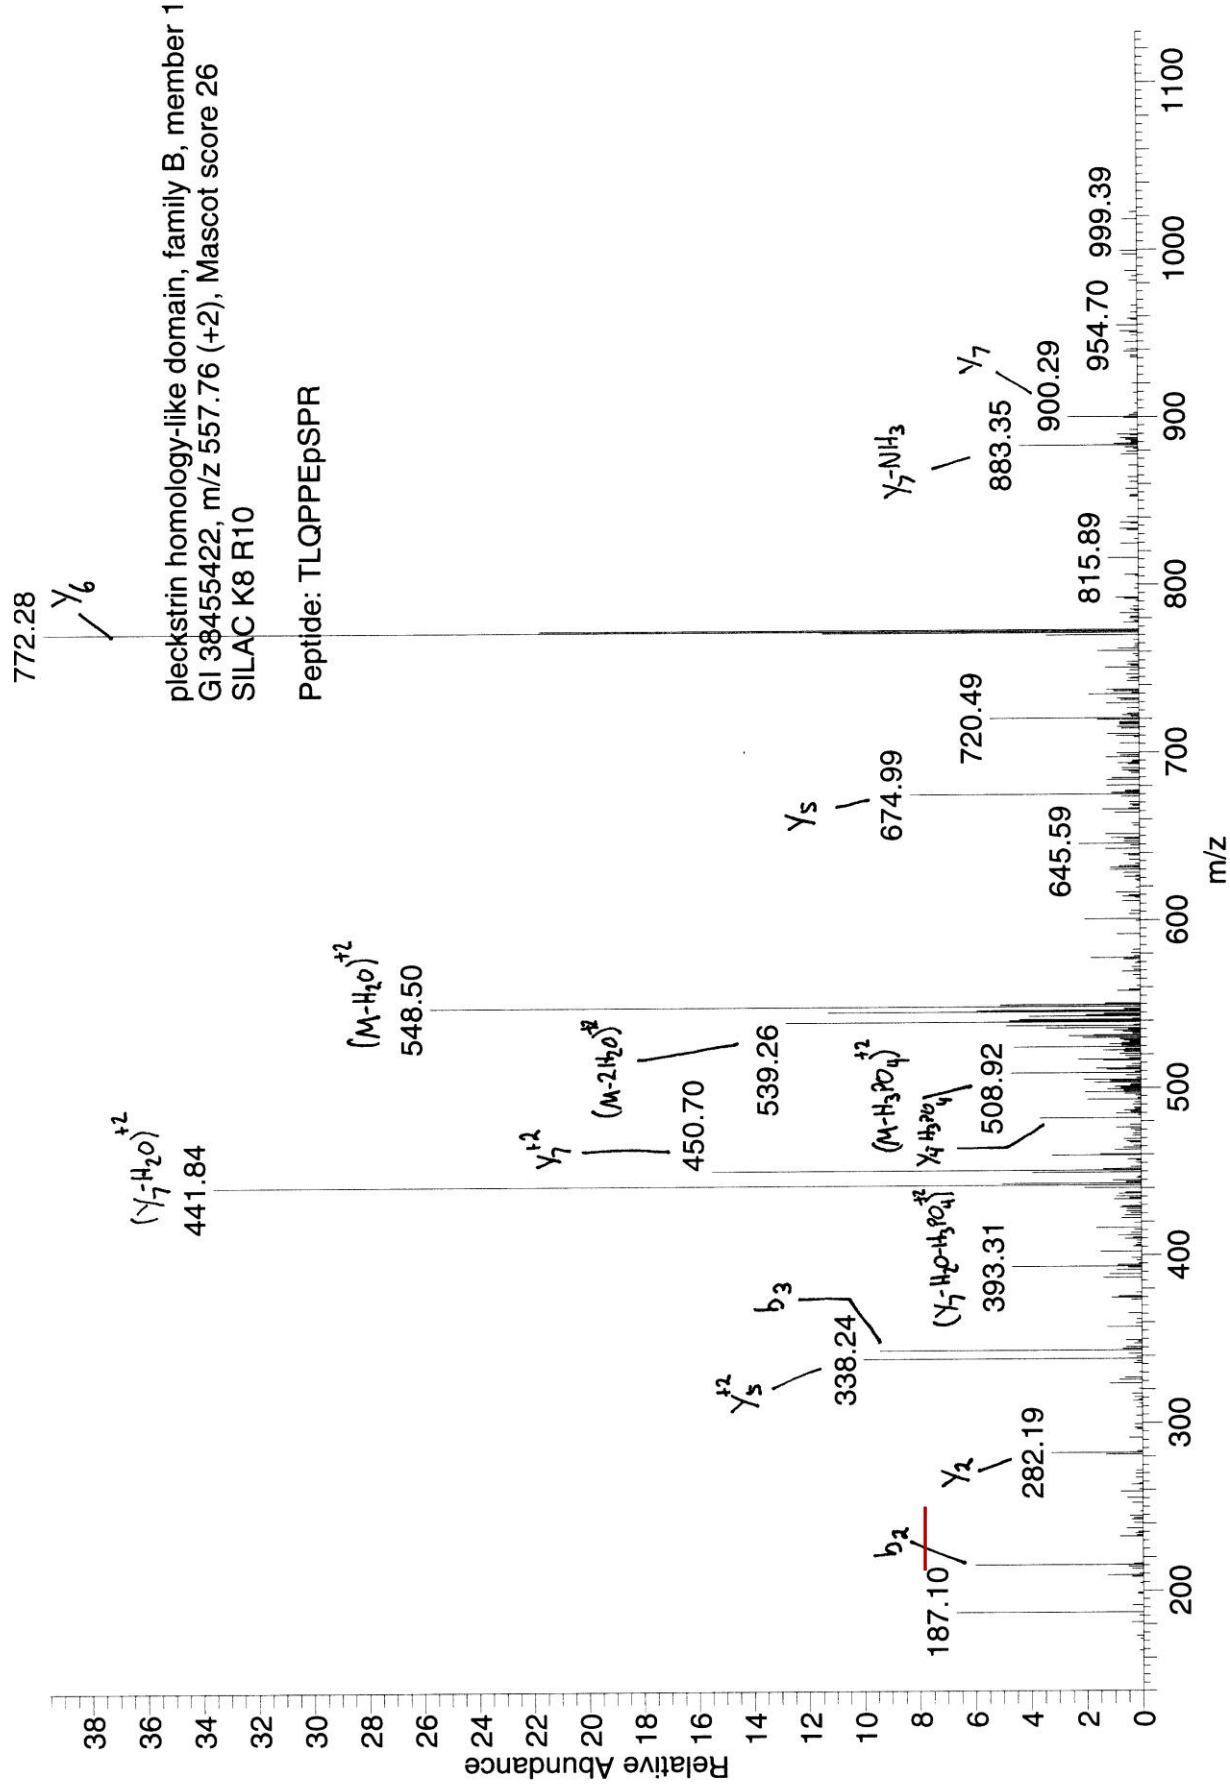

pleckstrin homology-like domain, family B, member 1  
 GI 38455422, m/z 557.76 (+2), Mascot score 26  
 SILAC K8 R10

Peptide: TLQPPEsPR

1025.43  $\gamma_9$

pyridoxal-dependent decarboxylase domain containing 1 isoform 1  
 GI 88758582, m/z 834.42 (+2), Mascot score 76  
 SILAC K8 R10

Peptide: VQGTGVTPPPpTPLGTR

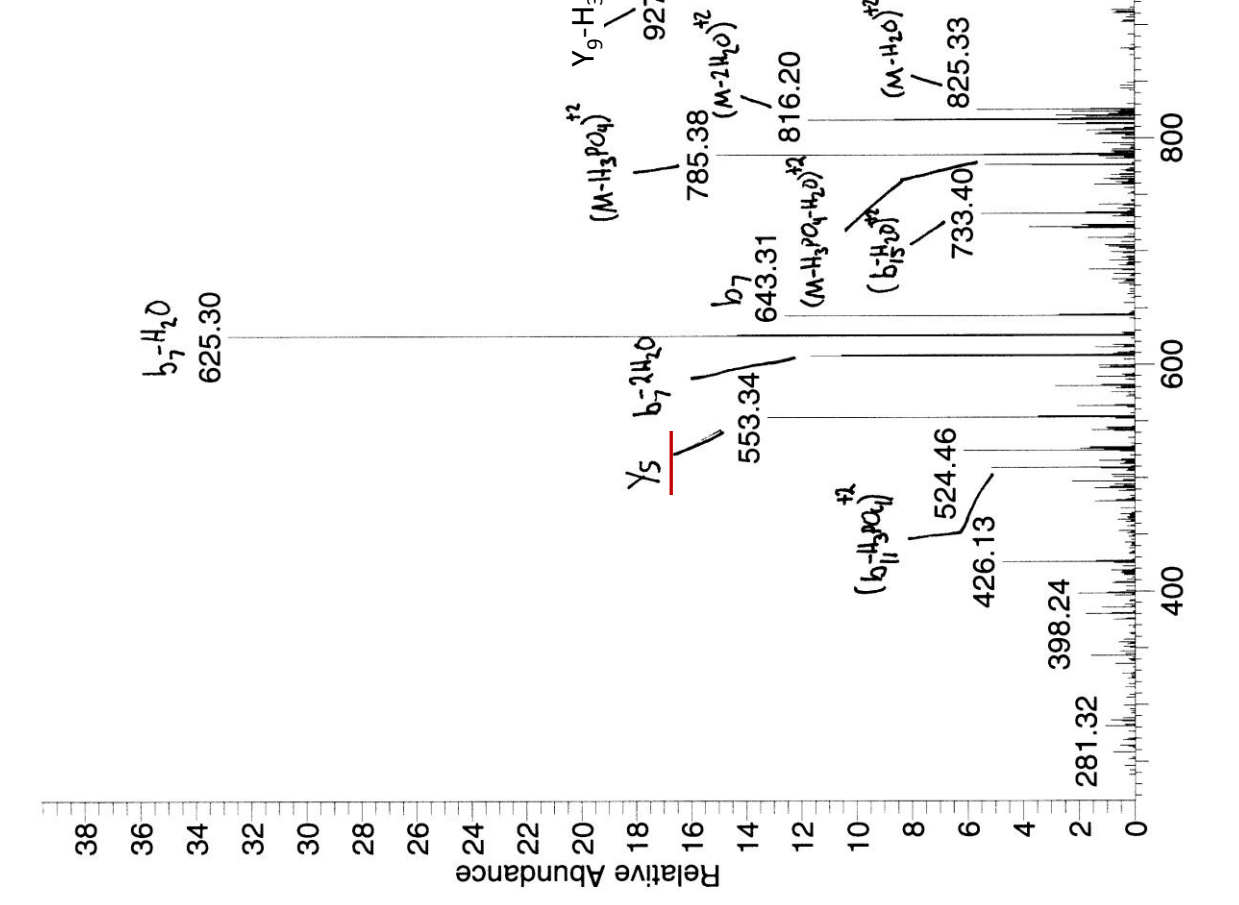

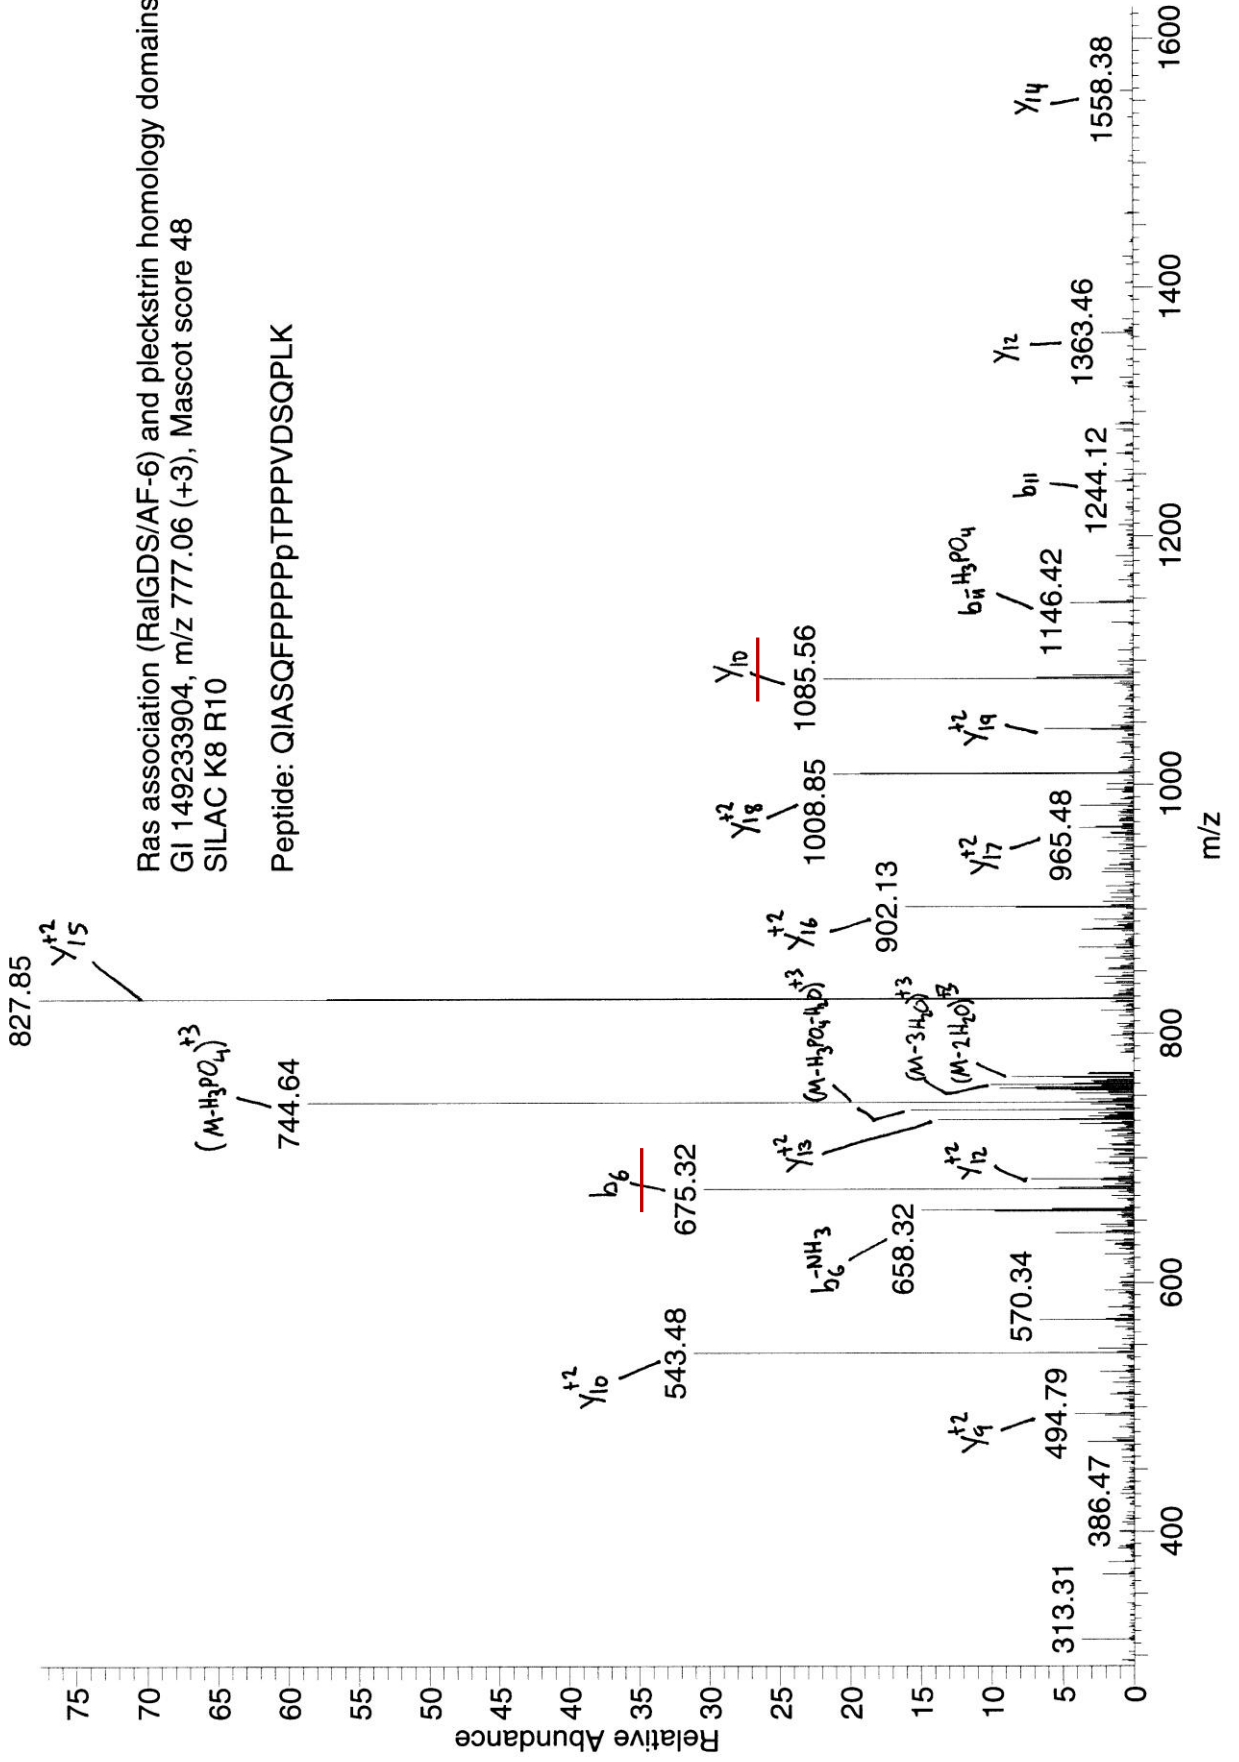

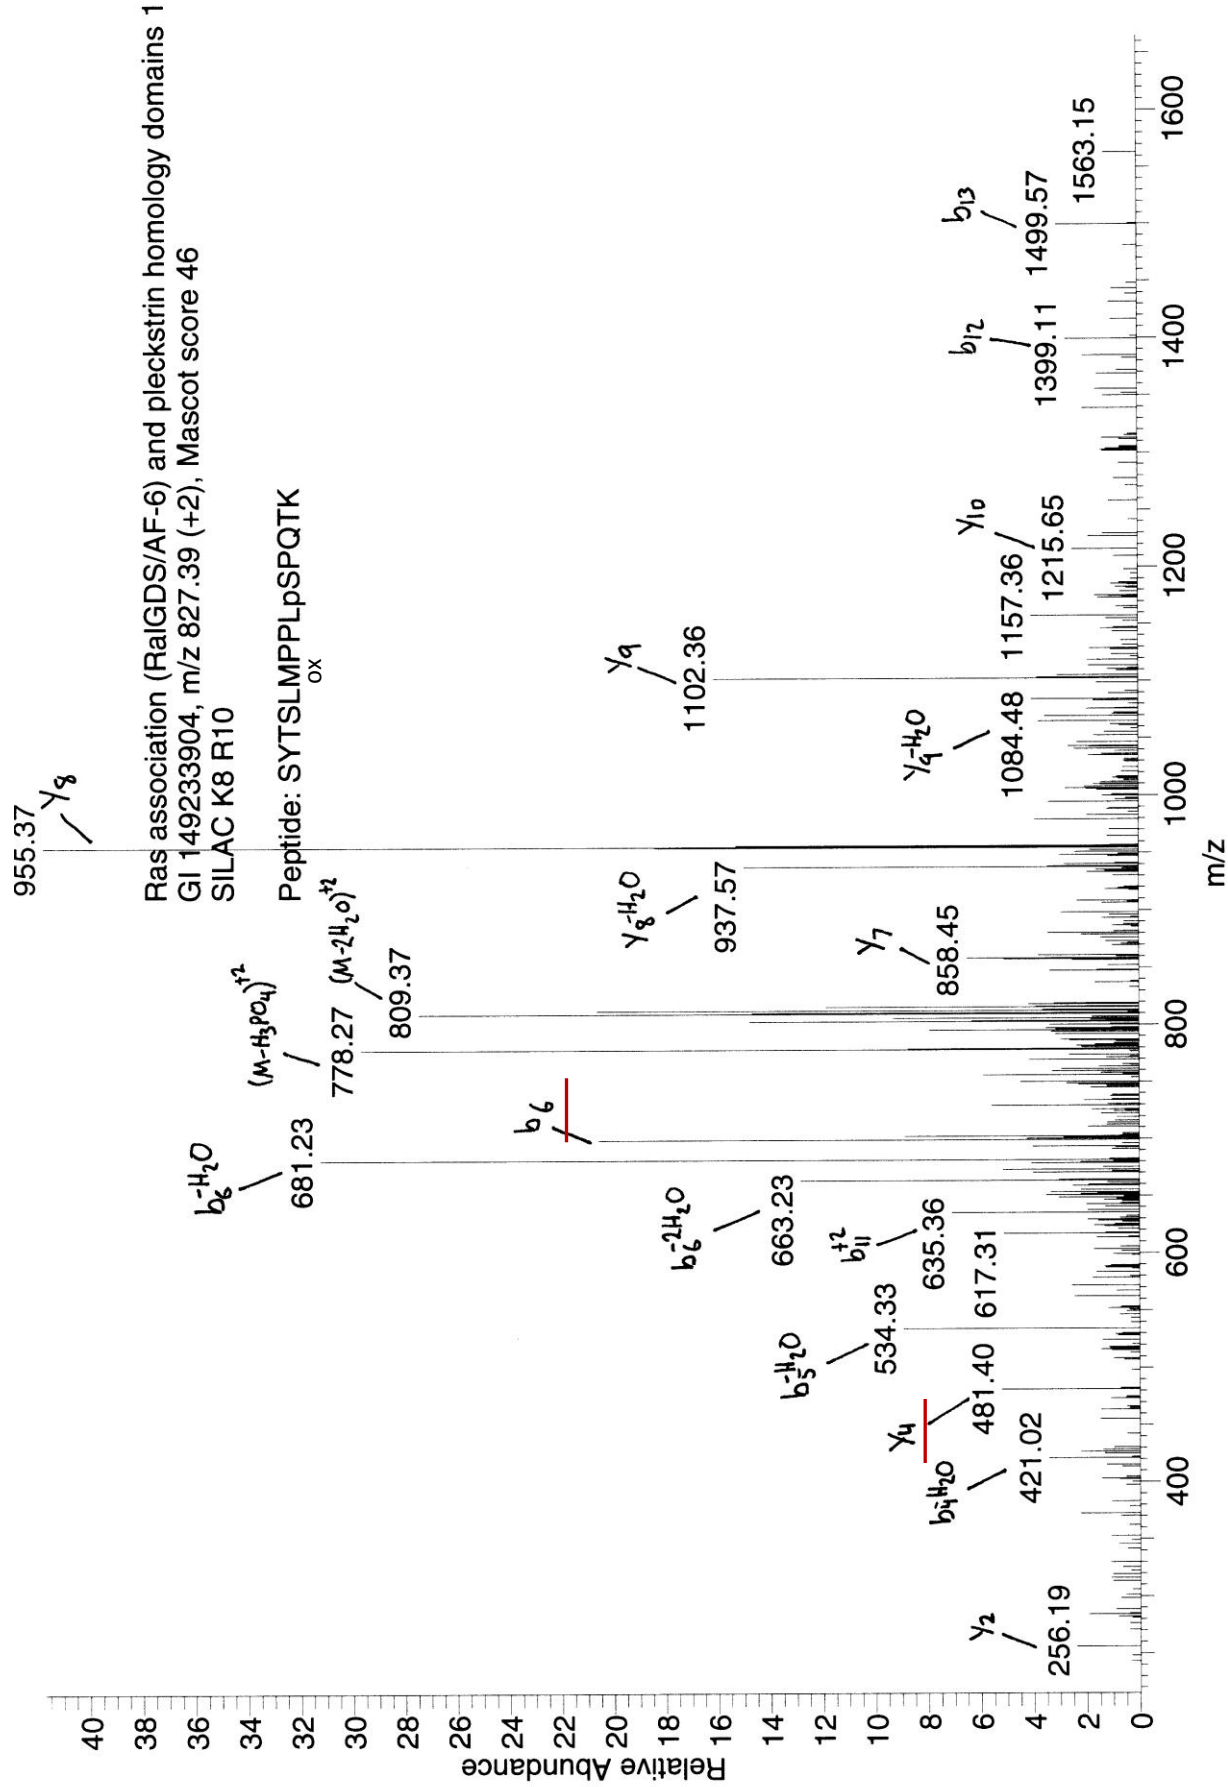

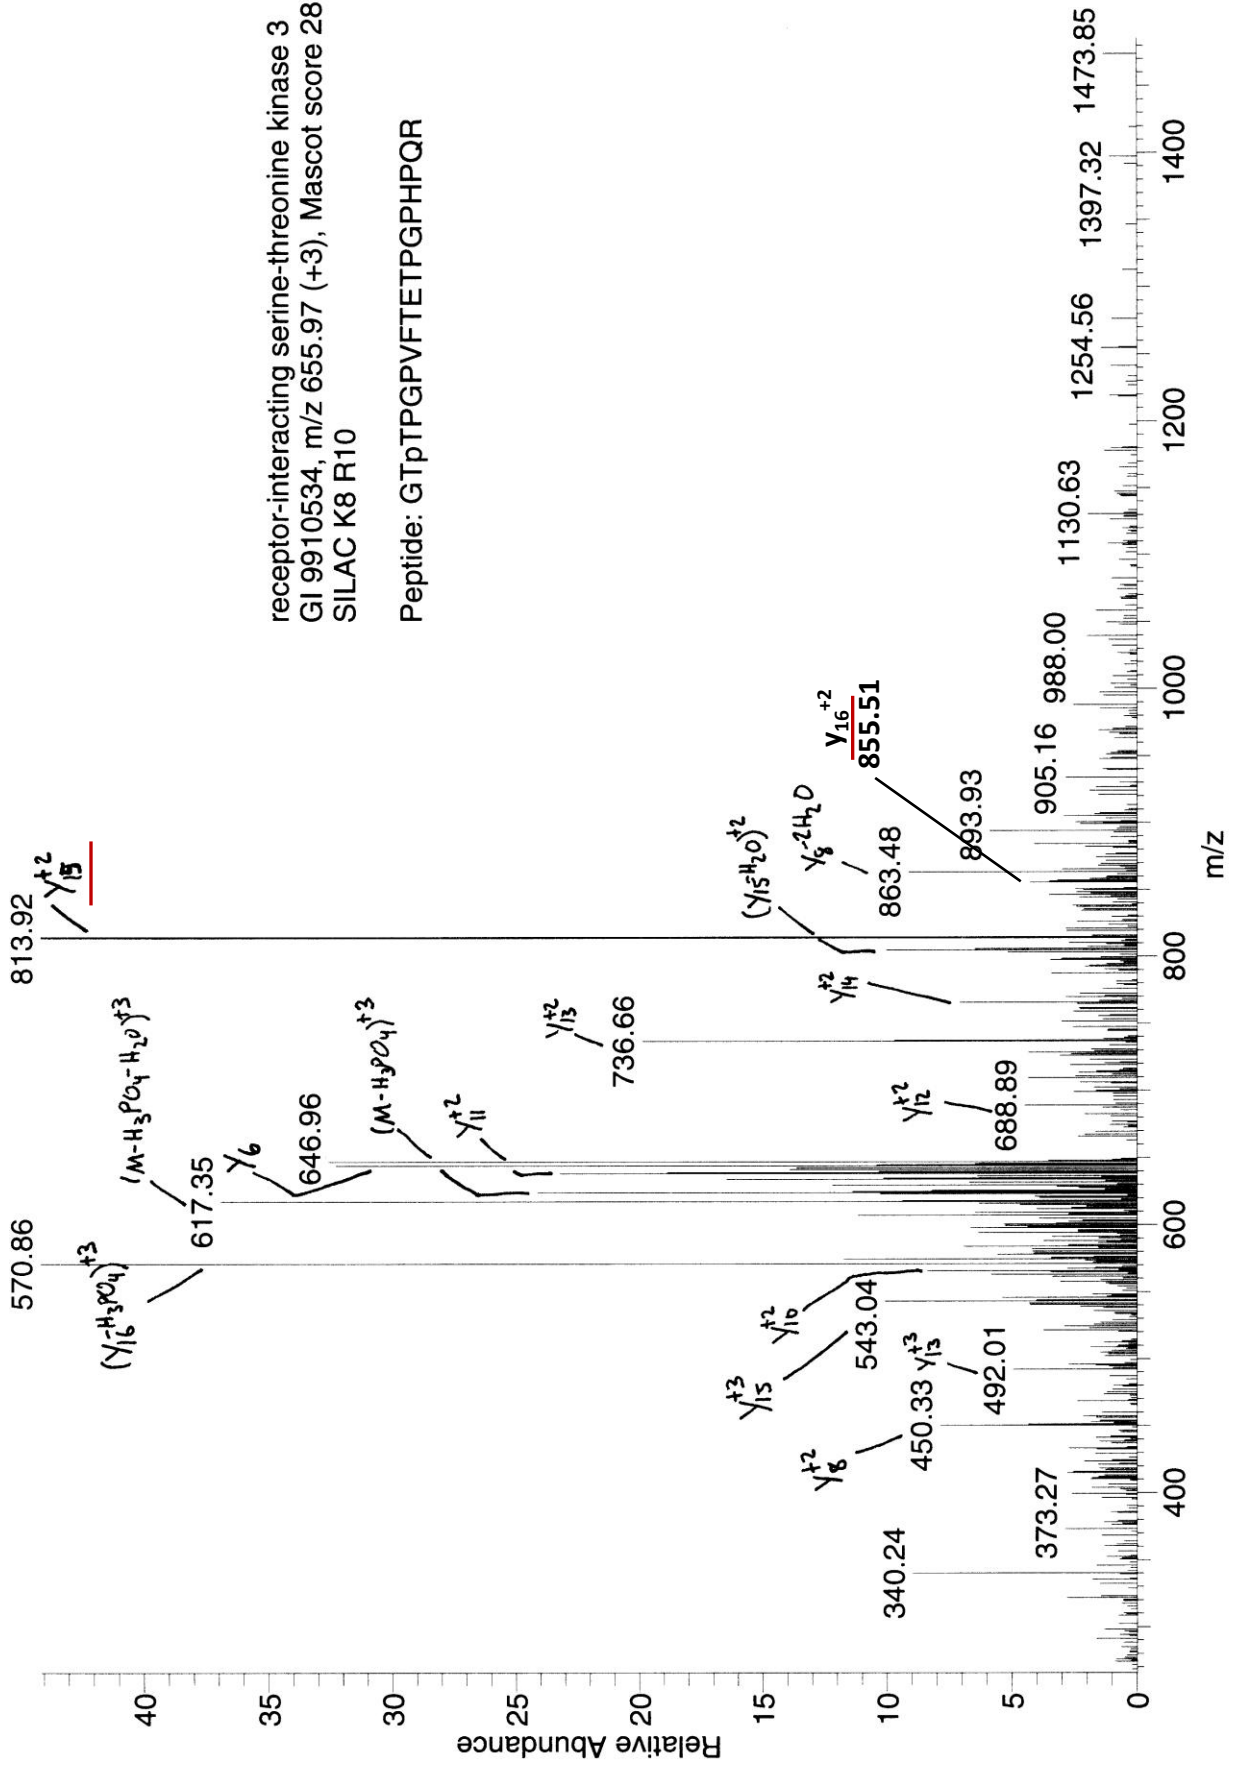

receptor-interacting serine-threonine kinase 3  
 GI 9910534, m/z 655.97 (+3), Mascot score 28  
 SILAC K8 R10

Peptide: GTpTPGPVFTETPGHPQR

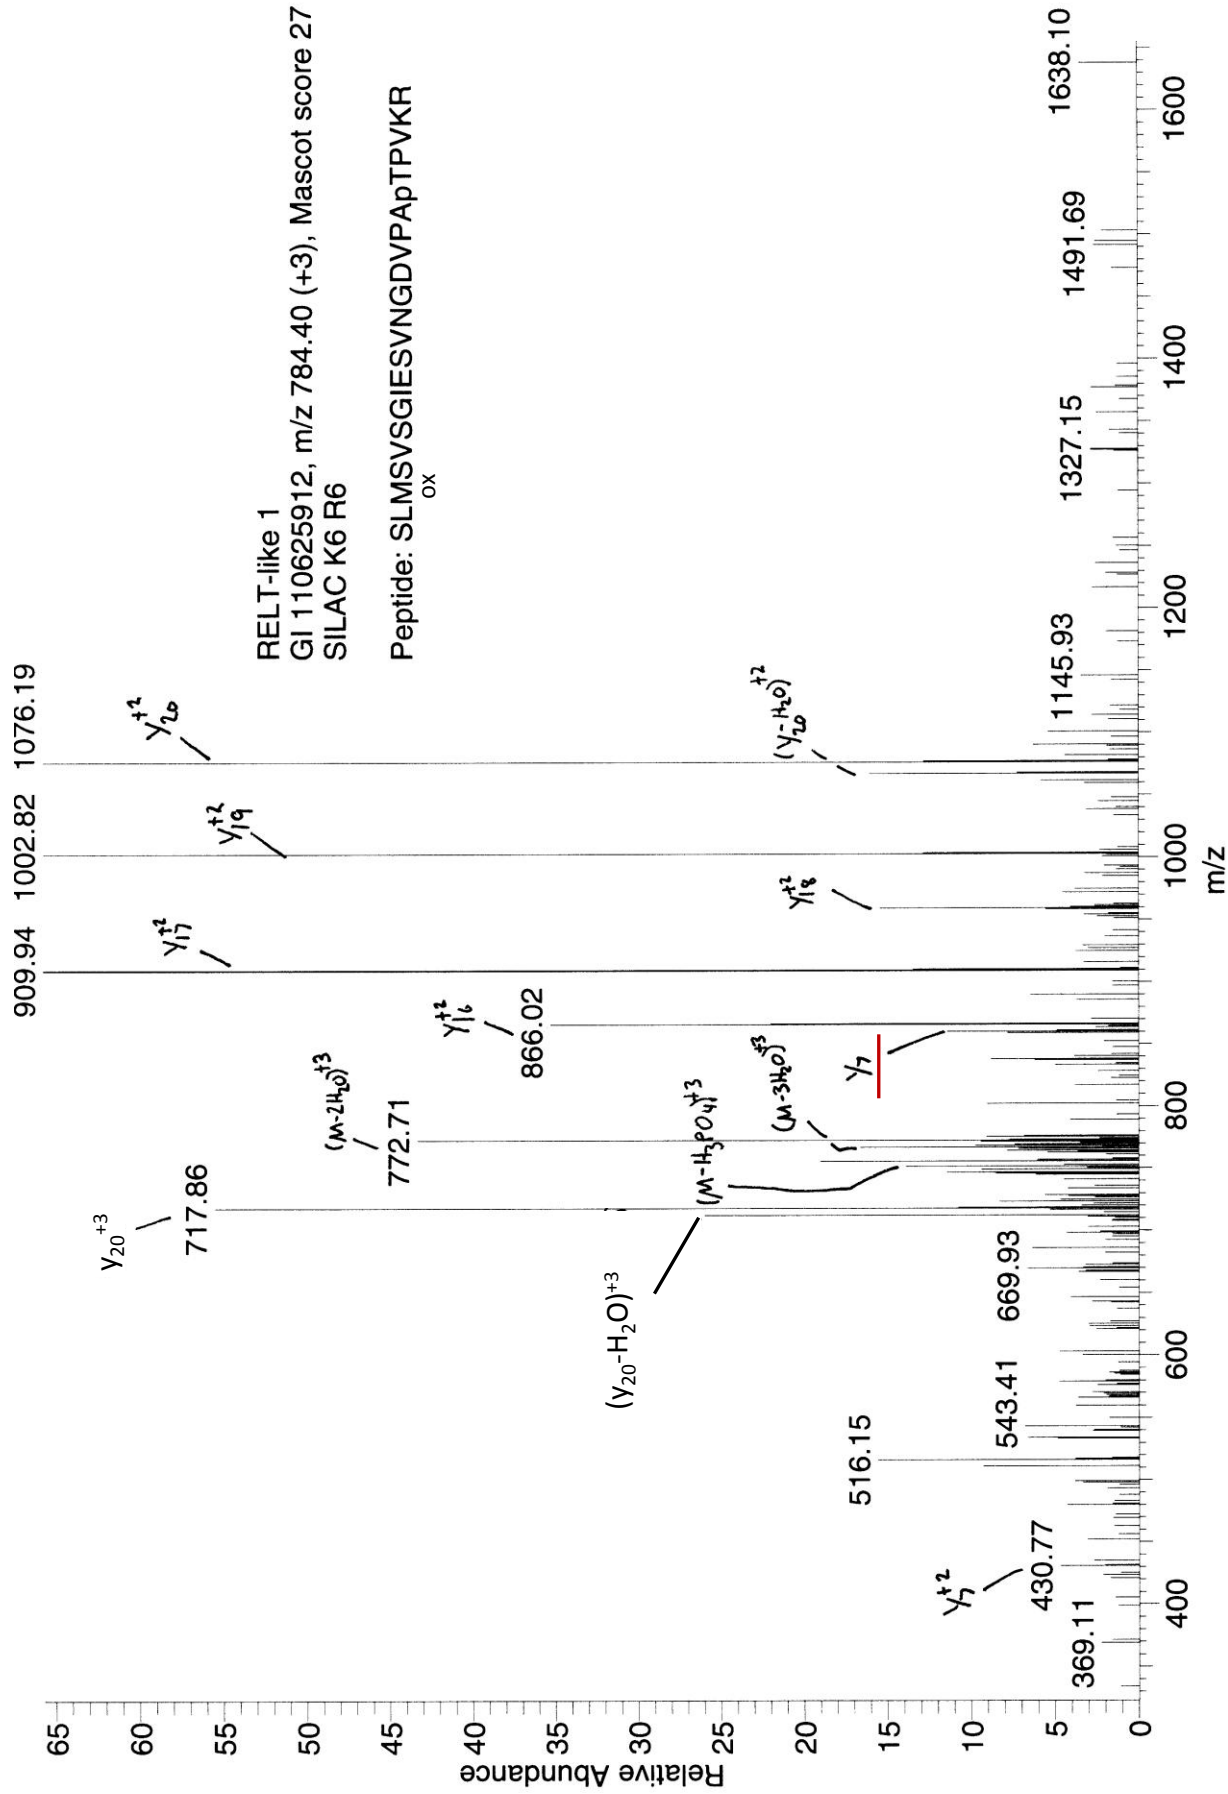



1095.18 1214.66

reticulon 4 isoform B1  
GI 34610233, m/z 1127.55 (+3), Mascot score 55  
SILAC K8 R10

Peptide: LPEDDEPPARPPAPAGASPLAEPAPPSpTPAAPK

$\gamma_9$   
953.47

$\gamma_{11}/b_{22}^{+2}$

$b_{25}^{+2}$

Relative Abundance

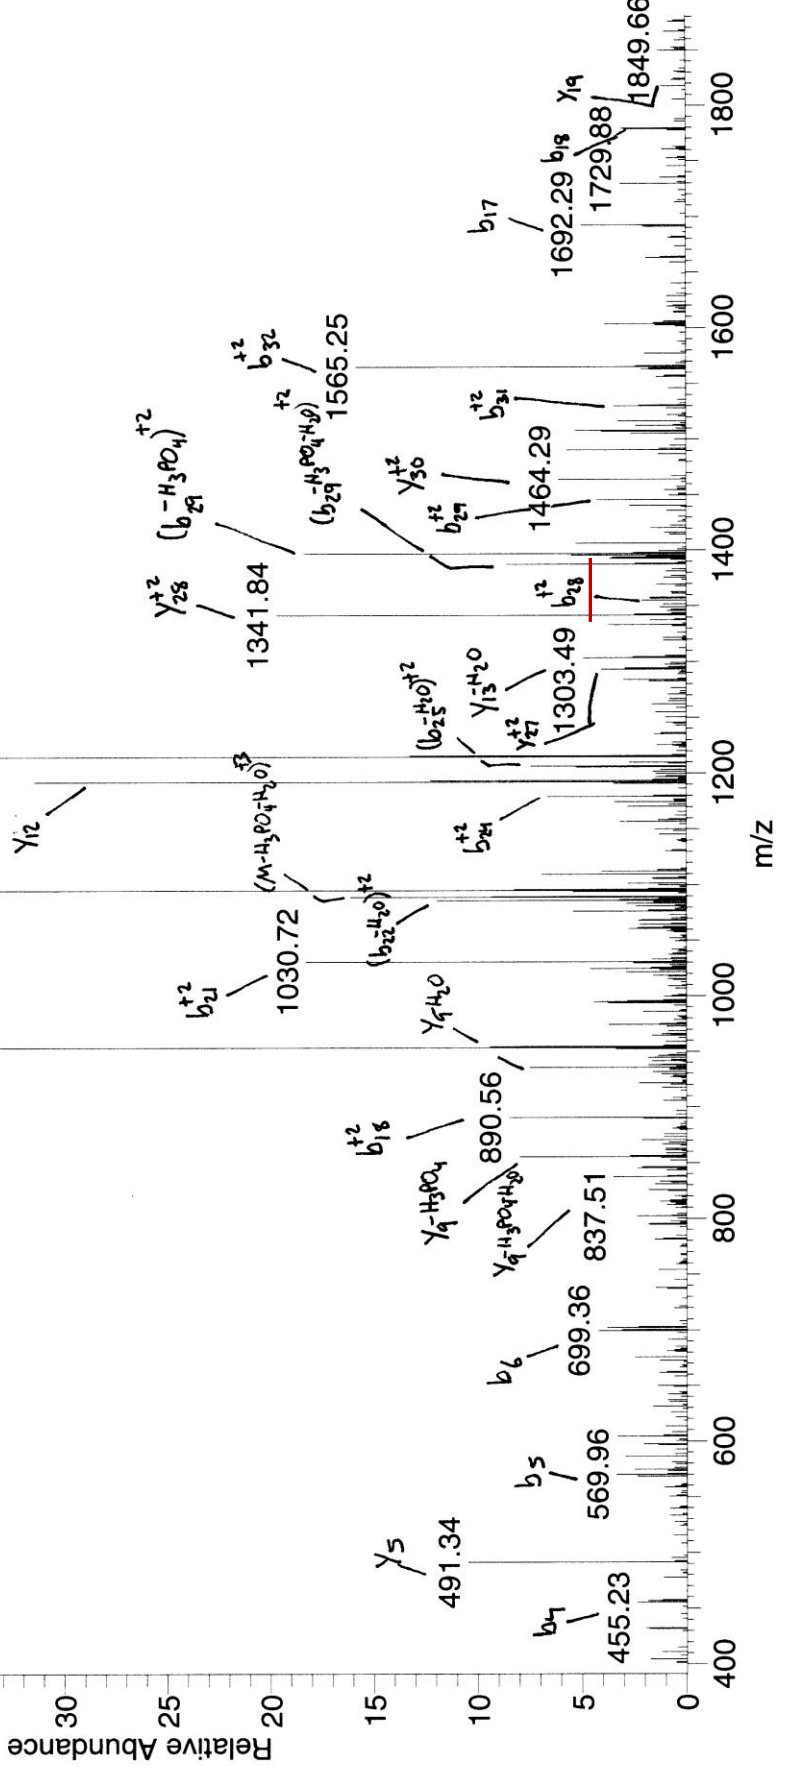

m/z



retinoic acid induced 1  
GI 83649745, m/z 864.43 (+3), Mascot score 38  
SILAC K8 R10

Peptide: SLTALSEPqTPGPPGLTTTPTPPDK

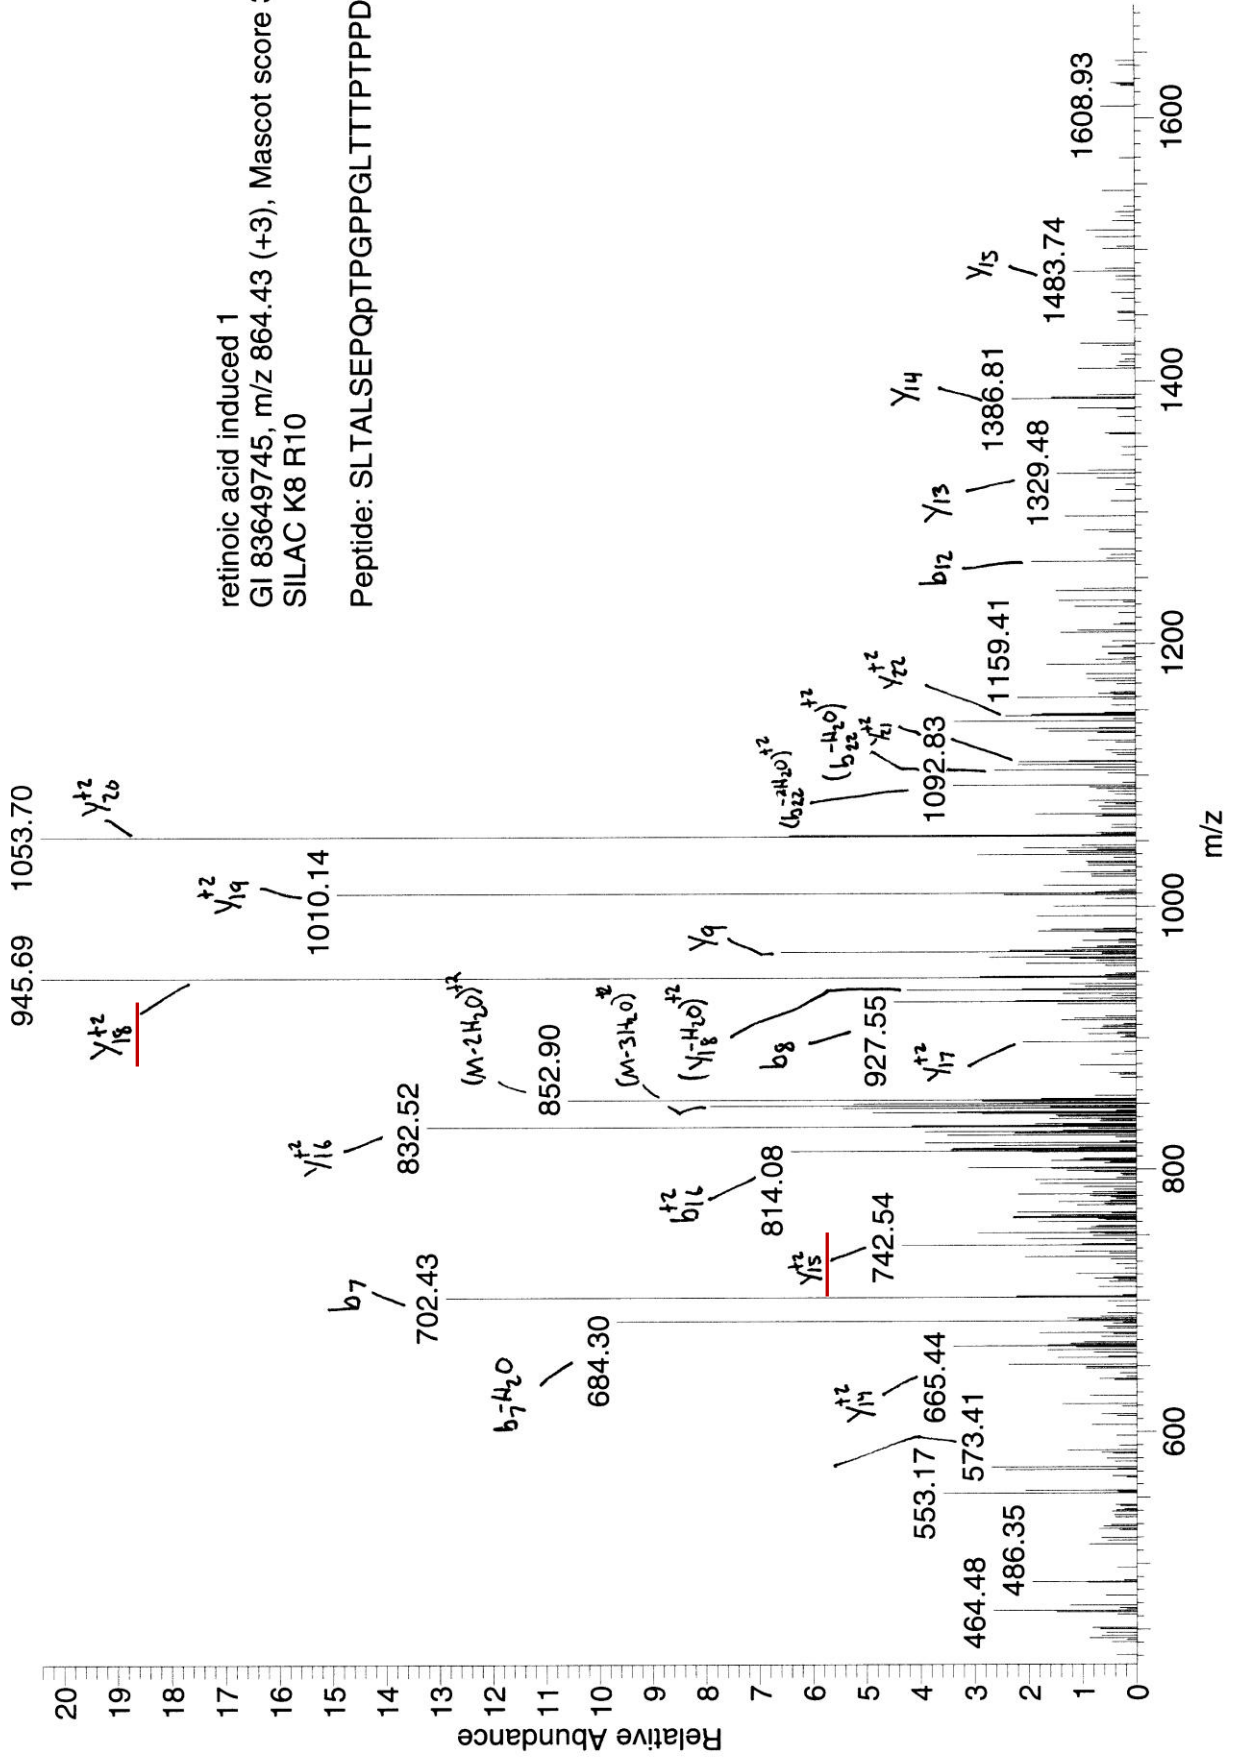

1088.40  $\gamma_9$

ribosomal protein S3  
 GI 6755372, m/z 779.87 (+2), Mascot score 56  
 SILAC K8 R10

Peptide: DEILPTpTPISEQK

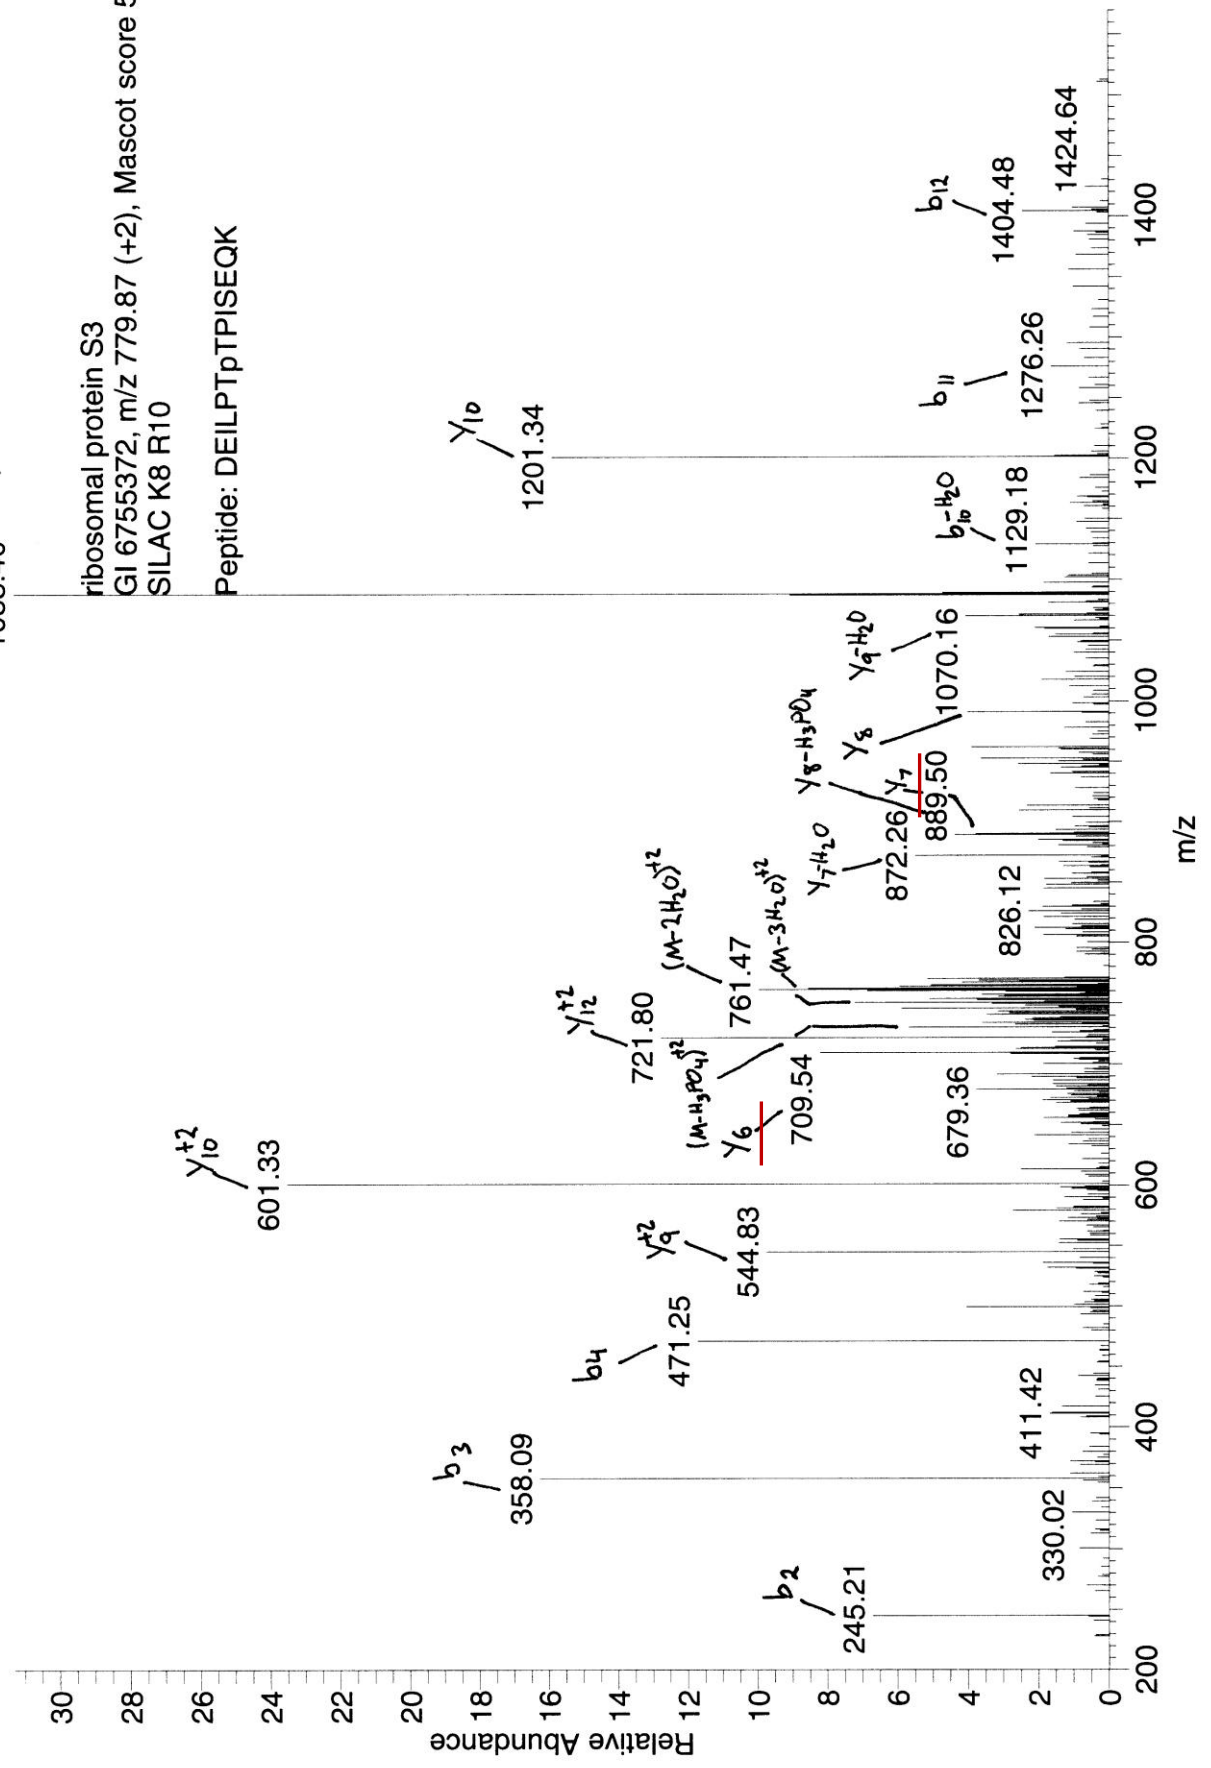

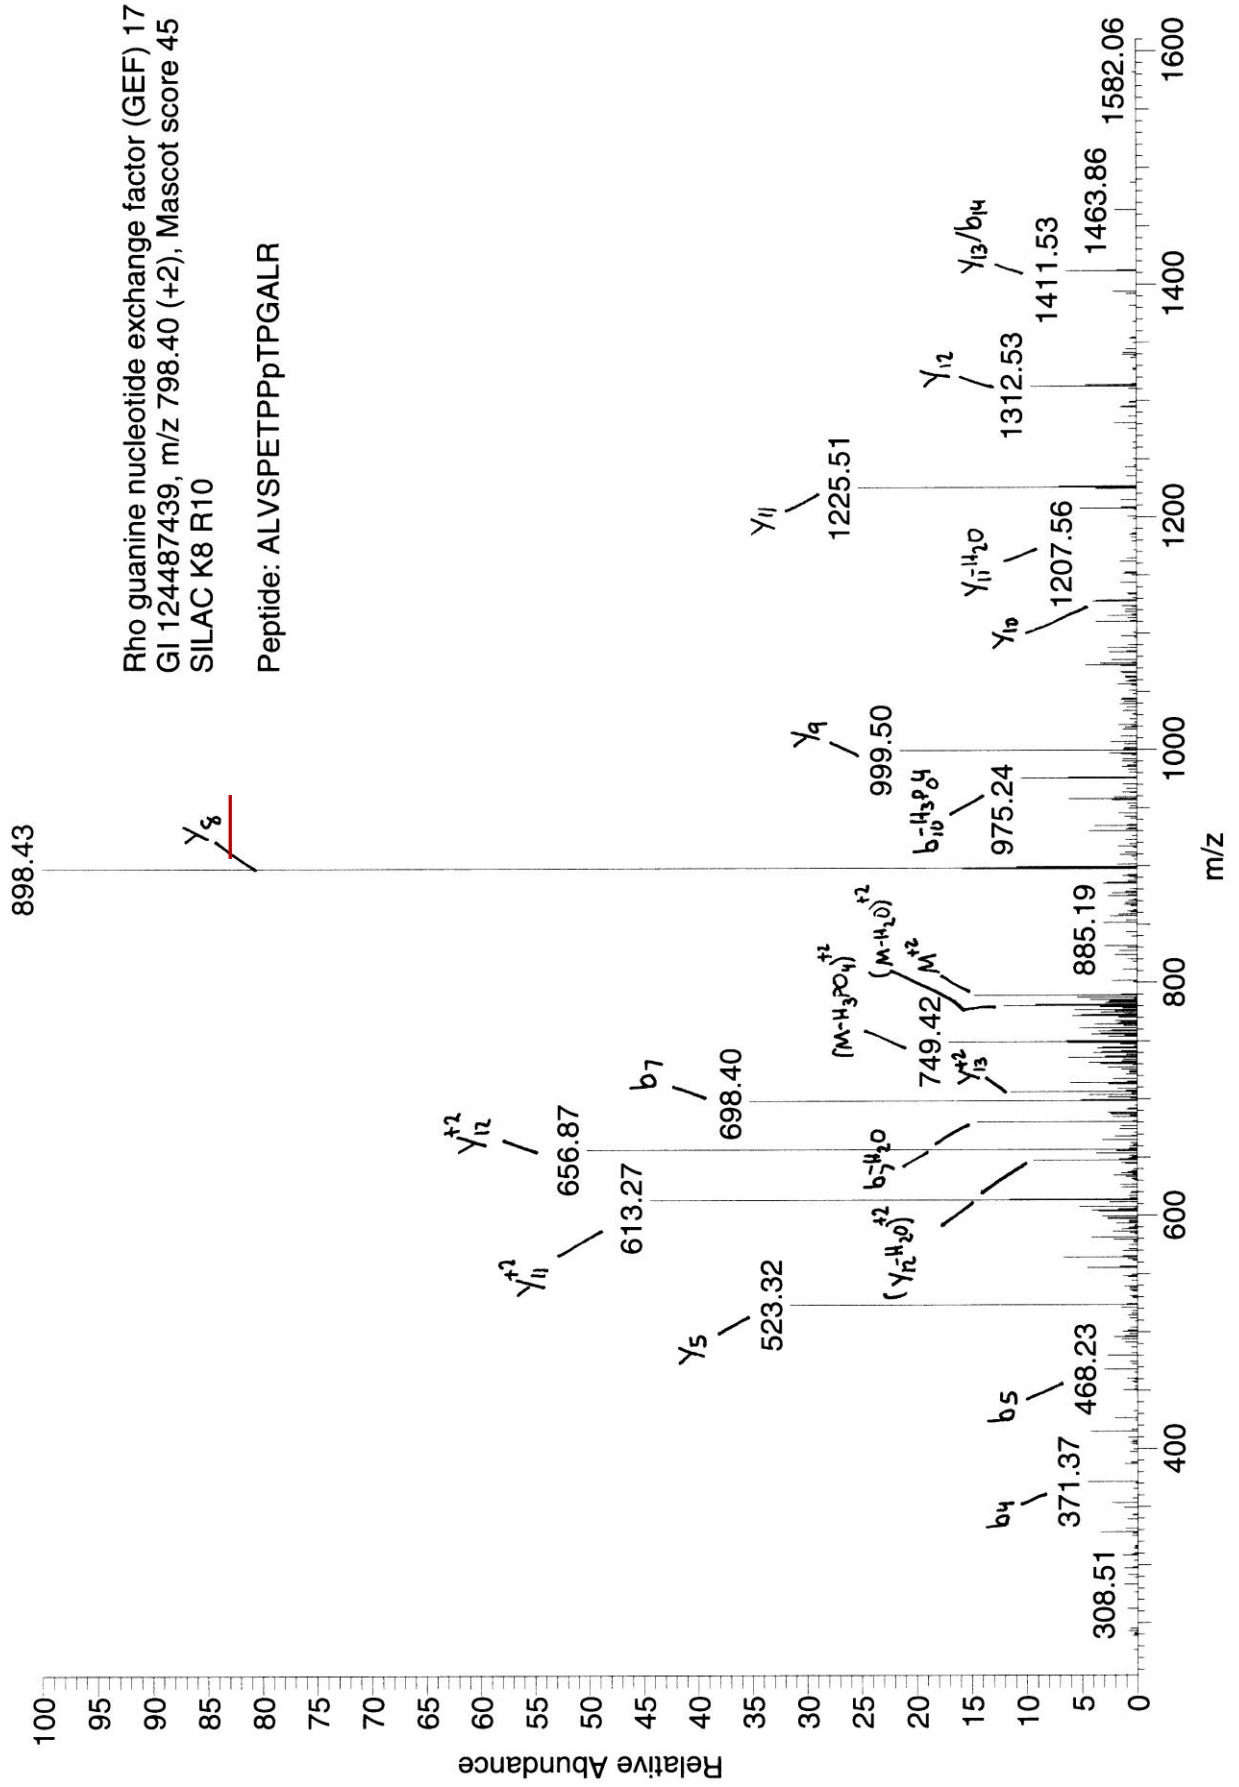

Rho guanine nucleotide exchange factor (GEF) 17  
 GI 124487439, m/z 798.40 (+2), Mascot score 45  
 SILAC K8 R10

Peptide: ALVSPETPPpTPGALR

RNA binding motif protein 9 isoform 1/2  
GI 30524926/30524922, m/z 888.38 (+3), Mascot score 64  
SILAC K6 R6

Peptide: TEEAADGGGMQNEPLpTPGYHGFPAR  
2ox

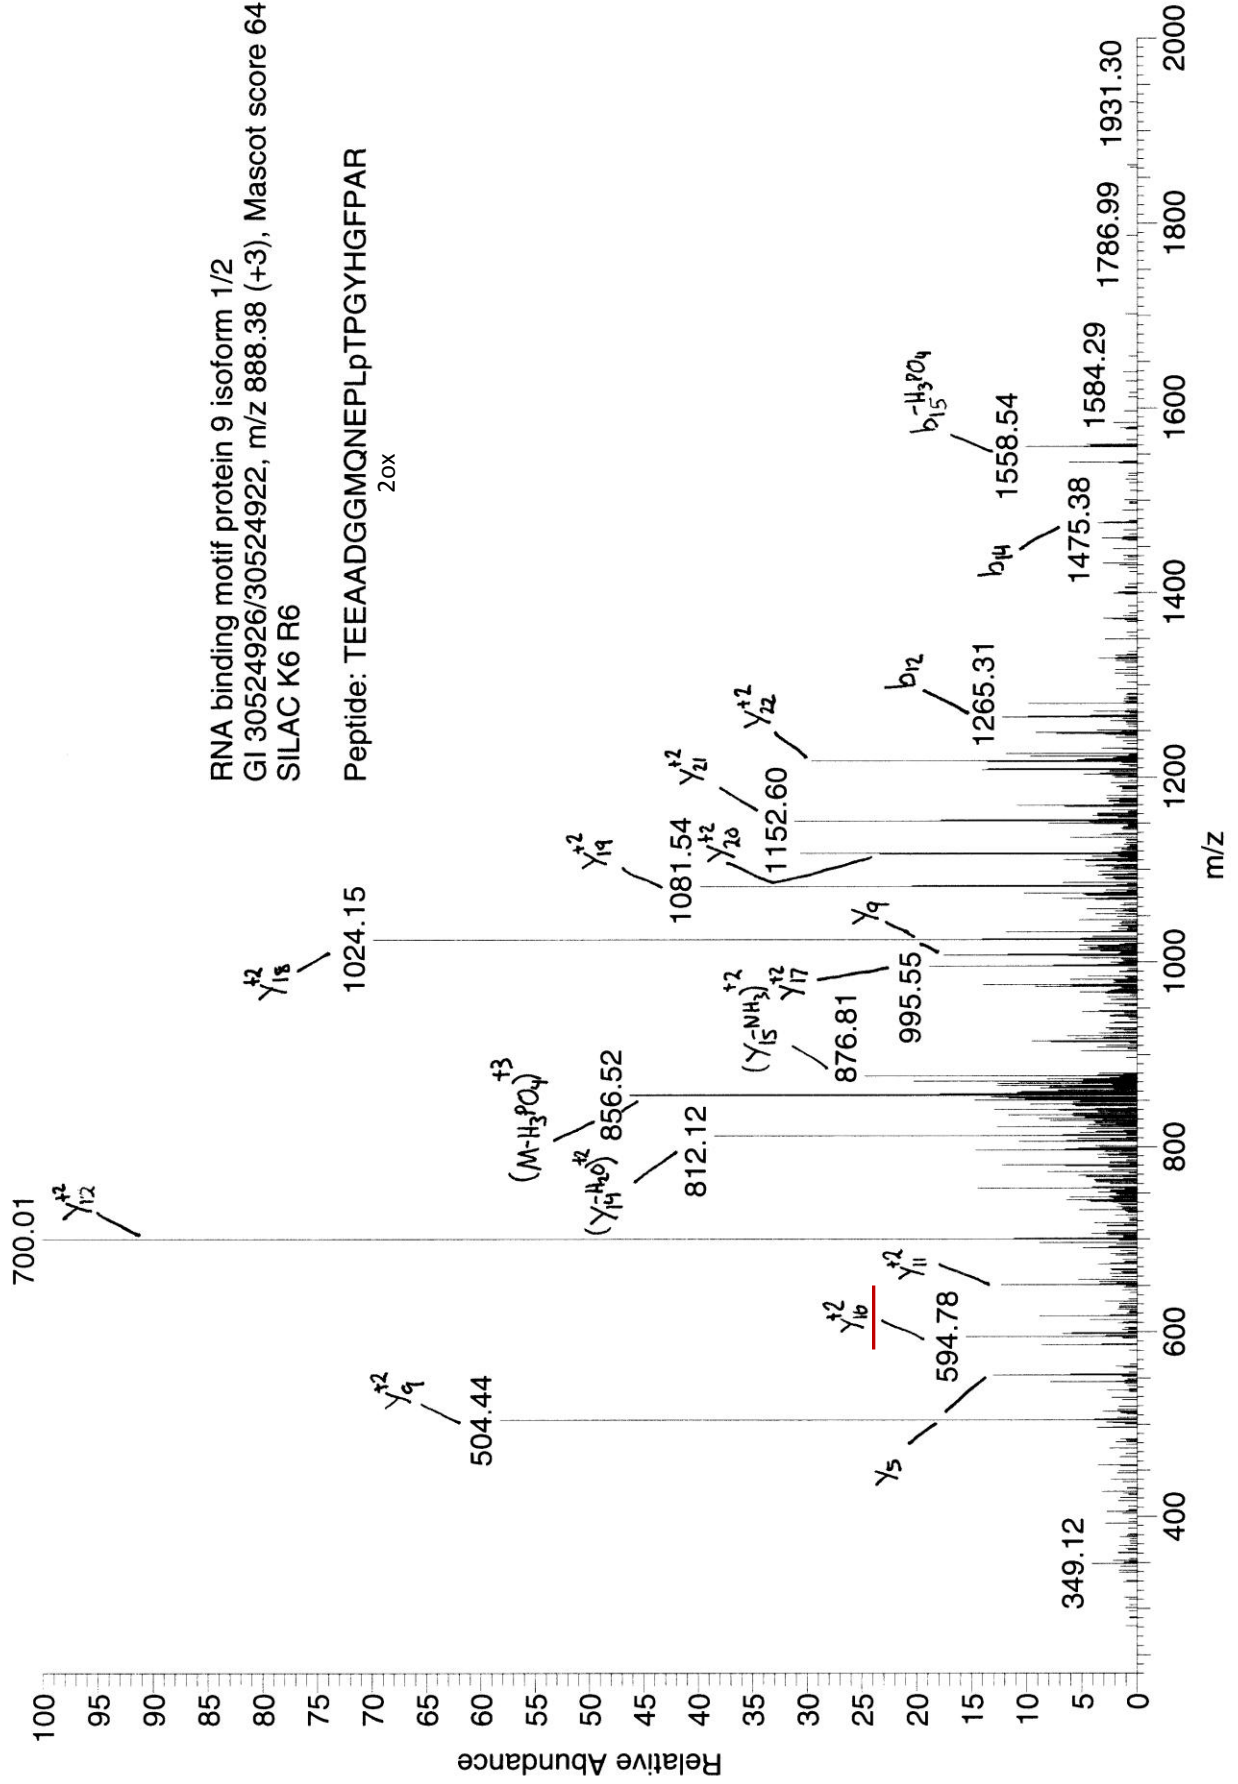

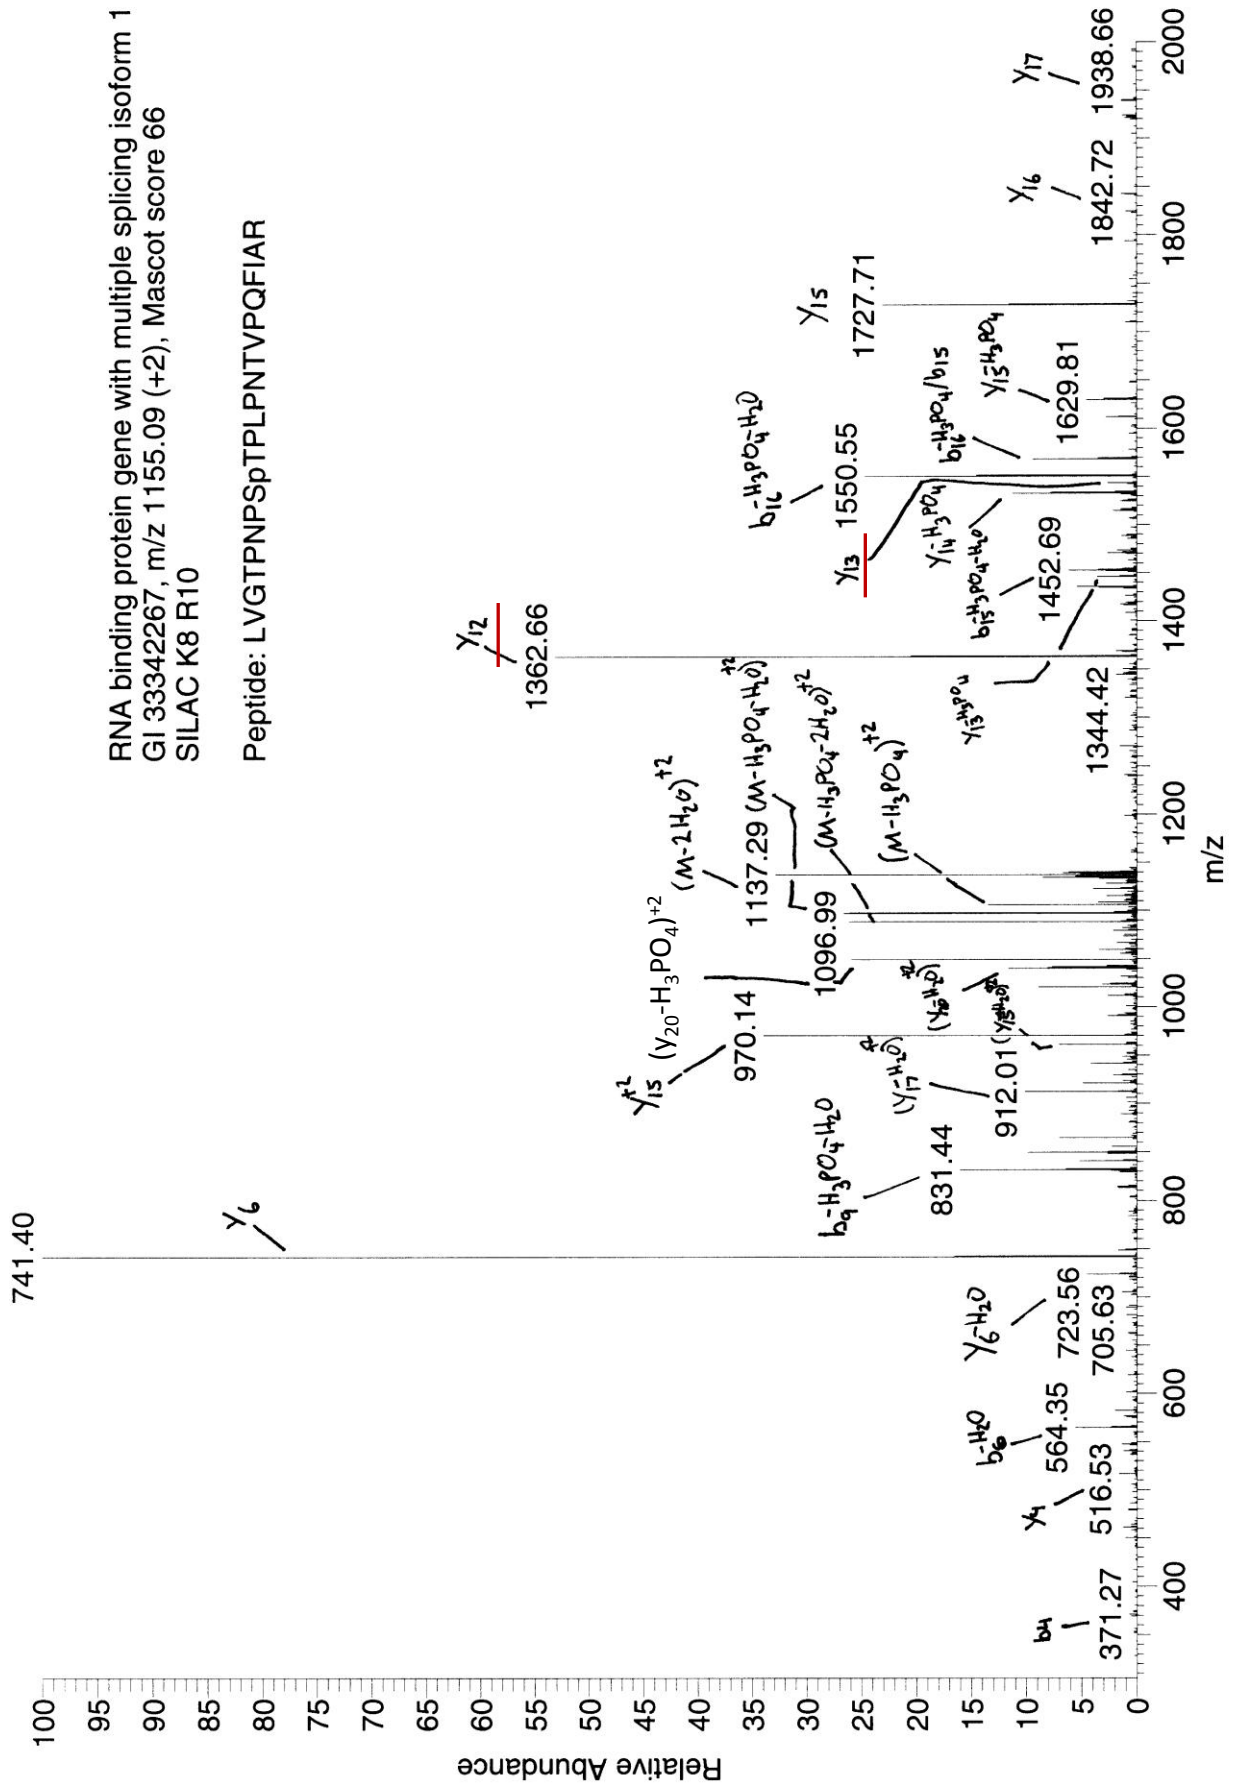

RNA binding protein gene with multiple splicing isoform 1  
 GI 33342267, m/z 1155.09 (+2), Mascot score 66  
 SILAC K8 R10

Peptide: LVGTPNPSpTLPNTVPQFIAR

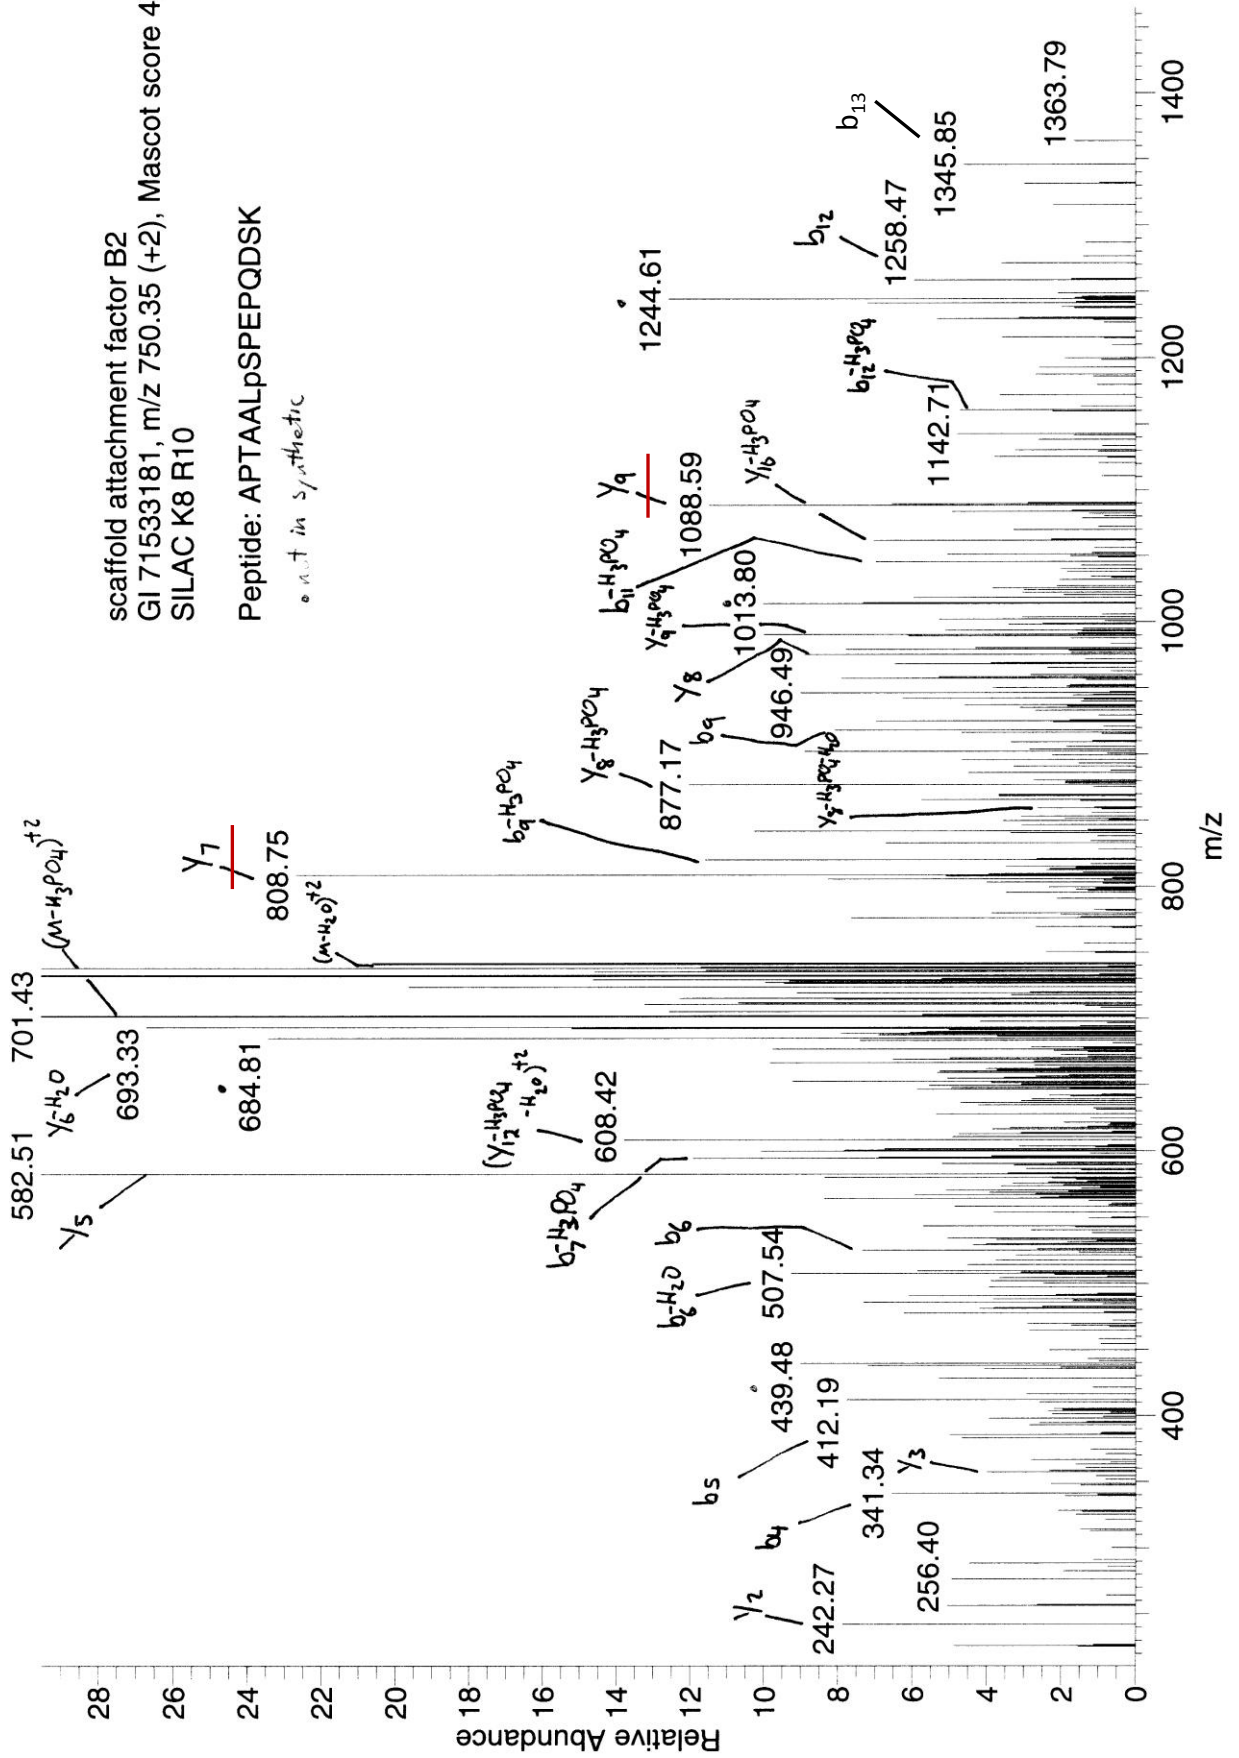

scaffold attachment factor B2  
 GI 71533181, m/z 750.35 (+2), Mascot score 48  
 SILAC K8 R10

Peptide: APTAALpSPEPQDSK  
*not in synthetic*



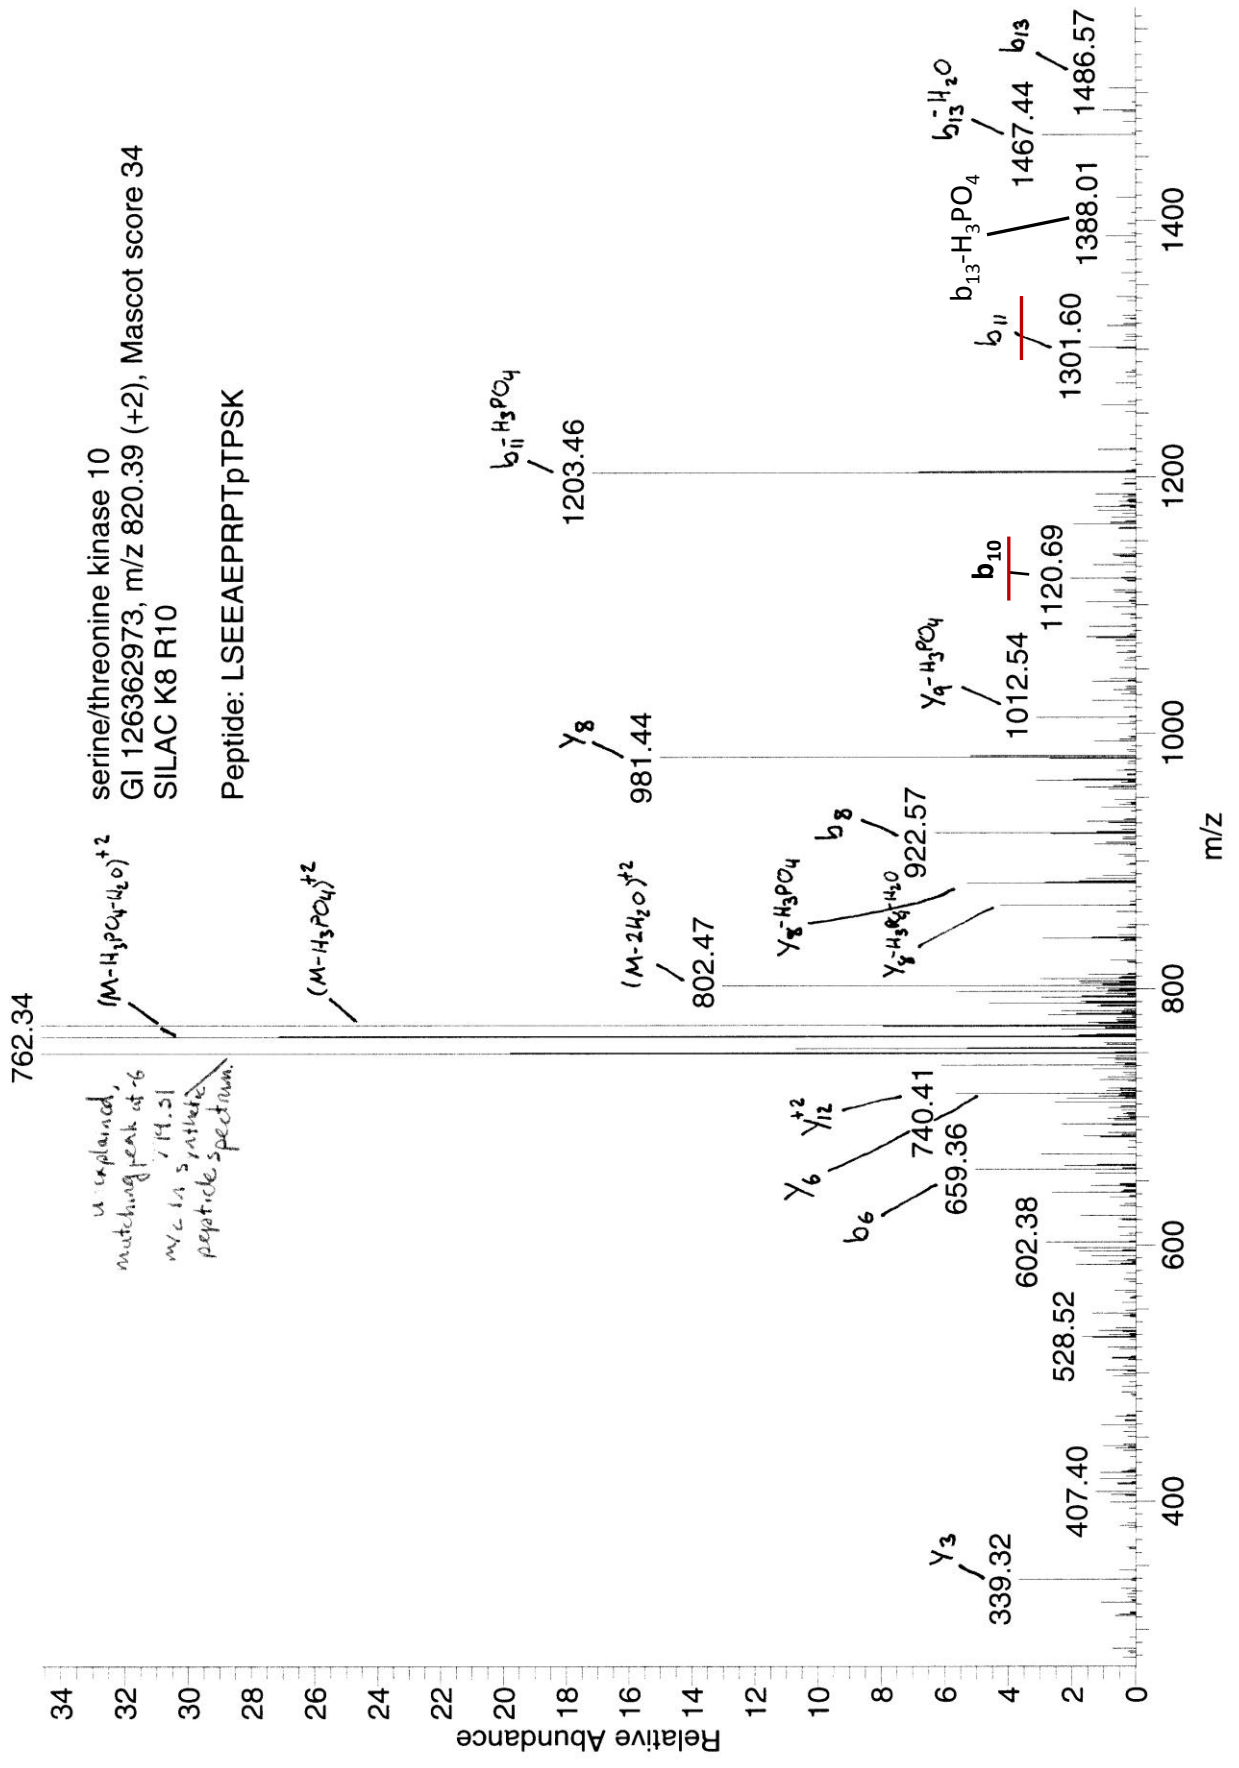

serine/threonine kinase 10  
 GI 126362973, m/z 820.39 (+2), Mascot score 34  
 SILAC K8 R10

Peptide: LSEEAERPRTPPSK

*u explained,  
 matching peak at -6  
 m/z in 5<sup>th</sup> iterative  
 peptide spectrum.*



single-stranded DNA-binding protein isoform a  
 GI 38372897, m/z 904.43 (+2), Mascot score 54  
 SILAC K6 R6

Peptide: NSPNNISGISNPPGpTPR

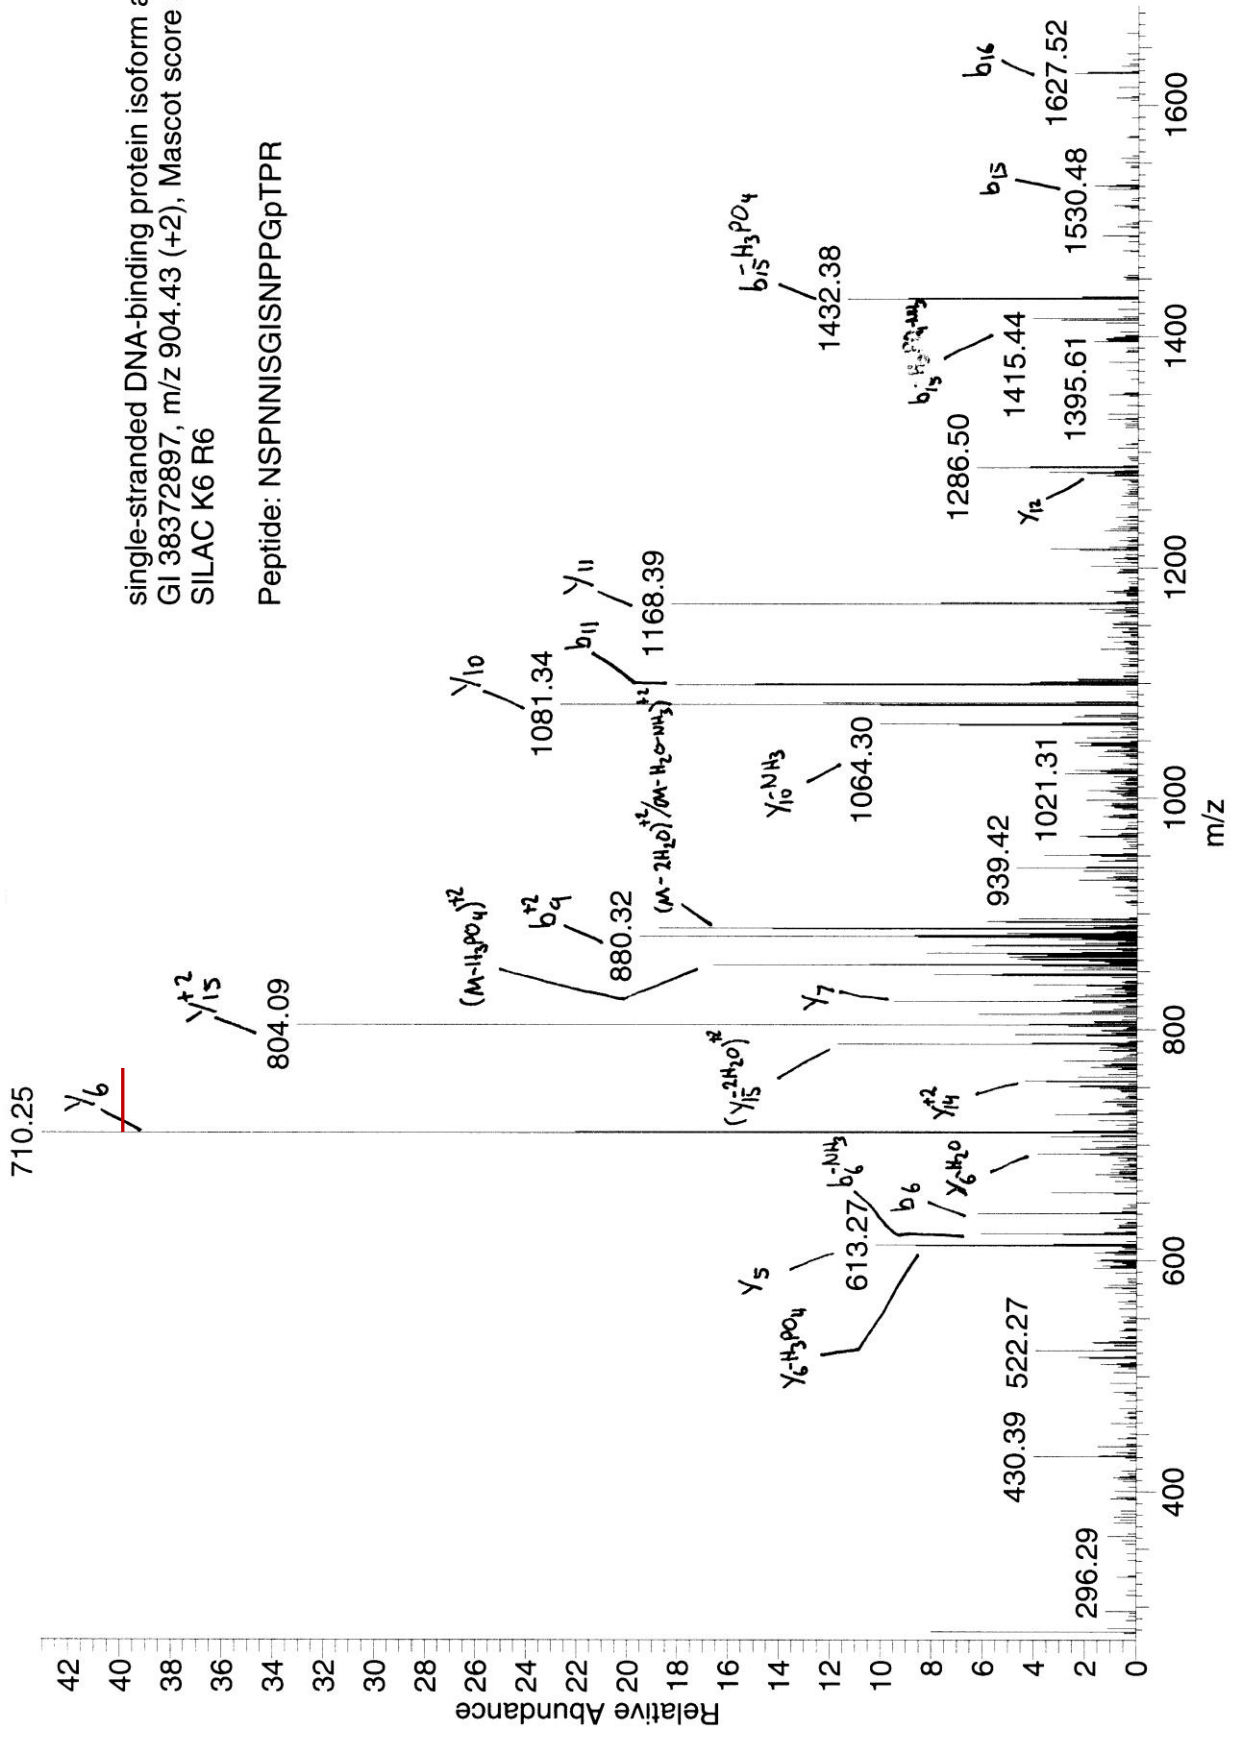

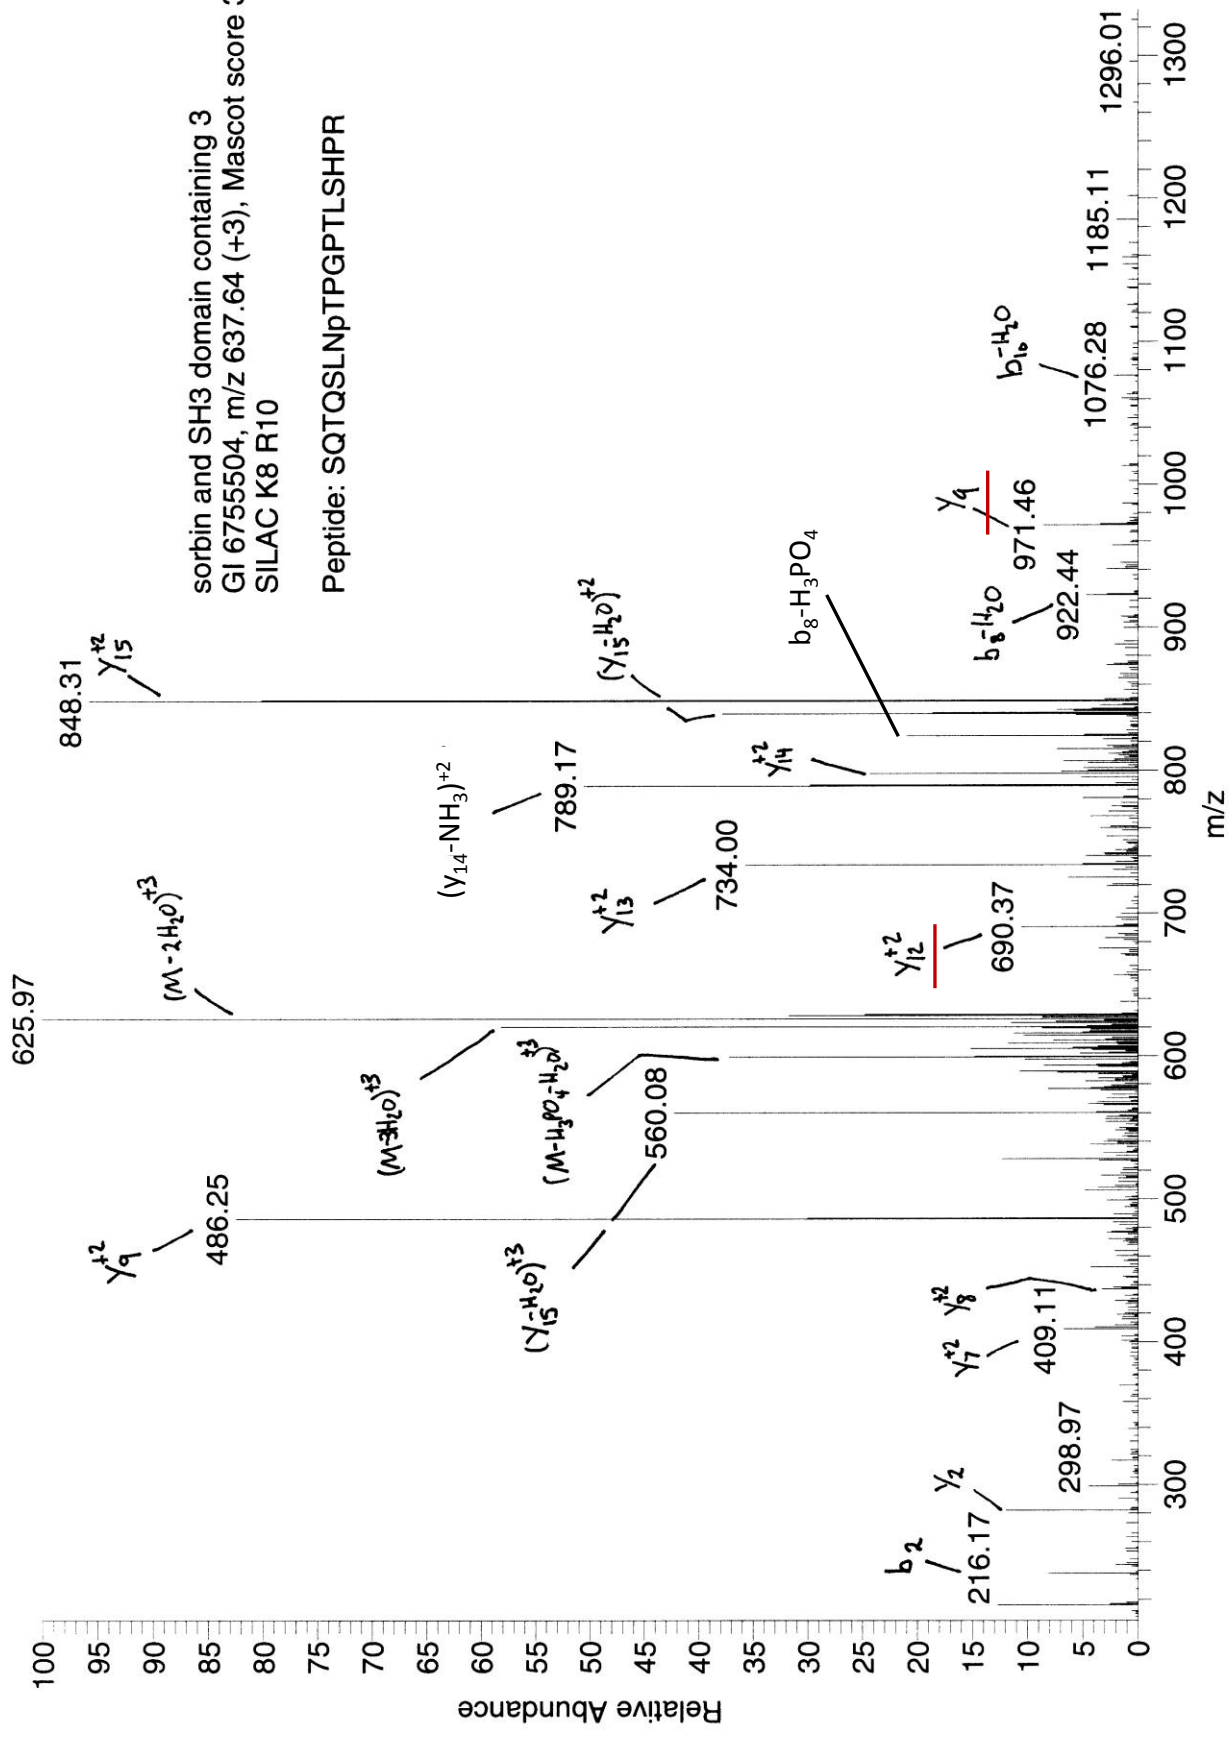

sorbin and SH3 domain containing 3  
 GI 6755504, m/z 637.64 (+3), Mascot score 35  
 SILAC K8 R10

Peptide: SQTQSLNpTPGPTLSHPR

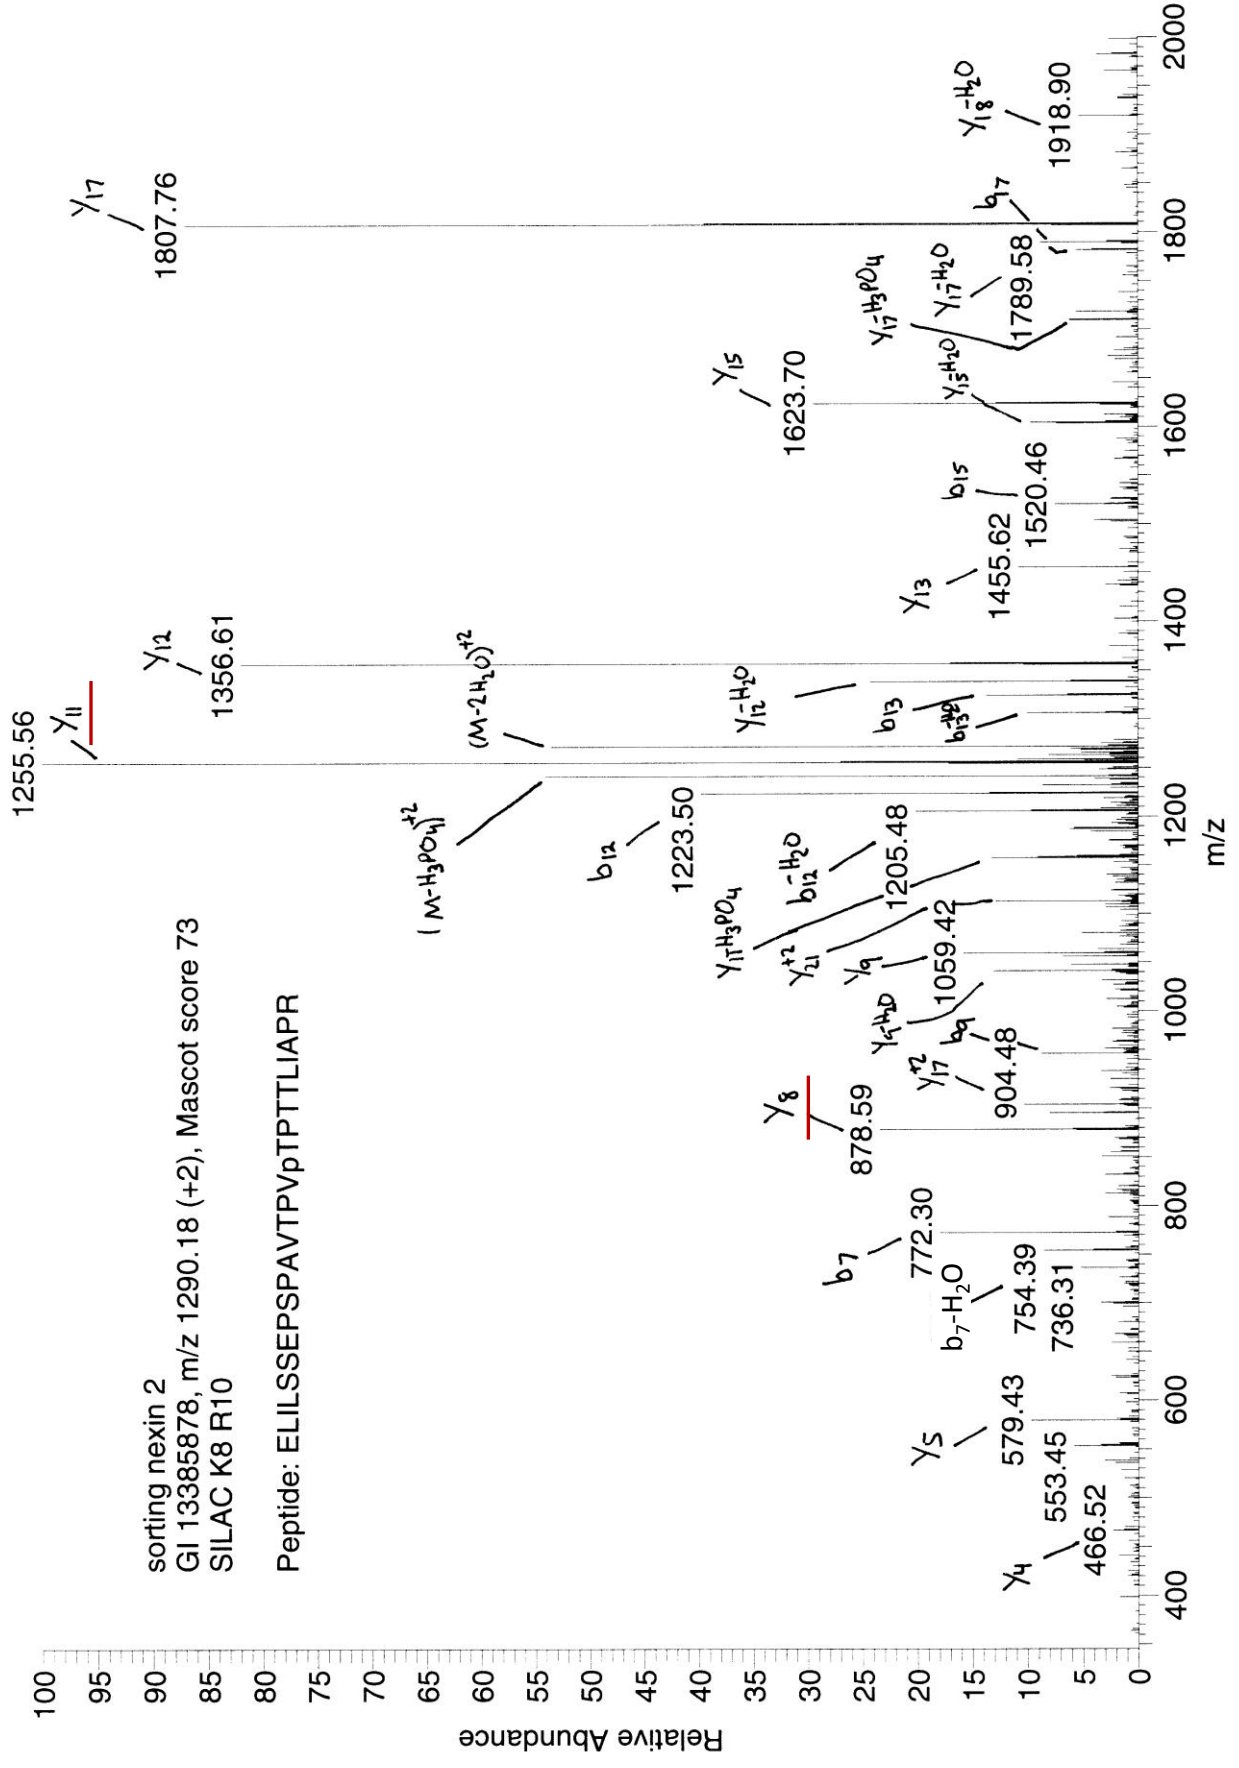

sorting nexin 2  
 GI 13385878, m/z 1290.18 (+2), Mascot score 73  
 SILAC K8 R10

Peptide: ELILSSEPAVTPVpTPPTTLIAPR

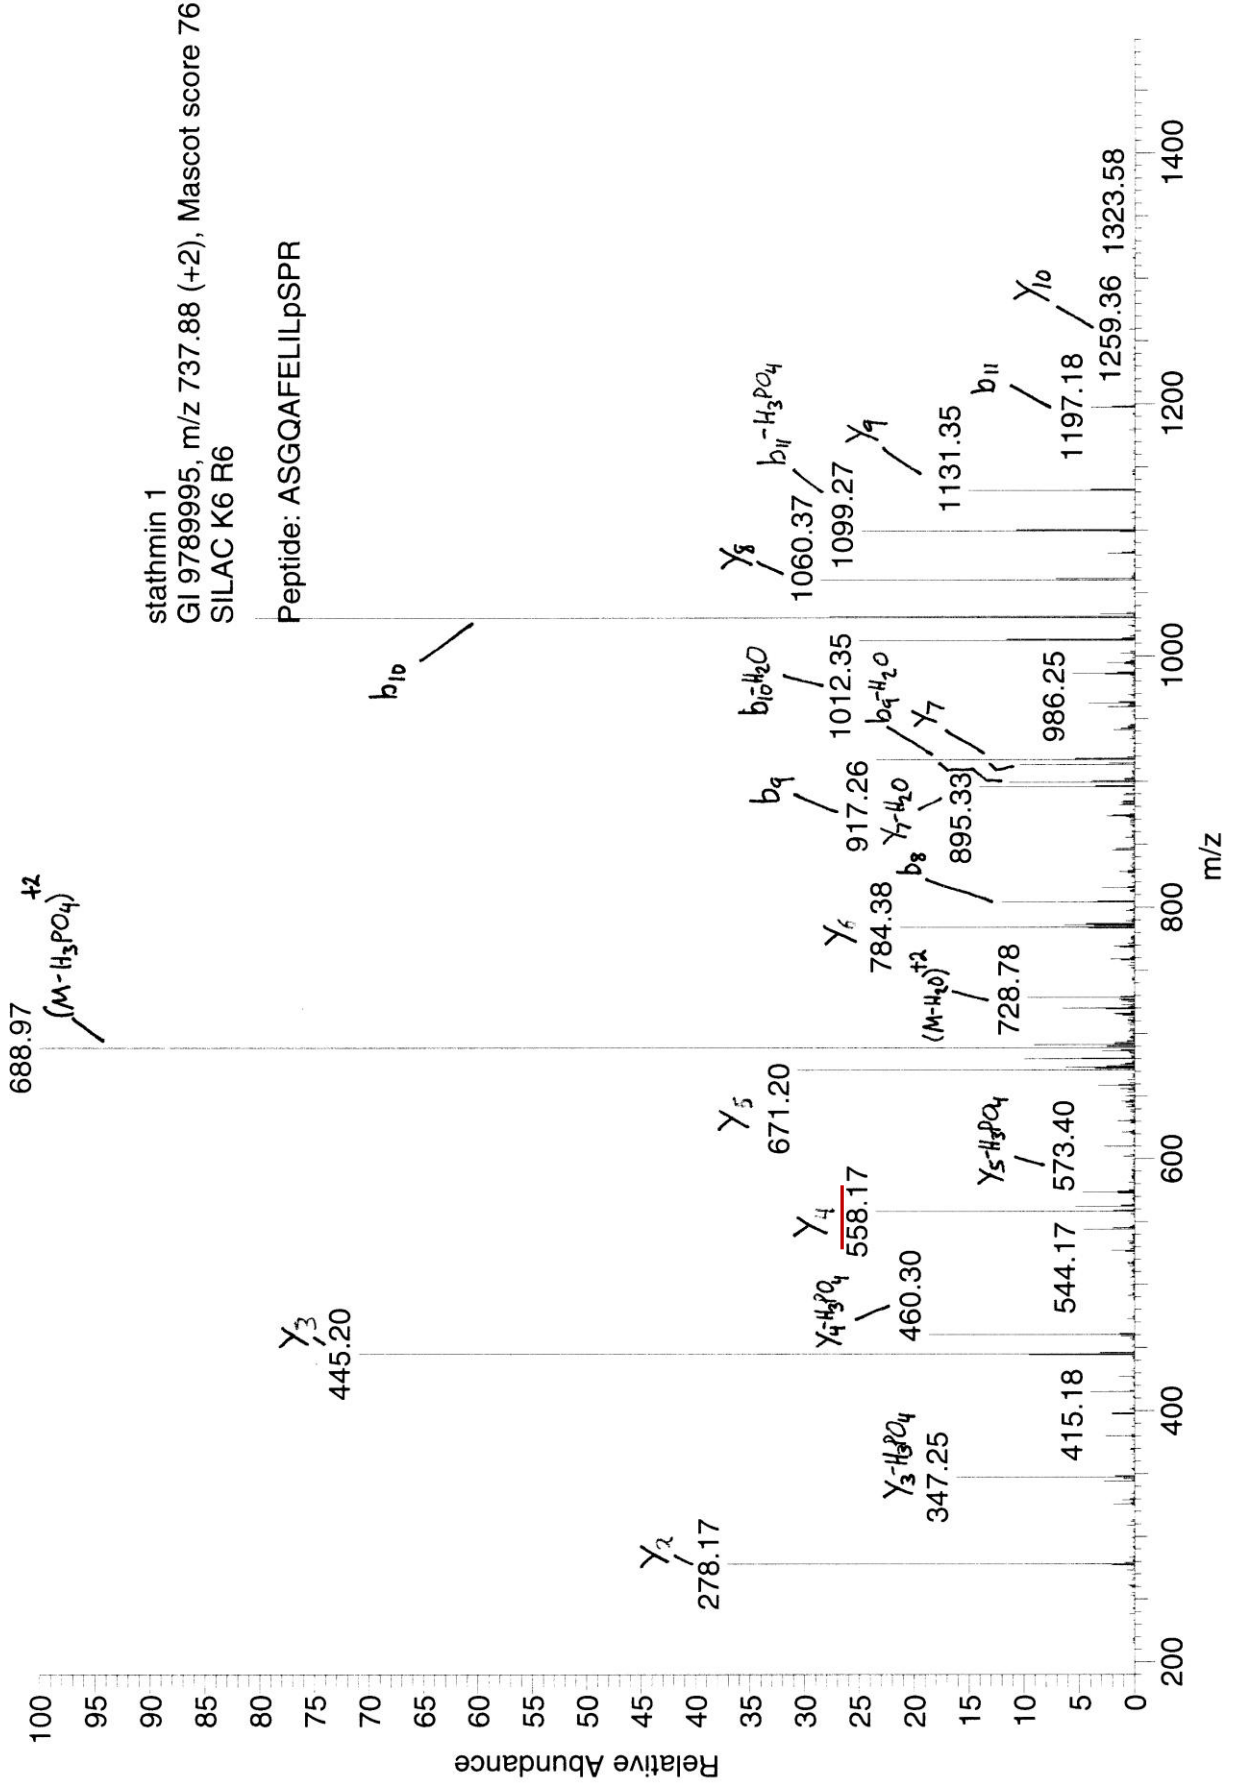

stathmin 1  
 GI 9789995, m/z 737.88 (+2), Mascot score 76  
 SILAC K6 R6

Peptide: ASGQAFELILpSPR

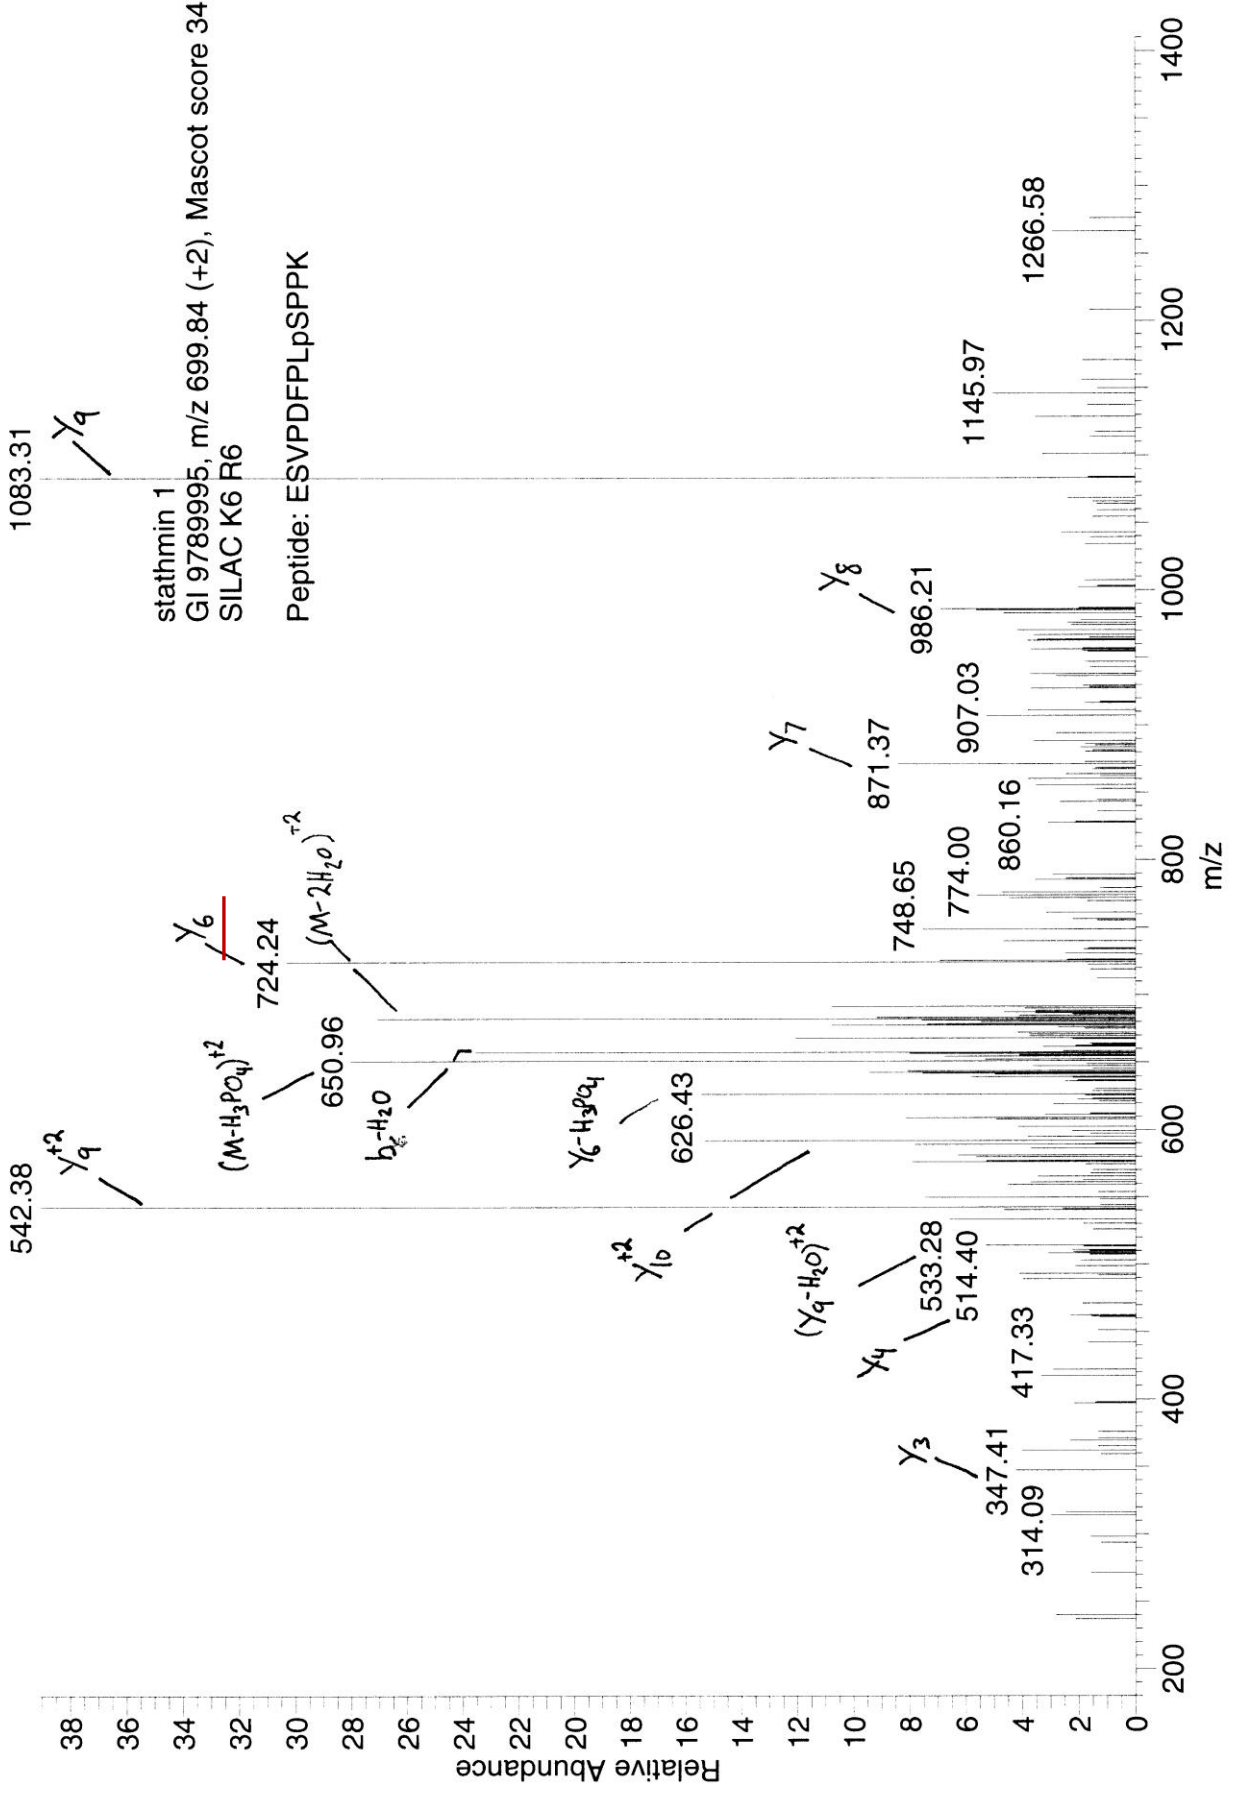

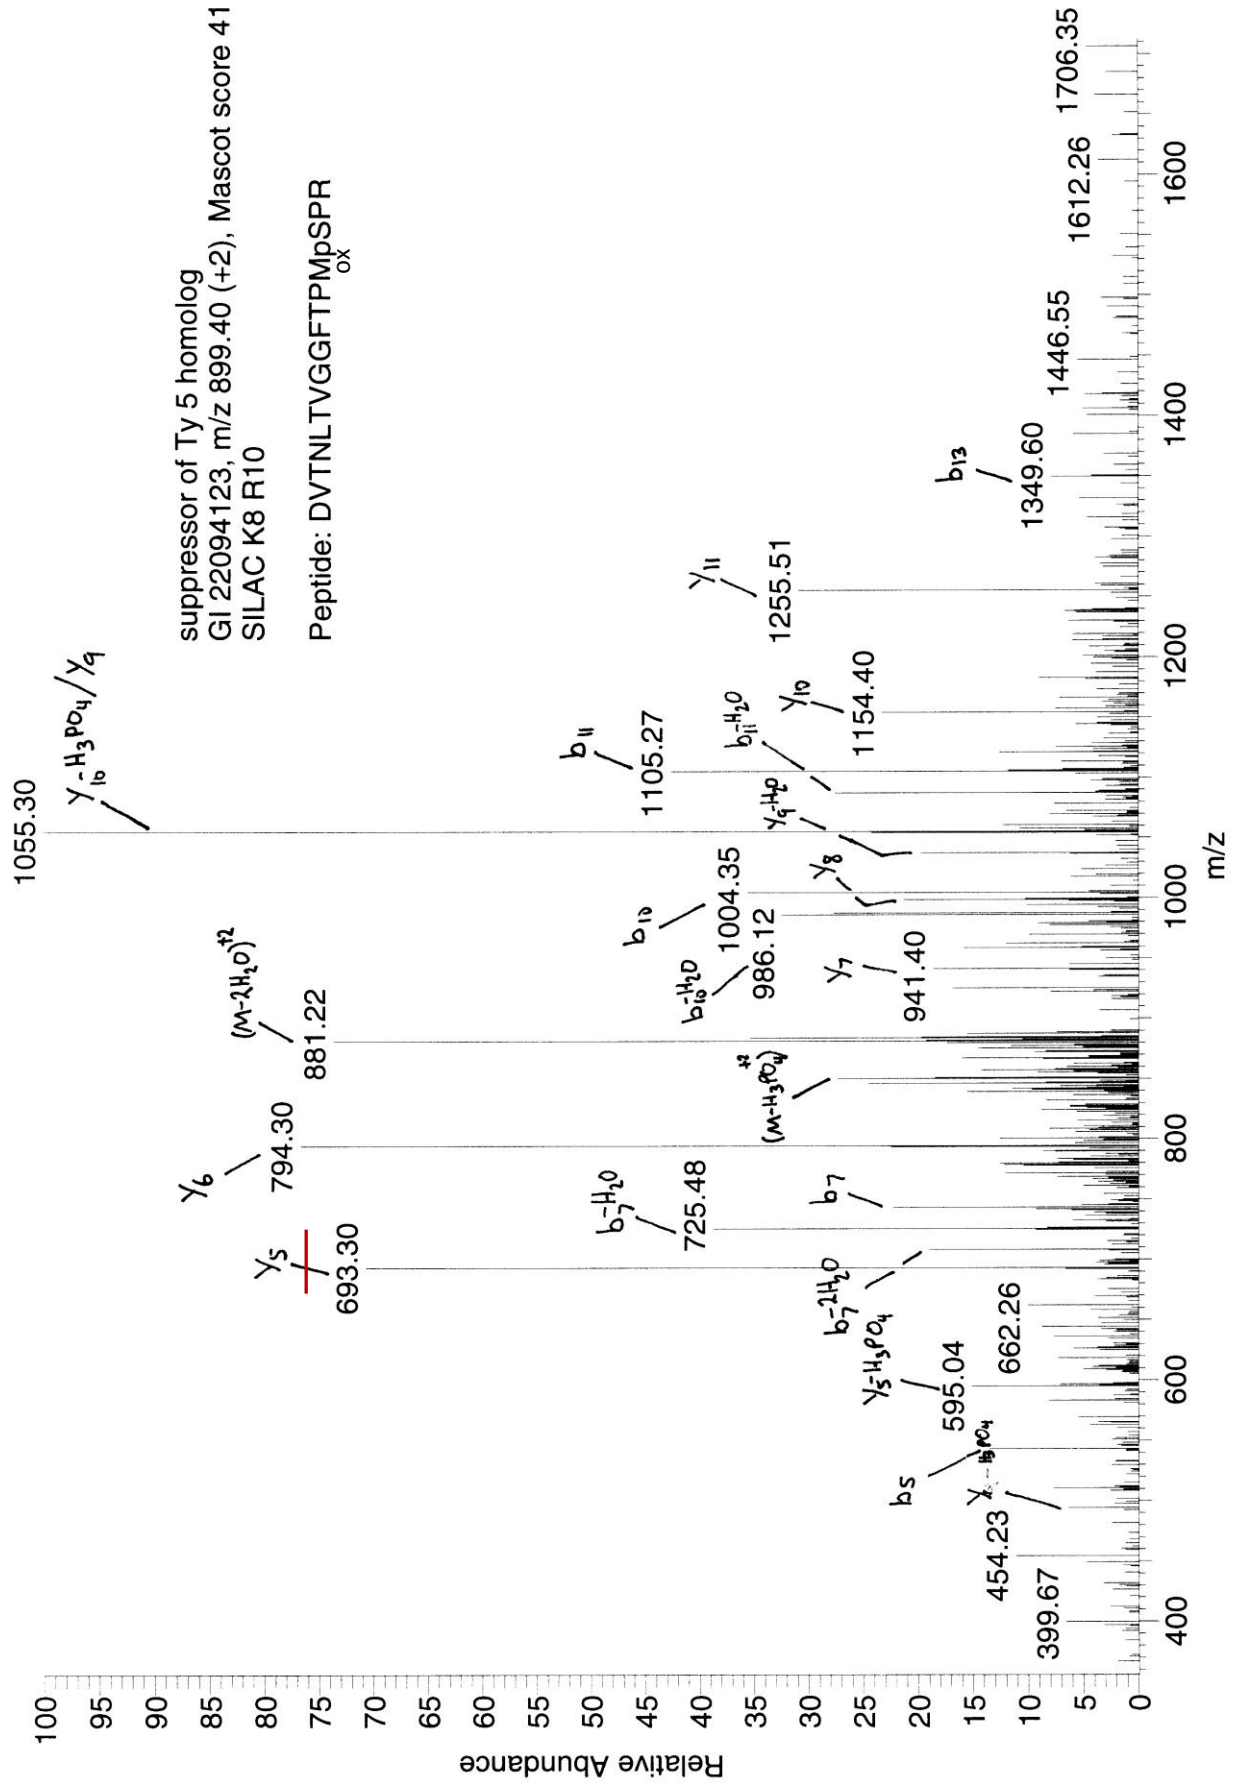

suppressor of Ty 5 homolog  
 GI 22094123, m/z 899.40 (+2), Mascot score 41  
 SILAC K8 R10

Peptide: DVTNLTVGGFTPMpSPR<sub>ox</sub>



suppressor of var1, 3-like 1  
GI 31088872, m/z 636.98 (+3), Mascot score 38  
SILAC K8 R10

Peptide: ATEPLpSPSDKELPLASR

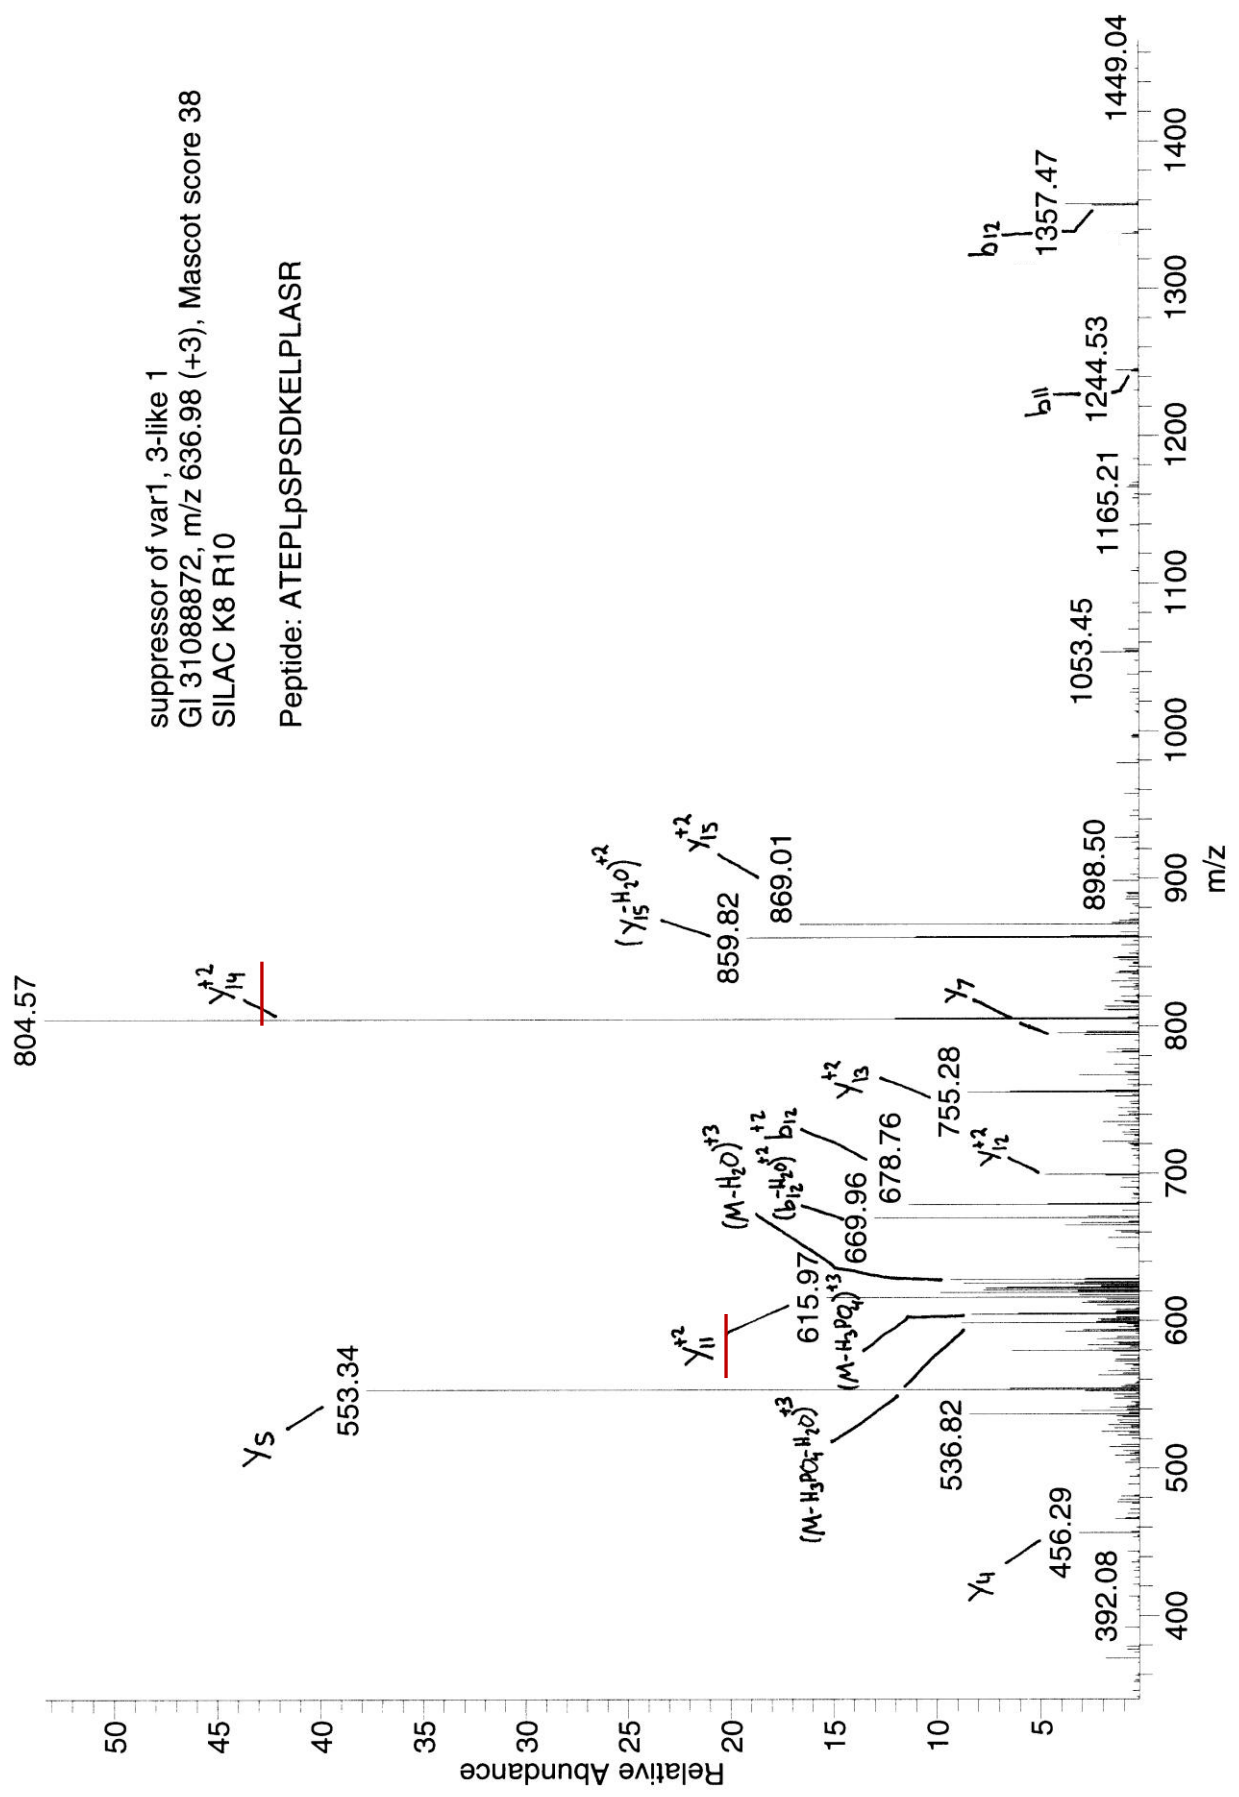



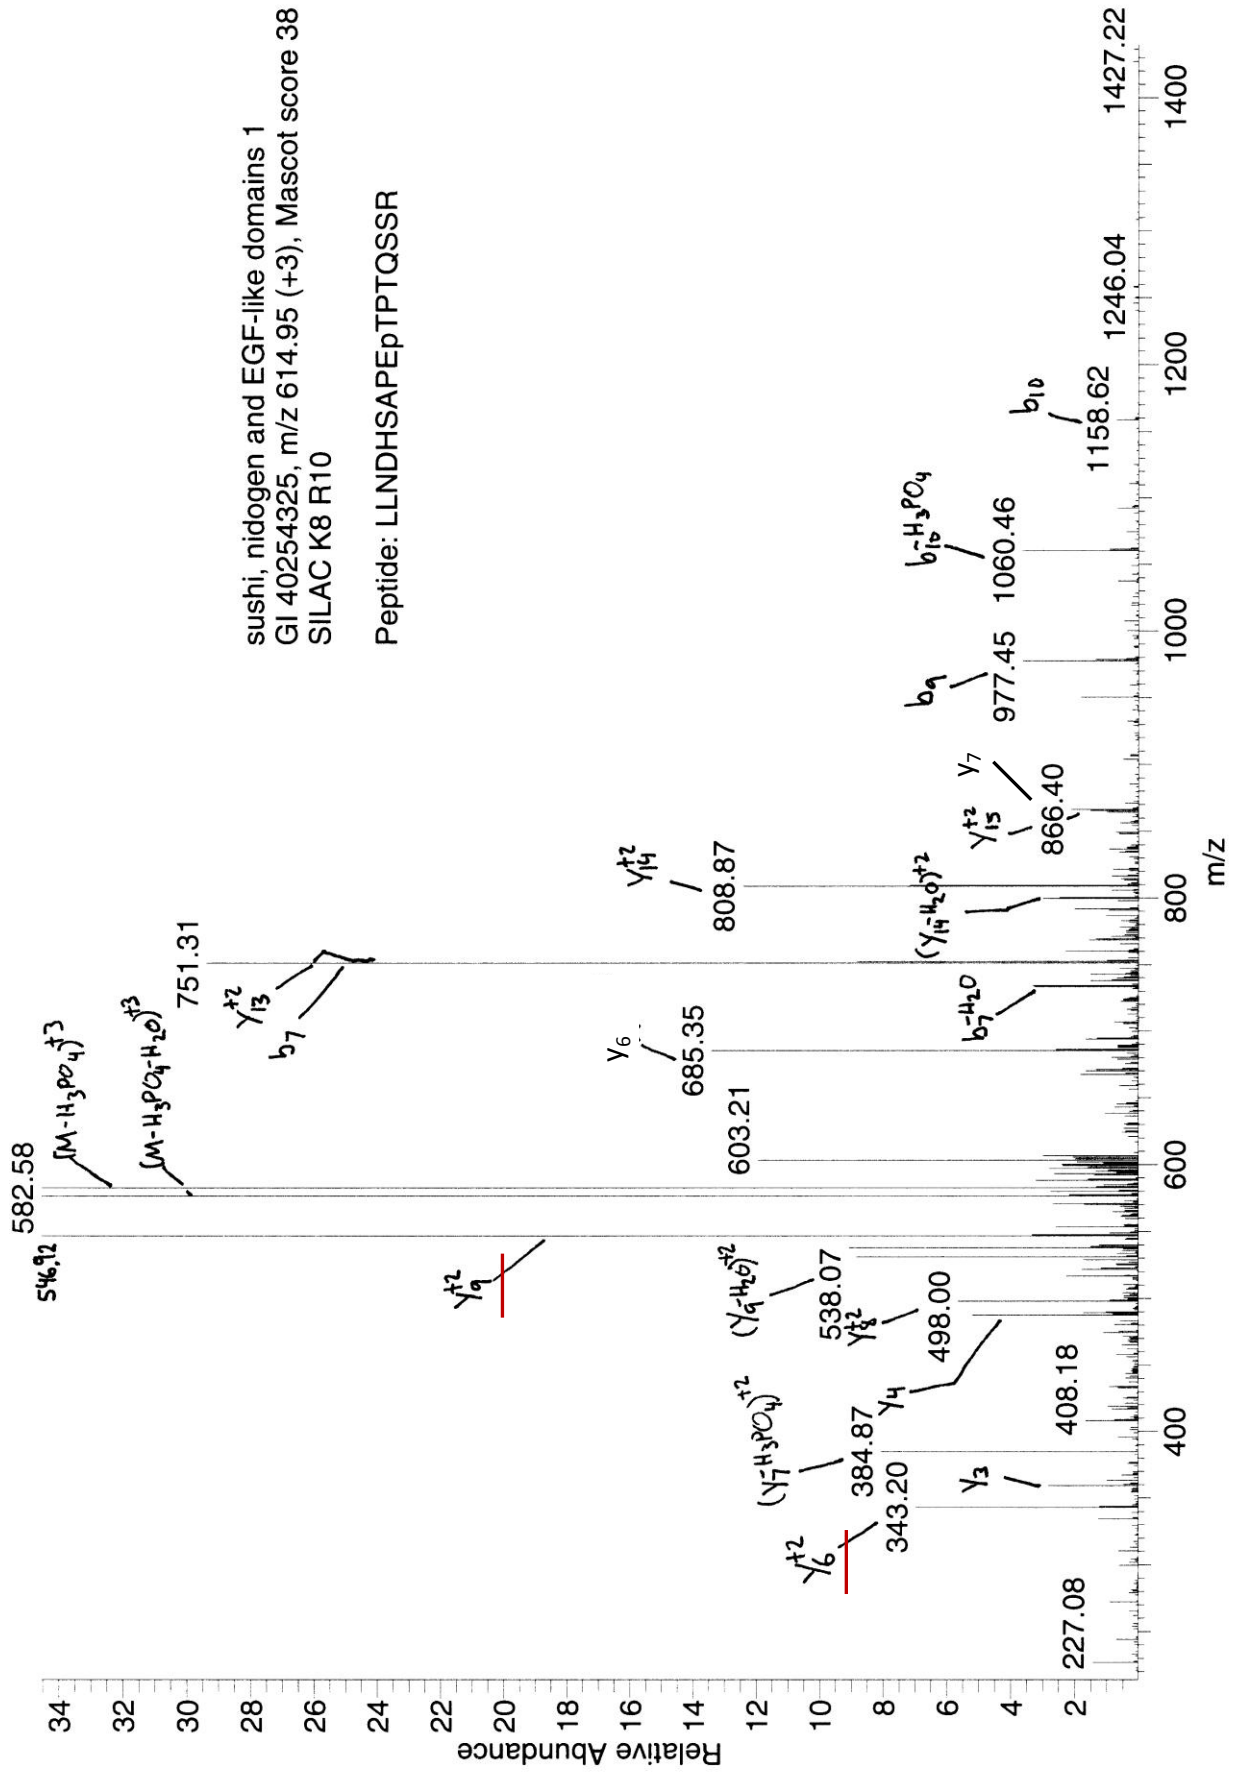

sushi, nidogen and EGF-like domains 1  
 GI 40254325, m/z 614.95 (+3), Mascot score 38  
 SILAC K8 R10

Peptide: LLNDHSAPEpTPTQSSR

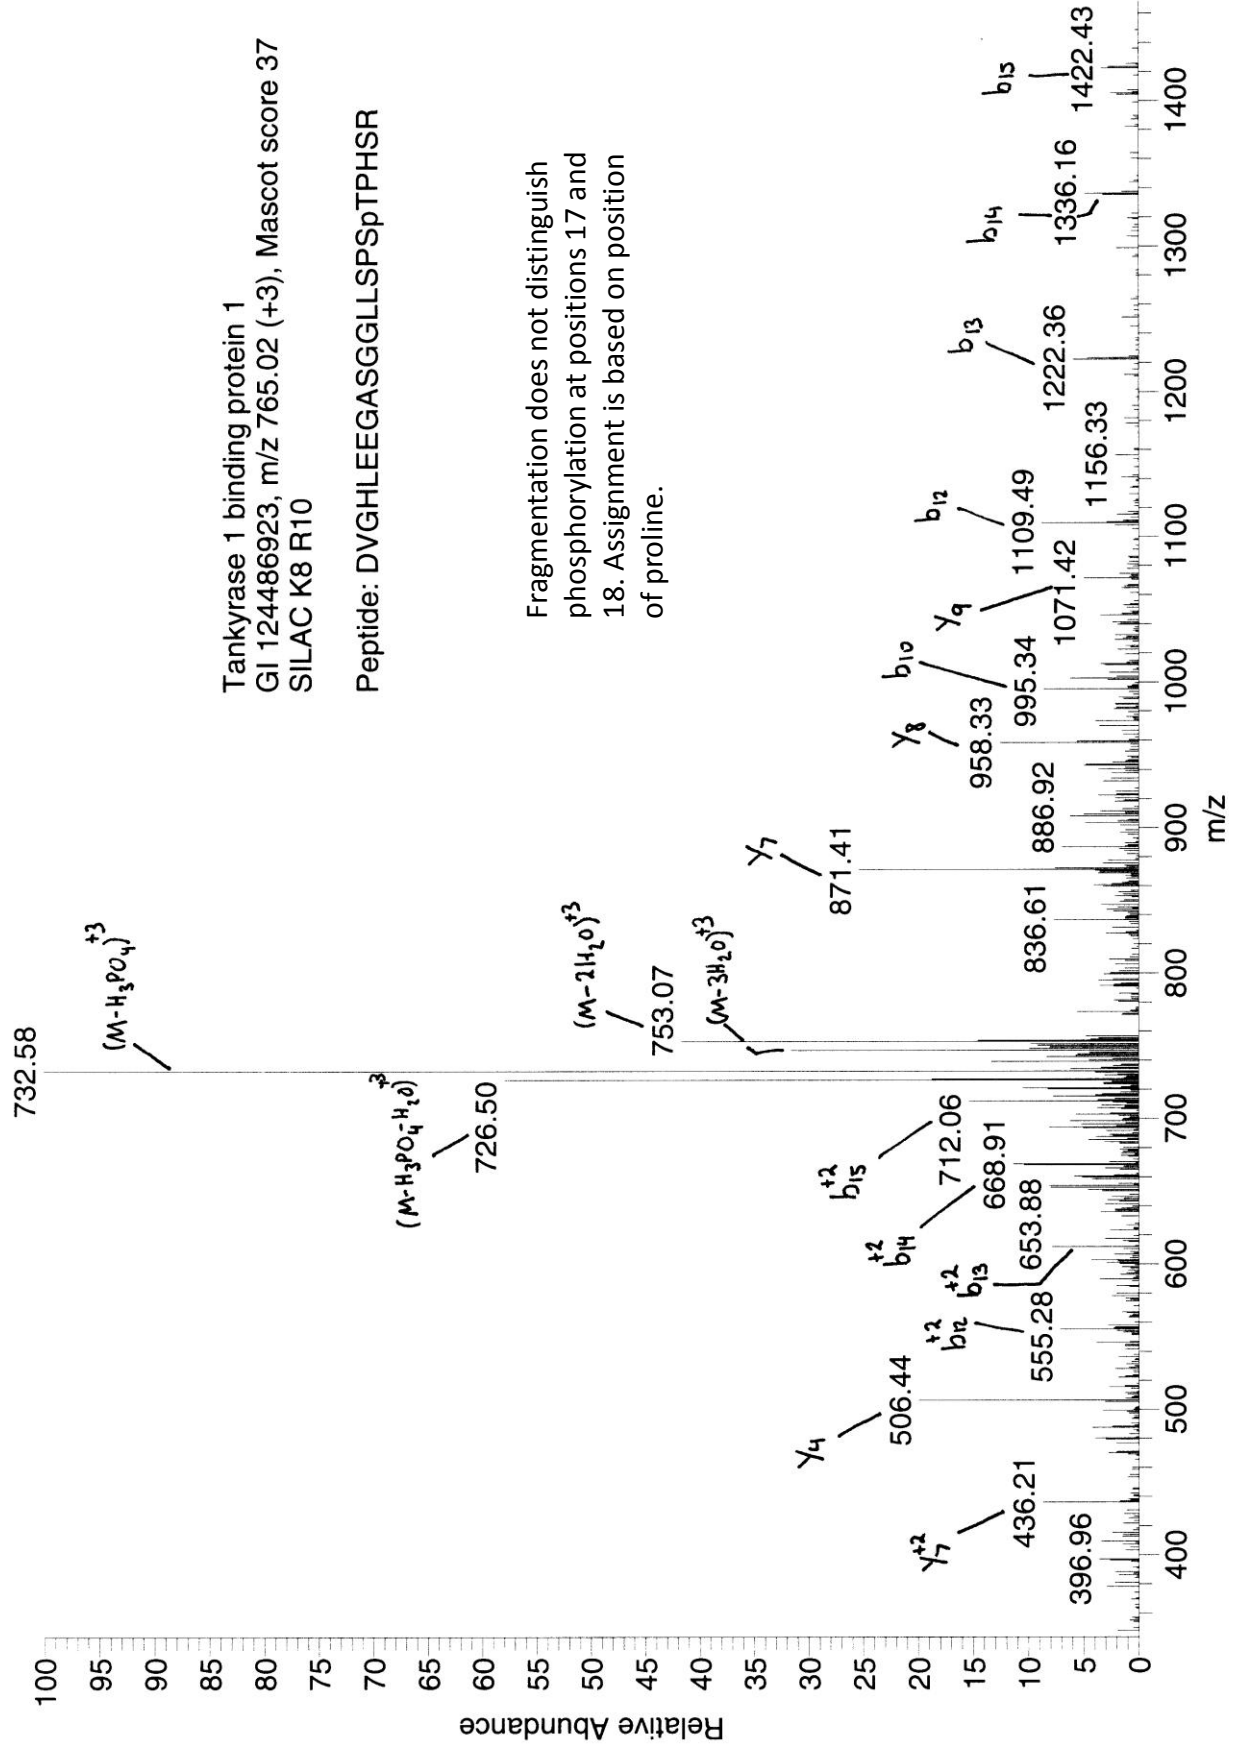

Tankyrase 1 binding protein 1  
 GI 124486923, m/z 765.02 (+3), Mascot score 37  
 SILAC K8 R10

Peptide: DVGHLEEGASGGLLSPSPTPHSR

Fragmentation does not distinguish phosphorylation at positions 17 and 18. Assignment is based on position of proline.

tankyrase 1 binding protein 1  
GI 124486923, m/z 599.97 (+3), Mascot score 37  
SILAC K6 R6

Peptide: EDAGKEDLPLpTPPAR

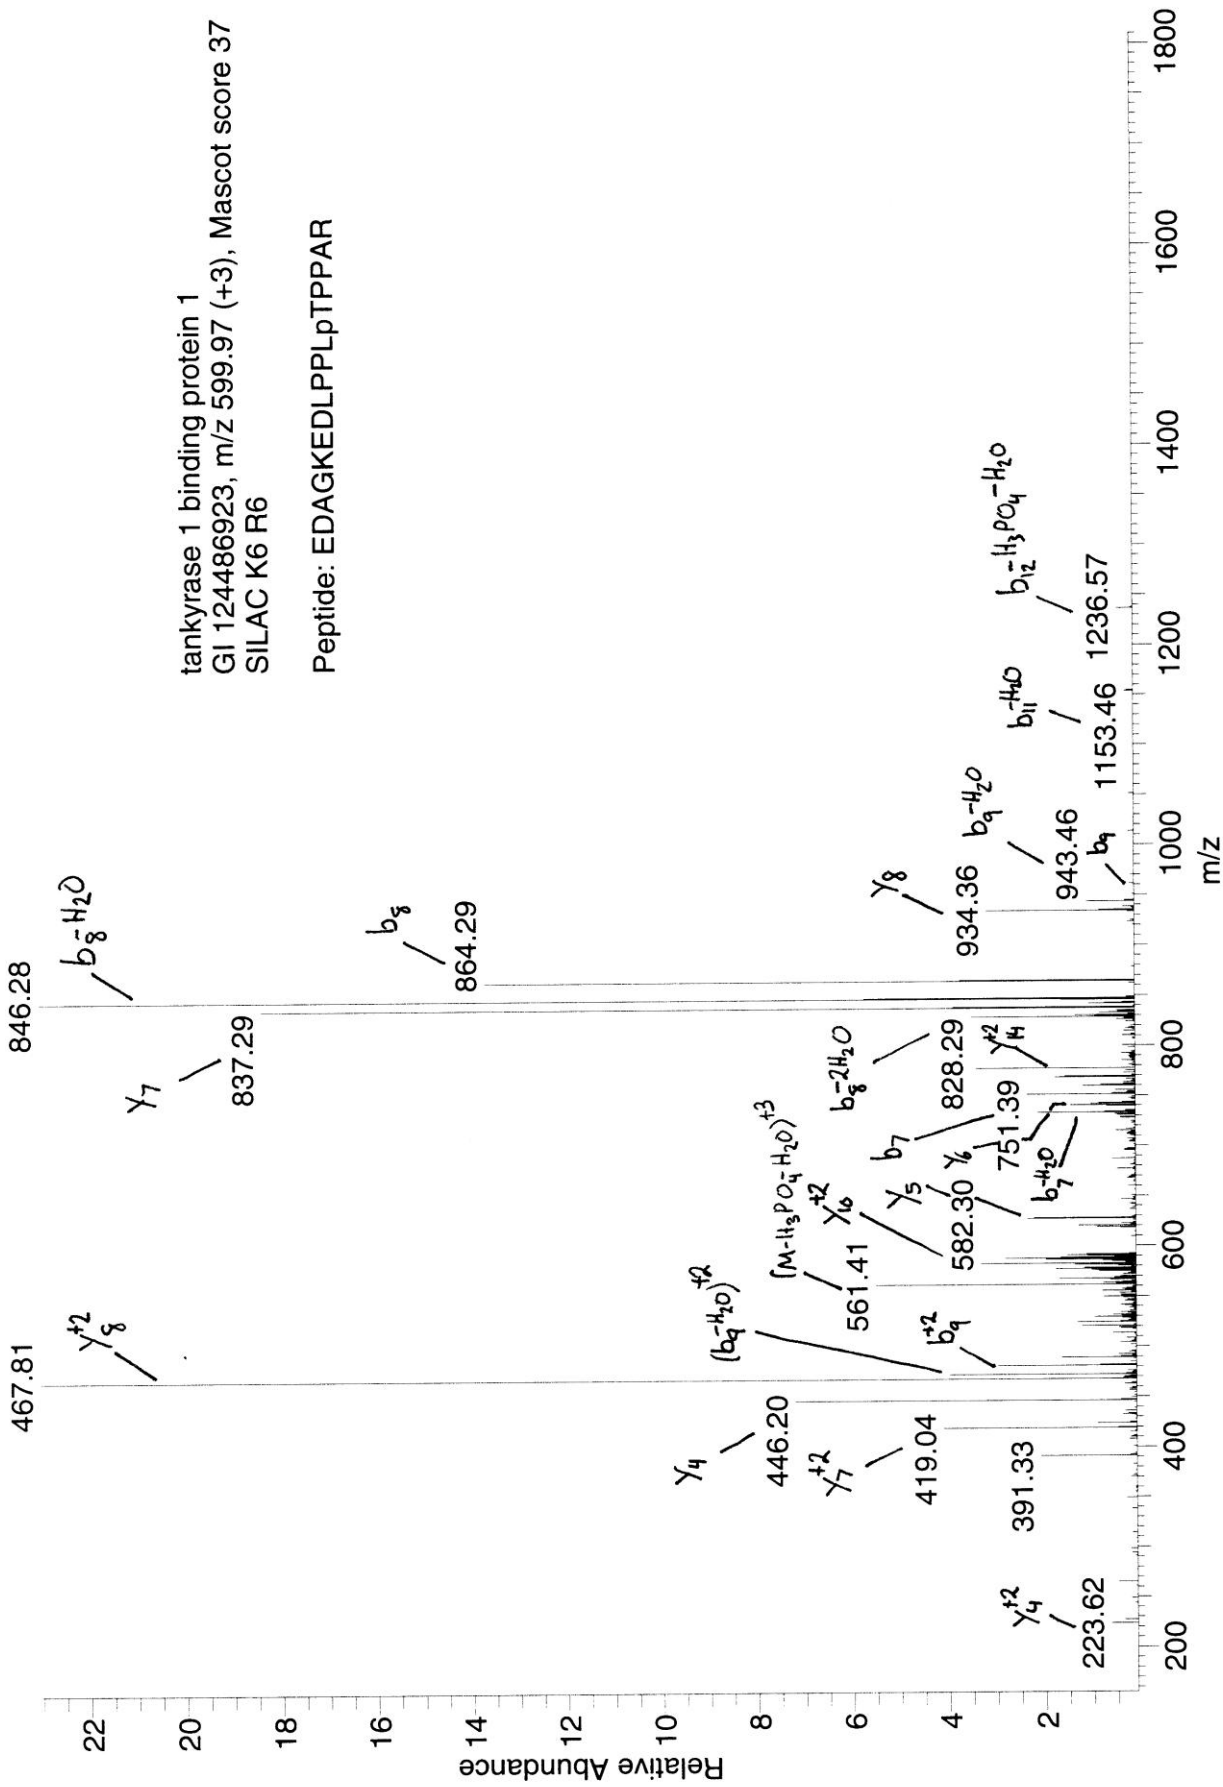

496.34

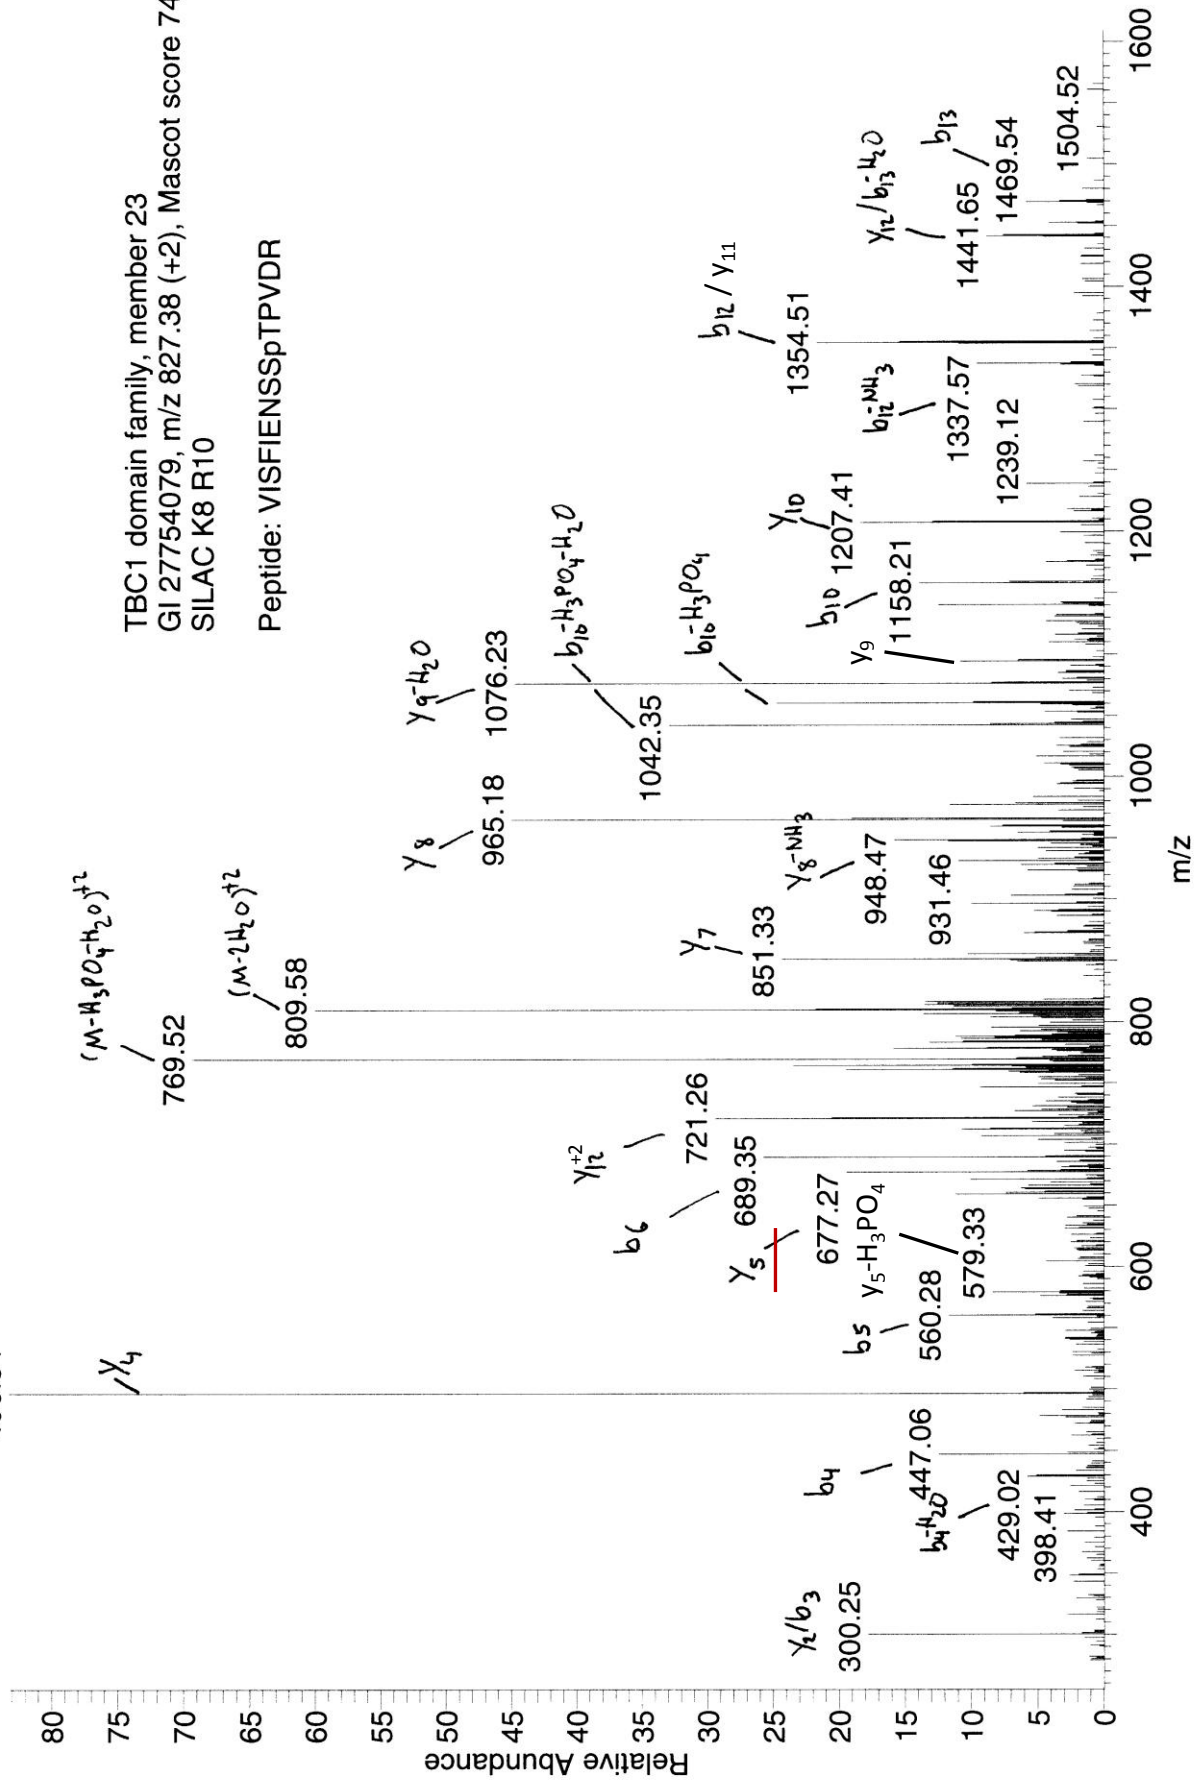

TBC1 domain family, member 23  
GI 27754079, m/z 827.38 (+2), Mascot score 74  
SILAC K8 R10

Peptide: VISFIENSSpTPVDR

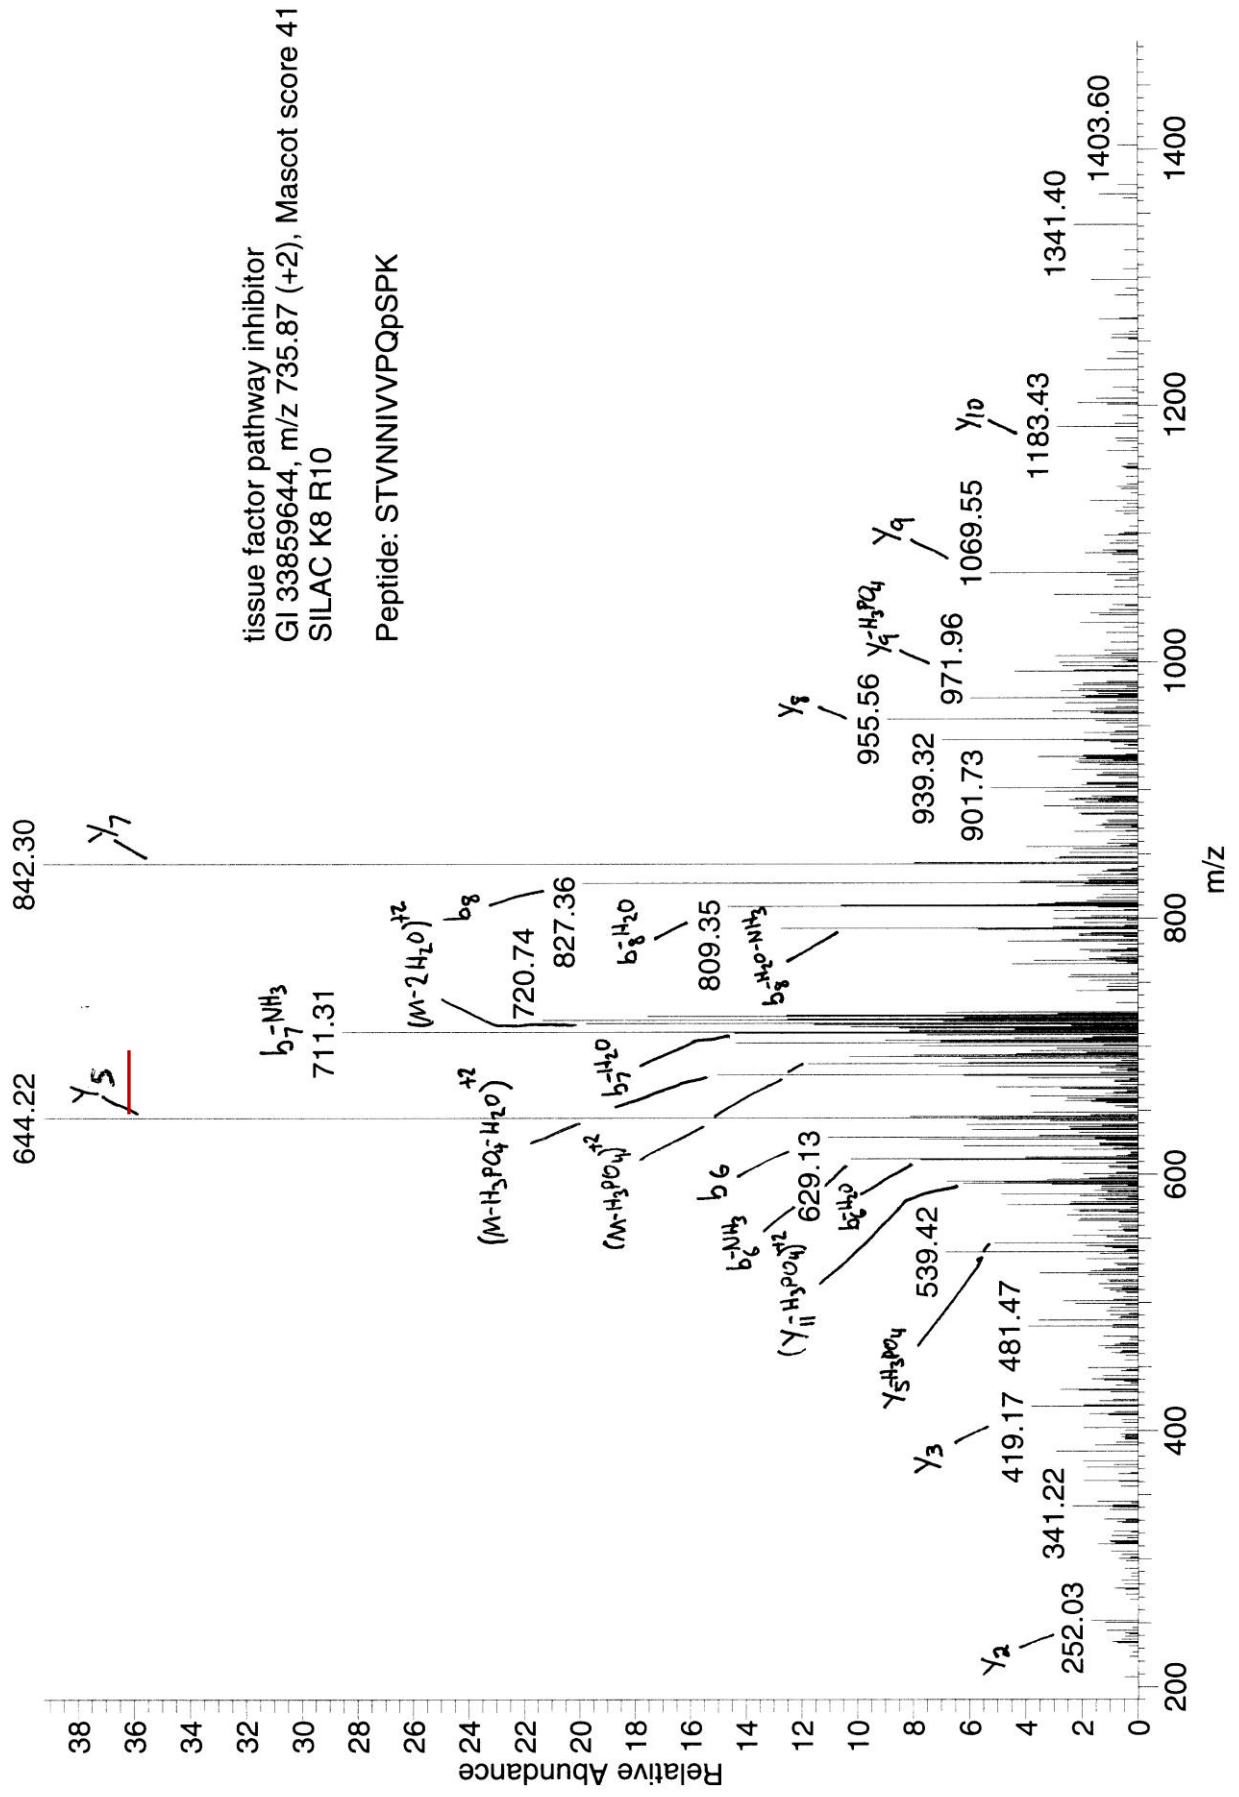

tissue factor pathway inhibitor  
 GI 33859644, m/z 735.87 (+2), Mascot score 41  
 SILAC K8 R10

Peptide: STVNNIVVPQpSPK

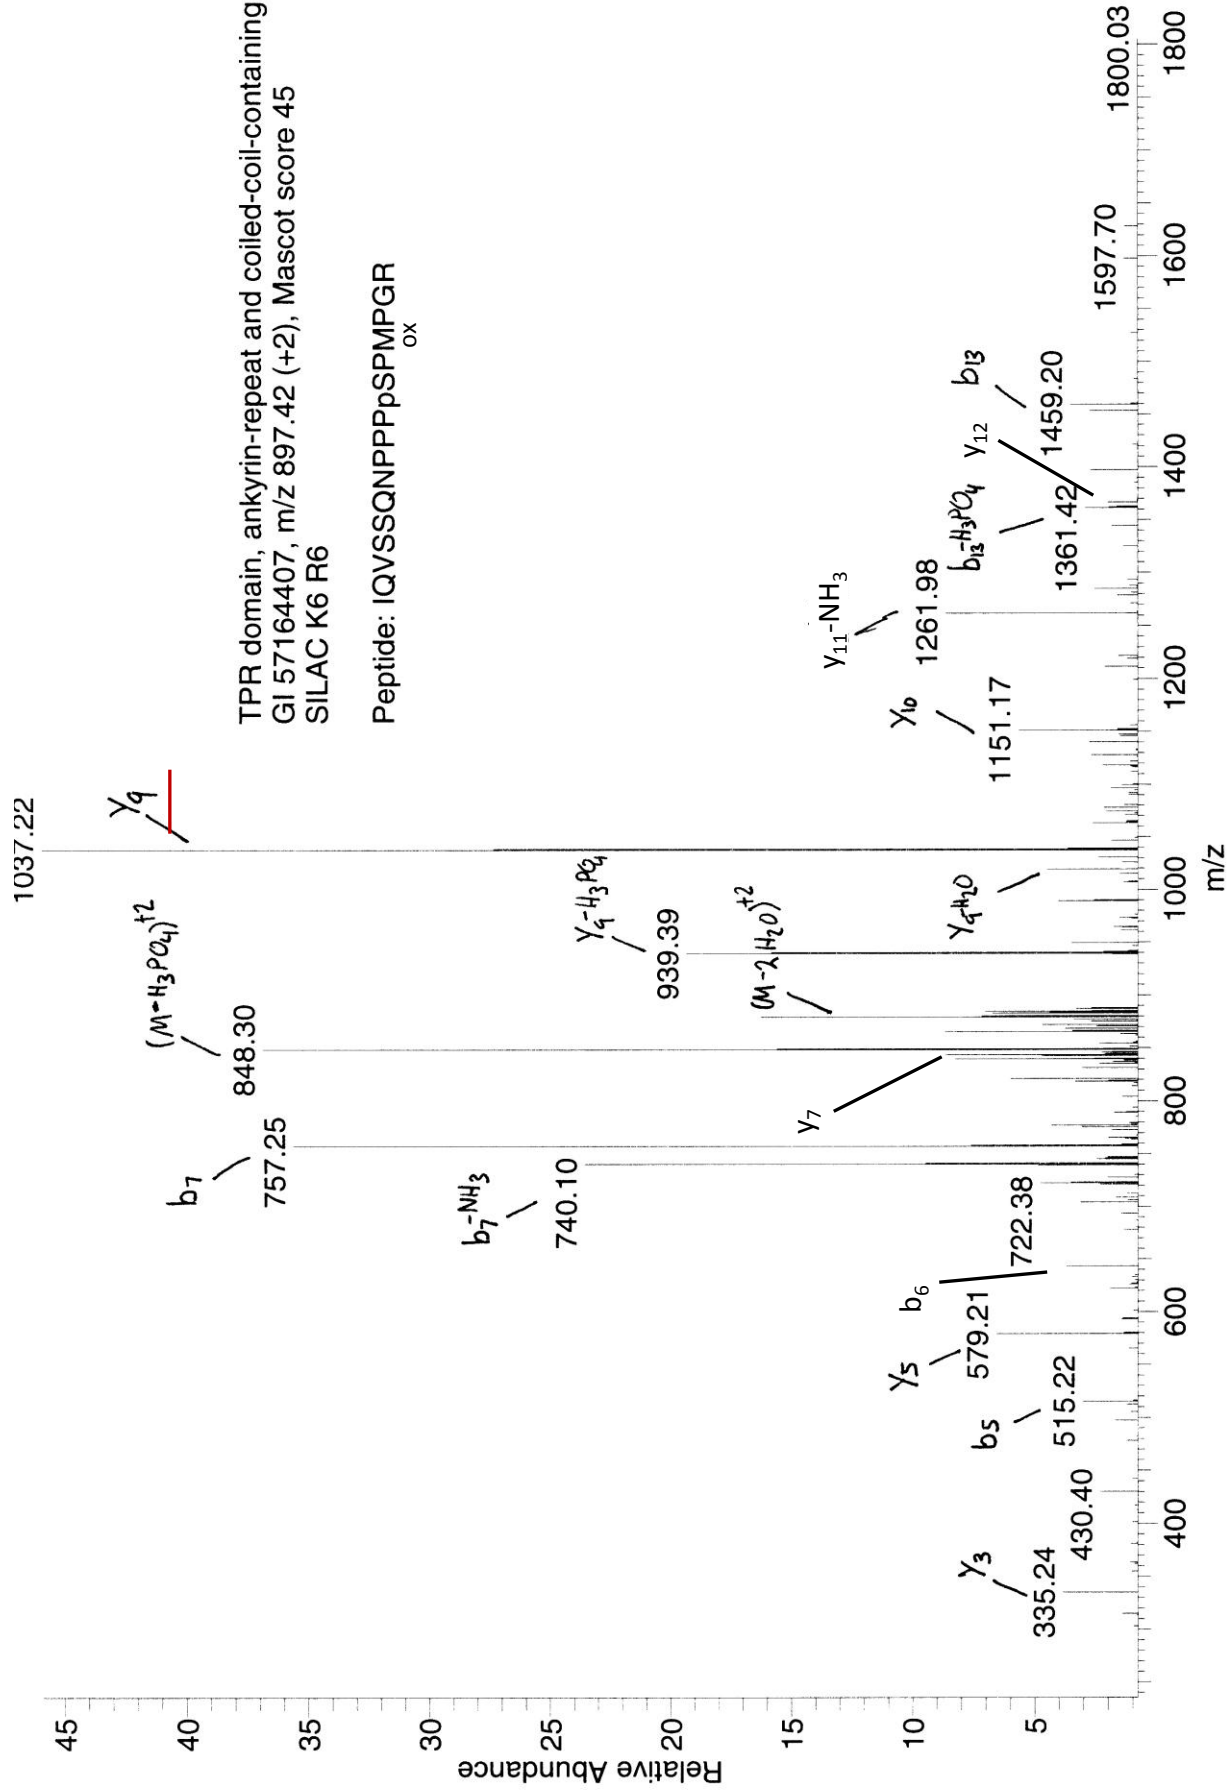

TPR domain, ankyrin-repeat and coiled-coil-containing  
 GI 57164407, m/z 897.42 (+2), Mascot score 45  
 SILAC K6 R6

Peptide: IQVSSQNPPPPpSPMPGR<sub>ox</sub>

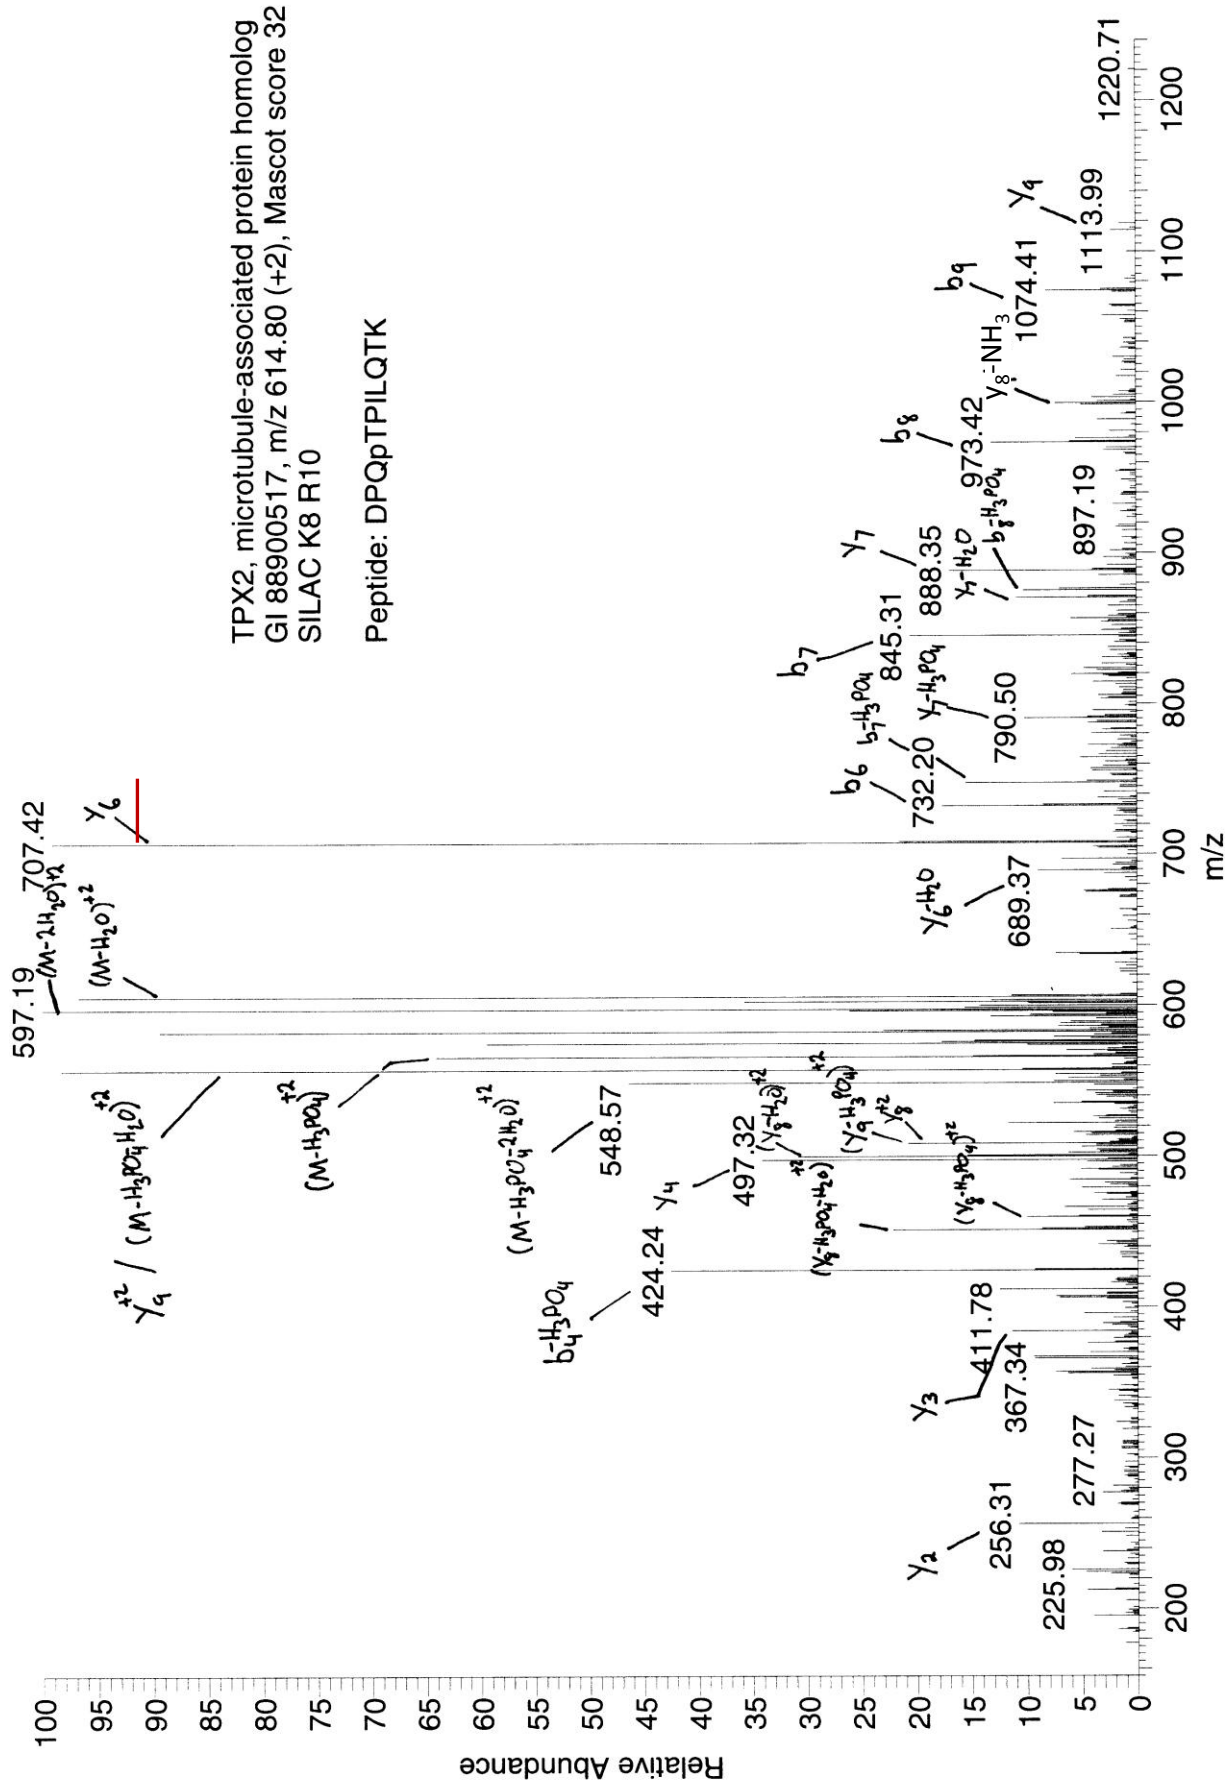

TPX2, microtubule-associated protein homolog  
 GI 88900517, m/z 614.80 (+2), Mascot score 32  
 SILAC K8 R10

Peptide: DPQpTPILQTK



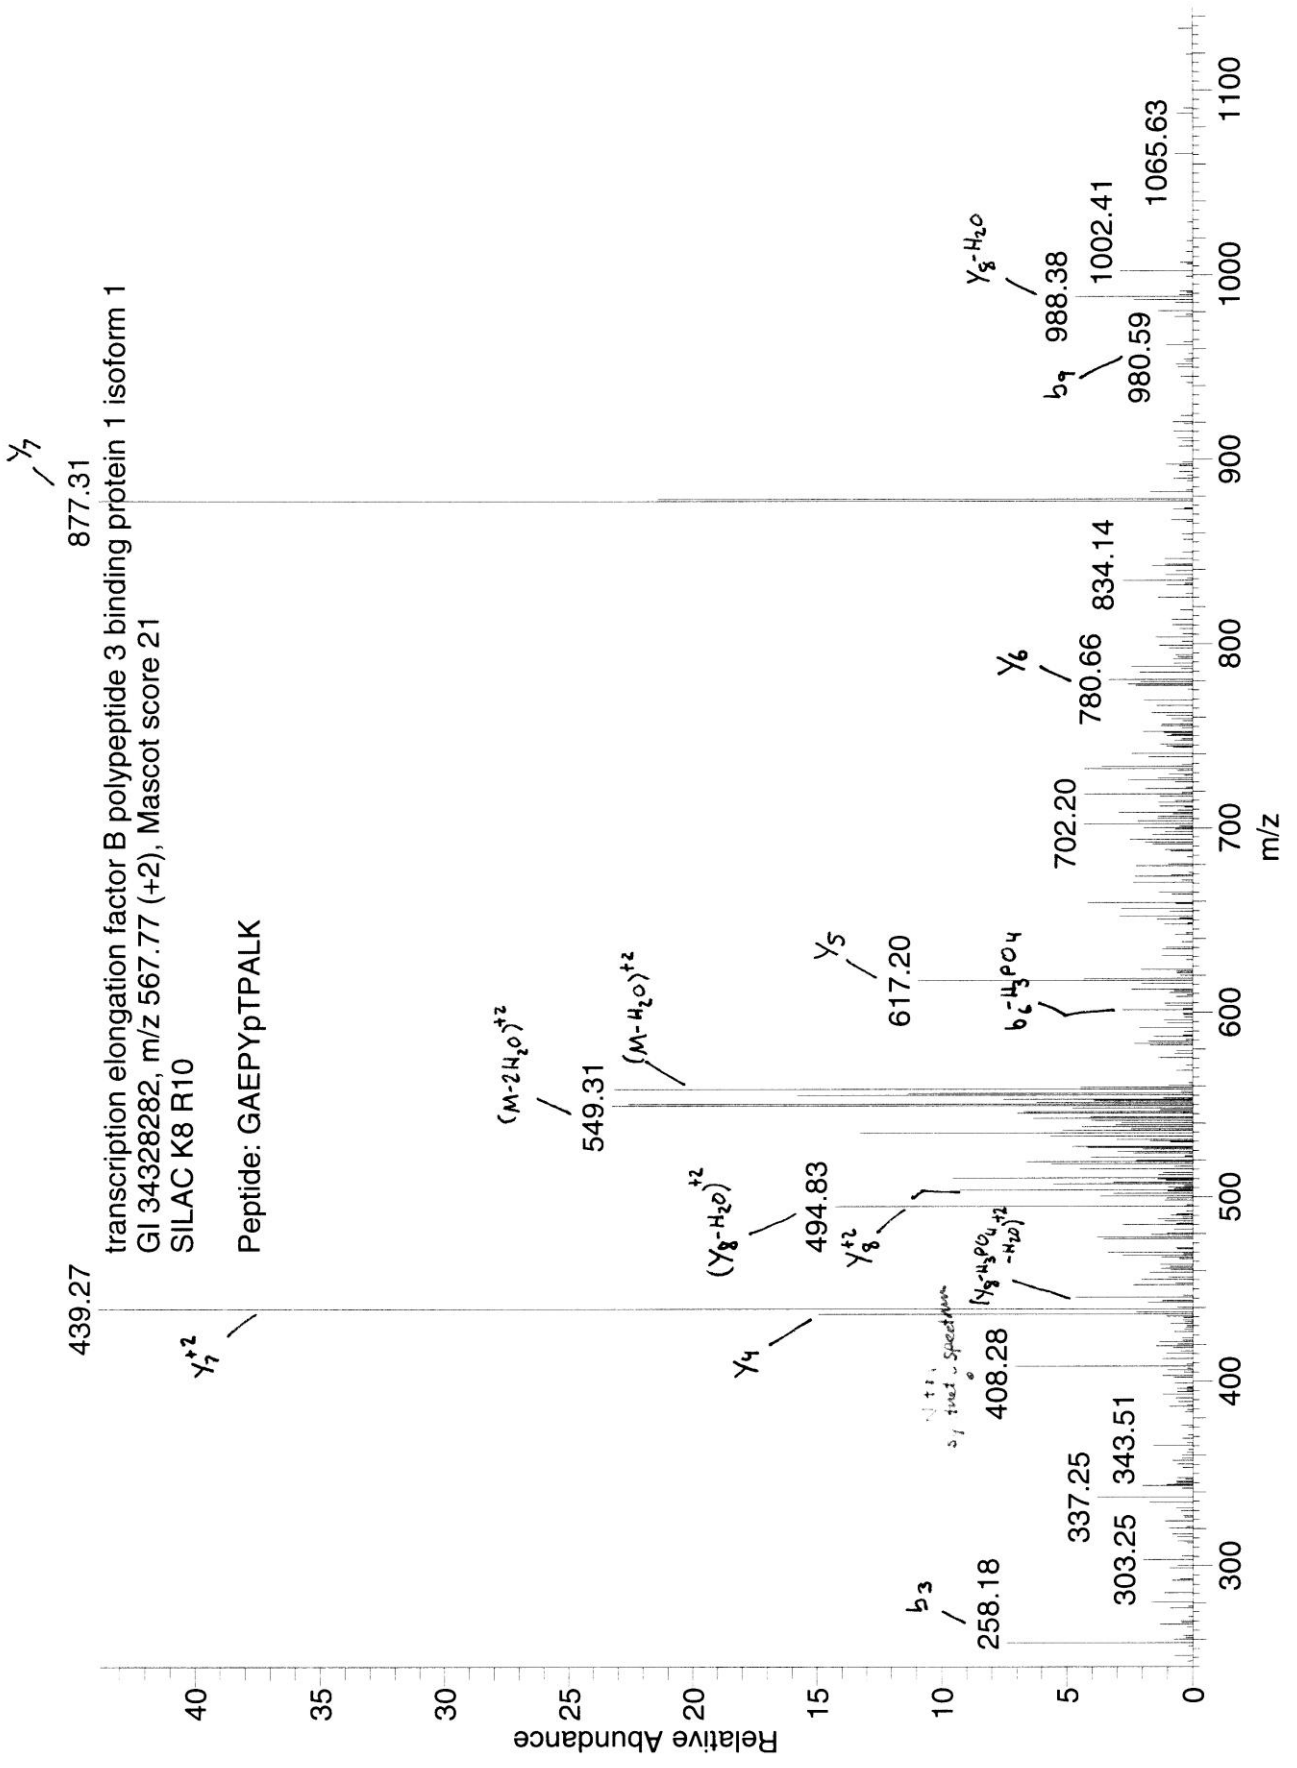

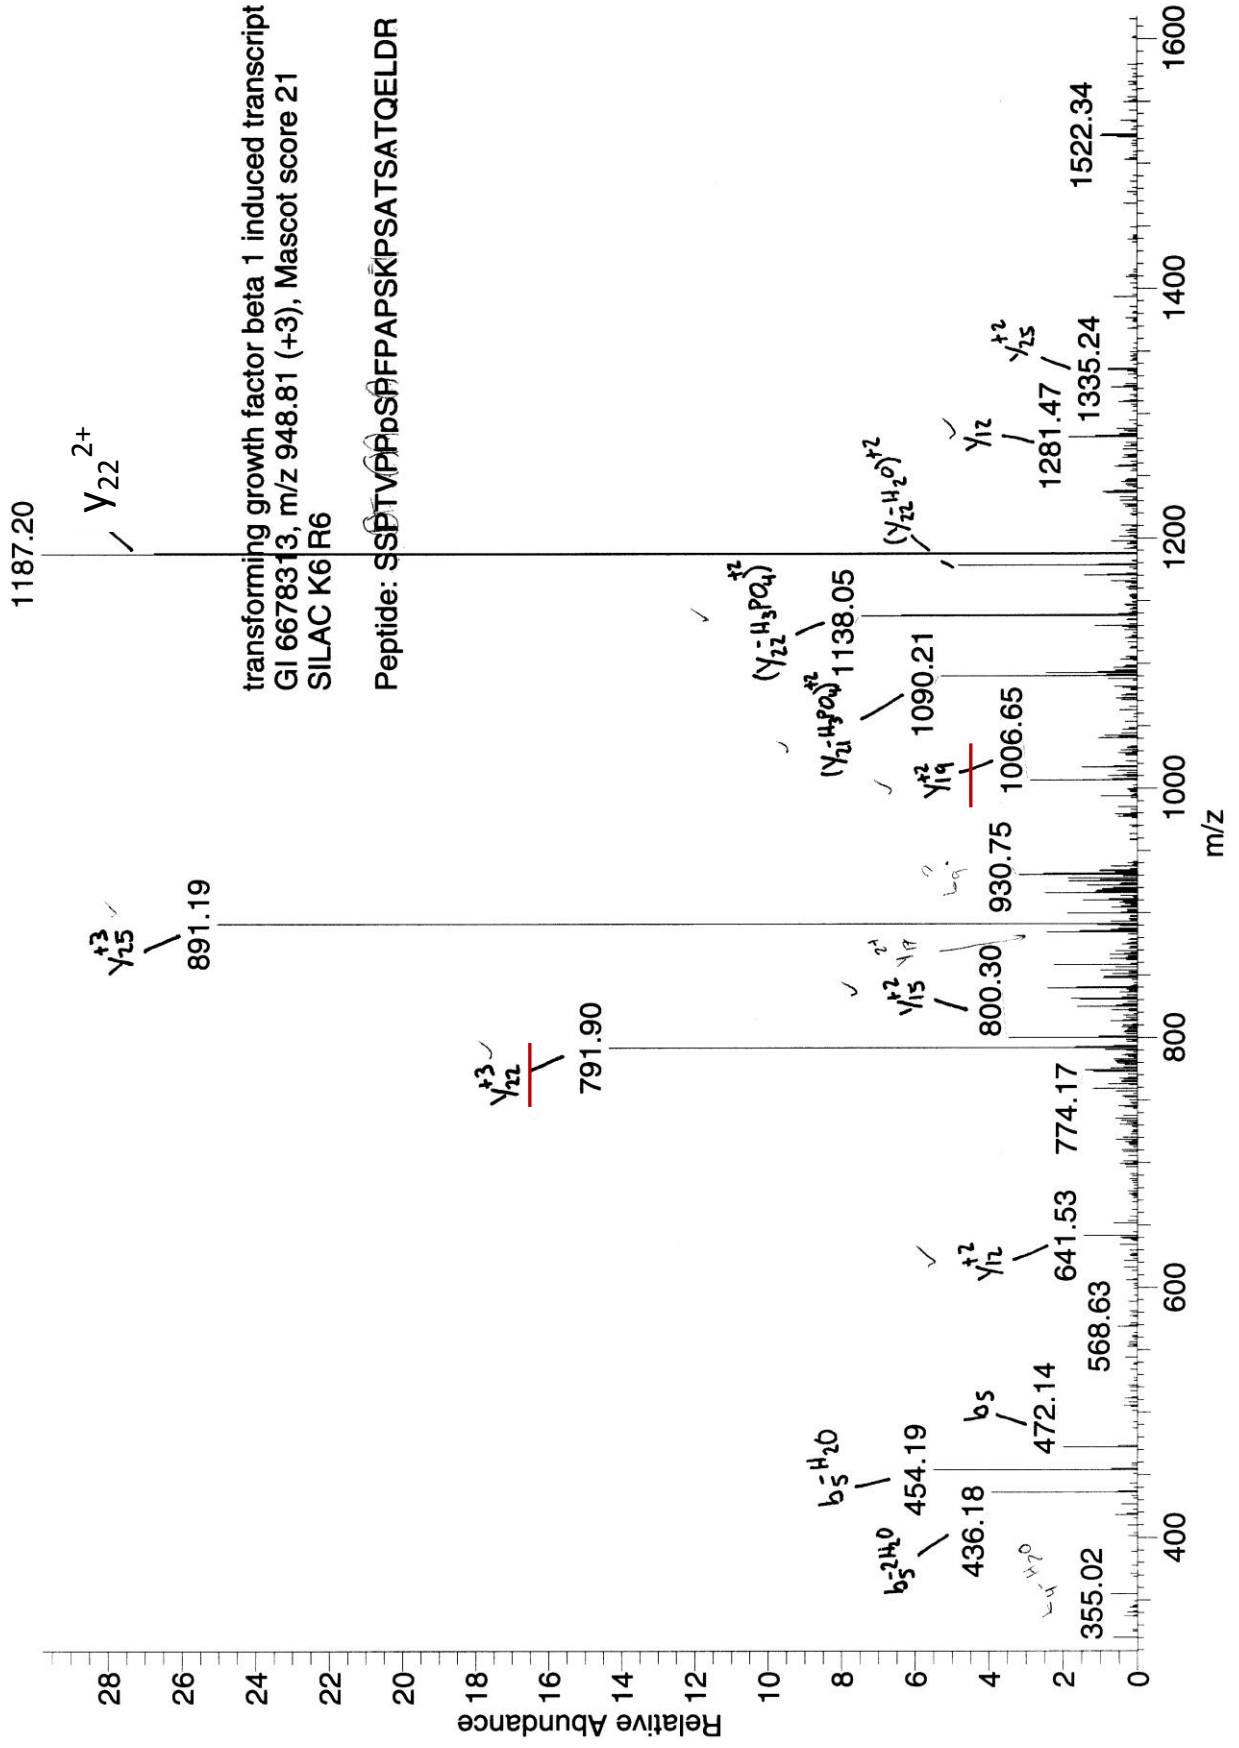

transforming growth factor beta 1 induced transcript 1  
 GI 6678313, m/z 948.81 (+3), Mascot score 21  
 SILAC K6 R6

Peptide: ~~S~~P~~T~~V~~P~~P~~P~~P~~P~~P~~P~~A~~P~~S~~P~~K~~P~~S~~A~~T~~S~~A~~T~~Q~~E~~L~~D~~R

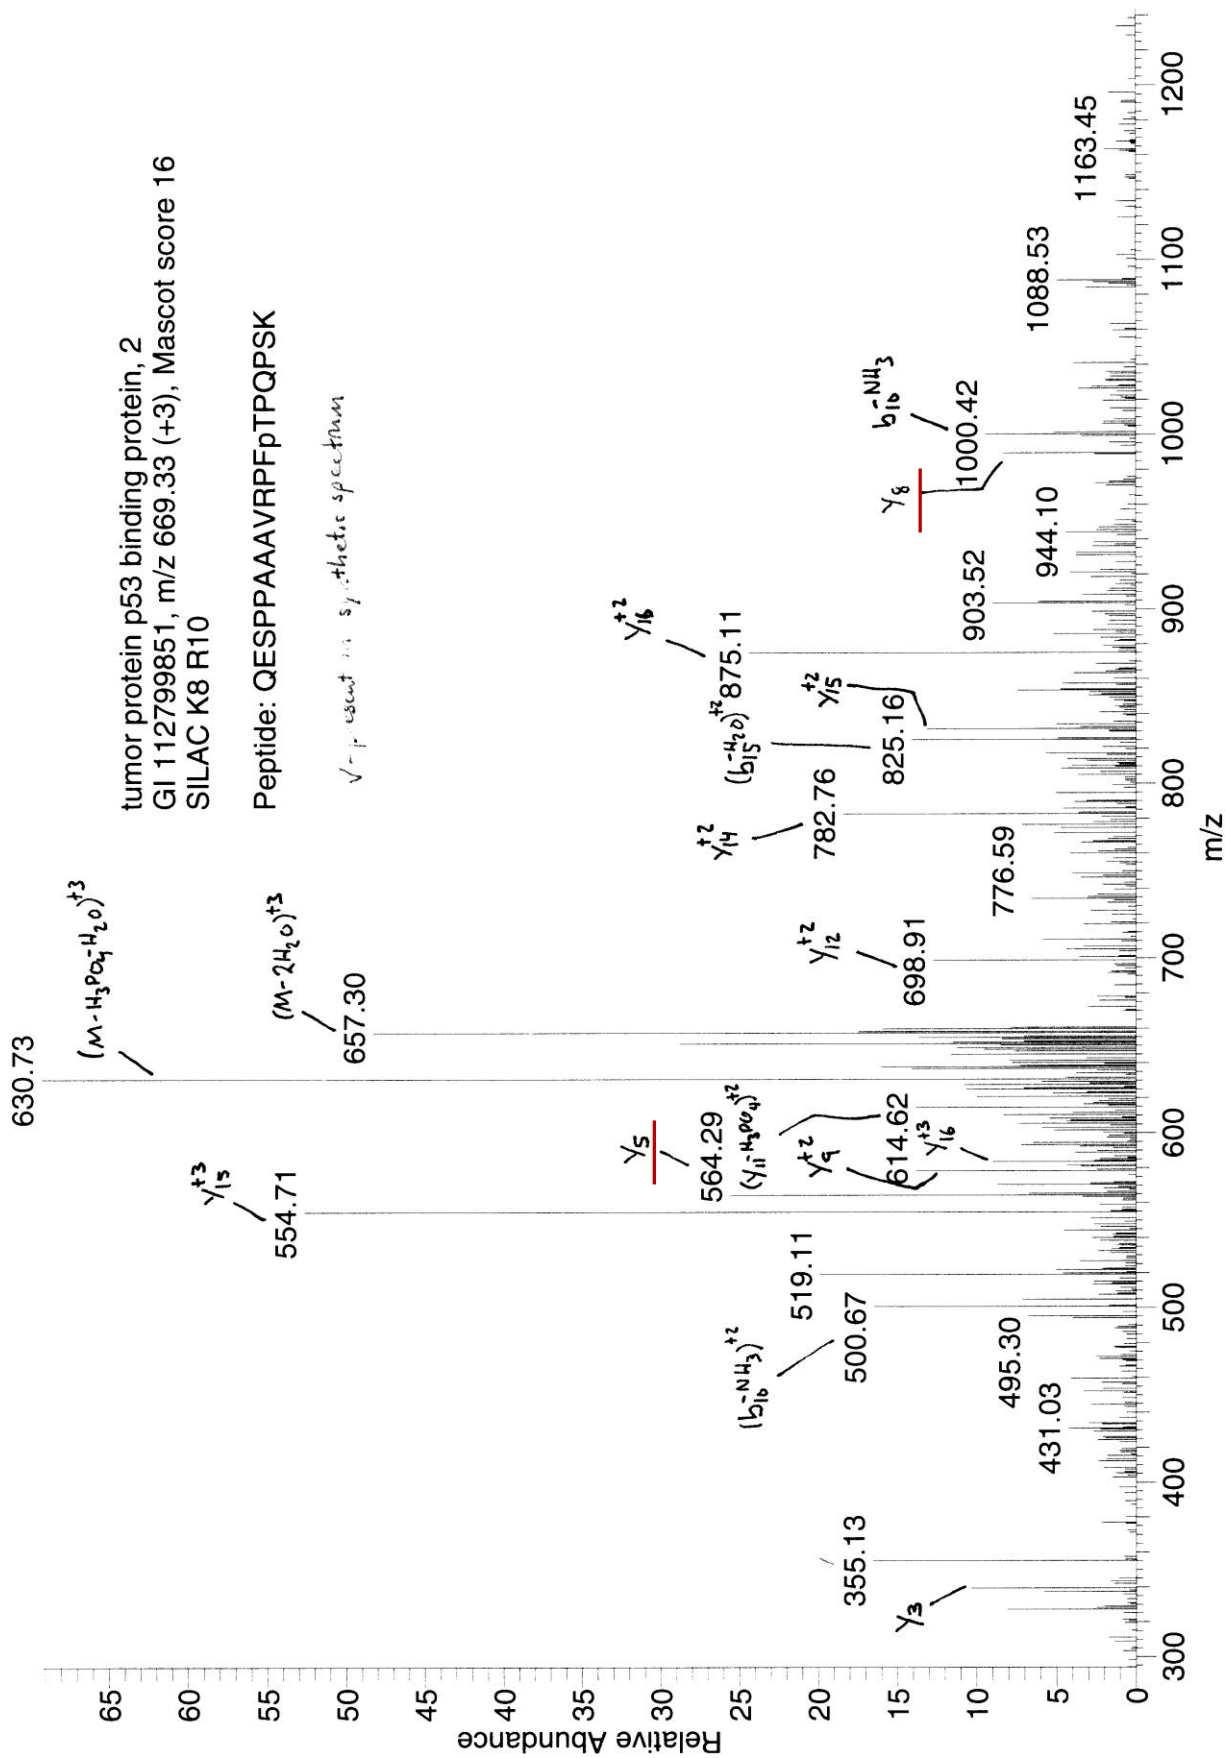

tumor protein p53 binding protein, 2  
 GI 11279851, m/z 669.33 (+3), Mascot score 16  
 SILAC K8 R10

Peptide: QESPAAAVRPFpTPQPSK

*✓ - p-escut in synthetic spectrum*

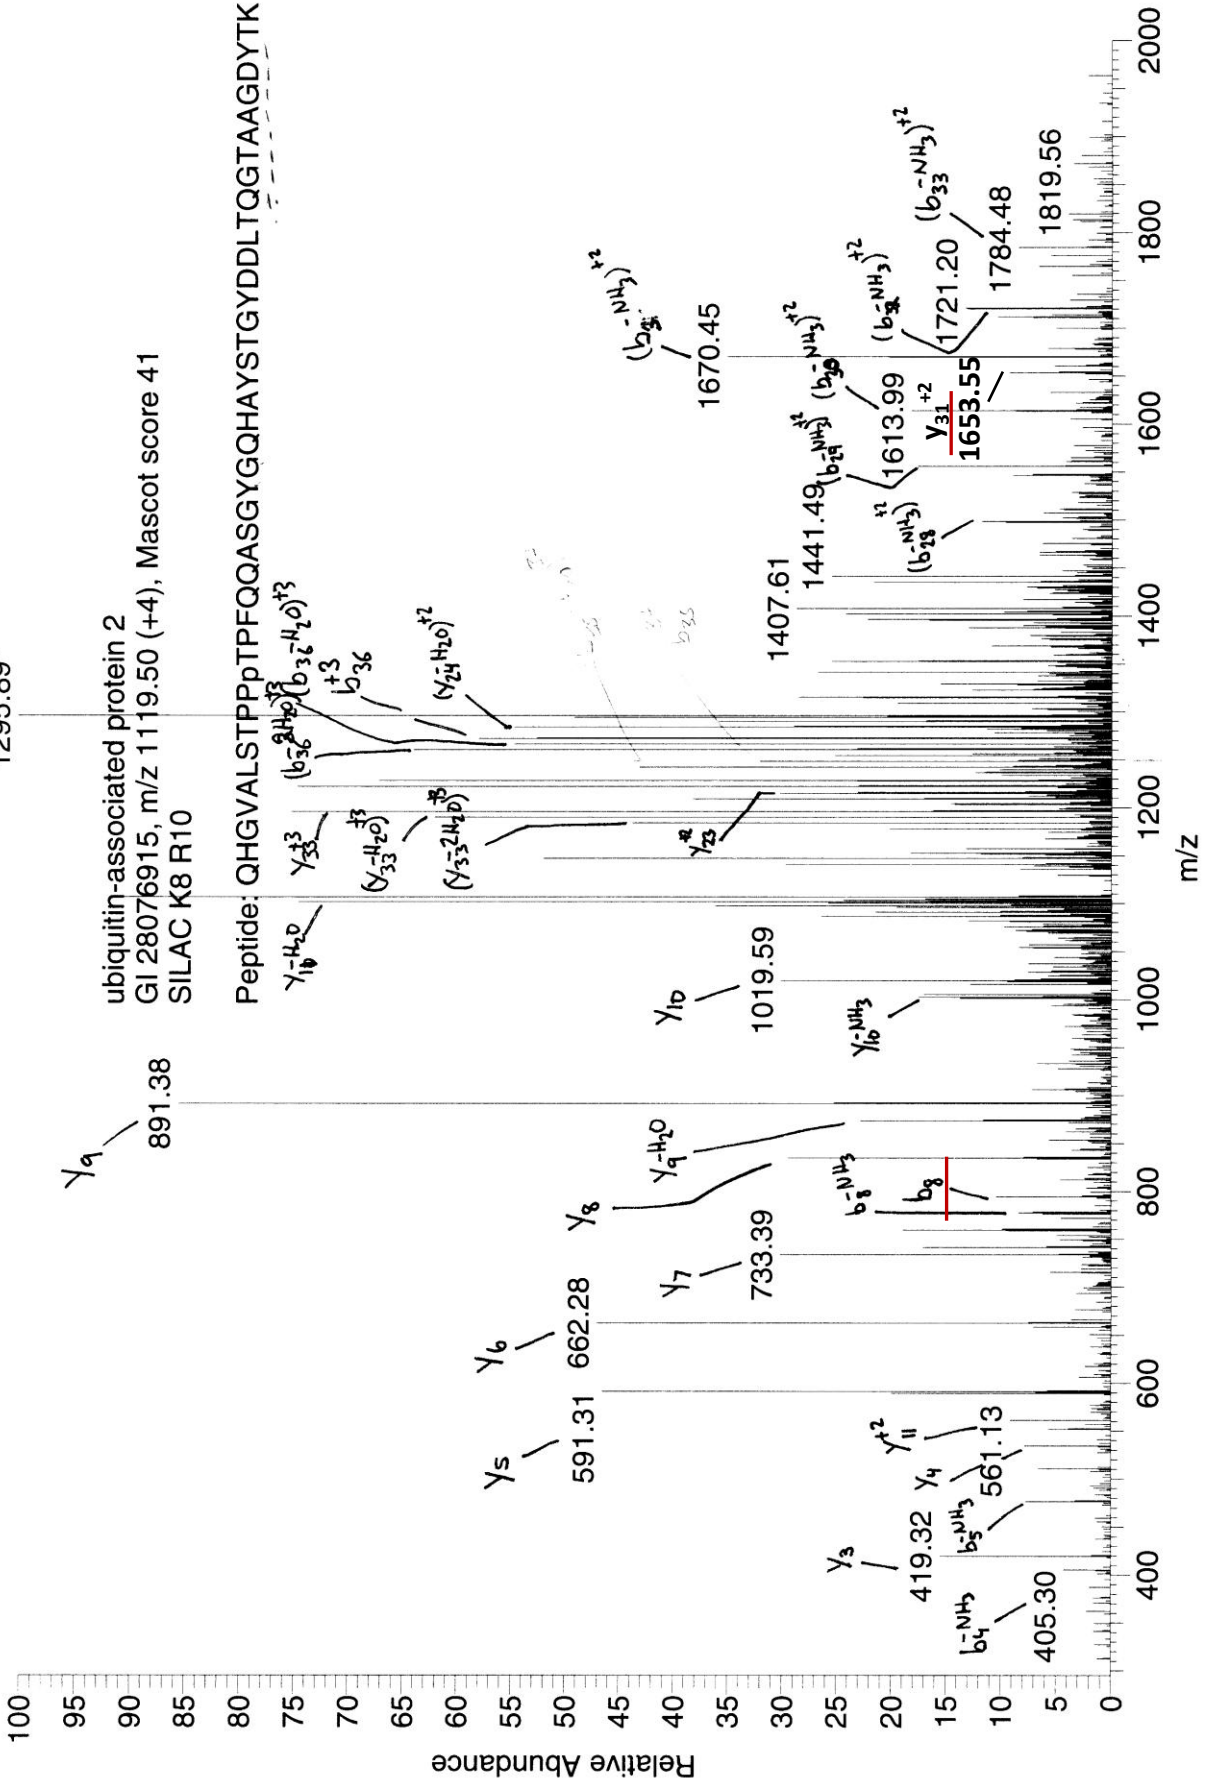

1374.67  $\gamma_{12}$

ubiquitin-associated protein 2-like  
GI 23271826, m/z 1187.08 (+2), Mascot score 80  
SILAC K8 R10

Peptide: FPLDYYSIPFFPTpTPLTGR

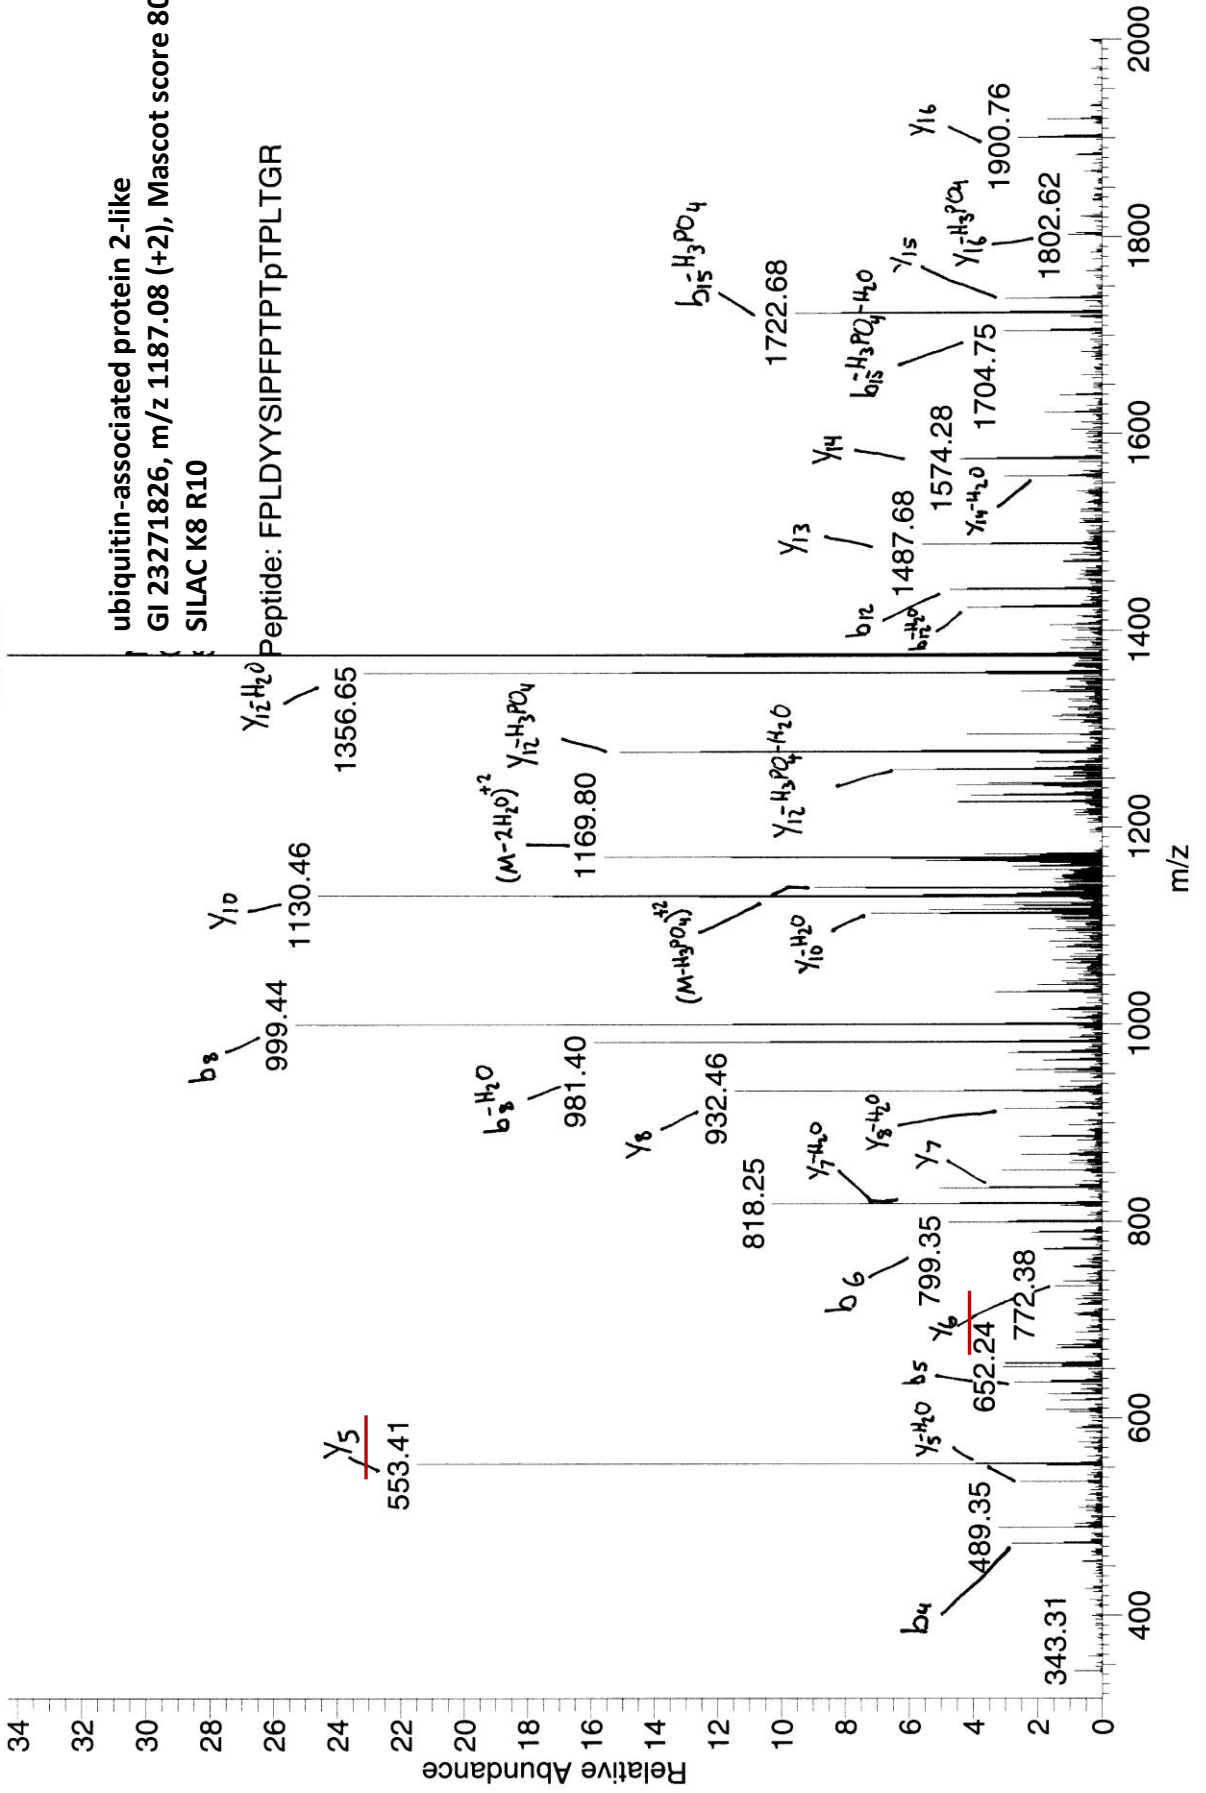

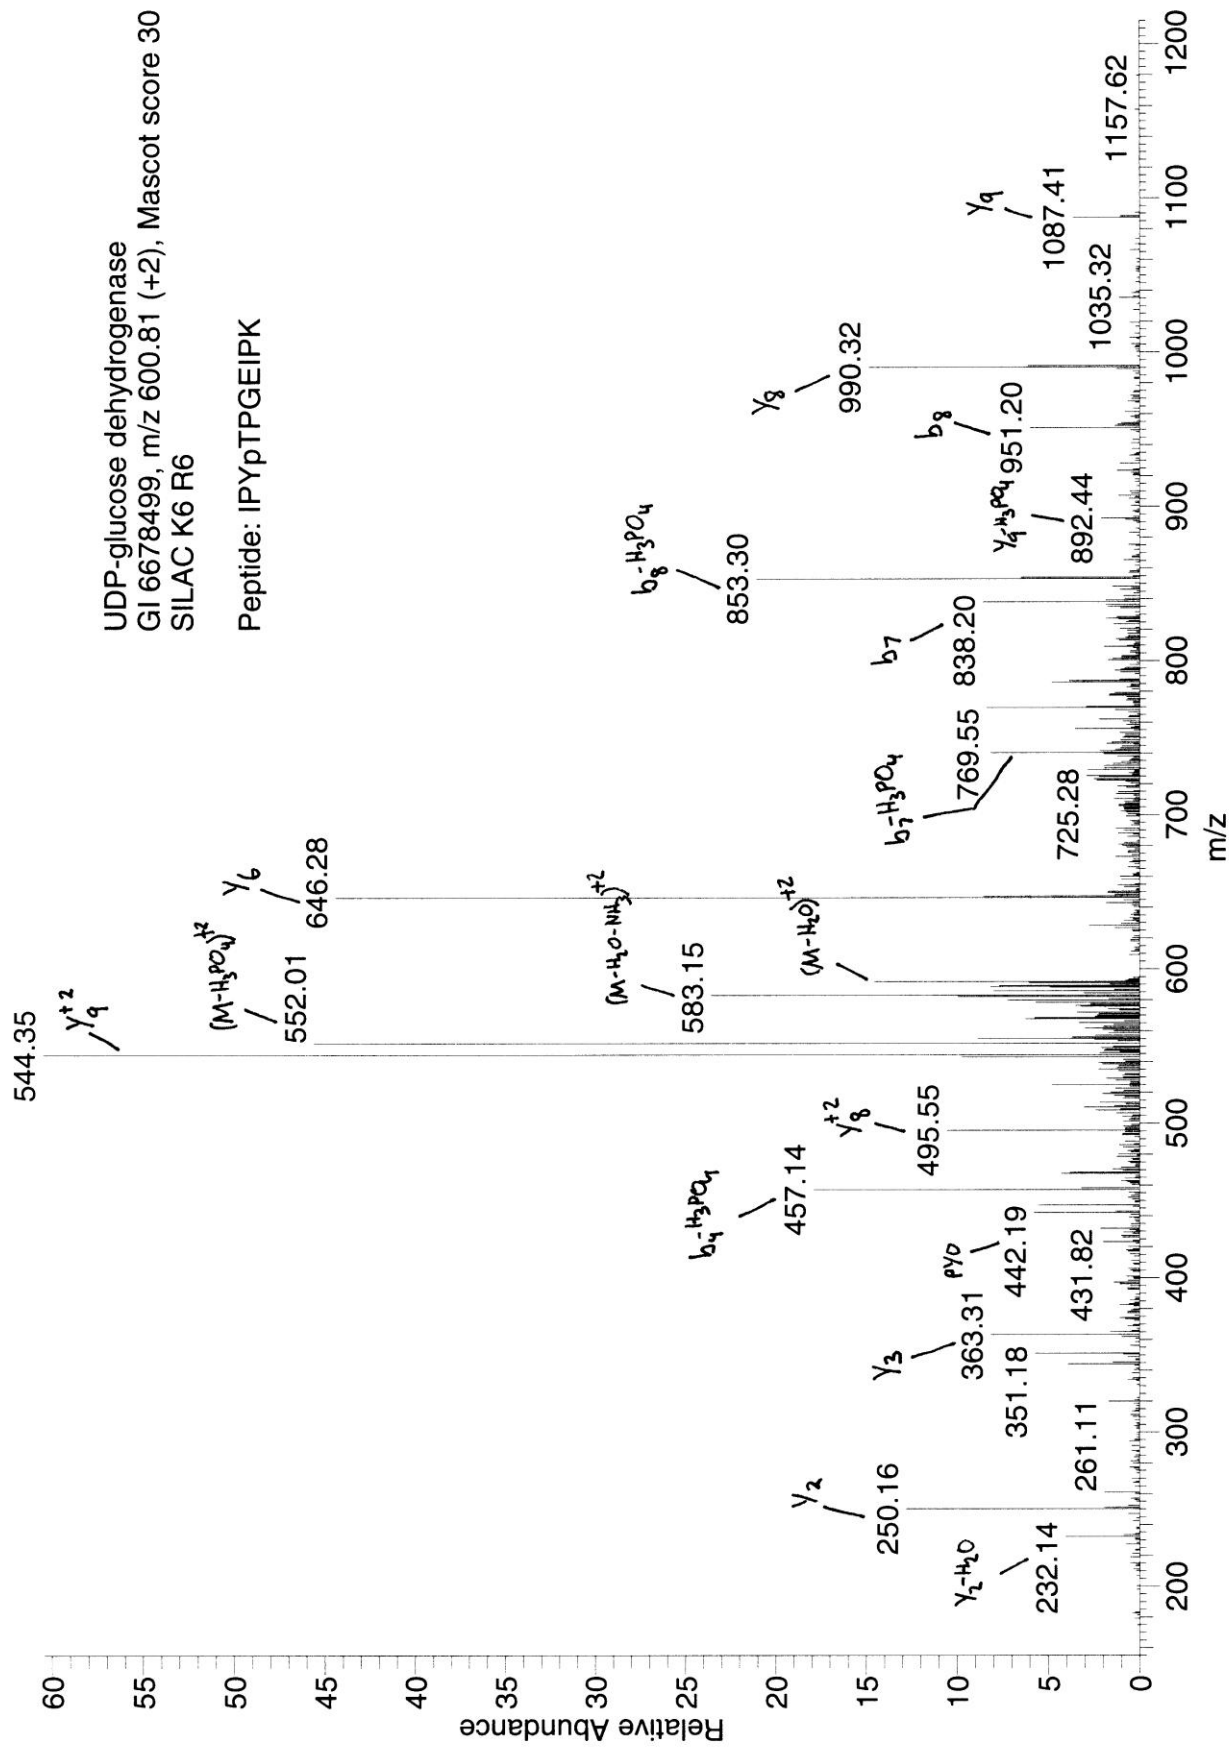

UDP-glucose dehydrogenase  
 GI 6678499, m/z 600.81 (+2), Mascot score 30  
 SILAC K6 R6

Peptide: IPYpTPGEIPK

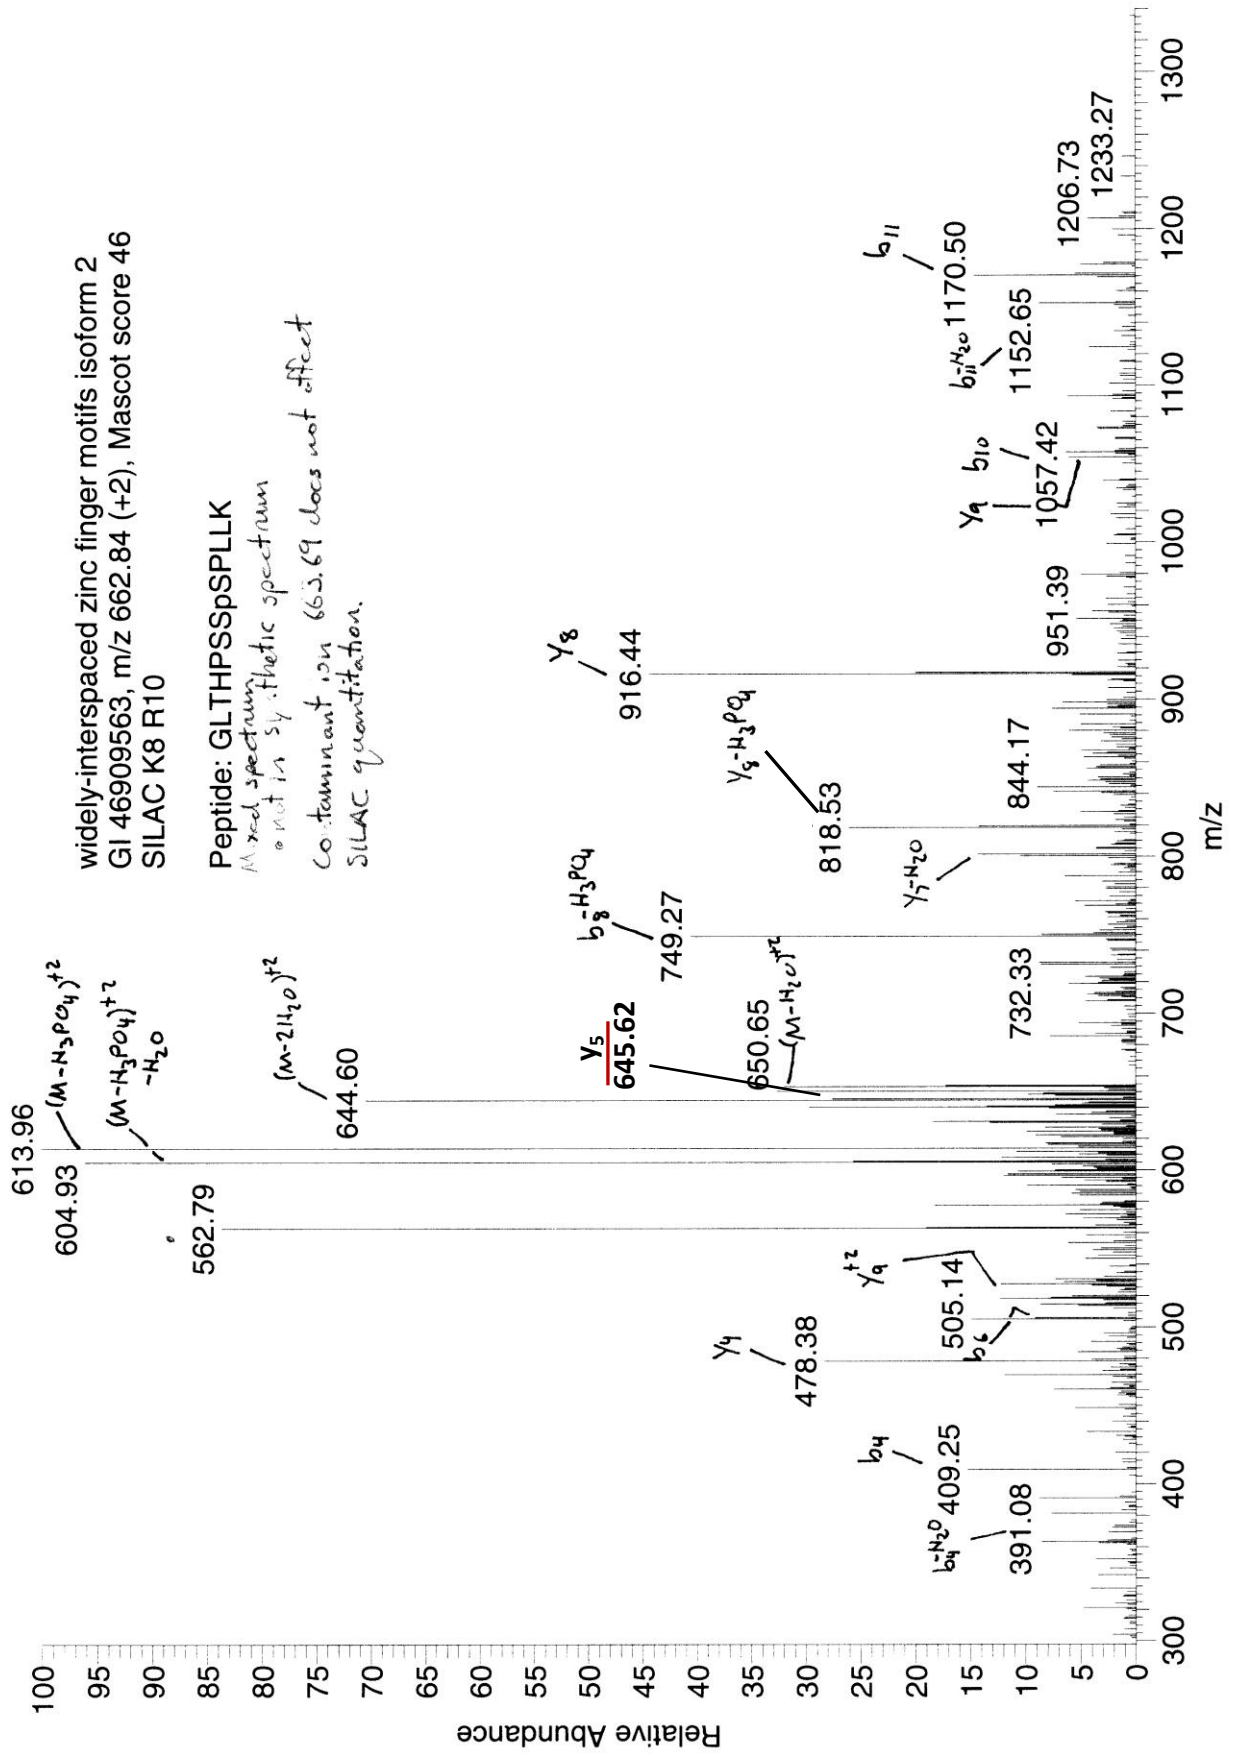

widely-interspaced zinc finger motifs isoform 2  
 GI 46909563, m/z 662.84 (+2), Mascot score 46  
 SILAC K8 R10

Peptide: GLTHPSSpSPLLK

*Mixed spectrum  
 • not in synthetic spectrum  
 Contaminant ion 662.69 does not affect  
 SILAC quantitation.*
